# Supplementary material
Source: publisher figshare collection journal article supplement (https://gsajournals.figshare.com/ndownloader/files/27628667)
Supplement: Supplementary file 1 [file 27628667]

## Sheet: TGFam annotation
Protein ID	Chromosome or contig	Prerequisite tools	Start	End	CDS	Protein
HK_NBARC_NBARC.Chr01.1	Chr01	TGFam.ISGAP	1018090	1020894	ATGGCAGATAGTTCAGTATCGTTTTTACTGGACAAGCTGACTTTGTTACTTCAAGCAGAAGTGAATCTGCAGAGAGGGGTCCGTGAAGATGTTCAGCACATCAAATATGAACTAGAACGCCACAGGGGCATCTTGAGGGTGGCTGATGCTCTGGAAGACAAAGACCCTGAACTCAAAGCATGGGTTAAACGAGTAAGAGATGTTGCTCATGACATGGAAGATGCTATAGATGAATTTAGCCTTCGCCTTGTTGATCAACATGGACAAGGCAACAGTTCTTCTTTTCATGTGAATTTTTTCATCCGGCATAGGATTGCTTCAAATATACAAAATATCAAATCCAGAGTGGACATTATCTCCCAGGGACGTCCAAACATAGCTGGGATTGGCTCAGGCTCA…	MADSSVSFLLDKLTLLLQAEVNLQRGVREDVQHIKYELERHRGILRVADALEDKDPELKAWVKRVRDVAHDMEDAIDEFSLRLVDQHGQGNSSSFHVNFFIRHRIASNIQNIKSRVDIISQGRPNIAGIGSGSSQRLRLDSQGDALLLEEADLVGIDKPKRQLSDLLFNEEAGRAVIPIYGMGGLGKTTLAKQVYDDPKVKKRFRIHAWINVSQSFQLEVLLKDLVQQLHNVIGKPSPEAVGQMKSDQLKELIKNLLQQSRYLIVLDDVWHVKVWDSVKLALPNNNRGSRVMLTTRKKDIALYSCAELGKDFNLEFLPEEESWYLFCKKTFQGNPCPPYLEAVCRNILKMCGGLPLAIVAIGGALATKNRANIEEWQMVYRSFGSEIEGNDKLEDMKKV…
HK_NBARC_NBARC.Chr01.2	Chr01	TGFam.PM	1022613	1032455	ATGTCATCGGCGCCGTGGAGAGGCGAGGAGAGTGAAGAATCCTTCAAAGAGGGAAAGCTGAAAGTGACGAGGCAGGGTGATGGCACTTCCACCATGCACGTCCCTGCCTCCAAGTCCAAGCATCATCACCATGACCTCCACGACGACCTCGGAATCGAGATTGATCCTGAACTACGCTACAGCTTCCAGCGCAATTTTCAGTTTCTTCAGCGTGTTTTTAGCATTGACACTATGGTGAAACCTCTTCCTCCTGTCATGGCATACAATGTCTCTCGCAACTTGAACTTCTTCACTCGCATTTTCACACAATTCTTTGATCCTGAAGGTATTGCAAATGCCCAGAAATCCTTGGGCATAGGACAGGAAGATAAAGTTCGCAAAATCATGGCTGAGAGTGCA…	MSSAPWRGEESEESFKEGKLKVTRQGDGTSTMHVPASKSKHHHHDLHDDLGIEIDPELRYSFQRNFQFLQRVFSIDTMVKPLPPVMAYNVSRNLNFFTRIFTQFFDPEGIANAQKSLGIGQEDKVRKIMAESAVSFLLERLKPVFENKLKLFIGVEAEVIYLKAQLELIRAFLRAADVFEETDEELKVWVRQVRDVVHEAEDLLDELELVQVHNHTNGFSNYLSIRNMKARYRIAHELKAINSRMKTISSTRKRFLSKLDTASEASNSTYTGNAWHDQRGDALLLDNTDLVGIDRPKKKLIGWLINGCPARKVISVTGMGGMGKTTLVKKVFDDPEVRKLFKACVWVTVSQSCKIEELLRGLARKLFSEIRRPIPEGMESMCSDKLKMIIKDLLQRKRY…
HK_NBARC_NBARC.Chr01.3	Chr01	TGFam.ISGAP	1160230	1163505	ATGGCACAACCAGAGCGCAAATCAATGGATGCAGCTATTCTTGTGGATTCCATATCTGACATCTTAAAATGCTCACTGGCACCACCAGCAACACGCCTCTCGGCAAAGGACCTTCAACAGTTTCAAAACCATCTCGAAGGGATCCGTGACATGGTTCAAAAGGCGAACAACAACATTAACTCCCAAGATTCCTATGTTCTTGCTTGGTTACTCGAGGTCAAGGAAGTGGTCAACGATTTGGAGGATTTGATTGAGGTTCTACGTCACAAGGAGAGTGCCACTGCCAATGCCACAAGATCTCTCATCAAAGCCAGCCAAAACATGGCGCATCGCCTCAAAGTCACGCACCATGTCAAGAAAGCCTCTGAGGAGCTCAAACGCTTCTTAACCGAGGCACAA…	MAQPERKSMDAAILVDSISDILKCSLAPPATRLSAKDLQQFQNHLEGIRDMVQKANNNINSQDSYVLAWLLEVKEVVNDLEDLIEVLRHKESATANATRSLIKASQNMAHRLKVTHHVKKASEELKRFLTEAQNLSFSKEARNIERKLLDTVAKFENTLVAVGRENVKKEIINQLKQFVNSGGDGVVPVVTIVGVPGIGKTKLARLVCEDEQVKAHFGEQIWVHGNRETLDVESIATPVAGTVKKGNRFLLVLDDLRDENVEECLHKLRKRLTEAVGAILITTRSNFVANYKIPGTVKLYALRGLNQEESWSLFQQIREQGSSNHINESVEREKVKEYCGGGVPMKIITIARLLNCSESPLSEAVLKEEFLQELKFTYYHQLPMHQKLCYVYCSLFPQD…
HK_NBARC_NBARC.Chr01.4	Chr01	TGFam.PM	1240033	1243281	ATGGACGTAACTATTCTTGCCGATGCCATATCCGACATCCTAGGACGCACTGGCTCCTCCCTTGCACTCCCAAAGGAGAATGTTAAAGAGTTTGAAGATGTTCTCAGAAAGATCAATGACGTGGTTCACAAGGCCAAGCAGAACAACTCCCTAGACCCCAATGTTCTGCTTTGGTTGAAAGAGGTCAAGGACAAGGTCAACGACTTGAACGATTTGATGGATGATCTCCCTCACAAGCAGGGAAACGCTGCCATAATATCGCTCATCAAAACTGGCCAAAGCATGGTGCATCGTCACAAAGTCACACAACAACTCAAGAAAGCTACTGGGCTGCTCAAAAGCTTCGCAACGGAGGGAGAAAAATTGTCCTTCACCCAAGAAGCAAAGAAGAACGAGAGA…	MDVTILADAISDILGRTGSSLALPKENVKEFEDVLRKINDVVHKAKQNNSLDPNVLLWLKEVKDKVNDLNDLMDDLPHKQGNAAIISLIKTGQSMVHRHKVTQQLKKATGLLKSFATEGEKLSFTQEAKKNERKLKDISGDKFVAVGRENAKKEIVDQLKLFVKNSGNGAVSFPVVTIVGVAGIGKTKLARLVCEDEEVKALFGSPTWVQGNHETFDVESVATCVTKIVDQGNRFLLVVDGLKDEESLQKLQRKLACVSGVVLVTTRNNFVANNIAVSGAVKPYALQGLNQDESWLLFQQIRGQGSSNIKEDVERQIVWEYCGGVPMKIATAAKLIKCSESSFFRDKLEEEFLQELKFTYYHQLSMHQKLCFVYCSLFPQDHVIEAEKLIHLWMAEGFL…
HK_NBARC_NBARC.Chr01.5	Chr01	TGFam.PM	3393481	3399619	ATGGCTAATCAGCAAATAATCAACCATGCTTCTTCTTCTTCTTGTGTGGCCTCTCTCAAAAGATATGATGTTTTTCTTAGCTTTCGAGGAGAGGACACTCGCAAAAACATCACAAGCCATCTCTACCATGCTCTCTTCCAAGCCAAACTGGAAATCTACATAGACTACAGGCTTCAAAAGGGTGATGAGATCTCGCAAGCTCTCATTGAAGCCATTGAAGAGTCACAGGTATCCGTCATCATCTTCTCAGAAAAGTATGCTACCTCCAAATGGTGCTTGGATGAAATCACCAAGATTATAGAATGCAAGGAGGGTCAAGGACAAGTTGTTATACCCGTCTTCTATAAAATAGATCCATCACATATAAGGAAGCAACAAGGGTCTTTCAAGCAAGCGTTT…	MANQQIINHASSSSCVASLKRYDVFLSFRGEDTRKNITSHLYHALFQAKLEIYIDYRLQKGDEISQALIEAIEESQVSVIIFSEKYATSKWCLDEITKIIECKEGQGQVVIPVFYKIDPSHIRKQQGSFKQAFVEHEQDLKITTDRVQKWREALTKAANLAGWDFQTYRTEAEFIKDIVKDVLLKLNLIYPIELKGLIGIEGNYTRIESLLKIDSRKVRVIGIWGMGGIGKTTLATALYAKLFSRFEGHCFLGNVREQAEKQGLDFLRTKLFSELLPGENHLHENMPKVEYHFITRRLKRKKVFLVLDDVASSEQLEDLIDDFNCFGPGSRVIVTTRDKHIFSQVDEIYEVKELNDLDSLQLFCLNAFREKHPKNGFEELSESVIAYCKGNPLALKVLG…
HK_NBARC_NBARC.Chr01.6	Chr01	TGFam.ISGAP	3446965	3450410	ATGGCGGGGAGTTCTTCATCAGCTGCTGGGTCTCTTCTTCCTGTAATTAGGCATCATGTGTTCCTCAACTTCAGAGGGGAAGACACCCGTGACAACTTCATTAGACACATTTATGAACAACTACAGAGGAAAAAGATTGAAACATATATAGATTACAGACTATCCAGAGGCCAAGAGATTTCACCTGCACTCCACAGAGCAATAGAAGAATCTATGATTTATGTTGTCGTTTTCTCTGAGAACTATGCATCTTCCACATGGTGTTTGGATGAACTCACAAAGATACTCGATTGCAAGAAGAGATATGGAAGGGTTGTGATCCCAGTTTTCTATAAGGTGGATCCATCAATTGTTAGGAATCAGAGAGAGACGTATGCAGAAGCATTCGTTAAGCATGAA…	MAGSSSSAAGSLLPVIRHHVFLNFRGEDTRDNFIRHIYEQLQRKKIETYIDYRLSRGQEISPALHRAIEESMIYVVVFSENYASSTWCLDELTKILDCKKRYGRVVIPVFYKVDPSIVRNQRETYAEAFVKHEHRFQDKFDKVHGWKAALTEAAGLSGWDSQVTRPEATLVAEIVKDILEKLDSSSISDHQGIVGIENHITRIQSLMNLESPDIRIIGIWGLGGIGKTTIARKIYHKLAPHFGSSSLVLNVQEEIQRHGIHHSRSKYISELLGKEKSFSNERLKQKKVLLILDDVNDSGQLKDLIGGRGDFGQGSRIILTSRGMQVLKNAEADEIYEVKEMNFQNSLNLFSIHAFHQNHPRETYMDLSIKVLHYAKGIPLALQSLGSLLYDRTKEAWES…
HK_NBARC_NBARC.Chr01.7	Chr01	TGFam.ISGAP	3478396	3481177	ATGGCGGGGAGTTCTTCATCAGCTGCTGTGTCTCTTCTTCCTCTAACAAGGCATCATGTGTTCCTCAACTTCAGAGGGGAAGACACCCGTGACAACTTCATTAGTCACATTTATGCTGAACTACAGAGGAAAAATATTGAAACATATATAGATTACAGACTATCCAGAGGCGAAGAGATTTCACCTGCACTCCACAGAGCAATAGAAGAATCTATGATTTATGTTGTCGTTTTCTCTGAGAACTATGCATCTTCCACATGGTGTTTGGATGAACTCACAAAGATACTCGATTCCAAGAAGAGATATGGAAGGGTTGTGATCCCAGTTTTCTACAAGGTGGATCCATCAATTGTTAGGAATCAGAGAGAGACATATGCAGAAGCATTCGTTAAGCATGAA…	MAGSSSSAAVSLLPLTRHHVFLNFRGEDTRDNFISHIYAELQRKNIETYIDYRLSRGEEISPALHRAIEESMIYVVVFSENYASSTWCLDELTKILDSKKRYGRVVIPVFYKVDPSIVRNQRETYAEAFVKHEHRFQDKIDKVHAWKAALTEAAGLSGWDSQVTRPEATLVAEIVKDILEKLDSSSISDHQGIVGIENHVTRIQSLMNLESPDIRIIGIWGSGGIGKTTIARQIYHKLASKFGSSSLVLNVQEEIERHGIHHIISEYISELLEKDRSFSNKRLKRTKVLLILDDVNDSDQLKDLIGGRGDFGQGSRIILTSRDMQVLKNAEADEIYEVKEMNFQNSLNLFSIHAFHQNYPRETYMDLSIKVLHYAKGIPLALKILGSLLDGRTKEAWES…
HK_NBARC_NBARC.Chr01.8	Chr01	TGFam.PM	3667287	3672960	ATGGCTGAGGCTGTTGTTGAAATTGTGCTTGAGAAATTGAACTCGCTCATTCAAAAGGAGCTAGGACTATTCTTTGGTTTCGATGAAGACATGAAAAGGATTGCCAGCTTGCTCACTACAATCAAGGCTACGCTTGAAGATGCTGAGGAGAAAAAATTCTCAAACATAGGTATTAAATATTGGCTGGGAAAGCTAAAGGATGCAGCTCGCATCCTGGATGACATCTTGGACGAGTGTGGTCCATCAAACAAGGTACAAAGCTCTTACTTATCCTCTTTTCTTCCCAAGCATGTTGTTTTCCATTACAAAATTGTTAAGAAAATGAAAAGGGTAAGAGAGATGTTAGAAGAAATTTCTGATGAAAGGAATAAGTTTAATTTGACTGAGATGGTTCTTGAG…	MAEAVVEIVLEKLNSLIQKELGLFFGFDEDMKRIASLLTTIKATLEDAEEKKFSNIGIKYWLGKLKDAARILDDILDECGPSNKVQSSYLSSFLPKHVVFHYKIVKKMKRVREMLEEISDERNKFNLTEMVLERSRVIEWRKTTSSITDRQIYGREEDKDKIVNFLVDDAPQSEDLSVYPIVGLGGLGKTTLAQLVFNHKKVVSHFELRFWVCVSEDFSLRRMIKAIIKAASGHACEDLDLEPQQRRLQDLLQRKRYLLVLDDVWDDKQENWQKLKSLLACGAKGASILVTTRLSKVAEIMGTIKIPHELSLLSDNDCWELFKHQAFGPNEVELENMGKEIVKKCRGLPLAAKALGSLLHSARKKHEWFMNVKGRNLLELSLEDNSIMASLRLSYFKLP…
HK_NBARC_NBARC.Chr01.9	Chr01	TGFam.PM	3721097	3722470	ATGGCTGAGGCTGTTCTTGAGACTGTGCTTGAGAATTTGAACTCACTCATTCAAAAGGAATTGGGACTATTTCTGGGTTTTGACCAAGACGTGAAAAGGCTGAGACAATTCTCAGACAGATCTATAAAGGATTGGCTGCAAAAGCTTAAAGATGCAGCTCACGTCCTGGATGACATCTTGGATGAGTGTGCCTATGAAGCATGGAGGTTGGAGTACCAAGGAGTCAAGTGTTGTCTATCAGACAAGGTACAATGCTCTTGCCTGTCCTCTTTTCATCCCGAGCATGTTGTTTTCCGTTACAAACTTGCTAAGAAAATGAAAAGGATAAGTGAGAGATTAGAAGAAATTGCTGATGAAAGGACTAAGTTTCATTTTACTGAGATGGTTACTGACAAAAGA…	MAEAVLETVLENLNSLIQKELGLFLGFDQDVKRLRQFSDRSIKDWLQKLKDAAHVLDDILDECAYEAWRLEYQGVKCCLSDKVQCSCLSSFHPEHVVFRYKLAKKMKRISERLEEIADERTKFHFTEMVTDKRNGVLEWRQTTSFITEPEVYGREEDQDKIIDFLVGDASHSEDLSVYPIIGLGGLGKTTLAQLIFNHERVVNNFEPRIWVCVSEDFSLKRMTKAIIEVASGRACEDLLLEILQRRLQDLLQSKRYLLVLDDVWDDEQENWQKLKSILACGAQGASVLVTTRLSKVAAIMGTMPPHELAMLSDNDCWKLFKHRAFGPNEVEQEKLVILGKEIVKKCGGVPLAAKALGGLLRFKREEREWLKIKESNLWSLPHNIMPALRLSYLNLPIKL…
HK_NBARC_NBARC.Chr01.10	Chr01	TGFam.ISGAP	4167589	4174105	ATGGGAGGGGTTGGTAAGACAACCCTAGCCAAGAGCCTCTTCAACAGCCTTGTTGTTCACAATTTTGAGCGACGCAGTTTCATTACAAATATTAGATCACAAGTCTCCAAACATGATGGTTTGGTTTCTCTTCAAAACACAATTCATGGTGATCTTTCTGGTGGGAAAAAGGATCCAATCAACGATGTCAATGATGGTATTTCTGCTATCAAAAGAATAGTACAAGAGAATCGAGTTTTGTTGATCTTAGATGATGTTGATGAAGTAGAGCAGCTTAAATTTTTGATGGGTGAGAGGGAATGGTTTTACAAAGGAAGCCGTGTTGTAATAACCACAAGGGATAGAGAAGTTTTAACTAAGGCTAAGAGTTATGTTGATAAACATTATGAGGTGAAGGAA…	MGGVGKTTLAKSLFNSLVVHNFERRSFITNIRSQVSKHDGLVSLQNTIHGDLSGGKKDPINDVNDGISAIKRIVQENRVLLILDDVDEVEQLKFLMGEREWFYKGSRVVITTRDREVLTKAKSYVDKHYEVKELEFSPSMELFCYHAMRRKEPAEGFLDLAKQIVEKTGGLPLALEVFGSFLFDKRTMREWKDAVEKMKQISPSGIHDVLKISFDALDEQEKCIFLDIACLFVQMEMKREDVVDILNGCNFRGDIALTVLTARCLIKITGDGKLWMHDQVRDMGRQIVHSENLADPGLRSRLWDRDEILIVLKSMKGTRNVQGIVVDCVKRRMSTPRDRSADEITWENFRRKPSCKLALEYIKEKYKKYVRDREEKAKEVVLQAKNFESMVSLRLLQIN…
HK_NBARC_NBARC.Chr01.11	Chr01	TGFam.PM	5419486	5423452	ATGAATGGACTTACGATGTTTTCCTTCGTTTTCAGGGTGAGGATACCTGGACCGGTATTACAAGAAATCTTTATCATACTTTGTGAAAAGGGAATCAACGCCTTCATGGATGATCAAGGGGTAAGGAAGGGAGAAGAAATTACACCAACTTTAATGAAGGCAATTCAAGAATCCAAGATTGCTATTGTGATCTTTTCAGAAAACTATGCATCATTAACTTTTTGTTTACAAGAACTTGTGAAGATTATGGAGTGCTTCAAACACAATGGGAGACTGGTTTGGCCCATTTTTTATAAAGTAGATCAAGTTGACATGGGCCATCCGAAAGGAAGCTATGTAGAAGCACTAGTCAAGCATGAAACAAGAATCAGTGAAAAGGACAAGCTGAAAAAAATGGAG…	MNGLTMFSFVFRVRIPGPVLQEIFIILCEKGINAFMDDQGVRKGEEITPTLMKAIQESKIAIVIFSENYASLTFCLQELVKIMECFKHNGRLVWPIFYKVDQVDMGHPKGSYVEALVKHETRISEKDKLKKMEVSFARSFKSIWLAFQQRVKTIEAHDLVRYGGADEGFEIVGILVQSFLVRVELEVVICFFELIESFVYGFESIVECSCLALCKKKILLILDDVDNLEQLKVLAGELDWFGSGSRIIITTRDIHQLHSHGVETERTYKVDGLNHDEALELFSWHAFKSKQVNPSFQNISLRIIQHFDCLPLPLEILGSDLFGKTVPEWNSALDAYERIPHKSIQKILIVSYDGLEELEKEIFLDLACYFVGYKQRNVMAILQSGRGITLDYAIQVLID…
HK_NBARC_NBARC.Chr01.12	Chr01	TGFam.ISGAP	5425892	5430237	ATGGAAATCTTCCGGGAGGTACTTCATTTTCTGCAGAAATTCTTTATTTCGCTGTTCACATGGTGCATTACGTACCTGATAAGAGGCTCGTCCAGGAGAATCAATGCTGTGGCTACCATGCCTAATCCAACATTGGCGTCCTCCTCTTCTTTGGCCTATGAATGGACTTACGATGTTTTCCTCAGTTTTAGAGGTGAGGATACCCGCTTGGGTTTTACCGGACACCTTTATCATGCTCTGTGTGAAGTGGGAGTCAACACCTTCATGGATGATCAAGGGCTGAGGAAGGGAGAAGAAATCACACCATTTCTAATGAAGGCAATTCAAGAATCCAGGATTGCTATTGTGATTTTTTCAGAAAACTATGCGTCATCAACGTTTTGTTTACAAGAACTTGTG…	MEIFREVLHFLQKFFISLFTWCITYLIRGSSRRINAVATMPNPTLASSSSLAYEWTYDVFLSFRGEDTRLGFTGHLYHALCEVGVNTFMDDQGLRKGEEITPFLMKAIQESRIAIVIFSENYASSTFCLQELVMIMECLKHQGRLVWPVFYKVDPSDVRHQKGSYAEALAKHETRISDKDKVEKWRLALQKAASLSGWHSNRRYEYDIIRDIVLEVSKKINRNPLHVAKYPVGLESRVQKVKSLLDVESNDGVHMVGIYGIGGIGKTTLACAVCNFVADQFEGLSFLSDVRENSEKHGLVHLQETLLSDILEEKDIKLGNEKRGTPIIKSRLRKKKILLILDDVDKMDQLEHLAGGLHSVDWFGSGSRIIITTRDIHLLDFYGIERTYEVDGLNQEEAL…
HK_NBARC_NBARC.Chr01.13	Chr01	TGFam.AUG	6919110	6924119	ATGCTGAGTGTAGAAGCAAAGCTTCATGGTGAATCAAAGAGACAGTTGTCAGACAGAGCTATAAAGGATTGGTTGAAAAAGCTAAGTGATGCAGCTTACGAGCTGGATGACTTCATGGACGAGTATGCCCATGAAGAATTGAGGTTGGAATGCGAAGGAGTCATGTGTTGTCTATCAGAAATGGTATTAAGTTCTTTCTTACCCTCTATTAATCCTGTGCATGTTTTTTTCCACTACAAGATTCCTAAGGAAATGAAAAGGGTAAGTGAAAAATTAGACGAAATTTCTGAAGAAAAGCTATCCCACAATGATTGTTGGGAATTGTTTAAACACCAAGCCTTTGGACCAGATGAGAAAGAACGGGTAAAGCTTGTGGCCATAGGGAAGAAGATGGTGAAG…	MLSVEAKLHGESKRQLSDRAIKDWLKKLSDAAYELDDFMDEYAHEELRLECEGVMCCLSEMVLSSFLPSINPVHVFFHYKIPKEMKRVSEKLDEISEEKLSHNDCWELFKHQAFGPDEKERVKLVAIGKKMVKKCWEMSLVAKALRGLLRFKSEEKEWHYIMESNLWSLIYNETYIMFVLRLNHLNLPIKLKQCYAYYAIFSKDEIIVKQYLIDLWMTNGFISSNGILDVEDVGEGAWNKLYWRSFSQYIKTYDFGQVTSSLKLSSLPTQIGKLTSLRSLTRYADGKERKFLLAELGKLKLKGFLDIEHLERVKSVKDAKEFNMLKWELQKNVEEILEVLQPDTQQLESLDVVGYEELCDLPILESFLDYFKNLPLLHELIIDSCSKLRYLPMSLSLNC…
HK_NBARC_NBARC.Chr01.14	Chr01	TGFam.PM	7087742	7088540	ATGACAAAAGCTATCATTGAAGCAGTGTCTGGGTGTGCTTGTGAGGATTTGGATTTAGAGCTACTACAAAGAAAAATTCAAAATCTTTTTCAAAGAAAAAAATATTTTCTTGTTTTAGATGATGTGTGGGATGATGAGCAAGATAATTGGCAAAAGGTTGCATTAATCATGGGAACAATGTCTCCTCGTGAATTATCAATGCTATTCGAAAATGATTGTTGGGAATTATTTAAACACCAAGTCTTTGGACCAAATGAGGAGATAGTAAAGAAGTATGGGGGAACACCTCTTGTAGTAAAAACACTTGGAGGTCTTTTACGCTTCAAAAGAGAGGAAAAAGAGTGGATCTTTGTTAAGGACAACAACCTTTTGCTTTTAATATACAATGAAAACTCCATC…	MTKAIIEAVSGCACEDLDLELLQRKIQNLFQRKKYFLVLDDVWDDEQDNWQKVALIMGTMSPRELSMLFENDCWELFKHQVFGPNEEIVKKYGGTPLVVKTLGGLLRFKREEKEWIFVKDNNLLLLIYNENSIMLALRLSYLNLPIKLKQCFAFCAIFGKDERIWKQNLIELWMANGFISSNKILDVEDVGDGVWQELYWRSFFQDIEKDGFGIICCIRDLLHSNYWCNYFV*
HK_NBARC_NBARC.Chr01.15	Chr01	TGFam.PM	10105908	10108568	ATGGCTGAGGCTGTACTGGAAGTTGCACTTGGAAATTTGAGCTCTCTGATTGGAAAAGAGCTTGAACTCTATCTGGGTTTTGATCATGACTTGGAAAGGCTTGCTAGCTTACTCACTACCATTAAGGCTACGCTTGAAGATGCCGAGGAGAAACAATTCTCAGACAGAGCCATAAAGGATTGGCTGCAAAAGCTGAAAGATGCAGCTCACATCCTTGATGAAATCTTGGATGAGTATGCCACTGAAGCATTGAAGTTGGAATACCATGAAATCAAGTGTGGTCTATCAAACAAGGTACAAAGTTCTTGCTTATCCGCTTTTCATCCCAACCATGTTGTTTTCCGTTACAAAATTGCTAAGAAAATGAAAAGGATAAGTGAGAGATTAGAAAGAATTGCT…	MAEAVLEVALGNLSSLIGKELELYLGFDHDLERLASLLTTIKATLEDAEEKQFSDRAIKDWLQKLKDAAHILDEILDEYATEALKLEYHEIKCGLSNKVQSSCLSAFHPNHVVFRYKIAKKMKRISERLERIAEERIKFHLTEMVSERSGIIEWRQTSSFITEPQVYGREEDTDKIVDFLIGDASHLEDLSVYPIVGLSGLGKTTLAQLIFNCERVVNHFELRIWVCVSEDFSLKRMTKAIIEATTGHASEDLDLEPLQRRLQDLLQRKRYLLVLDDVWDEVQENWQRLKSVLACGAKGASILVTTRLPKVAAIMGTMPPHELSMLSDNDCWELFKHRAFGPNEVEQVELVIIGKEIVKKCRGVPLAAKALGGLLRFKRDEKEWIYVKESNLWSLPNNE…
HK_NBARC_NBARC.Chr01.16	Chr01	TGFam.AUG	13253241	13263893	ATGGGATCATCAGTGGAGAATGGATGCAGTTCCACGCGCTTGAAGAACAAGAGGTTGTCGTCCACGACAGAGAAACTGGGAGTTGGAGTAGGTGTTGAATTGATGGAGGGTGTAAACCGCAACCTATTCTTGCGCCACTCTGTGCACATGGAAACTGTGGTTTTGGGTAAAGTCCGTGATGCTGCTACCGAAAATGCACTTCAAATTGGAGGAGGTGCAATCAAACGACATGTGGGATACTTTTTTAATTACAATGAAAAATTTGAAGAGGTGAAACATTACATTGAAATGTTGAGTAATGCTAGGAAGAGGGTACAAAATGAAGTTACGGATGTGGAAATGAATGCAGAAGAAATTGAGGATGATGTTCAACAATGGTTAAAACAGGTGGATGAGAAG…	MGSSVENGCSSTRLKNKRLSSTTEKLGVGVGVELMEGVNRNLFLRHSVHMETVVLGKVRDAATENALQIGGGAIKRHVGYFFNYNEKFEEVKHYIEMLSNARKRVQNEVTDVEMNAEEIEDDVQQWLKQVDEKIKKYKSFIHDECHAKTRCSFGFFPNNLQWRYRLGSNATKMIEEIKIEELWNKRFDKVSYRVRPSIDSAFANTGYESFVSRTKTMEMIMEALKDSKVNMIGVYGVGGVGKTTVVKEVAKKAQEKKLFNMVIIANITRNPDIKKIQGQIAEMLGMRLEEETEIVRANRIRKRIKKEKENTLIILDDLWDGLDLNRLGIPSSDDDDDDDRSQTVVKDISDFGYNKMENQELFSVNFKMMKKDMLFADFNKMKKEKLSGDHKGCKILLTS…
HK_NBARC_NBARC.Chr01.17	Chr01	TGFam.PM	32867513	32874401	ATGGAGAGCCTAACCGATAGAACAGAATTGCATCACAGTGGGGAAATGAGAGACGGACAAAGCAGCATCATCACCCAACTAGCCCTGACGCCGGAAACCGCGAGCGTTCTCAAGGAATCAATCGCAATGGCCCGCGAGAAGAAACACCTTCATACCACTCCGCTCCATGTGGTGGCCAAGCTTCTCGATTCCCCATCGGGATTCCTGCACCAAGCCTGCATGAAATCGCAACCGACATCTTACCCACTTCAGTACCAGGGGCTGGAGCTATGCTTAAATGTGGCCATGAACCGATTGCCTATGAGCATTTCTTCCATGGAGCCACTAATCTCCAATTCCTTGAAGGCTGCCTTCAAGCGAATCCGTGCCCAGCAGCATGGCAGGCAGCCTCCATCCACG…	MESLTDRTELHHSGEMRDGQSSIITQLALTPETASVLKESIAMAREKKHLHTTPLHVVAKLLDSPSGFLHQACMKSQPTSYPLQYQGLELCLNVAMNRLPMSISSMEPLISNSLKAAFKRIRAQQHGRQPPSTDKVELEQLILSILDDPSVSKVMKAAGYSSPDISATFQRGRKYEVFISFRGEDTRSSFTSHLYAALQNAGIIVFKDDESLPRGHHISDSLLLAIEQSQISVVVFSRNYADSRWCLKELERIMECHRTIGHVVVPVFYDVDPSEVRHQTSHFGNAFQNLLNRMSIDLNSSGEMEMMLNNETNLHGKSWREALREAASISGVVVLDSRNESEAIKNIVENVTRLLDKTELFIADNPVGVESRVQDMIQLLDQKLSNDVELLGIWGMGGI…
HK_NBARC_NBARC.Chr01.18	Chr01	TGFam.ISGAP	32884278	32893708	ATGTCTTCCTCCCGTTATGACTCCGATCTCCATGATGACTTTTTCCGTGAATGGTACCAGGACGACAATAGAAAGTATGATGTGTTTATGAGTTTCAGAGGAAAAGACACGCGTGCTTCTTTCACTTCACATCTCTATGCCGCTCTTAAGAATGCAGGAATCACTGTTTTCAAGGATGATGAGACACTTTCAAGGGGAAAACACATCTCACACTCGCTGCGGCTGGGAATAGAACAGTCTCGAATTTCTGTTGTTGTTTTCTCGAGAAATTACGCAGAGTCGCGGTGGTGTTTGCAAGAGTTGGAGAAAATAATGGAGTGTCACAGAACAACAGGGCAGGTAGTACTACCTGTGTTCTATGATGTTGATCCCTCTCAGGTACGTCATCAAAAAAGCCAC…	MSSSRYDSDLHDDFFREWYQDDNRKYDVFMSFRGKDTRASFTSHLYAALKNAGITVFKDDETLSRGKHISHSLRLGIEQSRISVVVFSRNYAESRWCLQELEKIMECHRTTGQVVLPVFYDVDPSQVRHQKSHFGKAFEKLLNTILKEIGDKWPQVVGWREALHKATHNQRCWKNSHVNLWRKGLCEAGGVPVVVVFSSSGETEIANEISLILKHWREALCKAAGIVLNCSPQPQLRSQHNGYLTVCNCIKTAVTVASAAFSCNCSPQYKDCLTRRNHHSPPEMSATISGSAVLNSSVEMEMANNEIDDLIQSWKDALHKAAGISGVAVLNHRGEMDTSNEINQFVKRWTEALREAASISGVVVQNFKNESEAIKHIVENVTHLLDKTELFVANNPVGV…
HK_NBARC_NBARC.Chr01.19	Chr01	TGFam.ISGAP	38772395	38787039	ATGTTTGCCTTCGCAGGAATGGCACCGAGGAAGCTTGCCTCAAAGAGGTCCAGGAAGGACAAGGCGGCCGAAGGAACTAGTTCCGCCCCGGAGTACGACAGTCACCGCTTTAGGAGCGTTGTACACCAGCAGCGTTTCGAAGCCATCAAGGGATGGTCGTTTCTCCGGGAGCGACGCGTCCAGCTCAGGGACGACGAGTATACTGATTTCCAGGAGGAAATAGGGCGCCGGCGGTGGGCACCACTGGTTACTCCCATGGCCAAGTTTGATCCAGAAATAGTCCTTGAGTTTTACGCCAATGCTTGGCCAACAGAGGAAGGCGTGCGTGACATGAGATCCTGGGTTAGGGGTCAGTGGATCCCGTTCGATGCCGACGCTATCAGCCAGCTCCTGGGATAT…	MFAFAGMAPRKLASKRSRKDKAAEGTSSAPEYDSHRFRSVVHQQRFEAIKGWSFLRERRVQLRDDEYTDFQEEIGRRRWAPLVTPMAKFDPEIVLEFYANAWPTEEGVRDMRSWVRGQWIPFDADAISQLLGYPMVLEEGQECEYGQRRNRSDGFDEEAIAQLLCIPGQDFARTAAGRRVRIMRTNMTTLTQIWMTLLLSNILPTDHNSDLPMPKCQLVYAILTRMSIHVAQLIADAIYIFAGMAPTRHPLDPDKSNRALGFPALITGLCQSFGVPVAPTKVIRPPITRAFIEKYCTQRQAQGDAPQAAGAPPPPHQAGQAGAFDMEQYLRHLVRQQAANHRAHVRTHDCLYQMSLSMQSQGFAPFSCPTPDQFRAEVAWPGDWPEAQAGEAPPEAPGD…
HK_NBARC_NBARC.Chr01.20	Chr01	TGFam.PM	41459052	41469262	ATGGCACATACTTCCTCGGGAGCTTCTGAAATAAAATATGTTCTTTCTCTTTGTCTCCTGCTTACTTCGGGATTGATGGTTGCTGCATCAAAGCAAATGTTAGATAATGTTCCTCAAATGAAGTATGATGTTTTTGTTAACTTCAGGGGCAAGGACATCCGTGACGGTTTTCTCGGTTATTTGACTCGGGCTTTTCATCAAAAGCAAATATATGCTTTCATAGATGATAAACTTGAGAAGGGAGATGAAATATGGCCATCACTTGTTGGAGCAATTCAGGGATCATCGATTTCATTGACCATATTCTCCGAAAACTATACTTCTTCACGTTGGTGTTTGGAAGAACTTGTGAAAATACTTGAGTGCAGGGAGAAATACAGACAAACTGTAATACCTGTT…	MAHTSSGASEIKYVLSLCLLLTSGLMVAASKQMLDNVPQMKYDVFVNFRGKDIRDGFLGYLTRAFHQKQIYAFIDDKLEKGDEIWPSLVGAIQGSSISLTIFSENYTSSRWCLEELVKILECREKYRQTVIPVFYGVNPTDVRHQKGNYGEALAVLGKKYNLTTVQNWRNALKKAADLSGIKSFDYKTEVDLLGEIINTVNLVLISLDTHPFNIKGHIGIEKSIQHLESLLHQESKYVRVIGIWGMGGIGKTTIAEEMFKKLYSEYDSYYFLENEEEESRKHGTISLKEKLFSALLGENVKMNILHGLSNYVKRKIGFMKVLIVLDDVNDSDLLEKLIGNLDWFGRGSRIIITTRDKQVLIANKVDDIYHVGALNSSEALELFSFYAFNQNHLDMEYYK…
HK_NBARC_NBARC.Chr01.21	Chr01	TGFam.ISGAP	41543565	41552748	ATGGCAAATTCATCTTCCGGAGCTTCTCAAATGAAATTTGTTCTTGTTCTTTTTCTCCTGTTTATTTCCGGATTGATGGATGTAGCATCAGAGCAAATGCCAGCAGATAGCGTTCCTCAGATAAAGTATGATGTCTTTGTAAACTTTAGGGGCGAGGACATCCGTCACAGTTTTCTTGGTTATTTGACTGAGGCTTTTTATCAAAAGCAAATAAATGCCTTTGTAGATGATAAACTTGAGAAGGGAGATGAAATATGGCCTTCACTTGTTGGAGCAATTCAGGGATCATCGATTTCATTGACCATATTCTCCGAAAACTATACTTCTTCACGTTGGTGTTTGGATGAACTTGTGAAAATACTTGAGTGTAGGGAGAAATACGGACAAATTGTAATACCT…	MANSSSGASQMKFVLVLFLLFISGLMDVASEQMPADSVPQIKYDVFVNFRGEDIRHSFLGYLTEAFYQKQINAFVDDKLEKGDEIWPSLVGAIQGSSISLTIFSENYTSSRWCLDELVKILECREKYGQIVIPVFYGVNPTDVRHQKGSYGEALAQLGKKYNLTTVQNWRNALKKVADLSGIKSFDYKTEVELLGEIINIVNLVLTSLDKFDPESSRLIGIDKQIQHLESLLHQESKYVRVIGIWGMGGIGKTTIAEEIFSKLRSEYDGYYFLANVKEESSRQGTIYLKRKLFSAILGEDVEMDHMPRLSNYIKRKIGRMKVLIVLDDVNDSNLPEKLFENHDWFGRGSRIIITTRDKQVLIANKVDDIYQVGALNNSEALELFSLYAFNQNHFDMEYY…
HK_NBARC_NBARC.Chr01.22	Chr01	TGFam.ISGAP	41752045	41752708	ATGGCGGACATGGCAGTTTCCATAGCACGAGAGAAATTGCTTCCACTGATAAGAGATGAAGCAAATCTGATTTGGGACATGCCCAAAGAATTTGCAGACCTAAAAGATGAACTAGAATACATTCAAGCTTTCCTCAAGGATGCAGATAAAAGGGCTGCTGGCAAAGGAGACAACATGAAAGAGGGAATCAGAAACTGGATTAAGTCATTTGTACATGGAATCAAGCAAAAGGCTAAAGATTATCAGTTCCAAATCCAACCTTCTTCTGAACATGGGAAGAGAAGTCATAAAGGTAGTCAAGTTGTTCAATGGCATGACCCTCGAACGGCTTCTCGTTACCTTGAAGAAGCTGAAGTTGTTGGCATTGAAGGGCCAAGAGATGAATTGATTGGTTGGTTA…	MADMAVSIAREKLLPLIRDEANLIWDMPKEFADLKDELEYIQAFLKDADKRAAGKGDNMKEGIRNWIKSFVHGIKQKAKDYQFQIQPSSEHGKRSHKGSQVVQWHDPRTASRYLEEAEVVGIEGPRDELIGWLVGVPAYRTVISVVGMGGLGKTTLVNRVFNN*
HK_NBARC_NBARC.Chr01.23	Chr01	TGFam.ISGAP	42100075	42117321	ATGCTCAAGAGCCCTAACAGAACAACCGAAGGAGGAGCTTTAGAGAGCACCAGAAACACCACCATTGCTAATGGAGAACGCTTGAGCGACTACATGAAGAGGAATGACCCACCGTCCTTCAAGGGGGTTTATGATCCTAAGGGTGTTGAGGCTTGGTTGAGGGAGATTGAGAAGATCTTCCGGGTGACGGAGTGTCAAGACCAACAAAAGACTTTTCTACAGAAGTATTTTCCAGAAGATGTAAAGAACATGAAGGAGATGGAGTTCCTCGAGCTAAAACAGGGGAGCATGATGATCTTATCCGAGATAGATCTCAGGTCAAGTTACCACCAGATTAAAGTAAAGTCAGAGGATATTCCAAAGACTACCTTTAGGACTTGTTACGACCATTATGAGTAC…	MLKSPNRTTEGGALESTRNTTIANGERLSDYMKRNDPPSFKGVYDPKGVEAWLREIEKIFRVTECQDQQKTFLQKYFPEDVKNMKEMEFLELKQGSMMILSEIDLRSSYHQIKVKSEDIPKTTFRTCYDHYEYLVMPFGVTNAHSVFMDYMNKTFHPYLGSFVVVFIEDILVYSKTREEHEEHLRVVLQTLKDNKMYAKLSKCDFWLEKVSFLGHVISRGGIAVDPSKRELNIRQRRWLEFLTDYDFELSYHPGKANVVVDALSRKSLQMYALMVRKLDLLEQFRDMSLAFVITFGSIKLGMLRTPEGLDSIWVIMDRLMKSAHFIPINIRYSLERLTSFYVSEIVRLHGVPSSIIFDRDPRFTSRFWESLHKVLGGSLCFVTHILPCSIPLASPHIVN…
HK_NBARC_NBARC.Chr01.24	Chr01	TGFam.AUG	46671331	46674503	ATGGCAGAAACTGTAGTGTCCTTGGCTGGTCAGCACGTGCTTCCAAGATTTCTGGAAGTGGTCAATATGCTGAGAGGTCTAAAGAAAGAAGTTGAAGACATTAAAAAAGAACTGGAGAGCTTTCAACATTTCATCAATGATGCGGATAAAGTGGCTGAAGCTGAACAAGATGATGGAAAGCACATTACAAATAAAAAAAAAAGGGTGAAGCGGCTGAGAGAAGCTGCTTTTTCCATGGAAAATATCATTGATTTATATGATATCTATGAGGACAAGCAACCTGGTGATCCTGGATGTGCAGCTTTACCCTGTGAGGCTGTTGACTACATCAAAACTCTGATCTTTTGGCTCCAAATAGTATTTAAGATTCAGGAAGAATGGGAGAACTGGGAAAAACAA…	MAETVVSLAGQHVLPRFLEVVNMLRGLKKEVEDIKKELESFQHFINDADKVAEAEQDDGKHITNKKKRVKRLREAAFSMENIIDLYDIYEDKQPGDPGCAALPCEAVDYIKTLIFWLQIVFKIQEEWENWEKQLLPSWFMTTWRFMHASIVEHGSVSKSYTAEGLLREMLDMLCNEKVEDPAPNFETLTRKLRNGLCNKGYVVVFDDVWNKRFWNDIQFALIDNKNGSRILITTQDTQVAQFCMKDSLIQLKLEPLSEEKSLELFCKKAFGYGFDGRYPKEYKDLGLEIIGKGQCLPLAIVAIGGLLYSKCKSAAEWKRFSQNLSLELERNSELSSISQILCLSYDDLPYNLRSCLLYFGMYPEDYDGFVKHVTGETLEEVAQQYLAELINRSLVQVSS…
HK_NBARC_NBARC.Chr01.25	Chr01	TGFam.AUG	46731034	46733003	ATGGCTGAGGCTTTGCTGGGAACTGTGATTGAAAACTTGCCATCTTTTGTCCAAGACGAACTTACTATGTTTTGGGGTGTTGGCCAACAGACTCATAAGCTTTGCACCAATCTCACTGCAATCCGTGCTGTTCTCAAAGATGCTGAGAAAAAGCAAGTAACAGGCCATGTACTGAAGGATTGGCTGCAAAAACTAACAAATGCAGCATATGTGCTCGATGATATCTTGGATGAATGTTCAATACAATCCAAAAGGGTGCATTCTGATGAGCATAATTCATGCTTATTAGCCCATGTCCATCTCAAGAACATTCTTTTTCATTATTGTATTGGCAAGAGGATGAAAGACATTACCAAAAGATTCCAAGACATCAATGAAGAAAGGCGCATGTTTGAATTA…	MAEALLGTVIENLPSFVQDELTMFWGVGQQTHKLCTNLTAIRAVLKDAEKKQVTGHVLKDWLQKLTNAAYVLDDILDECSIQSKRVHSDEHNSCLLAHVHLKNILFHYCIGKRMKDITKRFQDINEERRMFELRTSVTEKQGEDECGMGQNHNLNTLEAMRKKVQQMGTKGATILVTTRLEQVASIMETHPAYRLIKLSQDYSWSLFKHHAFGPNREEREEIVAIGKEIVRKCVGSPLAIKTLGSLLCDEIEVTQWQNIKGSEFWNIREESSITGEETSIMHFEIVKEELIHLWMANGFIKSEGNLEVEDVGNKVRRKLYNRSFFQEAKLDGLGIITSFKMHDLFHDLARSIMGEECVVHDHIRKLNPCGTFLDFGFKLGHNHWLPSIHCLRALRTSSS…
HK_NBARC_NBARC.Chr01.26	Chr01	TGFam.PM	48985563	48988328	ATGGCCGAGGTTGCTGTGTCAACGGTCGTTACCAAGCTGACGGAGCTGCTGGTGGAACAAGCAGCAGTGGCGGCGGTGTCGGTTTCACAGCTGGCAGGGGTGAGAGAGCAAGTGGAGAACCTGAAGAACGAATTGGGGTGGATGCAGAGCTTTCTGAGGGACGCAGATGCAAAACAAGAAGGCAACGACCGCGTTCGCATGTGGGTGTCGGAAATCCGAGACGTGGCTTTCGAAGCAGAGGAGCTCATAGAAACCTACGTGTACAAGACCACCATGCAGAGCAGCTTAGACAAGGTGTTCAGACCCTTTCATCTCTACAAGGTGAGGACCAGAATCGACAAGATCCTGTCCAAGATCAAGAGCATATCCGACCGGCGCGAAACATACGGCGTCGTTGTA…	MAEVAVSTVVTKLTELLVEQAAVAAVSVSQLAGVREQVENLKNELGWMQSFLRDADAKQEGNDRVRMWVSEIRDVAFEAEELIETYVYKTTMQSSLDKVFRPFHLYKVRTRIDKILSKIKSISDRRETYGVVVMTRDDGNNSNERLRHWRQPSPYSEEEYVIELEDDMRLLFTQLLAVEPTPHVVSIVGMGGLGKTTLAKKLYNHTRITNHFECKAWVYVSKEYRRRDVLQGILRDVDALTRDEMEKIPEEELVNKLRNVLSEKRYLVVLDDIWGMEVWDGLKSAFPRGKMGSKILLTTRNGDVALHADACSNPHQLRTLTEDESFRLLCNKAFPGANGIPLELVQLKSLAKEIVVKCGGLPLAVVVVGGLLSRKLKSSGEWKRVLQNISWHLLEEQEK…
HK_NBARC_NBARC.Chr01.27	Chr01	TGFam.ISGAP	49990143	49993394	ATGACAGACCCGTTAGCTGGAGCTGCTGCGGGAGAGTTGTTGAAAGGGGCTCTTGAAATCATTCGCAGCGGTTACGAGTTCCGACCCACCCTCGAAAGAAGCAGAGAAACCTTCGACTCTTTATCTTCTCGAGTACAAAAGATTAAACAGTTGAACAGGAACCTGGATAGCTCCACAGAGGAGATAGATAAGTTGGAGGCTCTTGTGCGAGATGGTAAAGAGCTTATTGACAAGTACTCCAAAGTTACTTGGTGGAGATTTCTCTGCTTCCCTTGTTACCAGTGCAAGCTTAAGGCCAGTGAGGATGCTCTGACGAGACACACAACTACGATTGAGCCGGTTCACATTAGGCTCGGAATGATGGAGATCCAGTCCGGCATCAAAATCATTCTCCAGACT…	MTDPLAGAAAGELLKGALEIIRSGYEFRPTLERSRETFDSLSSRVQKIKQLNRNLDSSTEEIDKLEALVRDGKELIDKYSKVTWWRFLCFPCYQCKLKASEDALTRHTTTIEPVHIRLGMMEIQSGIKIILQTLLMSGKENIGGAIEEPECIGMEQHLNKLKIELLKDGMSVLVLTGLPGSGKTTLAKKICWDTDIKGKFGVNIFVTVSKTPNLKSIVGTVFHGCRRPVPEFQSDDDAINRLSALLLSVGGNDKNPILLVLDDVWPGSEALVDKFTVQIPYYKILVTSRVAYPRFGTKILLGQLDHNQAVALFAHYAKLNDNSPYMPEEDLLHEIVRRCMGSPLVLKVTAGSLCGQPFEMWEKKKDRLQNQSKMEFSQTDLFCHLQQSLDALEDEFHIN…
HK_NBARC_NBARC.Chr01.28	Chr01	TGFam.ISGAP	49995570	49999795	ATGGAAGATCTGTTCAGTGGAGGTGCTGTGGGAGCAGTGATGGGGGAGTTACTGAAAGGGGCTATTGCGACCATAAACAAAGGTCGAGACTTCAGACCCACCCTCGAGAGCAACATAGAAACCTTAAACTCTCTGGCTCCTCAAGTGGAGGAGATGAAGCGTTACAACAAGATGCTGGATCGCCCCATAGAGGAGATAGAGAGGTTGGAGTCTCAAATGCGAGCTGGCGAAGAGCTTGTTCGCAAGTGCTCCAAATTCGGTCGCTGGAGAATGCTCTCTTTCCCGTATTACCAGAGCAAGCTTCGGAGCAAGGACGAGGCTTTGAAGAGGCACTTTTCGGTGAACGTTTCGGCGGAGAACAAGAGGGACTTGATGGAGATCGTGGCCAGTGTGAGACAG…	MEDLFSGGAVGAVMGELLKGAIATINKGRDFRPTLESNIETLNSLAPQVEEMKRYNKMLDRPIEEIERLESQMRAGEELVRKCSKFGRWRMLSFPYYQSKLRSKDEALKRHFSVNVSAENKRDLMEIVASVRQILDILSKKEGFGHSFHLRGLSGAPQEPECVGMDVPMSKLRIDLLKDGVSVLVLTGLGGSGKSTLAKKICWDPQVKGKFGGNVFFVTVSKTPNLKNIVETLFEHCGCPVPKFQSDEDAINRLGFLLRLVGKNPILLVLDDVWPSSEALVEKFKLDIPDYKILVTSRVSFPRFGTPCQLDKLDHDHAVALFCHFAQLNGKSSYMPDENLVHEIVRGCKGSPLALKVTAGSLCQQPYEVWQNMKDCLQSQSILLESSSSDLLFRLQQSL…
HK_NBARC_NBARC.Chr02.1	Chr02	TGFam.PM	2305307	2318917	ATGCCTCCGGCCGCACGCGCGAGCGCAAGCGAGGTGATGGAATCTTCTACTATAATGGAAGAGGAACAAGTTCCGCAAGAAACGATGGCGGCGCCTATCCCCGCCGCATATCCGCCTTTTCCCGGCGCGGGTTTTCCGATGAGTCTATCTCCGGTGGTGTTGCCGGTGAGTGGTGAGAGACTGACCAAGCCGATCAGGCCGACGCCGATTGTACCGGTGCCTCCGTCTTCGAAGATGGCTAATTTGAACTTGAAAGGGAAAGCTTCTCGGACAAATCTCATTGAGCCTTTGCCGTTGTCGTTGAATCTGCCATCGCCAACGCCGCGAACTTGGAAGATGGCGGAGGCAGTTCTTGAAGTTGCACTCGAAAAGTTGAGCTCTCTCATTGAAAAAGAGCTG…	MPPAARASASEVMESSTIMEEEQVPQETMAAPIPAAYPPFPGAGFPMSLSPVVLPVSGERLTKPIRPTPIVPVPPSSKMANLNLKGKASRTNLIEPLPLSLNLPSPTPRTWKMAEAVLEVALEKLSSLIEKELGLFLDFDRDMKKLRSMFTTIKATLQDAVEKQFSDEAIKDWLPKLKEAAYELDDILDECAYEALGLEYQGVKSGQSHKVQCSCLSSFHPKHVVFRYKIAKRMKRITERLDEIAEERQKFHLTKTALERTRIIEWRQTSSIISERQVYGREEDTKKIVDVLMANADAYHSESLLVYPIVGLGGLGKTTLAQLIFNHKMVINKFEIRMWVCVSEDFSLNRMTKAIIEAASGQACENLDLDLLQRKLQDLLRGKRYLLVLDDVWDDKPNN…
HK_NBARC_NBARC.Chr02.2	Chr02	TGFam.ISGAP	2750508	2753105	ATGGCTGGGGCTGTTCTTGAAATTGCGCATGAAAATTTGAAGTCTTGCACTACAATGATTAGAGATCAAAGGGATGATGGACTCTTACTGGGTTTCGATGGAGACATGGAAATGTTTGACAGCTTGTTCACTGCAATCAAGCCTTATTCTCAAAAAGTAAAAGATTCAGTTTACGAGCTGGATGACATCTTGGACTATTGGGTCAATCAAGTATTGCGGTTGAAGCACCAAGAAGTCAAGTCTAATCTACTAGTCAAGTTGCAAAGCTCTTTCTTACTCTCTTTGCATCCAAAAAGAACTAATCTTCATTTGATTGAGACGGTTCCAGAGAGAAATGAAGTCAATGAGTGGCGCGAAACAACTTCACTTTCCGATGGACCACAAGTCTATGGAAGAAAA…	MAGAVLEIAHENLKSCTTMIRDQRDDGLLLGFDGDMEMFDSLFTAIKPYSQKVKDSVYELDDILDYWVNQVLRLKHQEVKSNLLVKLQSSFLLSLHPKRTNLHLIETVPERNEVNEWRETTSLSDGPQVYGRKHDTNIIDLLGYPIVGQGGLGKTTLAQLIFNHGMVVNHFESRIWAYVSENFDLMRVTKDIIEAASGCVCENLDIGLLQRKLQDLLQRKGYLLVLDDWLKPILACGGKGASILVTTRSSKVAIVMGTMPPHELSMLSHNACWELFKHQAFVSNEVQEVGLERIGKEIVKKCGGVPLAAKVLGGLLHFNKDKTKWQYISESTLCQTMSYCAIFPKDEIIRKQELIEFWMANGFISSNEILDAEDVGHGCCITNDNDVTTLSERIHHISD…
HK_NBARC_NBARC.Chr02.3	Chr02	TGFam.ISGAP	2801044	2803671	ATGGCTGAGGCTGTCGTTGAAATTGTGCTTGAGAAATTGAACTCACTCATTCAAAAGGAGCTGGGACTATTTTTGGGTTTCGATCAAGACATTAAAAGGATTGCCAACTTGCTCACTTCAATCAAGGCTACGCTTGAAGATGCTGAGGAGAAAAAATTCTCAAACAGAGATATTAAACATTGGCTGGGAAAGCTAAAAGATGCAGCTCGTATCCTGGATGACATCTTGGACGAGTGTGGTCCATCAGACAAGGTACAGAACTCTTACTTGTCCTCTTTTCATCCAAAGCATGTTGTTTTCCATTACAAAATTGCTAAGAACATGAAAATGATAAGAGAAAAATTAGAAAAAATTGCTAATGAAAGGACTGAGTTTAATTTGACTGAGATGGTTCGTGAG…	MAEAVVEIVLEKLNSLIQKELGLFLGFDQDIKRIANLLTSIKATLEDAEEKKFSNRDIKHWLGKLKDAARILDDILDECGPSDKVQNSYLSSFHPKHVVFHYKIAKNMKMIREKLEKIANERTEFNLTEMVRERSGVIEWRKTSSVITEPHIYGREEDKDKIIEFLVDDASHYEDLSVYPIVGLGGLGKTTLAQLIFNHEKVVHHFELRIWVCVSEDFSLRRMTKVIIEEATGRAREDMDLEPQQRGLQDLLQRKRYLLVLDDVWDDKQENWQKLKSLLACGAPGASILVTTRLSKVAEIMGTIKIPHELSLLSDNDCWELFKHQAFGPNEVEHVELEDIGKEIVKKCGGLPLAAKELGSLLRFERKKNEWLNVKERNLLELSHNGNSIMASLRLSYLN…
HK_NBARC_NBARC.Chr02.4	Chr02	TGFam.AUG	3022639	3024499	ATGGCTAACCTGCAAATGGTCAACTATGCAGCTGCTGCTTCTTCTTCTTCTTGTGTGGCTTCTCTCAAAAGTTATGATGTTTTTCTTAGCTTTCGAGGCGAGGACACTCGCGGCAACTTCACAAGCCATCTCTACGATGCTCTCATCCAAGCCAAACTTGAAACCTACATAGACTACAGGCTTCAAAAGGGTGAGGAAATCTCGCAAGCACTCATCGAAGCCATTGAAGAGTCGCAGGTATCCGTTGTGATCTTCTCAGAAAAGTATGGTACCTCCAAATGGTGCTTGGATGAAATCACCAAGATTATGGAATGCAAGGAGGGTCAAGGACAAGTTGTTATACCCGTCTTCTATAAAATAGATCCATCTCATATAAGGAAGCAACAAGGTTCTTTCAAT…	MANLQMVNYAAAASSSSCVASLKSYDVFLSFRGEDTRGNFTSHLYDALIQAKLETYIDYRLQKGEEISQALIEAIEESQVSVVIFSEKYGTSKWCLDEITKIMECKEGQGQVVIPVFYKIDPSHIRKQQGSFNKAFEEHKRDPNITNDRVQKWRSALTKAANLAGWDSITYRTEAKFIKDIVKDVLYKLNLIYPIETKGLIGIERNYAEIESLLEIGSREIRVIGIWGMGGIGKTTLAISLHAKLFSQFEGHCFLGNVRVQAEKHGLNALRRTLFSELFPGENLHVHVPKVESHFITRRLKRKKVFLILDDVASSEQLEDLIGDFNCFGPGSRVIVTTRDKHIFSHVDEIYEVKELNHHDSLQLFCLNAFREKHSKNGFEELSESVLAYCKGNPLALKI…
HK_NBARC_NBARC.Chr02.5	Chr02	TGFam.PM	3137636	3140039	ATGTTTATTAAGAAGAGGTCATGGATAACCCACAAGAGGATTTGTCTCAATATGTTTTCAGTCAATGTTGGCTTCCTCGATTACACAGTTGACCACACGCATTCAACGGTAGGGACTAAGACCTTCTCTTTACAATTTGGAAGACAGATTCGTGAAAGATCCATTTATGCCAACTCCTTCCTCTATCTACATGTGAGACCTTTGATTGGAATATGGGAAATGGGAGGCAGAGAAAAGCATGGATGTCTTTCGCAACAAACTTTCCTGAGTTGTTCCCACGAGAAAAAATATTCATGCACATGTGCCAAAGTTGAATCCTATTTTATAACGAGAAGACTTAGACGTAAAAAAGTTTTAATTGTTTTGGATGATGTGTCTTCCTCAGAACAGTTAGAAGAT…	MFIKKRSWITHKRICLNMFSVNVGFLDYTVDHTHSTVGTKTFSLQFGRQIRERSIYANSFLYLHVRPLIGIWEMGGREKHGCLSQQTFLSCSHEKKYSCTCAKVESYFITRRLRRKKVLIVLDDVSSSEQLEDIISDFDCLGPGSREIVTTRDKHIFSHVDEICEVNELNDCDFFLLFHLNAFREEHPNKDMKSYQNLFFLKVSESVIAYCKGNPLPLKFWERSMEKSHNKSTVISFPPSGIESDLIQEMGIIHQESIKNLEDKLRCSLWFIDFSSLLFFFFSNLGFLDSDFVIACFRFKIFVHINTMLPPVGGGFGVPAVARHGGGEANRGAGDEGRRESFQFHAIILRCGWVETGSPILKESKRKWFDGNRVEFGVLR*
HK_NBARC_NBARC.Chr02.6	Chr02	TGFam.ISGAP	3912849	3915995	ATGGCATCCTCATCTTCTTGTCATGTTACTGAAATAAAACATGATGTCTTTATCAGCTTTAGAGGTACAGACGTCCGCAAAGGTCTGCTTAGCCATTTGAAAACCGAATTGCGCCGCAGACAGATTGATGCCTATGTGGATGAGAGACTTGACAGAGGAGATGAAATATCATCCTCACTTCTCAGAGCAATTGAAGAATCACAAATTTCATTGGTCATATTCTCAAAAGACTATGCTTCATCACAGTGGTGCTTGGAAGAGCTTGCCAAAATGATTGAATCCATGGAAATAAATAAACAGATTGTACTACCTGTTTTCTTCAATGTAGATCCATCACATGTGCGGCACCAATGTGGAGATTATGGAGATGCTTTAGCTAAACATGAAGAAAAACTCAAG…	MASSSSCHVTEIKHDVFISFRGTDVRKGLLSHLKTELRRRQIDAYVDERLDRGDEISSSLLRAIEESQISLVIFSKDYASSQWCLEELAKMIESMEINKQIVLPVFFNVDPSHVRHQCGDYGDALAKHEEKLKENMLKVKTWRSAMKKAADLSGFHYPTNFEDESDLVHGIVEDIWEKLSKFCPRESNGLVGIDQNIARIQSLLLMESSEVLFVGIWGMGGIGKTTIARAVFDKFSSQYDGLCFLNVKEELEQHGLSLLREKLISELFEGEGLHTSGTSKARFLNSSIRRMGRKKVLVVLDDVNTSEQIKDLVGEPTCFGAGSRVIITSRDQNVLTSGGVHQIHEVKEMDSRDSLKLFCLNAFNESQPKMGYEKLTEEVVKIAQGIPLALRVLGADFRS…
HK_NBARC_NBARC.Chr02.7	Chr02	TGFam.PM	6650275	6654029	ATGGCACACAGAACAGCACCATCTTGGTCTACCTTCACACTTAAATGGATTTATGATGTCTTCCTCAGTTTTAGAGGTGAAGACACTCGTCAAAAATTCACTGGCAATCTCTACAATTCTCTGTGTGAAAAGGGAGTTCATACTTTCATTGATGATGAAGGGCTTAGAAGAGGGGAAGAAATTACACCAGCTCTTCTCAATGCCATTCAAAATTCAAGGATTGCCATTGTTGTTTTCTCTAAGAACTATGCATCCTCAACTTTTTGTTTGGATAAACTTGTCAAGATCCTTGAGTGCTTGAAGGAAGAAAAAGGTCGATCAGTTTTTCCAATATTTTATGATGTGGATCCATCACATGTTCGGCATCAGAAAGGGACTTATTCAGAAGCATTGGCAAAA…	MAHRTAPSWSTFTLKWIYDVFLSFRGEDTRQKFTGNLYNSLCEKGVHTFIDDEGLRRGEEITPALLNAIQNSRIAIVVFSKNYASSTFCLDKLVKILECLKEEKGRSVFPIFYDVDPSHVRHQKGTYSEALAKHEERFPDDSDKVQKWRKALYEAANLSGWHFQHGELEYKSIRKIVKEVYKRISCIPLHIADNPIGLEHAVLEVKSLLGHGSDVNIIGIYGIGGIGKTTISRAVYNLICSQFEGTCFLLDIREKAINKQGLVQLQEMLLSEVLKKKHIKVGDVNRGIPIIKRRLEKKKVLLVLDDVDKLEQLKVLAGESRWFGNGSIIIITTRDKHLLATHGVVKIYDVKPLNVAKALELFNWCAFKNHKADPLYVNIANRAVSYACGIPLALEVIGS…
HK_NBARC_NBARC.Chr02.8	Chr02	TGFam.PM	10646968	10651800	ATGGCTGAGGCTGTCCTTGAAATTGTGCTTGAGAATTTGAAATCAATCTTGCAAAAGGAGCTGGGACAATTTTTGGGTGTCGATGATGACATGAAAAGGCTTGCTAGCTTGTTCACTACAATCAAGGCTACACTTGAAGATGCTGAGGAGAAACAATTCTCAAATAGAGTTATTAAGGATTGGCTGGCAAAGCTAAAAGATGAATCTCTCATTCTGGATGACATCTTGGAAGAGTTTGATCTACTAGACAAGAAAATGAAAAGGATACGTGAGAGATTAGATGAAATTCTTGATGAAAGGACTAAGTTTCATTTAACTGAGCTGAGAGAAGGAGTGGTGTCATTGAGATTTATCCGTCTACCAATCATTGGTCTAGGGGGACTTGGAAAAACAACACTT…	MAEAVLEIVLENLKSILQKELGQFLGVDDDMKRLASLFTTIKATLEDAEEKQFSNRVIKDWLAKLKDESLILDDILEEFDLLDKKMKRIRERLDEILDERTKFHLTELREGVVSLRFIRLPIIGLGGLGKTTLSQLIFNHERVVNHFELRIWVFVSEDFSLKRMTKAIIEEASACHCKDLDLQPLQRKLQHLLQRKRYLLLKSVLAYGVKGASILVTTRLSKVATIMGTMSPHELSELSDNDCWELFKHRTFGQNDVEQEELVGVPLAAKALGGILRFKRNKNKWLNVKESKLLKLSHNEKSIMFVLRLSYLNLPIKLRQCFAYCAIFPKDEKIEKQYLIELWMANGFISSNERLDAKEVGDGGVWNELYWRLFFQDIERDEFDKVTKDICCVTDDISI…
HK_NBARC_NBARC.Chr02.9	Chr02	TGFam.AUG	10654555	10667383	ATGAAAAGGATGAGTGAGAGATTGGATGAAATTGCTGATGAAAGGACTAAGTTTCATTTGGTCGACATGGTTCTTGAGAGAAGAAGTGGAGTCATTGAGTGGTGTCAAACTACATCATTCATCACTGAACCACAAGTTTATGGGAGAGAAGAAGATAAGGATAAAATTGTAGCCAACTACTTTGAGTTAAGAATTTGGGTATGTGTTTTGGAAGACTTCAGTTTGAAGAGAATGACAAAAGCTATCACCGAAGCAACATCTGGGTGTCATTGTGAGGATTTGGATATAGAGCCACTACAAAGAGAACTTCAAGCTTTGCTTCAGAGAAAAAGATATTTGCTTGTTTTGGATGACGTATGGGATGATGAGCAAGAAAATTGGCGAAGGTTGAAATCAGTA…	MKRMSERLDEIADERTKFHLVDMVLERRSGVIEWCQTTSFITEPQVYGREEDKDKIVANYFELRIWVCVLEDFSLKRMTKAITEATSGCHCEDLDIEPLQRELQALLQRKRYLLVLDDVWDDEQENWRRLKSVLVYGTKGSSILVTTRLLKERFIVFLCLKESAISQITLKNPLIESNCIQLHPIKSLRKCTLAHPLSGHALKCYWLRVLHYHSLGKLLSSIGHLKHLSLIRLKSLQRLSFNCCISLSSLPLQIRKLTSLRSLTTYFVGKEKGFFLEELGALKLKGDLHIEHLGKVKNVKDAKEVNMSNKKTLRIVAFFFPAEIQSCLGKTTIPVSLTIEDFRALGPCLKIQFFFLSAKFTVKYSLRFDKHLQIFKNIQDKMTFKKDFKQQMVPEWEKE…
HK_NBARC_NBARC.Chr02.10	Chr02	TGFam.ISGAP	10881998	10882582	ATGGATGAGTGTGCCTATGAAGAATTGGGGATGGAATACGGAGGAGTCAAGTGTTGTCTATCAGAAATGGTACGAAGTTCTTTCTTATCCTCTTTTAATTCCCGACATGTTTTTTCCCTTTACAAAATTGCTAAGGAAATGGAAAGGATAAGTGAGAGATTAAATAAAATTGCTGAAGAAAGGGAGAAGTTTCATTTGACTGAGACAACTCCAGAGAGAAGAAATGCTGTCACTGATCAACGCCAAACCAACCCATTCATCAACGAACCACAAGTCTATGGAAGAAATGCAGAGACAGAAAAAATTGTAGACTTTTTGCTTGGTGATGCCTCTCATTCTGCAGACTTATCTGTCTATCCCATCCTAGGGTTAGGAGGACTTGGAAAAACAACACTGGCC…	MDECAYEELGMEYGGVKCCLSEMVRSSFLSSFNSRHVFSLYKIAKEMERISERLNKIAEEREKFHLTETTPERRNAVTDQRQTNPFINEPQVYGRNAETEKIVDFLLGDASHSADLSVYPILGLGGLGKTTLAQLIYNHERVVNHFKLRIWICVSEDFSLKTMIKAIMEAASERTCEDLDLGLLQKKTSRPASK*
HK_NBARC_NBARC.Chr02.11	Chr02	TGFam.PM	12989319	12993090	ATGATGTTTTTCAAAGTTTTCGCGGTAAAGACACGTGATAACTTCACAAGCTATCTATATGATGCTTTGACTAGAGATAAAAGTGAAACTTTTATAGACAATTGGCTTGAAAAGGGAGATGAAATCTCACCAGCACTCATCAAAGCCATCGAAAATTCTCATACATCTATTGTCATCTTCTCAGAGAACTATGCTTCCTCAAAGTGGTGCTTAAATGAACTCAACAAGATTATGGAATTCAAGAAAGAAAAAGAACAAATAACTGAGTCTGAACTCCTTAAGGGCATTGTTCGAGATGTTTTGAAAAAATTGGCTCCTACGTACCCAAATCAGAGCAAAAGACTGGTTGGAATTGAGAAAAGTTATGAAGAAATTGAATCATTACTGAGAATTGGGTCA…	MMFFKVFAVKTRDNFTSYLYDALTRDKSETFIDNWLEKGDEISPALIKAIENSHTSIVIFSENYASSKWCLNELNKIMEFKKEKEQITESELLKGIVRDVLKKLAPTYPNQSKRLVGIEKSYEEIESLLRIGSSEVITLGIWGMGGIGKTTLATALYHKLSYDFEGRCFLANVRKKSDKLEDLRNELFSTLLKENKRQLDGFDMSRLQYKSLFIVLDDVSTREQLEKLIEEYDFMGAESRVIVTTRDKHILSTNHKIYQVDKLNCDHSVELFCFIVFGEKKPKQGYEDLSRRVISYCEVVPLALKVLGASLRERNKEAWECELRKLEKFPDMKILNVLKLSYDGLDRPQKDIFLDIACFFKGEERYWVTGLLEAFDFFPTSGIKVAMKRKEKLAGKENQ…
HK_NBARC_NBARC.Chr02.12	Chr02	TGFam.ISGAP	35114805	35117345	ATGGCCGAATCACTCCTTTTCTCCGTTGCAGAGTCACTGCTAGGGAAGCTTGCTTCTCGTGCCGTTGAAAAAGCTTCTCTGGCCATGGGGGTGTACCATGATCTACAACAGATGAGAGTGACTATGGCACTGGTCAAAGCCTTGCTGTTAGATGCTGAGCAAAAGAAGCAGCAGAACAATGCATTGAGCGAGTGGCTGAGACAGATTAAGCGCGTATTTTCGGATGCCGAAGACATAGTTGACAACTTTGAGTGTGAAGCTTTGCGGAAGCATGTTGTCAACACTCATGGTAGCGTCTCGAGGAAGGTACGTCGTTTGTTCTCAACTAGTAATCCTCTTGTTTATCGTTTAAGAATGGCACGTGAGATAAAAGGCATCAAGAACAGGTTAGAGAAGGTT…	MAESLLFSVAESLLGKLASRAVEKASLAMGVYHDLQQMRVTMALVKALLLDAEQKKQQNNALSEWLRQIKRVFSDAEDIVDNFECEALRKHVVNTHGSVSRKVRRLFSTSNPLVYRLRMAREIKGIKNRLEKVAADRHMFGLQINDMDTRVVHRREMTHSHVNASNVIGREDDKKKIIELLLQDGNDTSPSVISIEGFGGMGKTTLAKLVFNDLIIDECFPLKMWVCVSNDFELRNVLIKILNSTPNPRNENFKNFEMEQLQNRLRNTLHRQKFLLVLDDVWNENRVKWNELKDIIDIGVEGSKILVTTRSHAIAVMMRTKSSNYYRLEGLSEEHSLSLFLKSAFDDGEERKHPQLVEIGKEILKKCGGIPLAVRTLGSSLVSRVNRQEWESLRDNEIW…
HK_NBARC_NBARC.Chr02.13	Chr02	TGFam.PM	42472524	42483246	ATGTGCTCAAATAATAACACCTTAGTTCAGTTCTGTGGACCTGAAACTGAAAGTGACGGTAGCATCAATGGTAACTTCAGCGTTAGCTGTCTCAGTCAAGCATGCCCGTCCCCTTATGTATACGCTGTGGACTGTTTCTGTGCTGCACCGTTGGTTGTTAATTATCGATTAAAAAGTCCAGCATTTTCAGATTTCCGCATATACACGAATGCATTTCAGAGCTTGATGTCAAGTGGTCTTAAAATACATATTAGTCAGGTCTTCATTAACAGTTTTGCATGGGAAGAAGGCCCACGGTTGGGAATGAACTTGATGGTTTTTCCTATATATGTTGATAATAGAAGCTCTCCTCGTTTCAATACAAGTGAGGTTATTCGGATCAGAAACTTGTTCCTAGAC…	MCSNNNTLVQFCGPETESDGSINGNFSVSCLSQACPSPYVYAVDCFCAAPLVVNYRLKSPAFSDFRIYTNAFQSLMSSGLKIHISQVFINSFAWEEGPRLGMNLMVFPIYVDNRSSPRFNTSEVIRIRNLFLDFDVPSNDLFGPSELLDFILLEPYRNEIYICKLYYGCSDTAYIVTVIFTSPSSGISKGALAGIVLGAIALAVTLSAIVAILILRIRSRDYRTPSKRTKESRISIKIEDIRAFDYEEMAAATNNFSDSAQIGQGGYGRVYKGVLPDGTVVAIKRAQEGSLQGEREFLTEIQLLSRLHHRNLVSLVGYCDEEGEQMLVYEYMPNGTLRDNLSGSAKGLLYLHTEVDSPIFHRDVKASNILLDSKFTAKVADFGLSRLAPVPDIEGNVPG…
HK_NBARC_NBARC.Chr02.14	Chr02	TGFam.PM	45208638	45214083	ATGTTACGTGGAGAATCTTCCTCAAACTCTTGGCGATGGACATACCATGTTTTCTTGAGTTTTAGAGGAGAAGACACCCGTTTAGATTTTACAGATCACTTGTACGCTGCGTTAGTGCGAAAGGGAATCATAGCTTTTCGAGATGACAAACAACTCGAGAAAGGAGATGCGATTGCAGAAGAACTCCCTAAAGCAATTGAGGAGTCCCTTGGTGCCATAGTCATTCTCTCTGAGAACTATGCTTCTTCCTCTTGGTGTTTGGATGAGCTCAACAAAATTCTTGAATCAAATAGAGTTCTGGGGAGGGAAGTTTTTCCAGTCTTCTATGGGGTTAGTCCTGGTGAGGTTCAACACCAGAAGACCCAGAGTTTTTATGAGGCTTTTAAGAAACATGAAAGA…	MLRGESSSNSWRWTYHVFLSFRGEDTRLDFTDHLYAALVRKGIIAFRDDKQLEKGDAIAEELPKAIEESLGAIVILSENYASSSWCLDELNKILESNRVLGREVFPVFYGVSPGEVQHQKTQSFYEAFKKHERRSGKDTEKVQKWRDSLKELGQIPGWESKHYQHQTELIENIVESVWTKLRPKMPSFNDGLIGIGSRVKKMDSLLSIESEGVRFIGIWGMGGIGKTTVARVVFQKIKDQFDVSCFLDNVREISRETNGMLRLQTKLLSHLAIKGLEIIDLDEGKNTIINLLSEKKVLLILDDVDDTSQLDNLAKRVEWFGRGSRVIITTRDTQVLISHGVVENYNIEFLNSDESLQLLSQKAFKRDEPLEHYLELSKVVAKHAGGLPLALELLGSFLC…
HK_NBARC_NBARC.Chr02.15	Chr02	TGFam.PM	46459050	46466362	ATGGCAAACCATAAGGATGAGTCCCTTGGTTTCACTTTCACCTATGATGTTTTCCTGAGTTTTAGAGGCGAAGATACAAGGCACAAATTTATAGGACATCTCCGTAAAGAGTTGTGCCAAAAGGGGATAAAGGTTTTCTCTGATGATAAGGACCTGAGGATAGGAGAAGGTATTTCACCTGCTCTATCCAGTGCCATTGAAAAATCTAAGATTTTAATCGTTGTGTTTTCTGAGAACTACGCAGAGTCCACATGGTGCCTTGATGAACTCGTTAAGATCCTAGAATGTACCAAGATCATCATCAGGGACAAGAAACAACTTGTTTTCCCAATATTTTACCATGTAGACCCCTCAGATATACGGCATCAGAAAAAAAGTTACGGTGAGCACATGCTGGAA…	MANHKDESLGFTFTYDVFLSFRGEDTRHKFIGHLRKELCQKGIKVFSDDKDLRIGEGISPALSSAIEKSKILIVVFSENYAESTWCLDELVKILECTKIIIRDKKQLVFPIFYHVDPSDIRHQKKSYGEHMLEHQKRFGKDSQRVQAWRSALSEASNFPGHHISTGYETEFIEKIADKVYKHIAPNPLHTGQNPIGLWPRMEEVMSLLDMKPYDETVRMLGVWGLPGVGKTELATALYNNIVNHFDAASFLSNVREKSNKINGLEDLQKTLLSEMREELDTDLGCANKGMSEIKRKLEGKKVLLVLDDVDDKDKLEKLAGGRDWFGSGSRIIITTRDKDVLIAHQVDNIYQMEELDKHHSLELFCWNAFKQSHPKTGFEDVSLRAIDVAKGLPLALKVI…
HK_NBARC_NBARC.Chr02.16	Chr02	TGFam.PM	46469582	46476274	ATGAAAATTTTCTTTGATGATAGGGACCTGCCGGTGGGGAATGTTATTTCACCTTCTCTATCCAAGGCCATTGAAGAATCTAAGATTTTAATCATTGTGTTTTCTAAGAACTACGCATCCTCCACATGGTGCCTTGATGAACTTGTTAAGATCCTGGAGCAGTCCAAGATCAGTGAGATGAAACAACTTGTTTTCCCAGTTTTTTACCATGTAGATCCCTCAGATGTACGGAAGCAAACAGAGAGTTATGGTGAGCACATGACCAAACACGAAGAAAACTTTGGCAAAGCCTCCCAGAAACTGCAAGCTTGGAGGACAGCTTTGTTTGAAGCAAGTAACTTCCCTGGCCACCATATTACCACTCGCTCCGGGTATGAGATCGATTTTATTGAGAAGATT…	MKIFFDDRDLPVGNVISPSLSKAIEESKILIIVFSKNYASSTWCLDELVKILEQSKISEMKQLVFPVFYHVDPSDVRKQTESYGEHMTKHEENFGKASQKLQAWRTALFEASNFPGHHITTRSGYEIDFIEKIVEKVQKNIAPKPLYTGQNPVGLGPRVEEVMSLLDMKPYDETVRMLGVWGLGGVGKTELAKALYDNIVQSFDAASFLADVREKLNKINGLEDLQKTLLSEMREELDTELGSAIKGMFEIKRKLKGKKVLLVLDDVDDKDKLEKLAGGRDWFGSGSRIIITTRDKDVLIAHQVDNIYQMEELDKHHSLELFCWNAFKQSHPKTGFEDVSLRAIYVAKGLPLALKVIGSDLATLDEESLEDWKCALEEYERTPPERILDVLKKSYDRLG…
HK_NBARC_NBARC.Chr03.1	Chr03	TGFam.ISGAP	3864237	3867986	ATGGCAGCAGCACTGGTCGGTGGTGCCTTTCTCTCTGCTTTCCTTGATGTGCTTTTCGACAGGCTGGCTTCACCTGACTTTGTTGACCTGATCCGTGGAAAGAAGCTTAGCAAGAAGTTGCTTCAAAAGTTGGAGACCACTCTCAGAGTGGTTGGAGCTGTGCTTGATGATGCCGAGAAGAAACAGATCACAAACACCAATGTCAAACACTGGCTCAATGATCTCAAACATGCTGTCTATGAAGCCGATGACTTACTCGACCATGTTTTCACCAAAGCTGCCACCCAAAACAAGGTAAGAGACTTGTTTTCTCGCTTTTCCGATAGCAAGATCGTTAGTAAGTTGGAGGACATAGTTGTCACCCTAGAGTCTCGTTTAAAACTCAAGGAGAGTCTTGAT…	MAAALVGGAFLSAFLDVLFDRLASPDFVDLIRGKKLSKKLLQKLETTLRVVGAVLDDAEKKQITNTNVKHWLNDLKHAVYEADDLLDHVFTKAATQNKVRDLFSRFSDSKIVSKLEDIVVTLESRLKLKESLDLKESAVENLSWKAPSTSLEDGSHIYGREKDKEAIIKLLSEDNSDGSEVSVVPIVGMGGVGKTTLAQLVYNDENLKEKFDFDFKAWVCVSQEFDVLKVTKTIIEAVTGKPCNLNDLNLLHLELMDKLKDKKFLIVLDDVWTEDYVDWRLLKKPFNRGIIRRSKILLTTRSEKTASVVQTVHTYHLNQLSNEDCWSVFANHACLYSESNENTTTLAKIGKEIIKKCNGLPLAAESLGGMLRRKHDIGDWNNILNSDIWELSESECKVI…
HK_NBARC_NBARC.Chr03.2	Chr03	TGFam.ISGAP	3875929	3879672	ATGGCTGCAGCACTGGTAGGTGGTGCCTTTCTCTCTGCTTTCCTTGATGTGCTTTTCGACAGGCTGGCTTCACCTGACTTTGTTGACCTGATCCGTGGAAAGAAGCTTAGCAAGAAGTTGCTTCAAAAGTTGGAGACCACTCTCAGAGTGGTTGGAGCTGTGCTTGATGATGCCGAGAAGAAACAGATCACAAACACCAATGTCAAACACTGGCTCAATGATCTCAAAGATGCTGTCTATGAAGCCGATGACTTACTCGACCATGTTTTCACCAAAGCTGCCACCCAAAACAAGGTAAGAGACTTGTTTTCTCGCTTTTCCGATAGCAAGATCGTTAGTAAGTTGGAAGACATAGTTGTCACACTTGAGTCTCATTTAAAACTCAAGGAGAGTCTTGAT…	MAAALVGGAFLSAFLDVLFDRLASPDFVDLIRGKKLSKKLLQKLETTLRVVGAVLDDAEKKQITNTNVKHWLNDLKDAVYEADDLLDHVFTKAATQNKVRDLFSRFSDSKIVSKLEDIVVTLESHLKLKESLDLKESAVENLSWKAPSTSLEDGSHIYGREKDKEAIIKLMSEDNSDGREVSVVPIVGMGGVGKTTLVQLVYNDENLKQIFDFDFKAWVCVSQEFDVLKVTKTIIEAVTGKACKLNDLNLLHLELMDKLKDKKFLIVLDDVWTEDYVDWSLLKKPFNRGIRRSKILLTTRSEKTASIVQTVHTYHLNQLSNEDCWSVFANHACLSLESNENTTLEKIGKEIVKKCNGLPLAAQSLGGMLRRKRDIGKWNNILNSDIWELSESECKVIPA…
HK_NBARC_NBARC.Chr03.3	Chr03	TGFam.ISGAP	3890441	3894190	ATGGCAGCAGCAGTGGTAGGTGGTGCCTTTCTCTCTGCTTTCCTTGATGTGCTTTTCGACAGGCTGGCTTCACCTGAGTTTGTTGGCTTGATCCTTGGAAAGAAACTTAGCAAGAAGTTGCTTCAAAAGTTGGAGACCACTCTCAGAGTGGTTGGAGCTGTGCTTGATGATGCTGAGAAGAAACAGATCACAAACACCAATGTCAAACACTGGCTCAATGATCTCAAAGATGCTGTCTATGAGGCCGATGATTTACTCGACCATGTTTTCACCAAAGCTGCCACCCAAAAGAAGGTAAGAAACTTGTTTTCTCGCTTTTCCGATAGGAAGATCGTTAGTAAGTTGGAGGACATAGTTGTCACACTAGAGTCTCATTTAAAACTCAAGGAGAGTCTTGAT…	MAAAVVGGAFLSAFLDVLFDRLASPEFVGLILGKKLSKKLLQKLETTLRVVGAVLDDAEKKQITNTNVKHWLNDLKDAVYEADDLLDHVFTKAATQKKVRNLFSRFSDRKIVSKLEDIVVTLESHLKLKESLDLKESAVEYLPWKPSTSVENESHIYGREKDKEAIIKLLSEDNRDGREVSVVPIVGMGGVGKTTLAQLVYNDENLKQIFDFDFKAWVCVSQEFDVLKVTKTIIEAVTGKPCKLNDLNLLHLELMDKLKDKKFLIVLDDVWTEDYVDWSLLKKPFNRGIRKSKILLTTRSEKTASIVQTVHTYHLNQLSNEDCWSVFANHACLYSESNGNTTTLEKIGKVIVKKCNGLPLAAESLGGMLRRKHDIGKWNNILNSDIWELSESECKVIPA…
HK_NBARC_NBARC.Chr03.4	Chr03	TGFam.ISGAP	3924277	3927228	ATGGCAGCAGCACTGGTCGGTGGTGCCTTTCTCTCTGCTTTCCTTGATGTGCTTTTCGACAGGCTGGCTTCACCAGACTTTGTTGACTTGATCCGTGGAAAGAAGCTTAGCAAGAAGTTGCTTCAAAAGTTGGAGACCACTCTCAGAGTGGTTGGAGCTGTGCTTGATGATGCCGAGAAGAAACAGATCACAAACACCAATGTCAAACACTGGCTCAATGATCTCAAAGATGCTGTCTATGAAGCCGATGACTTACTCGACCATGTTTTCACCAAAGCTGCCACCCAAAACAAGGTAAGAGACTTGTTTTCTCGTTTTTCCGATAGCAAGATCGTTAGTAAGTTGGAAGACATAGTTGTCACACTTGAGTCTCATTTAAAACTCAAGGAGAGTCTTGAT…	MAAALVGGAFLSAFLDVLFDRLASPDFVDLIRGKKLSKKLLQKLETTLRVVGAVLDDAEKKQITNTNVKHWLNDLKDAVYEADDLLDHVFTKAATQNKVRDLFSRFSDSKIVSKLEDIVVTLESHLKLKESLDLKESAVENLSWKAPSTSLEDGSHIYGREKDKEAIIKLLSEDNSDGREVSVVPIVGMGGVGKTTLVQLVYNDENLKQIFDFDFKAWVCVSQEFDVLKVTKTIIEAVTGKACKLNDLNLLHLELMDKLKDKKFLIVLDDVWTEDYVDWSLLKKPFNRGIRRSKILLTTRSEKTASIVQTVHTYHLNQLSNEDCWSVFANHACLYSESNGNTTTLEKIGKEIVKKCNGLPLAAQSLGGMLRRKRDIGKWNNILNSDIWELSESECKVIP…
HK_NBARC_NBARC.Chr03.5	Chr03	TGFam.ISGAP	3944470	3947757	ATGGATCTCATATATGGTAGGGAGAAAGATAAGGAGGCCATAATCAAGTTGTTGTCGGAGGATAACAGTGACGGTAGTGAAGTGTCTGTGGTTCCTATTGTGGGCATGGGTGGGGTTGGAAAAACTACTTTGGCCCAATTGGTGTACAATGATGAGAATTTGGAAGAGATATTTGACTTTAAGGCATGGGTTTGTGTTTCTCAAGAACTTGATATTCTGAAGGTCACAAAAACTATAACAGAGGCGGTTACTGGAAAGCCTTGTAAATTGAATGATCTGAATCTACTTCATCTTGAATTGATGGACAAGCTGAAAGATAAAGAATTCTTAATTGTCTTGGATGATGTTTGGACAGAGAATTATGTTAACTGGAGACTTCTTAAGAAACCATTTAACCGT…	MDLIYGREKDKEAIIKLLSEDNSDGSEVSVVPIVGMGGVGKTTLAQLVYNDENLEEIFDFKAWVCVSQELDILKVTKTITEAVTGKPCKLNDLNLLHLELMDKLKDKEFLIVLDDVWTENYVNWRLLKKPFNRGIRRSKILLTTRSEKTASIVQTVHIYHLNQLSNEDCWSVFANHACLSSESNGNTTTLEKIGKEIVKKCNGLPLAAQSLGGMLRRKHDIVDWNNILNSDIWELSESECEVIPALRLSYHYLPPHLKRCFVYCSLYPQDYEFEKYELILLWMAEDLLKKSSKGRTLEEVGHEYFDDLVSRSFFQRSNTSRSSWPYGKCFVMHDLMHDLATSLGGDFYFRSEELGKETKINTKTRHLSFAKFNSSFLDKPDVVGRVKFLRTFLSIIKFE…
HK_NBARC_NBARC.Chr03.6	Chr03	TGFam.ISGAP	4020755	4029640	ATGGCTGCAGCAGTGGTAGGTGGTGCCTTTCTCTCTGCTTTCCTTGATGTGCTTTTCGAAAGGCTGGCTTCACCTGACTTTGTTCACTTGATCCTTGGAAAGAAGCTTAGCAAGAAGTTGCTTCAAAAGTTGGAGACCACTCTCAGAGTGGTTGGAGCTGTGCTTGATGATGCCGAGAAGAAACAGATCACAAACACCAATGTCAAACACTGGCTCAATGATCTCAAAGATGCTGTCTATGAAGCCGATGACTTACTCGACCATGTTTACACCAAAGCTGCCACCCAAAACAAGGTAAGAGACTTGTTTTCTCGCTTTTCCGATAGCAAGATCGTTAGTAAGTTGGAAGACATAGTTGTCAGACTTGAGTCTCATTTAAAACTCAAGGAGAGTCTTGAT…	MAAAVVGGAFLSAFLDVLFERLASPDFVHLILGKKLSKKLLQKLETTLRVVGAVLDDAEKKQITNTNVKHWLNDLKDAVYEADDLLDHVYTKAATQNKVRDLFSRFSDSKIVSKLEDIVVRLESHLKLKESLDLKESAVENLSWKAPSTSLEDGSHIYGREKDKEAIIKLLSEDNSDGSEVSVVPIVGMGGVGKTTLAQLVYNDENLKQIFDFKAWVCVTQEFDILKVTKTITEAVTGKSCKLNDLNLLHLELMDKLKDKEFLIVLDDVWTENYINWRLLKKPFNRGIRRSKILLTTRSEKTASIVQTVHIYHLNQLPNEDCWSVFANHACLSSESNGNTTTLEKIGKEIVKKCNGLPLAAQSLGGMLRRKHDIVDWNNILNSGIWELSESECEVIPAL…
HK_NBARC_NBARC.Chr03.7	Chr03	TGFam.ISGAP	4063346	4067161	ATGGCAGAAGCACTGGTAGGTGGTGCCTTTCTCTCTTCTTTCCTTAATGTGGTTTTCGACAGGCTGGCTACAAAGGAGTTTGTTGACTTGATCCGTGGAAAGAAGCTTAGCAAGAAGTTGCTTCAAAAGTTGGAGAACACTCTCAGAATGGTTGGAGCTGTGCTTGATGATGCCGAGAAGAAACAGATCACAAACACCAATGTCAAAGACTGGCTCAATGATCTCAAAGATGCTGTCTATGAAGCCGATGACTTACTCGACCATGTTTTCACCAAAGCTGCCACCCAAAACAAGGTAAGAAACTTTTTTTCTCGCTTTTCCGATAGGAAGATCGTTAGTAAGTTGGAGGACATAGTTGTCACACTTGAGTCTCATTTAAAACTCAAGGAGAGTCTTGAT…	MAEALVGGAFLSSFLNVVFDRLATKEFVDLIRGKKLSKKLLQKLENTLRMVGAVLDDAEKKQITNTNVKDWLNDLKDAVYEADDLLDHVFTKAATQNKVRNFFSRFSDRKIVSKLEDIVVTLESHLKLKESLDLKESAVENLSWKALSTSVEDGSHIYGREKDKQAIIKLLSEDNSDGSEVSVVPIVGMGGVGKTTLAQLVYNDENLKEIFDFKAWVCVSQEFDILKVTKTITEAVTGEPCILNDLNLLHLELMDKLKDKKFLIVLDDVWTENYVNWRLLKKPFNRGTRRSKILLTTRSEKTASIVQTVHIYHLNQLSNGDCWSVFANHACLSSESNENTTTLEKIGKEIVKKCNGLPLAAESLGGMLRRKHDIVDWNNILNSDIWELSESECEVIPAL…
HK_NBARC_NBARC.Chr03.8	Chr03	TGFam.AUG	4102575	4109177	ATGGCAGCAGCAGTGGTAGGTGGTGCCTTTCTCTCTGCTTTCCTTGATGTGCTTTTCGACAGGCTGGCTTCACCTGAGTTTGTTGACTTGATCCTTGGAAAGAAGCTTAGCAAGAAGTTGCTTCAAAAGTTGGAGACCACTCTCAGAGTGGTTGGAGCTGTGCTTGATGATGCCGAGAAGAAACAGATCACAAACACCAATGTCAAACACTGGCTCGATGATCTCAAAGATGCTGTCTATGAGGCCGATGACTTACTCGACCATGTTTTCACCAAAGCTGCCACCCAAAAGAAGGTAAGAAACTTTTTTTCTCGCTTTCCCGATAGGAAGATTGTTAGTAAGTTGGAGGACATAGTTGTCACACTTGAGTCTCATTTAAAACTCAAGGAGAGTCTTGAT…	MAAAVVGGAFLSAFLDVLFDRLASPEFVDLILGKKLSKKLLQKLETTLRVVGAVLDDAEKKQITNTNVKHWLDDLKDAVYEADDLLDHVFTKAATQKKVRNFFSRFPDRKIVSKLEDIVVTLESHLKLKESLDLKESAVENLSWKAPSTSVEDGSHIYGREKDKEAIIKLLSEDNSDGSEVSVVPIVGMGGVGKTTLAQLVYNDENLVEIFDFKAWVCISKEFDVLKITKTMIEAITGEPCKLNDLNLLHLELMDKLKDKKFLIVLDDVWTEDYVDWSLIKKPFNRGIRRSKILLTTRSEKTASIVQTVHTYHLNQLSNEDCWSVFANHACLSSESNENTTTLEKIGKEIVKKCNGLPLAAQSLGGMLRRKHDIVDWNNILNSNIWELSESECKVIPAL…
HK_NBARC_NBARC.Chr03.9	Chr03	TGFam.AUG	4198463	4200900	ATGGCAGCAGCAGTGGTAGGTGGTGCCTTTCTCTCTGCTTTCCTTGATGTGCTTTTCGACAGGCTGGCTTCACCTGAGTTTGTTGACTTGATCCTTGGAAAGAAGCTTAGCAAGAAGTTGCTTCAAAAGTTGGAGACCACTCTGAGAGTGGTTGGAGCTGTGCTTGATGATGCCGAGAAGAAACAGATCACAAACACCAATGTCAAACACTGGCTCAATGATCTCAAAGATGCTGTCTATGAAGCCGATGACTTACTCGACCATGTTTTCACCAAAGCTGCCACCCAAAACAAGGTAAGAAACTTTTTTTCTCGCTTTTCCAATAGGAAGATCGGTAGTAAGTTGGAGGACATAGTTGTCACACTTGAGTCTCATTTAAAACTCAAGGAGAGTCTTGAT…	MAAAVVGGAFLSAFLDVLFDRLASPEFVDLILGKKLSKKLLQKLETTLRVVGAVLDDAEKKQITNTNVKHWLNDLKDAVYEADDLLDHVFTKAATQNKVRNFFSRFSNRKIGSKLEDIVVTLESHLKLKESLDLKESAVENVSWKAPSTSLEDGSHIYGREKDKEAIIKLLSEDNSDGSEVSVVPIVGMGGVGKTTLPQLVYNDENLEEIFDFKAWVCVSQELDILKVTKTITEAVTGKPCKLNDLNLLHPELMDKLKDKEFLIVLDDVWTENYVNWRLLKKPFNRGIRRSKILLTTRSEKTASIVQTVHIYHLNQLSNEDCWSVFANHACLSSESNGNTTTLEKIGKEIVKKCNGLPLAAQSLGGMLRRKHDIVDWNNILNSDIWELSESECEVIPAL…
HK_NBARC_NBARC.Chr03.10	Chr03	TGFam.ISGAP	4260101	4263850	ATGGCTGCAGCACTGGTCGGTGGTGCCTTTCTCTCTGCTTTCCTTGATGTGCTTTTCGACAGGCTGGCTTCACCTGACTTTGTTGACCTGATCCGTGGAAAGAAGCTTAGCAAGAAGTTGCTTCAAAAGTTGGAGACCACTCTCAGAGTGGTTGGAGCTGTGCTTGATGATGCCGAGAAGAAACAGATCACAAACACCAATGTCAAACACTGGCTCAATGATCTCAAACATGCTGTCTATGAAGCCGATGACTTACTCGACCATGTTTTCACCAAAGCTGCCACCCAAAACAAGGTAAGAGACTTGTTTTCTCGCTTTTCCGATAGGAAGATCGTTAGTAAGTTGGAGGACATAGTTGTCACACTTGAGTCTCATTTAAAACTCAAGGAGAGTCTTGAT…	MAAALVGGAFLSAFLDVLFDRLASPDFVDLIRGKKLSKKLLQKLETTLRVVGAVLDDAEKKQITNTNVKHWLNDLKHAVYEADDLLDHVFTKAATQNKVRDLFSRFSDRKIVSKLEDIVVTLESHLKLKESLDLKESAVENLSWKAPSTSLEDGSHIYGREKDKEAIIKLLSEDNSDGREVSVVPIVGMGGVGKTTLAQLVYNDENLKQIFDFDFKAWVCVSQEFDVLKVTKTIIEAVTGKACKLNDLNLLHLELMDKLKDKKFLIVLDDVWTEDYVDWRLLKKPFNRGIIRRSKILLTTRSEKTASVVQTVHTYHLNQLSNEDCWSVFVNHACLSTESNENTATLEKIGKEIVKKCNGLPLAAESLGGMLRRKHDIGDWNNILNSDIWELSESECKVI…
HK_NBARC_NBARC.Chr03.11	Chr03	TGFam.ISGAP	4278685	4282446	ATGGCAGCAGCTCTGGTCGGTGGTGCCTTTCTCTCTGCTTTTCTTGATGTGCTTTTCGACAGGCTGGCTTCACCTGAGTTTGTTGACTTGATCCTTGGAAAGAAGCTTAGCAAGAAGTTGCTTCAAAAGTTGGAGACCACTCTCAGAGTGGTTGGAGCTGTGCTTGATGATGCCGAGAAGAAACAGATCACAAACACCAATGTCAAACACTGGCTCAATGATCTCAAAGATGCTGTCTATGAAGCCGATGACTTACTCGACCATGTTTTCACCAAAGCTGCCACCCAAAACAAGGTAAGAAACTTGTTTTCTCGCTTTTCCGATCGGAAGATCGTTAGTAAGTTGGAGGACATAGTTGTCACCCTAGAGTCTCATTTAAAACTCAAGGAGAGTCTTGAT…	MAAALVGGAFLSAFLDVLFDRLASPEFVDLILGKKLSKKLLQKLETTLRVVGAVLDDAEKKQITNTNVKHWLNDLKDAVYEADDLLDHVFTKAATQNKVRNLFSRFSDRKIVSKLEDIVVTLESHLKLKESLDLKESAVENLSWKAPSTSLEDGSHIYGREKDKEAIIKLLSEDNSDGSEVSVVPIVGMGGVGKTTLAQLVYNDENLKEKFDFDFKAWVCVSQEFDVLKVTKTIIEAVTGQPCKLNDLNLLHLELMDKLKDKKFLIVLDDVWTEDYVDWSLLKKPFQCGIIRRSKILLTTRSEKTASVVQTVQTYHLNQLSNEDCWSVFANHACLSSESNENTTLEKIGKEIVKKCDGLPLAAQSLGGMLRRKHDIGDWYNILNSDIWELSESECKVIP…
HK_NBARC_NBARC.Chr03.12	Chr03	TGFam.ISGAP	4538348	4542157	ATGGCTGCAGCACTGGTCGGTGGTGCCTTTCTCTCTGCTTTTCTTGATGTGGTTTTCGACAGGCTGGCTTCACCTGAGTTTGTTGACTTGATCCTTGGAAAGAAGCTTAGCAAGAAGTTGCTTCAAAAGTTGGAGACCACTCTCAGAGTGGTTGGAGCTGTGCTTGATGATGCCGAGAAGAAACAGATCACAAACACCAATGTCAAACACTGGCTCAATGATCTCAAACATGCTGTCTATGAAGCCGATGACTTACTCGACCATGTTTTCACCAAAGCTGCCACCCAAAACAAGGTAAGAAACTTGTTTTCTCGCTTTTCCGATCGGAAGATCGTTAGTAAGTTGGAGGACATAGTTGTCACCCTAGAGTCTCATTTAAAACTCAAGGAGAGTCTTGAT…	MAAALVGGAFLSAFLDVVFDRLASPEFVDLILGKKLSKKLLQKLETTLRVVGAVLDDAEKKQITNTNVKHWLNDLKHAVYEADDLLDHVFTKAATQNKVRNLFSRFSDRKIVSKLEDIVVTLESHLKLKESLDLKESAVENLSWKAPSTSLEDGSHIYGREKDKEAIIKLLSEDNSDGSEVSVVPIVGMGGVGKTTLAQLVYNDENLKEKFDFDFKAWVCVSQEFDVLKVTKTIIEAVTGQPCKLNDLNLLHLELMDKLKDKKFLIVLDDVWTEDYVDWSLLKKPFQCGIIRRSKILLTTRSEKTASVVQTVQTYHLNQLSNEDCWSVFANHACLSSESNENTTLEKIGKEIVKKCDGLPLAAQSLGGMLRRKHDIGDWYNILNSDIWELSESECKVIP…
HK_NBARC_NBARC.Chr03.13	Chr03	TGFam.ISGAP	4588622	4592299	ATGGCAGCAGCAGTGGTAGGTGGTGCCTTTCTCTCTGCTTTCCTTGATGTGGTTTTCGACAGGCTGGCTTCACCAGACTTTGTTGACTTGATCCGTGGAAAGAAGCTTAGCAAGAAGTTGCTTCAAAAGTTGGAGACCACTCTCAGAGTGGTTGGAGCTGTGCTTGATGATGCCGAGAAGAAACAGATCACAAACACCAATGTCAAACACTGGCTCAATGATCTCAAAGATGCTGTCTATGAAGCCGATGACTTACTCGACCATGTTTTCACCAAAGCTGCCACCCAAAACAAGGTAAGAGACTTGTTTTCTCGCTTTTCTGATAGGAAGATCGTTAGTAAGTTGGAAGACATAGTTGTCAGACTTGAGTCTCATTTAAAACTCAAGGAGAGTCTTGAT…	MAAAVVGGAFLSAFLDVVFDRLASPDFVDLIRGKKLSKKLLQKLETTLRVVGAVLDDAEKKQITNTNVKHWLNDLKDAVYEADDLLDHVFTKAATQNKVRDLFSRFSDRKIVSKLEDIVVRLESHLKLKESLDLKESAVENLSWKAPSTSLEDGSHIYGREKDKQAIIKLLTEDDSDGREVSVVPIVGMGGVGKTTLAQLVYNDENLEEIFDFKAWVCVSQEFDILKVTKAIIEAVTGKPCNLNDLNLLHLELMDKLKDKKFLIVLDDVWTEDYVDWSLLKKPFNRGIRRSKILLTTRSEKTASVVQTVHTYHLNQLSNEDCWSVFANHACLSSESNENTEILEKIGKEIVKKCNGLPLAAQSLGGMLRRKHDIRDWNNILNSDIWELSESECKVIPAL…
HK_NBARC_NBARC.Chr03.14	Chr03	TGFam.AUG	4625894	4629188	ATGTCCAACAGAGAGGAGAAAGATAAGAAGGCCATAATCAAGTTGTTGTCGGAGGATAACAGTGAAGGTAGTGAAGTGTCTGTGGTTCCTATTGTGGGCATGGGTGGGGTTGGAAAAACTACTTTGGCCCAATTGGTGTACAATGATGAGAATTTGAAACAGATATTTGGTTTTGATTTTAAGGCATGGGTTTGTGTTTCTCAAGAATTTGATGTTCTGAAGGTCACAAAAACTGTAATAGAGGCTTTTACTGGAGAGCCCTGTAAATTGAATGATCTGCATCTACTTCATCTTGAATTGATGGACAAGCTAAGAGATAAAAAATTCTTAATTGTTTTGGATGATGTTTGGACAGAGGATTATGTTGATTGGAGTCTTCTTAAGAAACCATTTAACCGT…	MSNREEKDKKAIIKLLSEDNSEGSEVSVVPIVGMGGVGKTTLAQLVYNDENLKQIFGFDFKAWVCVSQEFDVLKVTKTVIEAFTGEPCKLNDLHLLHLELMDKLRDKKFLIVLDDVWTEDYVDWSLLKKPFNRGIRRSKILLTTRSEKTASVVQTLQTYHLNQLSNEDCWSVFANHACLSTESNENTATLEKIGKEIVKKCNGLPLTAQSLGGMLRRKHDIGDWNNILNSDIWELSESECKVIPALRLSYHYLPPHLKRCFVYCSLYPQDYEFEKNELIWLWMAEDLLKKPRKGRTLEEIGHEYFDDLVSRSFFHRSSTNRSSWPHGKCFVMHDLMHDLATSLGGDFYFRSEELGKETKINTKTRHLSFAKFNSSVLDNFDAVGRVKFLRTFLSIINFE…
HK_NBARC_NBARC.Chr03.15	Chr03	TGFam.PM	4823655	4826525	ATGGCAGCAGCACTGGTCGGTGGTGCCTTTCTCTCTGCTTTCCTTGATGTGCTTTTCGACAGGCTGGCTTCACCTGAGTTTGTTGACCTGATCCGTGGAAAGAAGTTTAGCAAGAAGTTGCTTCAAAAGTTGGAGACCACTCTCAGAGTGGTTGGAGCTGTGCTTGATGATGCCGAGAAGAAACAGATCACAAACACCAATGTCAAACACTGGCTCAATGATCTCAAAGATGCTGTCTATGAAGCCGATGACTTACTCGACCATGTTTTCACCAAAGCTGCCACCCAAAACAAGGTAAGAGACTTGTTTTCTCGCTTTTCCGATAGGAAGATCGTTAGTAAGTTGGAGGACATAGTTGTCACCCTAGAGTCTCATTTAAAACTCAAGGAGAGTCTTGAT…	MAAALVGGAFLSAFLDVLFDRLASPEFVDLIRGKKFSKKLLQKLETTLRVVGAVLDDAEKKQITNTNVKHWLNDLKDAVYEADDLLDHVFTKAATQNKVRDLFSRFSDRKIVSKLEDIVVTLESHLKLKESLDLKESAVENLSWKAPSISLEDGSHIYGREKDKEAIIKLLSEDNSDGSEVSVVPIVGMGGVGKTTLAQLVYNDENLKQKFNFDFKAWVCVSQEFDVLKVTKTIIEAVTGKPCKLNDLNLLHLELMDKLKDKKFLIVLDDVWTEDYVDWSLLKKPFNRGIRRSKILLTTHSEKTASIVQTVHTYHLNQLSNEDCWSVFANHACLSSESNKNTTTLEKIGKEIVKKCNGLPLAAQSLGGMLRRKHDIGDWNNILNNDIWDLYEGECKVIP…
HK_NBARC_NBARC.Chr03.16	Chr03	TGFam.ISGAP	4867097	4870878	ATGGCAGCAGCGCTGGTCGGTGGTGCCTTTCTCTCTGCTTTCCTTGATGTGCTTTTCGACAGGCTGGCTTCACCTGAGTTTGTTGACCTGATCCGTGGAAAGAAGTTTAGCAAGAAGTTGCTTCAAAAGTTGGAGACCACTCTCAGAGTGGTTGGAGCTGTGCTTGATGATGCCGAGAAGAAACAGATCACAAACACCAATGTCAAACACTGGCTCAATGATCTCAAAGATGCTGTCTATGAAGCCGATGACTTACTCGACCATGTTTTCACCAAAGCTGCCACCCAAAACAAGGTAAGAGACTTGTTTTCTCGCTTTTCCGATAGGAAGATCGTTAGTAAGTTGGAGGACATAGTTGTCACCCTAGAGTCTCATTTAAAACTCAAGGAGAGTCTTGAT…	MAAALVGGAFLSAFLDVLFDRLASPEFVDLIRGKKFSKKLLQKLETTLRVVGAVLDDAEKKQITNTNVKHWLNDLKDAVYEADDLLDHVFTKAATQNKVRDLFSRFSDRKIVSKLEDIVVTLESHLKLKESLDLKESAVENLSWKAPSTSLEDGSHIYGREKDKEAIIKLLSEDNSDGSEVSVVPIVGMGGVGKTTLAQLVYNDENLKQKFNFDFKAWVCVSQEFDVLKVTKTIIEAVTGKPCKLNDLNLLHLELMDKLKDKKFLIVLDDVWTEDYVDWSLLKKPFNRGIRRSKILLTTRSEKTASIVQNVHTYHLNQLSNEDCWSVFANHACLSSESNKNTTTLEKIGKEIVKKCNGLPLAAQSLGGMLRRKHDIGDWNNILNNDIWDLSEGECKVIP…
HK_NBARC_NBARC.Chr03.17	Chr03	TGFam.ISGAP	4914821	4918561	ATGGCAGAAGCACTGGTAGGTGGTGCCTTTCTCTCTTCTTTCCTTAATGTGGTTTTCGACAGGCTGGCTACAAAGGAGTTTGTTGACTTGATCCGTGGAAAGAAGCTTAGCAAGAAGTTGCTTCAAAAGTTGGAGAACACTCTCAGAATGGTTGGAGCTGTGCTTGATGATGCCGAGAAGAAACAGATCACAAACACCAATGTCAAACACTGGCTCAATGATCTCAAAGATGCTGTCTATGAAGCCGATGACTTACTCGACCATGTTTTCACCAAAGCTGCCACCCAAAAGAAGGTAAGAAACTTTTTTTCTCGCTTTTCCGATAGGAAGATCGTTAGTAAGTTGGAGGACATAGTTGTCACACTTGAGTCTCATTTAAAACTCAAGGAGAAACTTGAT…	MAEALVGGAFLSSFLNVVFDRLATKEFVDLIRGKKLSKKLLQKLENTLRMVGAVLDDAEKKQITNTNVKHWLNDLKDAVYEADDLLDHVFTKAATQKKVRNFFSRFSDRKIVSKLEDIVVTLESHLKLKEKLDLKESAVENLSWKALSTSVEDGSHIYGREKDKQAIIKLLSEDNSDGSEVSVVPIVGMGGVGKTTLAQLVYNDENLKEIFDFKAWVCVSQEFDILKVTKTITEAVTGKPCILNDLNLLHLELMDKLKDKKFLIVLDDVWTENYVNWRLLKKPFNRGIRRSKILLTTRSEKTASIVQTVHTYHLNQLSNEDCWSVFANHACLSSESNGNTTALEKIGKEIVKKCNGLPLAAQSLGGMLRRKHDIVDWNNILNSDIWELSESECEVIPAL…
HK_NBARC_NBARC.Chr03.18	Chr03	TGFam.PM	5472636	5481486	ATGGCTGAGGCAGTTGGTGGTGCATTCCTCTCTGCTTTCCTTGATGTTGTGTTCGACAAGCTGTCTGCAGATGAGGTTGTTGACTTCATCCGTGGAAAGAAGCTTGACCTCAATTTGCTTGAGAACTTGAAGAGCACTCTGAGAGTGGTTGGAGCTGTGCTTGATGATGCTGAGAAGAAACAAATCAAACTCTCCAGTGTCAACCAGTGGCTCATCGAACTCAAAGATGCTCTCTATGATGCCGATGACTTGCTGGATGAAATTTCTACCAAATCTGCAACTCAAAAGAAGGTATGTAAAGTGCTTTCTCGCTTTACTGATAGGAAAATGGCCAGTAAGTTGGAAAAAATAGTTGACAAATTAGATAAAGTTTTAGGAGGCATGAAGGGTCTTCCTTTG…	MAEAVGGAFLSAFLDVVFDKLSADEVVDFIRGKKLDLNLLENLKSTLRVVGAVLDDAEKKQIKLSSVNQWLIELKDALYDADDLLDEISTKSATQKKVCKVLSRFTDRKMASKLEKIVDKLDKVLGGMKGLPLQVMAGEMSELWNTQPTTSLEDGYGMYGRDTDKEAIMKLLSDDSSDGVQVSVIAIVGMGGVGKTTLARSVFNNDNLKQMFDLNAWVCVSDQFDIVKVTKTMIEQITQESCKLNDLNLLQLELMDKLKVKKFLIVLDDVWIEDYDNWSNLTKPFLHGTRGSKILLTTRNENVVNVVPYHIVQVYPLSKLSNEDCWLVFANHAFPPSESSGEDRRALEKIGMEIVKKCNGLPLAARSLGGMLRRKHAIRDWNNILESDIWKLPESQCKI…
HK_NBARC_NBARC.Chr03.19	Chr03	TGFam.AUG	5491526	5494805	ATGGCTGAGGCAGTTGGTGGTGCGTTTCTCTCTGCTTTCCTTGATGTTGTGTTCGACAAGCTGGTCACCGATGAGGTTGTTGACTTCATCCGTGGAAAGAAGCTTGACCTCAATTTGCTTGAGAACTTGAAGACCACTCTGAGACTGGTTGGAGCTGTGCTTGACGATGCTGAGAAGAAACAAATCAAACTCTCCAGTGTCAACCAGTGGCTCATTGAGCTCAAAGATGCTCTCTATGAGGCCGATGACTTGCTGGATGAAATTTCTACCAAATCTGCAACTCAAAAGAAGGTTAGTAAAGTGTTTTCTCGCTTTACCGATAGGAAAATGGCCAGTAAGTTGGAAAAAGTAGTTGGCAAATTAGATAAAGTTCTAGAAGGCATGAAGGGTCTTCCTTTG…	MAEAVGGAFLSAFLDVVFDKLVTDEVVDFIRGKKLDLNLLENLKTTLRLVGAVLDDAEKKQIKLSSVNQWLIELKDALYEADDLLDEISTKSATQKKVSKVFSRFTDRKMASKLEKVVGKLDKVLEGMKGLPLQVMAGESNESWNAQPTTSLEDGYGMYGRDTDKEAIMRLLLEDSSDGVQVSVTAIVGMVGVGKTTLARSVFNDGNLKQMFDLNAWVCVSDQFDILKVTQTMIEQVTHESCKLNDLNLLQLELMDKLKSKKFLIILDDVWIQDYDSWSNLTKPFLHGIRGSKILLTTGNENVVNVAPYHIVQVYPLSKLSNEDCWLVFANHAFPLSESSGEDRRALEKIGREIVKKCNGLPLAARSLGVCNIIPALRISYHYLPPHLKRCFVYCSLYP…
HK_NBARC_NBARC.Chr03.20	Chr03	TGFam.ISGAP	5515481	5516941	ATGGCTGAGGCAGTTGGTGGTGCATTCCTCTCTGCTTTCCTTGATGTTGTGTTCGACAAGCTGTCTACAGATGAGGTTGTTGACTTCATCCGTGGAAAGAAGCTTGACCTCAATTTGCTTGAGAACTTGAAGACCACTCTGAGAGTGGTTGGAGCTGTGCTTGATGATGCTGAGAAGAAACAAATCAAACTCTCCAGTGTCAACCAGTGGCTCATTGAGGTCAAAGATGCTCTCTATGAGGCCGATGACTTGCTGGATGAAATTTCTACCAAATCTGCAACTCAAAAGAAGGTAAGTAAAGTGCTTTCTCGCTTTACTGATAGGAAAATGGCCAGTAAGTTGGAAAAAATAGTTGACAAATTAGATAAAGTTTTAGGAGGCATGAAGGGTCTTCCTTTG…	MAEAVGGAFLSAFLDVVFDKLSTDEVVDFIRGKKLDLNLLENLKTTLRVVGAVLDDAEKKQIKLSSVNQWLIEVKDALYEADDLLDEISTKSATQKKVSKVLSRFTDRKMASKLEKIVDKLDKVLGGMKGLPLQVMAGEMNESWNTQPTTSLEDGYGMYGRDTDKEGIMKLLLSDDSSDGVLVSVIAIVGMGGVGKTTLARSVFNNENLKQMFDLNAWVCVSDQFDIVKVTKTMIEQITQESCKLNDLNLLQLELMDKLKVKKFLIVLDDVWIEDYENWSNLTKPFLHGKRGSKILLTTRNANVVNVVPYHIVQVYPLSKLSNEDCWLVFANHAFPPSESSGEDRRALEEIGREIVKKCNGLPLAARSLGGMLRRKHAIRDWNNILESDIWELPESQCK…
HK_NBARC_NBARC.Chr03.21	Chr03	TGFam.ISGAP	5530698	5534426	ATGGCTGAGGCAGTTGGTGGTGCATTTCTCTCTGCTTTCCTTGATGTTGTGTTCGAGAAGCTGGTCACAGATGAGGTTGTTGACTTCATCCGTGGAAAGAAGATTGATCTCAATTTGCTTGAGAACTTGAAGAGCACTCTAAGAGTGGTTGGAGCTGTGCTTGATGATGCTGAGAAGAAACAAATCAAACTCTCCAGTGTCAACCAGTGGCTCATTGAGCTCAAAGATGTTCTCTATGAGGCCGATGACTTGCTGGATGAAATTTCTACCAAATCTGCAACTCAAAAGAAGGTAATTAAAGTGTTTTCTCGCTTTACTGATAGGAAAATGGCCAGTAAGTTGGAAAAAGTAGTTGGCAAATTAGATAAAGTTCTAGAAGGCATGAAGGGTCTTCCTTTG…	MAEAVGGAFLSAFLDVVFEKLVTDEVVDFIRGKKIDLNLLENLKSTLRVVGAVLDDAEKKQIKLSSVNQWLIELKDVLYEADDLLDEISTKSATQKKVIKVFSRFTDRKMASKLEKVVGKLDKVLEGMKGLPLQVMAGESNESWNAQPTTSLEDGYGMYGRNTDKEAIMRLLLEDSSDGVQVSVTAIVGMGGVGKTTLARSVFNDSNLKQMFDLNAWVCVSDQFDIVKVTQTMIEQLTHESCKLNDLNLLQLELMDKLKNKKFLIILDDVWIQDYESWSNLTKPFLHGIRGSKILLTTRNENVVNVVPYHIVQVHPLSKLSNEDCWLVFANHAFPSSGSGEEDRRALEKIGREIVKKCNGLPLAARSLGGMLRRKHAIRDWNNILESDIWELPESQCKI…
HK_NBARC_NBARC.Chr03.22	Chr03	TGFam.ISGAP	5556902	5560630	ATGGCTGAGGCAGTTGGTGGTGCATTCCTCTCTGCTTTCCTTGATGTTGTGTTCGACAAGCTGTCTACAGATGAGGTTGTTGACTTCATCCGTGGAAAGAAGCTTGACCTCAATTTGCTTGAGGACTTGAAGACCACTCTGAGAGTGGTTGGAGCTGTGCTTGATGATGCTGAGAAGAAACAAATCAAACTCTCCAGTGTCAACCAGTGGCTCATTGAGGTCAAAGATGCTCTCTATGAGGCCGATGACTTGCTGGATGAAATTTCTACCAAATCTGCAACTCAAAAGAAGGTAAGTAAAGTGCTTTCTCGCTTTACTGATAGGAAAATGGCCAGTAAGTTGGAAAAAATAGTTGACAAATTAGATAAAGTTTTAGGAGGCATGAAGGGTCTTCCTTTG…	MAEAVGGAFLSAFLDVVFDKLSTDEVVDFIRGKKLDLNLLEDLKTTLRVVGAVLDDAEKKQIKLSSVNQWLIEVKDALYEADDLLDEISTKSATQKKVSKVLSRFTDRKMASKLEKIVDKLDKVLGGMKGLPLQVMAGEMNESWNTQPTTSLEDGYGMYGRDTDKEAIMKLLLSDDSSDGVLVSVIAIVGMGGVGKTTLARSVFNNENLKQMFDLNAWVCVSDQFDIVKVTKTMIEQITQESCKLNDLNLLQLELMDKLKVKKFLIVLDDVWIEDYDNWSNLTKPFLHGTRGSKILLTTRNENVVNVVPYHIVQVYPLSKLSNEDCWLVFANHAFPPSESSGEDRRALEKIGMEIVKKCNGLPLAARSLGGMLRRKHAIRDWNNILESDIWKLPESQCK…
HK_NBARC_NBARC.Chr03.23	Chr03	TGFam.ISGAP	5576889	5579652	GTTTATTTTGGTGGTGCATTCCTCTCTGCTTTCCTTGATGTTGTGTTCGACAAGCTGTCTACAGATGAGGTTGTTGACTTCATCCGTGGAAAGAAGCTTGACCTCAATTTGCTTGAGGACTTGAAGACCACTCTGAGAGTGGTTGGAGCTGTGCTTGATGATGCTGAGAAGAAACAAATCAAACTCTCCAGTGTCAACCAGTGGCTCATTGAGGTCAAAGATGCTCTCTATGAGGCCGATGACTTGCTGGATGAAATTTCTACCAAATCTGCAACTCAAAAGAAGGTAAGTAAAGTGCTTTCTCGCTTTACTGATAGGAAAATGGCCAGTAAGTTGGAAAAAATAGTTGACAAATTAGATAAAGTTTTAGGAGGCATGAAGGGTCTTCCTTTGCAAGTG…	VYFGGAFLSAFLDVVFDKLSTDEVVDFIRGKKLDLNLLEDLKTTLRVVGAVLDDAEKKQIKLSSVNQWLIEVKDALYEADDLLDEISTKSATQKKVSKVLSRFTDRKMASKLEKIVDKLDKVLGGMKGLPLQVMAGETSESWNTQPTTSLEDSDGVLVSVIAIVGMGGVGKTTLARSVFNNDNLKQMFDLNAWVCVSDQFDIVKVTKTMIEQITQESCKLNDLNLLQLELMDKLKVKKFLIVLDDVWIEDYENWSNLTKPFLHGKRGSKILLTTRNANVVNVVPYHIVQVYPLSKLSNEDCWLVFANHAFPPSESSGENRRALEEIGREIVKKCNGLPLAARSLGGMLRRKHAIRDWNNILESDIWELPESQCKIIPALRISYQYLPPHLKRCFVYCSL…
HK_NBARC_NBARC.Chr03.24	Chr03	TGFam.PM	5585116	5588840	ATGGCTGAGGCAGTTGGTGGTGCGTTTCTCTCTGCTTTCCTTGATGTTGTGTTCGACAAGCTGGTCACCGATGAGGTTGTTGACTTCATCCGTGGAAAGAAGCTTGACCTCAATTTGCTTGAGAACTTGAAGACCACTCTGAGACTGGTTGGAGCTGTGCTTGACGATGCTGAGAAGAAACAAATCAAACTCTCCAGTGTCAACCAGTGGCTCATTGAGCTCAAAGATGCTCTCTATGAGTCCGATGACTTGCTGGATGAAATTTCTACCAAATCTGCAACTCAAAAGAAGGTTAGTAAAGTGTTTTCTCGCTTTACCGATAGCAAAATGGCCAGTAAGTTGGAAAAAGTAGTTGGCAAATTAGATAAAGTTCTAGAAGGCATGAAGGGTCTTCCTTTG…	MAEAVGGAFLSAFLDVVFDKLVTDEVVDFIRGKKLDLNLLENLKTTLRLVGAVLDDAEKKQIKLSSVNQWLIELKDALYESDDLLDEISTKSATQKKVSKVFSRFTDSKMASKLEKVVGKLDKVLEGMKGLPLQVMAGESNESWNAQPTTSLEDGYGMYGRDTDKEAIMRLLLEDSSDGVQVSVTAIVGMVGVGKTTLARSVFNDGNLKQMFDLNAWVCVSDQFDILKLKSKKFLIILDDVWIQDYDSWSNLTKPFLHGIRGSKILLTTRNENVVNVAPYHIVQVYPLSKLSNEDCWLVFANHAFPLSESSGEDRRALEKIGREIVKKCNGLPLAARSLGVCNIIPALRISYHYLPPHLKRCFVYCSLYPKDYEFKKNDLILLWMAEDLLKLPNRGKAL…
HK_NBARC_NBARC.Chr03.25	Chr03	TGFam.AUG	5601839	5608389	ATGTATGGTAGGGATACAGACAAGGAGGGCATAATGAAGTTGTTGTTGTCAGATGATAGCAGTGATGGTGTACTAGTGTCTGTGATCGCTATTGTAGGCATGGGTGGGGTTGGAAAAACCACTTTAGCCCGATCTGTGTTCAACAATGAGAATTTGAAGCAGATGTTTGATTTAAATGCATGGGTTTGTGTTTCTGATCAATTTGATATTGTTAAGGTCACAAAAACTATGATAGAGCAAATCACGCAAGAGTCATGTAAATTGAATGATCTAAACTTGCTTCAACTTGAATTGATGGACAAACTGAAAGTTAAAAAATTCTTAATTGTCTTGGATGATGTATGGATCGAGGATTATGAGAATTGGAGTAATCTTACAAAACCATTTCTACATGGAAAA…	MYGRDTDKEGIMKLLLSDDSSDGVLVSVIAIVGMGGVGKTTLARSVFNNENLKQMFDLNAWVCVSDQFDIVKVTKTMIEQITQESCKLNDLNLLQLELMDKLKVKKFLIVLDDVWIEDYENWSNLTKPFLHGKRGSKILLTTRNANVVNVVPYHIVQVYPLSKLSNEDCWLVFANHAFPPSESSGEDRRALEEIGREIVKKCNGLPLAARSLGGMLRRKHAIRDWNNILESDIWELPESQCKIIPALRISYQYLPPHLKRCFVYCSLYPKDYEFQKKDLILLWMAEDLLKLPNRGKALEVGDEYFDDLVSRSFFQRSSNQTWGNYFVMHDLVHDLALYLGGEFYFRSEELGKETKIGIKTRHLSVTKFSDPISDIEVFDRLQFLRTLLAIDFKDSSFNK…
HK_NBARC_NBARC.Chr03.26	Chr03	TGFam.ISGAP	5755303	5761715	ATGGCAGCAGCAGTGGTAGGTGGTGCGTTCCTCTCTGCTTTCCTTGATGTTGTTTTTGACAGGCTGGCTTCACCTGAATTTGTCAACTTGATCCATGGAAAGAAGCTTAGCAAGAAGTTGCTTCAAAAGTTGGAGACCATTCTAAGAGTGGTTAGAGCTGTGCTTGATGATGCTGAGAAGAAACAGATCAAAGACTCTAATGTCAAACACTGGCTCAATGATCTCAAAGATGCTGTTTATCAGGCAGATGACTTACTCGATGAAGTTTCCACCAAAGCTGCTACTCAAAAGCATGTAAGCAACTTGTTCTTTCGCTTTTCCAATAGGAAGCTCGTTAGTAAGTTGGAAGACATAGTTGAAAGACTAGAGTCTGTTTTAAGATTCAAGGAGAGTTTTGAT…	MAAAVVGGAFLSAFLDVVFDRLASPEFVNLIHGKKLSKKLLQKLETILRVVRAVLDDAEKKQIKDSNVKHWLNDLKDAVYQADDLLDEVSTKAATQKHVSNLFFRFSNRKLVSKLEDIVERLESVLRFKESFDLKDIAVENVSWKAPSTSLEDGSYIYGRDKDKEAIIKLLLEDNSHGKEVSVIPIVGMGGVGKTTLAQLVYNDENLNQIFDFKAWVCVSEEFNILKVTKTIAEAVTREPCKLNDMNLLHLDLMDKLKDKKFLIVLDDVWTEDYVNWGLLKKPFQCGIRGSKILLTTRNENTAFVVQTVQPYHLKQLSNEDCWLVFANHACLSSEFNKNTSALEKIGREIAKKCNGLPLAAQSLGGMLRKRHDIGYWDNILNSEIWELSESECKIIPAL…
HK_NBARC_NBARC.Chr03.27	Chr03	TGFam.ISGAP	5851446	5855132	ATGGCTGAGTTAGTTGGTGGTGCGTTTCTCTCTGCTTTCCTCAATGTTGTGTTCGACAAGCTTGCTACCGATGAGGTTGTTGACTTCTTCCGTGGAAAGAAGGTTGACCTCAATTTGCTGGAGAACTTGAAGAGCACTCTGAGAGTGGTTGGAGGTGTGCTTGATGATGCTGAGAAGAAACAAACCAAACTCTCCAGTGTCAACCAGTGGCTCATTGAGCTCAAGGATGTTCTTTATGATGCCGATGACATGCTGGATGAAATTTCGACCAAAGCTGCAACTCAAAAGAAGGTACGTAAAGTGTTTTCTCGCTTTACCAATAGGAAAATGGCCAGTAAGTTGGAAAAAGTAGTTGGGAAATTAGATAAAGTTCTAGAAGGCATGAAGGGTCTTCCTTTG…	MAELVGGAFLSAFLNVVFDKLATDEVVDFFRGKKVDLNLLENLKSTLRVVGGVLDDAEKKQTKLSSVNQWLIELKDVLYDADDMLDEISTKAATQKKVRKVFSRFTNRKMASKLEKVVGKLDKVLEGMKGLPLQVMAGESNEPWNALPTTSLEDGYGMHGRDTDKEAIMKLVKDSSDGVPVSVIAIVGMGGVGKTTLARSVFNDGNLKEMLFDLNAWVCVSDQFDIVKVTKTMIEQITQKSCKLNDLNLLQHELMDKLKDKKFLIVLDDVWIEDYDNWSNLTKPFLHGTRGSKILLTTRNENVANVVPYRIVQVYPLSKLSNEDCWLVFANHAFPLSESSGEDRRALEKIGREIVKKCNGLPLAAQSLGGMLRRKHAIRDWNNILESDIWELPESQCKI…
HK_NBARC_NBARC.Chr03.28	Chr03	TGFam.AUG	5890821	5893812	ATGAGAGTTGAACCCCTTACTATAAACTTCCAACTAAGAGAGCAAATAGTAATATTGCCGTTAATTTTCATACATTTTCTTTCACATTCTCTGTTATATAGGAATGATGCTGAGCTGCTTGAAGATATCATTGATCATGTGTTGAAGAGGTTGAATAAGAAGCCAATTAATAACTCAAAAGGACTTATTGGAATTGACAAACCGATTGCAGATTTAGAATCATTGTTACGTCAAGAGTCAAAAGATGTACGCGTTATTGGAATTTGGGGTATGCATGGTATCGGCAAGACAACTATTGTAGAAGAATTATTTAACAAACAATGTTTTGAGTATGAAAGTTGTTGTTTTTTGGCAAAGGTAAACGAAGAATTAGAAAGGCATGGCGTAATTTGTGTAAAA…	MRVEPLTINFQLREQIVILPLIFIHFLSHSLLYRNDAELLEDIIDHVLKRLNKKPINNSKGLIGIDKPIADLESLLRQESKDVRVIGIWGMHGIGKTTIVEELFNKQCFEYESCCFLAKVNEELERHGVICVKEKLLSTLLTEDVKINTTNGLPNDILRRIGRMKIFIVLDDVNDYDQVEKLVGTLDWLGSGSRIIITARDRQILHNKVDDIYEIGSLSIDEAGELFCLNAFNQSPLGEEYWDYLLLSYWMVDYAKGVPLVLKVLGQLLRGKDKEVWKSQLDKLQKMPNKKVHDIMKPSYYDLDRKEKNIFLDIACFFNGLNLKVDYLNLLLRDHENDNSVAIGLERLKDKSLITISEDNTVSMHNIVQEMGREIAHEESSEDLGSRSRLSDADEIYEV…
HK_NBARC_NBARC.Chr03.29	Chr03	TGFam.ISGAP	5912016	5923920	ATGGCAAACTCTTCTTCCGGAGCTTCGGCAATAAAATATGTTCTTTTTCATTGTTTCTTTATTATTTCCGGACTGATGGATGTGGCCTCCAAGCAAATGCCAGATTATGTTCCTCAAATAAAATATGATGTGTTTGTGAACTTTAGGGGCGACGACATCCGTCGAGATTTTCTTGGTCATTTGACTAAGGAATTTTGTCGAAAGCAAATTCATGCCTTTGTAGATGATAAACTTAAGACTGGAGACGAACTATGGCCATCATTTGTTGAAGCAATTCAAGGATCATTGATTTCGTTGACCATATTATCTGAAAACTATGCTTCTTCATCCTGGAGTTTGAATGAACTTGTGACAATACTTGAGTGCAGGGAGAAATACAATCGAATAGTGATACCTGTT…	MANSSSGASAIKYVLFHCFFIISGLMDVASKQMPDYVPQIKYDVFVNFRGDDIRRDFLGHLTKEFCRKQIHAFVDDKLKTGDELWPSFVEAIQGSLISLTILSENYASSSWSLNELVTILECREKYNRIVIPVFYKVYPTDVRHQNGSYKSDFAEHEKKYNLATVQNWRHALSKAANLSGIKSFNYKTEVELLEKITESVNLELRRLRNHPHNLKGVIGIEKPIQSLESLIRQKSINVNVIGIWGMGGIGKTTIAEAMFNKLYSEYNASSFLANMKEEYGRRGIISLREKLFSTLLVENEKMNEANGLSEYIVRRIAGMKVLIVLDDVNHSDLLEELFGDHHWFGAGSTIIITSRDKQVLIANKVDDIYEVGALNSSQALELFSLYAFKKNHFDMEYDE…
HK_NBARC_NBARC.Chr03.30	Chr03	TGFam.ISGAP	5934482	5941602	ATGGCAAATTCTTCTTCCGGAGCTTCTCAAATAAAATATGTTGTTCTTCTTCTTTGTGATCTTTTGCTTATCTCAGGATTGACGGGTGAAATATCAGATAATATTCCTCAAATAAAGTATGATGTTTTTGTTAGCTTCAGGGGCGAGGACATCCGTCACGGTTTTCTTGGTTATTTGACTGAGGCTTTTCATCAAAAGCAGATACATGCCTTCATAGATGATAAACTTGAGAAGGGAGATGAAATATGGCCATCACTTGTTGGAGCAATTCAAGGATCATTGATTTCCTTGACCATATTCTCTGAAAACTACTCCTCTTCGCGTTGGTGTCTCGAAGAACTTGTGAAAATAATTGAGTGCAGGGAGGCATATGGACAAACTGTGATACCTGTTTTCTTC…	MANSSSGASQIKYVVLLLCDLLLISGLTGEISDNIPQIKYDVFVSFRGEDIRHGFLGYLTEAFHQKQIHAFIDDKLEKGDEIWPSLVGAIQGSLISLTIFSENYSSSRWCLEELVKIIECREAYGQTVIPVFFHVNPTDVRHQKGSYEKALSEHEKKYNLTTVQNWRHALKKAADLSGIKSFDYKTEVELLGEIINIVNLELMRLDKNPVSLKGLIGIDRSIQYLESMLQHESSNVRVIGIWGMGGIGKTTIAQEILNKLCSGYDGYCFFVNVKEEIRRHGIITLKEIFFSTLLQENVKMITANGLPNYIKRKIGRMKVLIVLDDVNDSDLLEKLFGNHDWFGPGSRIILTTRDKQVLIANKVHVDDIYQVGVLNPSEALELFILHAFNQKHFDMEYYK…
HK_NBARC_NBARC.Chr03.31	Chr03	TGFam.ISGAP	5954875	5963160	ATGGCATATTCTTCTTCCGGAGCTTCTCAAATAAAATATGTTGTTCATCTTCTTTGTGATCTCTTGCTTATCTCAGGATTGACGGGTGAAATATCAGTGCAAATATCAGATAATATTCCTCAAATAAAGTATGATGTTTTTGTTAGCTTCAGGGGTGAGGACATCCGTCACGGTTTTCTTGGTTATTTGACTGAGGCTTTTCGTCAAAAGCAGATACATGCCTTCATAGATGATAAACTTGAGAAGGGAGATGAAATATGGTCATCACTTGTTGGAGCAATTCAAGGATCATTGATTTCCTTGACCATATTCTCTGAAAACTACTCCTCTTCGCGTTGGTGTCTCGAAGAACTTGTGAAAATAATTGAGTGCAGGGAGACATATGGACAAACTGTGATA…	MAYSSSGASQIKYVVHLLCDLLLISGLTGEISVQISDNIPQIKYDVFVSFRGEDIRHGFLGYLTEAFRQKQIHAFIDDKLEKGDEIWSSLVGAIQGSLISLTIFSENYSSSRWCLEELVKIIECRETYGQTVIPVFYHVNPTDVRHQKGSYEKALSEHEKKYNLTTVQNWRHALKKAADLSGIKSFDYKNEPELLGEIINIVNLELMRLDKNPLSLKGLVGIDRSIQYLELMLQHDSSNVRVIGIWGMGGIGKTTIAQEILNKHCSGYDGYCFLVNVKEEIRRHGIITLKEIFFSTLLQEDVKMIPANGLPNYIKRKIGRMKVLIVLDDVNDSDLLEKLFGNHDWFGPGSRIILTTRDKQVLIANKVHVDDIYQVGVLNPSEALELFILHAFNQKLFDM…
HK_NBARC_NBARC.Chr03.32	Chr03	TGFam.AUG	6002401	6004753	ATGTCTGTGTTATCGGAATTTGGGGTGTGGGTGGTATTGGTAACACAAACCATTGCACAGGAAGTGTTTAGCAAATTATATCTGGAATATGAAAGTTGTTGTTTTTTGGCAAATGTAAAGGAAGAAATAAGAAGACTTGGAGTAATTTCTTTAAAAGAAAAACTATTTGCTTCAATATTACAAAAATATGTGAATATTAAAACACAAAAAGGATTGTCCTGTTCTATTAAGAAAATGATTGGCCAAAAGAAGGTGCTTATTGTTCTTGATGATGTGAATGATTCAGAGCAGCTTGAAGAATTATTTGGAACTCCAGACTGGTATGGGTCAGGTAGTAGAATTATTGTAACAACTAGAGATATAAAAGTTCTTATTGCCAACAAAGTTCCTGAAATATAC…	MSVLSEFGVWVVLVTQTIAQEVFSKLYLEYESCCFLANVKEEIRRLGVISLKEKLFASILQKYVNIKTQKGLSCSIKKMIGQKKVLIVLDDVNDSEQLEELFGTPDWYGSGSRIIVTTRDIKVLIANKVPEIYHVGGLSSCEAFQLFKLNAFNQGDLEMEFYELSKRVVDYAKGIPLVLKILAHLLCGKDKEVWKSLLEKLKRIKNNNVHDFVKLSFDDLHHEEQEILLDLSCFCHRENMTENSNMKVDSINILLGDCGSHNAVVVGLERLKDKSLITISEDNVVSMHHTIQEMAWEIVCQESNDLGNRSRLWDPIEIYDVLKNDNGTKAIRSITTPLSTLKNLKLRPDAFVRLSNLQFLDFGNNSPSLPQGLQSLPNELRYLHWMHYPLTCLPEQFSA…
HK_NBARC_NBARC.Chr03.33	Chr03	TGFam.AUG	6018373	6022972	ATGTACTGTAAATGTGGTAGTGTGAAGAATGCATGCCGAGTGTTTGATCAAATGTCGGACAAAAACATTGCTTCATGGCATTTGATGCTTGGTGGGTACACGAGTAATGGTTTAAGGTGTGATGGTTTATTGGCAAGTGGAGGAGGATTGGTTGGTGTCGAAGGGGGAGTGGTGGTGAATGGAACCGCAATCACAGAGGAGGTGGTAGAAGTTATTGATGAGGTGGCAGTGACACGTGTAATCCTACTTAGGCAACGAGTACACATGGCACCTCACATGACATACCTACATGGCCCGTTAATAGTCACGAATGATGTTGAGCTACTTCAAGAAATCATCAATCTTGTGTTGATGACGTTGAGAAAGCATACAGTAGATTCAAAAGGGCTGGTTGGCATT…	MYCKCGSVKNACRVFDQMSDKNIASWHLMLGGYTSNGLRCDGLLASGGGLVGVEGGVVVNGTAITEEVVEVIDEVAVTRVILLRQRVHMAPHMTYLHGPLIVTNDVELLQEIINLVLMTLRKHTVDSKGLVGIDKQVAHLESLLKQESKDVCVIGIWGVGGNGKTTIAQEVFSKLYLEYESCCFLANVKEEIRRLGVISLKEKLFASILQKYVNIKTQKGLSSSIKKMMGQKKVLIVLDDVNDSEQLEELFGTPDWYGSGSRIIITTRDIKVLIANKVPEIYHVGGLSSCEAFQLFKLNAFNQGDLEMEFYELSKRVVDYAKGIPLVLKILAHLLCGKDKEVWKSQLEKLKGIKSNNVHDFVKLSFDDLHHEEQEILLDLACFCRRANMIENFNMKVDS…
HK_NBARC_NBARC.Chr03.34	Chr03	TGFam.PM	6651241	6658855	ATGGATGAACCTAATGGAGAACAACAGACGCTTGTACAATTGAATGAAAGTGAGGCTATCAAAACTATTGTTGAAAACATTACGCGTTTGTTAAACAAGACAGAGTTGTTCGTTGCTGATAATCCAGTCGGCATAGAACCACGAGTCCAGGAAATGATTGAACTATTAGACCAAAAACAATCAAATGATGTTCTAATACTCGGGATGTGGGGGATGGGAGGCATTGGTAAAACGACTATTGCAAAAGCCATTTACAATAAGATTGGCCGCAATTTTGAGGGAAAAAGCTTCCTCGCACATATTAGGGAAGTTTGGGAGCAAGATGCTGGTCAAGTATATCTACAAGAACAACTTCTATTTGATATCAAAAAAGAAACAAACACAAAGATACGTAATGTT…	MDEPNGEQQTLVQLNESEAIKTIVENITRLLNKTELFVADNPVGIEPRVQEMIELLDQKQSNDVLILGMWGMGGIGKTTIAKAIYNKIGRNFEGKSFLAHIREVWEQDAGQVYLQEQLLFDIKKETNTKIRNVESGKVMLKERLRHKRVLLILDDVNKLHQLNVLCGSREWFGSGSRIIITTRDMHILRGRRVDKVFRMKGMDEDESIELFSWHAFKQASPREDFIELSRNLVAYSAGLPLALEVLGSYLFDMEVIEWKNVLEKLKKIPNDEVQEKLKISYDGLTDDTEKGIFLDIACFFIGMDRNDVIHILNGCGLCAENGIRVLVERSLVTVDYKNKLGMHDLLRDMGREIIRSKTPMELEERSRLWFHEDALDVLSKETGTKAIEGLALKLPRNNT…
HK_NBARC_NBARC.Chr03.35	Chr03	TGFam.AUG	6698411	6706097	ATGGATGAACCTAATGGAGAACAGACGAATGAAAGTGAGGCTATCAAAACTATTGTTGAAAATGTTAAGCGTTTGTTAGACCAGACAGAGTTGTTCGTTGCTGATAATCCAGTCGGCGTAGAACCACGAGTCCAGGAAATGATTGAACTATTAGGCCAAAAACAATCAAACGATGTTCTACTACTCGGGATGTGGGGGATGGGAGGCATTGGTAAAACAACTATTGAAAAAGCCATTTACAATAAGATTGGCCGCAATTTTGAGGGAAAAAGCTTCCTCGCACATATTAGGGGAATTTGGGAGCAAGATGCTGGTCAAGTATATCTACAAGAACAACTTCTATTTGATATCGAAAAAGAAACAAACACAAAGATACGTAATGTTGAATCAGGAAAAGTT…	MDEPNGEQTNESEAIKTIVENVKRLLDQTELFVADNPVGVEPRVQEMIELLGQKQSNDVLLLGMWGMGGIGKTTIEKAIYNKIGRNFEGKSFLAHIRGIWEQDAGQVYLQEQLLFDIEKETNTKIRNVESGKVMLKERLRHKKVLLILDDVNKLHQLNVLCGSREWFGSGSRIIITTRDMHILRGRRVDKVFRMKGLDEDESIELFSWHAFKQASPREDFIELSRNLVAYSAGLPLALEVLGSYLFDMEVTEWKNVLEKLKKIPNDEVQEKLKISYDGLTDDTEKGIFLDIACFFIGMDRNDVIHILNGCGLCAENGIRVLVERSLVTVDYKNKLGMHDLLRDMGREIIRSETPMELEERSRLCFHEDALDVLSKETGTKAIEGLALKLPRNNTKCLST…
HK_NBARC_NBARC.Chr03.36	Chr03	TGFam.ISGAP	16533219	16533842	TTGATAATTGCTGAGAAGTTTGATTGTTTGTGTTTTCTTGCAAATGTGAGGGAAAAGTCAAACAAACACGGGTTAGAACACCTCCAAACAATCCTTCTTTCAGAAATACTAGGAGAGATGAACATCAACTTAACAAGTAAGCAACAAGGAATTTCAATCATACAGTCTAGGCTCATGGGAAAGAAGGTTCTCTTGATTCTAGATGATGTTGACATACACAAGCAATTACAAGCAATTGCTGGAAGACCTGATTGGTTTGGTCCGGACAGCAAAATCATCATCACAACTGGGAACAAACAGTTGCTAGCATCTCATGAAGTTAATAAAACATATGAGGTGAAGGAATTGAATGTGAATGATGCTCTTCAGTTGCTTACATGGCAAGCTTTTAAAAAGGAA…	LIIAEKFDCLCFLANVREKSNKHGLEHLQTILLSEILGEMNINLTSKQQGISIIQSRLMGKKVLLILDDVDIHKQLQAIAGRPDWFGPDSKIIITTGNKQLLASHEVNKTYEVKELNVNDALQLLTWQAFKKEKACPTYVKVLKRAVTYASGLPLALEVIGSHLDEKSIQEWESTIKQYKRIPKKEILDILKVLMLWKKKRRIFFLT*
HK_NBARC_NBARC.Chr03.37	Chr03	TGFam.ISGAP	18094346	18098071	ATGGATTTTGATAAATTGGTAGGTAGTGCATCCCTCTATGCATTCCTTCAAATTGTTTTGGACAAGCTAGCTTCAACTGAGGTCGTCAATTTGATCCGTGGAGAGAAGAAGTTGCTTCAAAAGTTGAAGACCACTCTGATAAAGGTCAGTGCTGTGCTTGATGATGCTGAGAAGAAACAGATCACTGATGACAGCAGGGTCAAGGACTGGCTCAATGATCTCAAAGATGCTGTCTATAAAGCCGATGATTTGCTTGATGAACTTTCTACCAAAGCTGTCACTCAAAAGCAGGTAAGCAACTGCTTTTCCCACTTTTTGAATAATAAGAAGATGGCTAGTAAGTTAGAAGACATAGTTGACAGATTAAAGTGTCTTTTAAAACTCAAGGAGAATCTTGGT…	MDFDKLVGSASLYAFLQIVLDKLASTEVVNLIRGEKKLLQKLKTTLIKVSAVLDDAEKKQITDDSRVKDWLNDLKDAVYKADDLLDELSTKAVTQKQVSNCFSHFLNNKKMASKLEDIVDRLKCLLKLKENLGLKEVEMEKNSYWPDEKTIPTTSLEARHIYGRDKDKEAIINLLLEDTSDGKEVAVILIVGVGGVGKTTLAQSVYNDDNLCDWFDFRAWVCVSDKFDIFNITKSVMENVTGKRCEINDLNLLQLGLMEKLAGKRFLIVFDDVWTEDCFSWSLLTYQHGARGSKILVTARNENIATIIDTVKVYRLDQLSNEDCWFVFAEHACLSVESNEDTTALEKIGWEIVKKCNGLPLAAISLGGLLRTKHHVWEWNDVLNNVLWGLSESVFPALE…
HK_NBARC_NBARC.Chr03.38	Chr03	TGFam.ISGAP	18164723	18172388	ATGCCAACAGAGATTGCAATGAACAACAGAAGGTATGAAGTGTTTATGAGCTTCAGAGGAGAAGATACTCGTGCTACTTTCACTTCACATCTCTATGCCGCTCTTCAAAATGCCGGAATCATTGTTTTCAAGGATGACGAGTCACTTCCAAGGGGAGATCAGATCTCAGACTCACTCCTGCTAGCAATCGAACAATCTCAAATTTCTGTTGTTGTTTTCTCAACAAATTACGCAGATTCGCGGTGGTGTCTGCAAGAGTTAGAGAAAATAATGAATTGTAAAAGAACTATAGGGCAGGTGGTTCTGCCAGTGTTCTATGATGTCGATCCCTCTCAAGTACGCTATCAAACTGGCCACTTTGGAGAATCATTTCAAAACCTTTCCAACAGGATTTTAAAA…	MPTEIAMNNRRYEVFMSFRGEDTRATFTSHLYAALQNAGIIVFKDDESLPRGDQISDSLLLAIEQSQISVVVFSTNYADSRWCLQELEKIMNCKRTIGQVVLPVFYDVDPSQVRYQTGHFGESFQNLSNRILKDDDEKAVGEGESDKEYMMSRVLISRWRKVLREAASIAGVVVLNSRNESETIKNIVENVTRLLDKIELPLVDNPVGVESRVQDMIERLDLNHKQSNSNDVLLLGIWGMGGIGKTTIAKAIYNKIGRNFEGRSFLEQIGELWRQDAIRFQEQLLFDIYKTKRKIHNVELGKQALKERLCSKRVFLVLDDVNDVEQLSALCGSREWFGSGSRIIITTRDKHILRGDRVDKMYTMKEMDESESIELFSWHAFKQASPREGFTELSNDVIE…
HK_NBARC_NBARC.Chr03.39	Chr03	TGFam.ISGAP	18675852	18682581	ATGCCTTCCGATCGTGAAATTGATCATTTTGACTTTCTCAGTCAATGGCCCTCCGCCATTCCTGTTCTCAAGAGAATCTATGAAGTGTTTCTGAGTTTCAGAGGGGAAGACACGCGTGCTTCTTTCACTTCACATCTCTATACCGCTCTTCTGAATGCTGGAATCATTGTTTTCAAGGATGACGAGTCACTTCTAAGGGGAGATCAGATTGCACCCTCACTACGGCTAGCAATTGAGCAGTCTCGAATTTCTGTTGTTGTTTTCTCGAGAAATTACGCAGAGTCACGATGGTGTCTCGATGAGTTGGAGAAAATAATGGAGTGCCACAGAACCATAGGGCATGTGGTAGTGCCAGTGTTCTACGATGTTGATCCTTCTGAAGTACGTCATCAAACTGGC…	MPSDREIDHFDFLSQWPSAIPVLKRIYEVFLSFRGEDTRASFTSHLYTALLNAGIIVFKDDESLLRGDQIAPSLRLAIEQSRISVVVFSRNYAESRWCLDELEKIMECHRTIGHVVVPVFYDVDPSEVRHQTGEFGRTFEKLSDRILKEKQEMVPGWQDSKKNMLSRWKELRSTIRSSERWKELLWKTTVQSWREALREAAGISGVVVLNSRNESEAIKSIVENVTHLLDKRELFVADNPVGVEPRVQEMIQLLDLKSSNHVLLLGMWGMGGIGKTTTAKAIYNKIGRNFEGRSFLAHIREVWGQDTGKICLQKQILFDICKQTETIHNVESGKYLLKQRLCHKRVLLVLDDVSELEQLNTLCGSREWFGRGSRIIITSRDKHILRGKGVDKVYIMKGM…
HK_NBARC_NBARC.Chr03.40	Chr03	TGFam.PM	19189831	19199119	ATGGATGTTACAAGCTTAAAAAAAGAGAAATTTGAGATCATATCCTATTCTGCTCCTCCACCAACACTTGGATCCACTTTCTCAAATGTTATTAAAAGCTTCCCAAGTAGAAAATTAATTGTGATAAAGGTCATGGAGAAATTAAAAGATGAAGATTTCAAAAGAGTAAGGATATGTGGGATGGGTGGAGTGGGAAAGACCACATTTGTGAAAGAAATAATAAAAAATTCAGATATAGGCAAGTTTTTTGATGAAGTTGTAATGGCAGTAGTATCCCAAAATCTTGACTATTTGAATATTCAAGGTCAAATTGCTGATGCTTTAGGCTTAAACTTTGATAAGGAAACTATTCAAGGAAGAGCATGCCAACTATATGAAAGAAGGAAAAATATTAATAAT…	MDVTSLKKEKFEIISYSAPPPTLGSTFSNVIKSFPSRKLIVIKVMEKLKDEDFKRVRICGMGGVGKTTFVKEIIKNSDIGKFFDEVVMAVVSQNLDYLNIQGQIADALGLNFDKETIQGRACQLYERRKNINNVLIVLDDVWTYLDFKSIGIPSNEHHKNCRISFTSKLKIYATRWEHHQFFGIFYCSSAKYYNIINIHGVARNVASLRARHQLKLARVHESKDTMTNIEPLLQYRKTKGIEVSLLDSMKARKKIIGFTLTKMESLVDPRMLWIQVTKISENPNLLSTLVGDNKLEEVSQVTIGKGKVKQSSLGRILKKNSRKTKESKKHSNISNSICDGKINICNRNYWLRSSVGELVPLDLEIEATFRRNNAERKRKLLHDRTVASILEEAHFSESS…
HK_NBARC_NBARC.Chr03.41	Chr03	TGFam.PM	24450798	24451412	ATGTTAAAAGTGGCGAAGAGAAGAGTCAAAGGAAAACAGAATGATGTCAATTTTTGGCAAAAGCAAGCTAATAAGATTATTCAAGAGGACACCAAATCAAAAGTGACGTATTTTTTTGGGCGGTGTCCTAATTGCAAATGGCAATATGGTAGGGGGAAGGAACTGACATGCAAGACTAAGGAGATTAAAAGACTCATCATGGAAAGTAACTTTGAAAGTGTTGGAATCCCATGTGATGTTCCAGATGTTGAATATAATTCTTCTCAAAATTTCATTTCTTTTGAAAGTAGAAAATTAAAATATGAAGAAATTTTTAATTCACTATCAGATGACAACAATTATATAACAGGATTGCTAGGGATGGGGAGGACAGGTAAAACAACATTAGTAAAAGAAGTG…	MLKVAKRRVKGKQNDVNFWQKQANKIIQEDTKSKVTYFFGRCPNCKWQYGRGKELTCKTKEIKRLIMESNFESVGIPCDVPDVEYNSSQNFISFESRKLKYEEIFNSLSDDNNYITGLLGMGRTGKTTLVKEVGKELKKSKKFDQVIDTSVSYTPDRKKIQDDIAGPLGLTSLKDCTESERPTRLWRRLTNGEKILIILDDVWC*
HK_NBARC_NBARC.Chr03.42	Chr03	TGFam.PM	25212566	25222654	ATGCCCAATACTGAATTTCCTGTTGGATTAGAATCCCATGTGCAAGAAGTGATTGGATTAATTGAAAAGCAGTCCTCCAAAGTTTGTTTCTTAGGGATATGGGGAATGGGAGGATTGGGTGAACATAAAAAAAACATTGGGATAGGAAGAGCTATGACGGAGAGCAAACTTTTTGGAAGAATGTCACTCATTGTACTTGATGGTGTTAATGAGTTTTGCCAATTAAAAGACCTATGTGGAAATCGTAAATGGTTTGATCAAGAAACTATAATCATTACAACCAGAGATGTACGACTACTTAATAAACGTAAAGTTGATTATGTTTATAAAATGGAGGAAATGGACGAAAATGAATCCCTTGAGCTATTTAGCTGTCATGCTTTTGGAGAAGCAAAACCA…	MPNTEFPVGLESHVQEVIGLIEKQSSKVCFLGIWGMGGLGEHKKNIGIGRAMTESKLFGRMSLIVLDGVNEFCQLKDLCGNRKWFDQETIIITTRDVRLLNKRKVDYVYKMEEMDENESLELFSCHAFGEAKPTEDFDELARNVVAYCGGLPLALEVIGSYLSERTKESALKEEEEPIVDEALVFDDLAHAADLSSARDGVVVDDAEAEVGMKEPMHHDAVAELEDLEGEDRTGEEDQREREESELQCIVGGCFSDDAEHWIKGDLPEELGYLPVLDRIQIDENHIKGSIPLSFANLNSTRHFPGFLDFHTYVREFESFLTNGLTIHTNQLFIEHFGWEEGRLRMNLKVFPEYIGNGSSHMFTTSEVIRIGDLFRQWDIPDNELFVLYELLKLNLCKMM…
HK_NBARC_NBARC.Chr03.43	Chr03	TGFam.ISGAP	25284753	25288214	ATGGAATTAGAGTCTTCTTCATCATCCTTCTCAAAACCGAAATCCCAATGGACATACGATGTGTTCATAAATTTTAGGGGAGAAGACACACGTAGGAGTTTCGTTTGTCATCTCAATTGTGCCCTCTCAAAAGCTGGAGTCAAGACTTTCCTTGATGAGGAGAATCTACACAAGGGAATGAAGCTGGATGAACTAATGACCGCAATAGAAGGGTCTCAGATAGCAATAGTTGTTTTCTCCAAAAGCTATACTGAATCTACTTGGTGTCTTCGTGAGCTTGAAAAAGTCATCGAATGCAACGAAACTTACGGCCAAAGTGTTCTGCCCGTGTTTTACAACATTGACCCATCTGTTGTGCGTCATCGTGATGAGAAACATGATTTTGGCAAAGTTTTGAAA…	MELESSSSSFSKPKSQWTYDVFINFRGEDTRRSFVCHLNCALSKAGVKTFLDEENLHKGMKLDELMTAIEGSQIAIVVFSKSYTESTWCLRELEKVIECNETYGQSVLPVFYNIDPSVVRHRDEKHDFGKVLKSTAEKNYSGEHLENAFVQVEPRTQRSFKILWLGCEQVQYDVLPITKFPVGLKSRVQKVIGFIENQSTRACIIVIWGMGGSGKTTAAKAIYNEINCRFGHKSFIEDIREVCSQTESKGLVSLQEKLLSEILKTNHQIQNVGMGTIMIEKRLSGKRVLIVLDDVNEIGQGTIAIEGLALQLHLSIRDCFKAEAFQEMKRLRLLRLDHVQLTGDYGYLSKQLRWIYWKGFPLNYIPNNFYLEGVIAIDLKHRLPSLEKLILKDCPRLRK…
HK_NBARC_NBARC.Chr03.44	Chr03	TGFam.PM	25296107	25296946	ATGGGAACAACTATGATAGAGAATAGACTTTCAGGAAAAAGGGTGCTCATTGTACTTGATGATGTGAATGAGATTCGCCAATTAGAAGATTTATGTGGAAATTGTGAATGGTTCGGTCAAGGATCTGTAATAATCATTACAACAAGAGATGCAGGTGTACTGAACCTATTTAAAGTTGATTATGTTTATGAAATGGAGGAAATGGACGAAAATGAGTCTCTTGAGCTTTTTTGTTTGCACGCTTTTGGAGAACCAAATCCAAAAGAAGACTTCAATGAACTTGCAAGAAATGTAGTTGCTTATTGTGGAGGACTACTACTAGCTCTTGAAGTTCTTGGATCTTACTTACGTGGTAGGAGGATTGACGAATGGGAAAGTGTATTGTCAAAACTAAAGCAA…	MGTTMIENRLSGKRVLIVLDDVNEIRQLEDLCGNCEWFGQGSVIIITTRDAGVLNLFKVDYVYEMEEMDENESLELFCLHAFGEPNPKEDFNELARNVVAYCGGLLLALEVLGSYLRGRRIDEWESVLSKLKQIPNYQVQEKLRISFDGLRDPMEKDIFLYVCCFFIGKDKAYVTEILNGCGLHADIGIPVLIERSLIKIEKNNKLGMHPLLQQMGREIIRGSSIKEPGKRSRLWFHEDVLDVLIVGFVEEIIKNRGEKRDNIYVEEIELFYSNSNCSQ*
HK_NBARC_NBARC.Chr03.45	Chr03	TGFam.PM	25421500	25428485	ATGGAGTTCGCGTCTTCTTCATCACCCTTCTCAAAATCCAAACCCCAATTCATGTACGATGTGTTCATCAATTTCAGGGGAGAAGACACCCGTAAGAAGTTCGTTTGTCATATCTATAAGGCCCTCTCAAATGCTGGAATCAACACTTTCATTGACGAGGAGAACATACAAAAGGGAATGACGCTGGATGAACTAATGACAGCAATAGAAGGGTCTCAGATAGCAATAGTTGTTTTCTCCAAAACCTATACTGAATCTACCTGGTGTCTTCGTGAGCTTCAAAAAATCATTGAATGCCACGAAAATTATGGGCAAAGAGTCGTGCCCGTATTTTACCATATTGACCCATCCCATATACGTCATCAGGAGGGTGATTTTGGAAGTGCGTTGAATGCAGTT…	MEFASSSSPFSKSKPQFMYDVFINFRGEDTRKKFVCHIYKALSNAGINTFIDEENIQKGMTLDELMTAIEGSQIAIVVFSKTYTESTWCLRELQKIIECHENYGQRVVPVFYHIDPSHIRHQEGDFGSALNAVAERRHSGEDLKSALSNWKRVLKKATDFSGWNERDFRNDAELVKEIVNDVLTKLEYEVLPITRFPVGLESQVQEVIRFIETTTYSCIIGIWGMGGSGKTTTAKAIYNQIHRSFMDKSFIEDIREACKRDRGQIRLQKQLLSDVLKTKVEIHSIGRGTTVIENRLSKKRLLIVLDDVNKSGQLKALCGNLQWIGEGSVIIITTRDKHLFTGLKVDYVHEMKEMHANESLELLSWHAFREAKPKEDFNELARNVVAYCGGLPLALEDLG…
HK_NBARC_NBARC.Chr03.46	Chr03	TGFam.ISGAP	25459739	25463902	ATGGAATTCGCGTCTTCTTCATCACCCTTCTCAAAATCCAAAACCCAATGGATGTACGATGTGTTCATCAATTTTAGGGGAGAAGACATCCGTAAGAATTTCGTTTCTCATCTTCATTCTGCCCTTTTACATGCTGAAGTCAAAACTTTCCTTGACGACGAGAATCTACTGAAGGGAATGAAGTCGGAAGAACTGATCCGAGCAATAGAAGGGTCTCAGATTGCAGTAGTTGTTTTCTCCAAAACCTATACCGAATCTAGTTTGTGTCTTCGTGAGCTTGAAAAAATCATTGAAAGCCACGAAACTCGTGGCCAAAGAGTTTTACCCATATTCTACGAAGTTGATCCTTCCGATGTACGTCAGCAGAAGGGTGATTTTGGAGAAGCCTTGAAAGCAGCT…	MEFASSSSPFSKSKTQWMYDVFINFRGEDIRKNFVSHLHSALLHAEVKTFLDDENLLKGMKSEELIRAIEGSQIAVVVFSKTYTESSLCLRELEKIIESHETRGQRVLPIFYEVDPSDVRQQKGDFGEALKAAAQKGFSGEHLESGLSRWSQAITKAANLPGWDESNHENDAELVEGIINFVLTKLDYGLSITKFPVGLESRVEKVIGFIENQSTKVCKVGIWGMGGLGKTTIAKGIYNRIHRSFIDKSFIEDVREVCETDGRGVTLLQEQLLSDVLKTKVEITSVGKGRTMIKGRLCGKRLLIVLDDVNKFGQLKDLCGNHEWFGQGSVLIITTRDLHLLDLLKVDYVYEIEEMDENESLQLFSWHAFGQPKPREDFNELARDVVAYCGGLPLALEVL…
HK_NBARC_NBARC.Chr03.47	Chr03	TGFam.AUG	34393320	34396153	ATGGCTGAATCATTTGCCATCAATATTGCTAAATCACTGCTGGGGAAACTTGCTTCTTGTGCTTATGAAGAGGCTTCTCGAGCCTATCGTGTGTATGAGAATCTGCAAGGGATTAAAGACACTGTCAATTGTGAAAGGATTGATGTTGACCACAGACTTGTGCAAAGAAGAGAAATGGCTTATTCCCATGTTGATGCTTCAGGATTGATAGGAAGGGACAATGATAGGGAAGAAATTATCAAGCTTTTGATGCAACCTCACTCTCATGGTGACAGTGTTGGAAATAAAAGTATATGTGTTATTCCCATAGTGGGCATTGGAGGCTTGGGGAAGACCACACTTTCAAAGTTGGTGTTCAATGACAAGAGGATGGATGAACTTTTCCAATTGAAGATGTGG…	MAESFAINIAKSLLGKLASCAYEEASRAYRVYENLQGIKDTVNCERIDVDHRLVQRREMAYSHVDASGLIGRDNDREEIIKLLMQPHSHGDSVGNKSICVIPIVGIGGLGKTTLSKLVFNDKRMDELFQLKMWVCISGDFDIWQIIIKIVNYASVPTISLAQHEIINNLDIDQLQSHSDISFLAFQWIIVYLFLSNGHLRKAKKNIQKLENIARQYIDELHSRSFLEDFEDLGHLYYFKVHDLVHDLALYVAKEELLAVNSCTRNIPEQIRHLSVVENHSLSHALFHKSQFSSAKVLYVQSCGNMESLLLHILPKLEVLFVMRCKKLNLLLIYGGQIQRLRMKYFHLEQCPRQDTLPQWIEGIADTLQTLLILNCDNLKMLLECLSVGETRERKLRSQM…
HK_NBARC_NBARC.Chr03.48	Chr03	TGFam.AUG	34504737	34518878	ATGCAGGTTCCTTTTGCACGGTCTTCACTGAATCATGATGATGTATTCATCCTAGACACTCAGAATAAGATTTATCAATTCAATGGTGCAAACTCCAATATCCAGGAAAGAGCCAAGGCTCTGGAAGTTATTCAGTTGTTGAAGGAAAAGTATCATGAGGGAAAATGCGACGTTGCAATTGTTGGTAAGGGCACAAGGCACATGTTTTCCTGTAACTTGATGAAAAGCTTGCCATATGATGGAAAGCTGGATACTGAGTCAGACTCAGGTGAATTTTGGGTTCTCTTTGGTGGTTTTGCTCCCATTGGGAAGAAGATAATTAGTGAGGATGATATTGTTCCAGAGACCATTCCTGCTCAACTCTATAGTATTGCTGATGGTGAGGCCAAGCCTGTGGAA…	MQVPFARSSLNHDDVFILDTQNKIYQFNGANSNIQERAKALEVIQLLKEKYHEGKCDVAIVGKGTRHMFSCNLMKSLPYDGKLDTESDSGEFWVLFGGFAPIGKKIISEDDIVPETIPAQLYSIADGEAKPVEGELSKSLLENYKCYLLDCGAEQQGMGVKGVTKTTSVVEEIPPLLEGGGKMEVWQINGSAKTPLPKEDIGKFYSGDCYIVLYTYHSSERKEDYYLCCWFGKDSTEGRIFDGKEPPQFIALFHPMVVLKVEEVYNFSQDDLLTEDILILDTHAEVFVWIGQCVDPKEKQNAFEIAQEKSNGSSQGGGPRQRAEALAALNNAFNSSPEATSSADKSNGLSRGGPRQRAEALAALNSAFNSSSGTKVYTPRPSGRGQGSQRAAAVAALSS…
HK_NBARC_NBARC.Chr03.49	Chr03	TGFam.ISGAP	34608984	34611572	ATGGCGGAATCATTTCTCTTCAGCATTGCAGAGTCACTCCTTTCAAAGCTTGCTTCGCAGGCTTATGAGGAAGCTTCTCGTGTGCTGGGTTTGTACGACCATCTCAAAAACCTTAAAGACACCCTATCATTAGTCCAGGCTGTCCTGTTGGACGCTGATCAAAAGCAGGAGAAGAACCATGAGCTGCGGGAATGGCTGAGGCAGCTCAAACGTGTCTTCTTTGATGCTGAAGATGTTCTAGATGAATTTGAATGCCAAACACTGCAAAACCAAGTTATCAAAGCTCATGGTACCACCAAAGACAAGGTAAGTCACTTCTTATCAACTTCTAATCCACTTGTTTTTCGTTACAAGATGGCTCAACAAATCAAAGATATCAGCATGAGACTAGACAAGGTT…	MAESFLFSIAESLLSKLASQAYEEASRVLGLYDHLKNLKDTLSLVQAVLLDADQKQEKNHELREWLRQLKRVFFDAEDVLDEFECQTLQNQVIKAHGTTKDKVSHFLSTSNPLVFRYKMAQQIKDISMRLDKVAADRHKFGLQPIDVDTRVVHRREMRETTHSHVNDSDVIGREQDKGEIIELLMQQNPNDDHKSLSVIPIVGMGGLGKTTLAKFVFNDKGINKCFPLKMWVCVSDDFDLKQLIIKIINSADDSVFLADAPDRQKNLNKMDLEQLQNQLRNKLADQKFLLVLDDVWNEDRVKWVGLRNLIHVGAAAGSKILVTTRSHSIASMMGTASSHILQGLSLEDSWSLFVRWAFNEGEEENYPQLINIGREIVKKCRGVPLAVRTLGSLLFSKFE…
HK_NBARC_NBARC.Chr04.1	Chr04	TGFam.ISGAP	11671564	11674623	ATGTACTGTGTATGTACATCTATAGTGAGATCTATCCTAAAGGCCACTACCACTGCACTTGTTAGCCATCTCTGGGAAGAGTTCTTATTCATGGACAGTGAAAGAGCGGACAACAACCAAGGCACGAATGCAACACACACTGCAATCTCTAGTACACTTAAAATTAAGATTGCTAGCAGCAGCAAACAAGGTGAGGAGAGTTTAGACTGCTCAAACTTACCTTCACCAAACATAAACAATGCCATAGAATCATCACCTTATGGTTCTCCTCTTGTGTCCCCACCTTCATCAGCCTTTGTTTCAGCATTGCAGTCTCCATATATATCTCCAAGGGCCATAATCCCAGACCCCCCTAATGGTTCTTCTCCTTTGGAAAACCAACCATCGCTACCAATTACT…	MYCVCTSIVRSILKATTTALVSHLWEEFLFMDSERADNNQGTNATHTAISSTLKIKIASSSKQGEESLDCSNLPSPNINNAIESSPYGSPLVSPPSSAFVSALQSPYISPRAIIPDPPNGSSPLENQPSLPITTTTATTSTPEDVPSSSYTPPSDQYEFSDDTADTRLKYVTCFPEAAPERISFSFQVPRISFTKGPVSPATNAKLRSCDVYIGFHGQNPNLVRFCKWLKSELELQGIDCMLADRAKYSDSQSHEIADRVICSVAFGVVVVTSSSFLNHYSTEEVRFFAQKKNLIPLLFDTGPSEIMSLLNCNSVDKECKETIDGLMKCNELNLEATDGNWRSCIVKAASILRARLGRKNAEQKDNMQGYESLPFPRNTYFVGREKEIMEIEGLFFGRG…
HK_NBARC_NBARC.Chr04.2	Chr04	TGFam.PM	15736382	15736951	ATGATAATCATAACAACAAGAGATACACATTTGCTAGATCTTGTTGGGGTCGAAAAGAGATATGAAGTGAAAGTGCTAAACGACCAAGAATCTCTGGAGTTCTTTTGTAAGAGTGCCTTTAGAAAGAGTTGTCCTGAAACAAACTACAAAGATCTGTCCAATCGTCCAATGAGTTGTTGCAAAGGCCTTCCATTGGCCTTAAAAGTACTAGGTTCTCATTTGGTTGGCAAAAATTTGGGTGAATGGAAAGAGTCCACTTCCAGGTGGATTGACATATGTAAAAAGAGAACAGATGCGTGTGACTTCAGCATAAGAGATGGTATTACAACATTAGTTAATAAATCCCTTTTAACTGTTGAGATGGATTGCTTGGGGATGCACGATCTTATACAGAACATG…	MIIITTRDTHLLDLVGVEKRYEVKVLNDQESLEFFCKSAFRKSCPETNYKDLSNRPMSCCKGLPLALKVLGSHLVGKNLGEWKESTSRWIDICKKRTDACDFSIRDGITTLVNKSLLTVEMDCLGMHDLIQNMGRVIIKEEAWNEVGERSRLWHHEDVL*
HK_NBARC_NBARC.Chr04.3	Chr04	TGFam.PM	17987660	17987938	ATGCAAACCTTTCGTCCTATCCACTATCTAAGATCTTTTCCCACTGAAGATTGCCGGTCCTTACTTTCTCATCATGCATTTGGAGCAAGCAACAACAGGAAACAATCCAAACTAGAAGTAATTGGCAAAGAAATTGCAAAAAGATGTGGTGGCTTACCATTAGCCGCAGAAGCTCTTGGGGGTCTTCTTCGGACCAAATTACTAGAAAAGGAATGGAATAATGTCCTAAAAAGTAACATCTGGGATTTGCCAAATGTTAAAGTGCTACTAGCTTTGTAA	MQTFRPIHYLRSFPTEDCRSLLSHHAFGASNNRKQSKLEVIGKEIAKRCGGLPLAAEALGGLLRTKLLEKEWNNVLKSNIWDLPNVKVLLAL*
HK_NBARC_NBARC.Chr04.4	Chr04	TGFam.ISGAP	19802762	19805329	ATGGAAGCCATTGTTCGGATAGTCTTACAAAACTTAAACTCTTTTTCCCAAGAGGAGTTTGGAATCATTTGGAATCTCAAAGATGATATACAACGGATGAAGAGGACAGTGTCTGCAATAAAAGCTGTATGCCAGGATGCAGGGGCAAAGGCTAACAACCTTCAAGTTAGTAATTGGTTGGAGGAGCTGAAAGATGTACTCTATGATGCAGATGACTTGCTAGAGGATATCTCTATTAAAGTTTTGGAAAGAAAAGCGATGGGTGGTAACAGCCTCTTAAGAGAGGTTAAGATTTTCTTCTCCCACTCAAATAAAATTGTCTATGGTTTTAAATTGGGACATGAAATGAAAGAAATCCGGAAGAGGCTAGAGGATATTGCTAAAAACAAGACTACATTG…	MEAIVRIVLQNLNSFSQEEFGIIWNLKDDIQRMKRTVSAIKAVCQDAGAKANNLQVSNWLEELKDVLYDADDLLEDISIKVLERKAMGGNSLLREVKIFFSHSNKIVYGFKLGHEMKEIRKRLEDIAKNKTTLQLTDCPRETPIGCTEQRQTYSFVRKDEVIGREEEKKLLTSYLLHPDASVADNVCVVPIVGIGGLGKTTLAQLVYNDNAVQRYFEEKLWVCVSDEFDIKKIAQKMIGDDKNSEIEQVQQDLRNKIQGRKYLLVLDDVWNEDRELWLKLKSLVMEGGKGSIIIVTTRSRTVAKIMATHPPIFLKGLDLERSLKLFSHVAFDGGKEPNDRELLAIGRDIVKKCAGVPLAIRTIGSLLYSRNLGRSDWLYFKEVEFSQIDLQKDKIFAIL…
HK_NBARC_NBARC.Chr05.1	Chr05	TGFam.ISGAP	639113	639847	ATGGGTGGATTGGGTAAGACCACCCTCGCCCAACATATATACAATGACCCAAGGATGGAGGAGGCTGATTTTCATATCAAAGCTTGGGTCTGTGTTTCGGATGATTTTAATGTTTTCAGGTTGACAAAAATAATTCTTGAGGCAATCACTAAATCAAAAGATAATAGCAGAGAGCTAGAAATGATTCATGGGAGATTGAAAGAAAAATTAACAGGGAAGAGATTTCTTCTCGTTTTGGATGATGTTTGGAATGAAAGACGAGAAGAATGGGAGTCTGTGCAAACTCCTCTTAATCATGGTGCTCCGGGAAGTAGAATTCTTGTCACCACACGCTGTGAAGAAGTTGTTTGTATCATGCGGTCTAATAAAGTGTATCACCTAAAGCAATTACAAGAAGAT…	MGGLGKTTLAQHIYNDPRMEEADFHIKAWVCVSDDFNVFRLTKIILEAITKSKDNSRELEMIHGRLKEKLTGKRFLLVLDDVWNERREEWESVQTPLNHGAPGSRILVTTRCEEVVCIMRSNKVYHLKQLQEDHCWQVFVKHAFQDDHSILNAELKEIGTKIVQKCKGLPLALKSIGSLLHTAKSSISEWESVLLSNIWDILKGESEIIPALLLSYHHLPSHLKMCLACCALFPKDYEFVKEHL*
HK_NBARC_NBARC.Chr05.2	Chr05	TGFam.AUG	4242428	4244613	ATGTTCTGGATTGCAGCCACGATATCTGCAATTGGAACGATCGTTGCGGTTGACAGGCTTGCTTCTCGTCAAGTTCTTGACTTCTTTTGTGCAAGAAAACTCGATGAGATGCTGCTCGGCAAGTTGAACATGAAGCTGCTGTCCATTGATGCTCTGGCTGATGATGCAGATCAAAAGCAGTTCAGAGATCCACGTGTGAAAGCATGGCTTTTTAAGGTCAAAGATGCTGTGTTTGATGCAGAGGATCTCTTGGATGAAATAGACTATGAACTCGCCAAATGTTTGAAAGAGGCTACTTATTCTGGTGTTGGATCAGGTAATAAAGTGTCACAGAAATTGCCATCAACATCTTTGGTGGTTGAAAATGTTATTCATGGCAGAGATGATGACAAAGAAACA…	MFWIAATISAIGTIVAVDRLASRQVLDFFCARKLDEMLLGKLNMKLLSIDALADDADQKQFRDPRVKAWLFKVKDAVFDAEDLLDEIDYELAKCLKEATYSGVGSGNKVSQKLPSTSLVVENVIHGRDDDKETIFKWLTSEIDSHNQLSIFSIVGMGGVGKTTLAEHVYNDSRMEEANFDIKAWNERREEWEAVQTPLNYGAPGSRILVTTRSEKVASTVRSCKVHRLKQLQENRCWQIFAKIITPVEC*
HK_NBARC_NBARC.Chr05.3	Chr05	TGFam.ISGAP	12628850	12632871	ATGAGCGATTATCTCAAAGAGAAAGGAGGTCCCAGGTTGGTTATCATGGGAGAGACCAAACAACTTGTTACCCTTTTGACACGATTTCAAGCGGCAATGAAAATGATCAAGGACATAGTGGAAAAAAGTAGATCGAGTAAAAAGAGCAAACGATTACTGAGGAAAACCCTCAAGAATATGACTCCTCTGCTGCAGGAAATCAATCAATACAATGAACACTTGGAACCACCCCGAGAAGAAATCAACACTCTTATGAAAGAAAAAGATGCAGTGGAAGAGCTTGTGTGCTATTCCTGCTCCAGGAGTATTTGGTGGACCAAATTTCTCTCTTGGCTTCCGCTCTACGGGGACGGACTTTGGCATAACAAGAATAATCCCCTTGCTGCAGATGACAACCAA…	MSDYLKEKGGPRLVIMGETKQLVTLLTRFQAAMKMIKDIVEKSRSSKKSKRLLRKTLKNMTPLLQEINQYNEHLEPPREEINTLMKEKDAVEELVCYSCSRSIWWTKFLSWLPLYGDGLWHNKNNPLAADDNQVKYIKNTLYEVKEVLELLDIENFQQKLKGVGSPIKCPFGVPENPGFTVGLNPLLSKLKMEVLRDGMSTHLLTGLGGSGKTTLATKLCRDEEVKGKFKENILFFTFSQTPKLKNIIERLFEHCGYHVPEFISDEDAIKRLEILLRKIEGSPLLLVLDDVWPGSEALIEKFQFQMSDYKIVVTSRVAFPKYGTPYVLKPLAHEDAMTLFRHHALLEKSSSHIPDKEIVQKVVRYCKGLPLAVKVIGRSLSHRPIEMWQKMVEELSQGH…
HK_NBARC_NBARC.Chr05.4	Chr05	TGFam.PM	12676960	12682150	ATGGGTTCGATTTTCACTATCGATGGGGGATCTTGTTGGCAGGAAATCTATAAGTACTTCTATAACCGATCTTTGAGCCTTGAGACCCATCCTGACCTTGGTAAATTCAGGGAAAATATTTATTTTGTAACCTTTTCAAAAACGCCCAAGTTGAAGATTTTTGTAGAAAGACTATTTGAACACTTTGGATATCAAGTGCCTAAGTTTCAAACTGATGAAGATTCAATTAATCAATTGGGACTTTTGGTAAGGAAATTCGAGGGAAGCCCAATGCTACTGGTTTTGGATGATGTATGGCCGGGCTCAGAAGCCCTCGTGGAAAAATTTAAATTTTATTTATCAGATTACAAAATTTTGGTGACTTCAAGGGTTGCATTTCCTGGATTTGGCACCCAATGT…	MGSIFTIDGGSCWQEIYKYFYNRSLSLETHPDLGKFRENIYFVTFSKTPKLKIFVERLFEHFGYQVPKFQTDEDSINQLGLLVRKFEGSPMLLVLDDVWPGSEALVEKFKFYLSDYKILVTSRVAFPGFGTQCVLKPLVYEDAMTLFHHYALLDSNSLNTPDEDIVEQVVKSCKGLPLAIKVIGRSLSHRPYELWQRMVEELSHGHSILDSNIELLTYLQKILDVLEDNTVIKECFMDLGLFPEDQRIPVTVLIDIFAESYGLDDDGIEAMTIINKLESMNLVNVLIARKNTSDTDSYYYNNHFIVVHDLLRELAIYQSAQEQLEGSKRLIIDTKENKNEWGLGEKQQGMISRILSNCFRYCSKQKPPQIHARTLSISIDETCNSHWSHMQPAKVKYSF…
HK_NBARC_NBARC.Chr05.5	Chr05	TGFam.ISGAP	18623904	18626992	ATGGAAGACACCGCACAACAAATCAAGCGTCCTTTTGGTGTTCCTGAAGGACCAGAATTCACTGTTGGGTTGGATGTACCTTTGAGCGAGTTGAAGGTGGAGCTTCTTAAAGAAGGTGTGTCCATCATTATGCTGACTGGTTTAGGTGGATCAGGAAAAACCACTTTGGCTACAAAGCTTTGTTGGGATGAACAAGTCATAGGTAAATTCAAGGAAAATATTTTATTTGTCACCTTCTCAAAAAAGCCTAAGTTGAAGATTATTGTAGAAAGACTATTTGAACATTGTGGATATCAAGTGCCTGAGTTTCAAAGCGATGAAGATGCAGTCAATCAATTGGGACTTTTGCTGAGGAAAATTGATGCAAGTCCTATGTTGCTGGTCCTGGATGATGTCTGG…	MEDTAQQIKRPFGVPEGPEFTVGLDVPLSELKVELLKEGVSIIMLTGLGGSGKTTLATKLCWDEQVIGKFKENILFVTFSKKPKLKIIVERLFEHCGYQVPEFQSDEDAVNQLGLLLRKIDASPMLLVLDDVWPGSEALVEKFKVQISDYKILVTSRIAFHRFGTPFILKPLVHNDAITLFRHHALLEKNSSNIPDEDLVQKVVRHCKGLPLAIKVIGRSLSNRSYEMWQKMVEEFSHGHTILDSNIELITSLQKILDVLEDNHIIKECFMDLALFPEGQRIPVAALVDMWVELYGLDNDGIATAIVKKLASMNLANVLVTRKNTSDTDSYYYNNHFIILHDILRDFAIYQSNQEQVEQRKRLMIDITENKPKWWPREKQQGLMIRVLSNIFGWRVEQK…
HK_NBARC_NBARC.Chr05.6	Chr05	TGFam.ISGAP	18636606	18640941	ATGGAAGAGACTACAGAGCGTGTTGCTCTTCAAGAGAGATTGAGGATGATGTCTTCGGAAATTGTGGAAAAGGGTCAAAGCAGTGAAAGCAACAAGCAAATACTGAGGTCAACACTTAAGGATAACGCTCCCGTGGTGCTAGAGATCAAGCAATACAACGAACACTTGAATCCACCCAGAGAAGAAATCAACACCCTTATAGGAGAAAAAGATGCAAAAGAAAAATTTGTTTGTAAATGCTTCTCCAAGTGTCTATCTTTGTTTCTCTGCAGATTTGGGCAGAAGAGGGGTCATTCATTTGCTGGTGGTGAGAAGCAAGCTCTTGTGGCAAAAGATATTGAAGAGAACCTTTACAAAATGAGAGAAATTCTTGAGCTTCTTAGCAAAGGGAGTTTTGAG…	MEETTERVALQERLRMMSSEIVEKGQSSESNKQILRSTLKDNAPVVLEIKQYNEHLNPPREEINTLIGEKDAKEKFVCKCFSKCLSLFLCRFGQKRGHSFAGGEKQALVAKDIEENLYKMREILELLSKGSFEKNLGGVGGPMKCPFGVPQKPEFTVGLDEPLSKLKVEVLRDGVSVVLLTGLGGTGKTTLATKLCWDEQVKGKFSENIIFVTFSKTPQLKIIVERLFEHCGCQVPDFQSDEDAVNQLGLLLRQIGRSSVLLVLDDVWPGSEALVEKFKVQIPEYKILVTSRVAFSSFGTQCILKPLVHEDAVTLFRHYALLEEHGSSIPDEELVQKVVRICKGLPLAVKVIGRSLSHQPSELWLKMVEELSQHSILDSNTELLTCLQKILNVLEDDPV…
HK_NBARC_NBARC.Chr05.7	Chr05	TGFam.ISGAP	33929389	33932358	ATGTCTGGGCTTGAGGTTGTAGCCCCTCTTGTTGGAGAGGTAGGAGCGCATGGCATTGGAGAATTACATTCTACAATTGCATCTAAAATTGCGTCTTCCAGAAACCTTGATGACAACTACAACATTTTGCTCAAAGACATGGAGATGCTACTTGCAATAAAGAAGGATAAAGAGAGGGAGGTTCAAAGAAACAACCACAAAGATACCACTAATGCTTACAAACTGTGGACAAACAGGGTATCAGATGCTGCAGAAGAAGTGCAGAAGCTGAAAGTTAAATACGAAGAGAAAATGCTACCCTGGTGGCGTATTCAACGGCGTTCACATCTGAGTGAAGAGATGGAGAAGAAGTGCAACTATGTTCGTGAACTTAAGAAGGATGAATGTTTAAGAGATTTT…	MSGLEVVAPLVGEVGAHGIGELHSTIASKIASSRNLDDNYNILLKDMEMLLAIKKDKEREVQRNNHKDTTNAYKLWTNRVSDAAEEVQKLKVKYEEKMLPWWRIQRRSHLSEEMEKKCNYVRELKKDECLRDFLVDKPPEPVLKELNVPQISGYPTLQGALKNMLGLLKNNKIKVIGVCGTKGVGKTTIMQNLNNNEEVAKLFEIVIFVKATADDHKLQEKIANRLMLDIETNKKHSGDVARRIHKELEKKKYLLILDEVEDAINLEQLGIPSHVNNGGKVVIATRLPRVYKLNKVQRVIKVMELSPEEAWKMFRDTVHAFNPKIDSLEIQPIAKLVCKRCSRLPLLIYNIANSFKLKESASSWSAGLEDLKPWPELQNQGLEELYSCLKFCYDELKDK…
HK_NBARC_NBARC.Chr05.8	Chr05	TGFam.ISGAP	37387752	37390739	ATGGATATTCAAGAAGAGAGCTCCACCACACTTGGACCCTTGACAGCAATGAGTTCAAGGAACATGTCATCCTCATCTTCAGCTTTTTTTTCAGCTAATCAATCACCCTTCTTCTCTCCAAGATCATCATCATGTCAGTTATCAGAGTCTTTGCGACCTGATGCTCCCAGTGACAGAATTCATTCAGATGCTACTGCCCCCAGCACCAGTTCAGGGATTCCAGAACCAAAGTCTCTAGTGAATGTTGGATGCACCTTCTCTGAGGTGGTTGCATCTCCAGCTGGCTGTAATGCAGGTGATTTGCAGAACCTTGATCGCATATCTTCCTCAGTCGGCATCTCTAGTAGCACTGTATCTGGTTACTGCCATCCTTATGATGATGGTTATTCTGGACAGAAA…	MDIQEESSTTLGPLTAMSSRNMSSSSSAFFSANQSPFFSPRSSSCQLSESLRPDAPSDRIHSDATAPSTSSGIPEPKSLVNVGCTFSEVVASPAGCNAGDLQNLDRISSSVGISSSTVSGYCHPYDDGYSGQKEKRSKKGRNKRTSSTPGSTSLSSYRLKSCDVFIGLHGRKPPLIRFANWLRVELEIQGISCFISDRAGCRNSCKLGIAEKAMDVASFGIVIITRKSFKNPYTIEELQFFSGKKNLVPIYFDLSPADCLVRDIIEKRGEMWEKHGGELWILYGGLEQEWKDAVHGLSRVEEWKLEAHDGNWRDCILRAVTLLAMKLGRRSVAEHLTKWMEKVKEELPFTRNENFIGRKKELSQLEFMLFGDVTGDSRQDYIDIKARPKRRHLTIGRGK…
HK_NBARC_NBARC.Chr06.1	Chr06	TGFam.PM	5583561	5583980	ATGGCTCTGAGTCAACCAAATATTATCATACTTTGGATGCATGGATCAAGTAATGCGAGAAAGGGCAACGTGGTGGAGAAAATCACGAGGAGAGTTCAGAGGGACCAGCTGTTTGATTTGGTTGTGATGTCAAGTGTGAGGAAAAAGCCCGACTTAAGAAGAATTCAAGAGAAAACTCTGGAGGGAAGAGCTACCTGTTTGTGCAATAGGATAAAGATGGAAGAGAAGATCCTTATCATCCTAAATGATCTTTGGGGTGCAATCAACTTGGGTAAGATAGGAATTCCATTTGGAAACGATCAGAAGGGGTGTAAAATTTTGCTAGTATCTTCTCATAATCAAGGTGTTGTTGTCCAACCAAATGAAAACCCAAATAGAAGTTTGTGTGAGTCTTCAGAT…	MALSQPNIIILWMHGSSNARKGNVVEKITRRVQRDQLFDLVVMSSVRKKPDLRRIQEKTLEGRATCLCNRIKMEEKILIILNDLWGAINLGKIGIPFGNDQKGCKILLVSSHNQGVVVQPNENPNRSLCESSDGRRLKN*
HK_NBARC_NBARC.Chr06.2	Chr06	TGFam.ISGAP	13996948	13999576	ATGGCCGAAATTTATGTCTCCAATATTTCTGCATCACTGTTAGGGAAGCTTGCTTCTCACGTTTATGAAGAAGCTTCTCGGGCCTATGTTGTGTATGAGGATCTGCAAGGGATCAAAGACCCTTTGTCAATTGTCAATGGTGTACTATTGGGTGCTGAGGAGAAGAAGGAGCAAAGGCAAGGGCTTCGGGAATGGCTGAGGCAGATTCAAAGCGTCTGCTACGATGCTGAAGATGTGTTGGATGAATTTGAGTGCCAAAAATTGCGAAAGCAAGTTGTCAAAGCTTCAGGCAGCACCAGCATGAAGGTAGGACACTTCTTTTCTTCGTTAAATCCTCTTGTTTTCCGTCTTAGGGTGACTCGTCGAATCAAAGATGTTAGGGAGAGATTGGATAAGATA…	MAEIYVSNISASLLGKLASHVYEEASRAYVVYEDLQGIKDPLSIVNGVLLGAEEKKEQRQGLREWLRQIQSVCYDAEDVLDEFECQKLRKQVVKASGSTSMKVGHFFSSLNPLVFRLRVTRRIKDVRERLDKIAADGNKFGLERIGGDHRLVPRREMTHSHVDASGVIGRGNDREEIIKLLMQSHPHGDGDGDKSLCVIPIMIIKIINSAAYASAPAIATQENISSLDIEQLQSRLRYKLSGQKFLLVLDDTWNDDRAKWTELKDLIKVGAAGSKIIVTTRSNSIASMIGTVPSYILEGLSIENCLSLFVKWAFKEGEEKKYPNLVEIGKEIVKKCQGVPLAVRTLGSSLFLNFDLERWEFVRDNEIWNLQQKKNDILPALKLSYDQMPSYLRHCFAFF…
HK_NBARC_NBARC.Chr06.3	Chr06	TGFam.ISGAP	41056177	41059886	ATGGCTGCAGAATTGGTTGGTGGTGCTCTTCTTTCGGCTTTCCTTCAGGTTGCGTTTGAGAAGCTTACTTCTCCTCAAGTTCTGGACTTCTTTCATGGAAGAAAACTCGATGAGAAGCTGCTGAGCAAGATGGAAATCAAGCTGCACTCCATCCAGGCTCTGGCTGATGATGCAGAACAAAAGCAGTTCAGAGATCCACATGTCAGAAACTGGCTTCTTAAGGTAAAAAATGTTGTGCTTGATGCCGAGGATGTCTTGGATGAGATACAATATGAAATCTCCAAATGCCAAGTGGAAGCTGAATCTGAATCTCAAACCTCTACAGGCTGTTCTTGCAAGGTACCAAATTTCTTCAAAACTTCTCATGCCAGTTCCTTTAACAAGGAAATTAAATCACGG…	MAAELVGGALLSAFLQVAFEKLTSPQVLDFFHGRKLDEKLLSKMEIKLHSIQALADDAEQKQFRDPHVRNWLLKVKNVVLDAEDVLDEIQYEISKCQVEAESESQTSTGCSCKVPNFFKTSHASSFNKEIKSRIEQVLDSLEFLSSQKGDLGLKNASGVDYGSGSGSEVSQKLPSTSLLSESVIYGRDDDKEMILNWLRSDTEDCNQLSVLSIVGMGGVGKTTLAQHVYNDPRIEGKFDIKAWVCVSNEFDVFKVTRTILDTITKSVDDSRELEMVHGRLKEKLTGNKFLLVLDDVWNENRHKWETVQRPLDCGAQGSRILVTTRSKKVASTMQSKEHHLEQLEKDHCWRLFNKHAFQDDNAQSNPDFKEIGMKIVEKCKGLPLALKTIGSLLHRKTSI…
HK_NBARC_NBARC.Chr06.4	Chr06	TGFam.ISGAP	41523763	41528221	ATGGCTTTTACTTCTAATGACGTCATCCAATGCACCTCTTCTTCTTCGTTTGAGTATGACGTGTTTGTGAGCTTCCGCGGTGAAGACACACGCAACAGCTTCACCGGTTTTCTTCTTCAAGCTCTGAAAAAAGAAGGCATCGAGGCCTTCAAAGATGATAAAGATATCAGGAAAGGCGAATCCATAGCACCAGAGCTAATACGAGCCATTGAAGGGTCTCATGTTTTCCTTGTTGTCTTTTCCAAGGACTATGCTTCCTCAACTTGGTGCCTGCGTGAACTAGCACATATCAGGAATTGCATTCAAACATCACCCAGACATCTTCTGCCTATTTTTTATGATGTTGATCCATCACAAGTGCGAAAACAGAGTGGAGACTATCAGAAAGCCTTTGCCCAA…	MAFTSNDVIQCTSSSSFEYDVFVSFRGEDTRNSFTGFLLQALKKEGIEAFKDDKDIRKGESIAPELIRAIEGSHVFLVVFSKDYASSTWCLRELAHIRNCIQTSPRHLLPIFYDVDPSQVRKQSGDYQKAFAQHQQSFRFQEKEINIWREVLELVANLSGWDIRYKQQHAVIEEIVQQIKNILGSKFSTLPYDNLVGMESHFAKLSKLICLGPANDVRVVGITGMGGIGKSTLGVQKQLLSQSLNERNLEICNVSDGTLLAWKRLSNAKALIVLDNVDQDKQLDMFTGGRVDLLRKCLGRGSIVIIISRDKQILKAHGVDVIYQVKPLNDEDAARLFCRKAFKSNYIVSDFEKMTGDALLHCQGHPLAIEVLGSSLFDKDVSHWRSALASLRVNKSKNI…
HK_NBARC_NBARC.Chr06.5	Chr06	TGFam.ISGAP	41554473	41559305	ATGGATGCTATTGCAAGCGTGGCATCAAACGTGGCTGCACCTTTGCTGAAGCATCTCACTTATGTGTTGATGTACAGTACTTACCTGAATCAGCTAGAAACCGAGATTCAGAGGCTGCAGCATGAGGAGAAAGAAGTGAGGCACACTGTTGAGGCTGCAAAGAGGAGTGGTGAGGAGATTGAGGACACTGTGCTTGACTGGTTTGGGAGAGTGCGTGCAACAGTTGAGGAGGGGCAATCATTTCTTAGCGGCGAGGATCGTGAAAGAATTGGATGCTTGGACGTGTACTCGAGGTACACGAAGAGCCAGAGGGCAAAAGACTTGGTGGATCTTGTGAGGGAGATGAGAAAGGAGACTTTCGACCGGGTTTCGTACCGATGTGCCTTGAGATGCAACGTT…	MDAIASVASNVAAPLLKHLTYVLMYSTYLNQLETEIQRLQHEEKEVRHTVEAAKRSGEEIEDTVLDWFGRVRATVEEGQSFLSGEDRERIGCLDVYSRYTKSQRAKDLVDLVREMRKETFDRVSYRCALRCNVSPSAREYVELESRKMMLNEIMKVLKDGDVDIVGLYGMAGVGKTALVKELAWQAEMDGLFDAVVMATVTNSPDVGMIRAEIADGLGLKFDELTELGRASRLRQRIRQEQRILVILDDVWGKLELTQVGVPFGENKRGCKCQLLVTSRDLNVLNTNFEVDKVYRLEVLSEDESWELFEKRGGDSVKETSVQPMAEKVAKSCDGLPLLIVTVVEAMKNQDLYAWKDALEQVTSFELEGYFYSSVRYAIELSYDHLENHELKISSSFWDP…
HK_NBARC_NBARC.Chr06.6	Chr06	TGFam.ISGAP	42346393	42350014	ATGGCTTCTACTTCTAATGCCATCATCCAATGCACCTCTTCTTCTTCGTTTGAGTATGACGTGTTTGTGAGCTTCCGCGGTGAAGACACACGCAACAGCTTCACCGGTTTTCTTTTTCAAGCTCTGAAAAAACAAGGCATCGAGGCCTTCAAAGATGATAAAGATATCAGGAAAGGAGAATCCATAGCACCAGAGCTAATACGAGCCATTGAAGGGTCTCATGTTTTCCTTGTTGTCTTTTCCAAGGACTATGCTTCCTCAACTTGGTGCCTGCGTGAACTAGCACATATCTGGAATTGCATTCAAACATCTCCCAGACTTCTTCTGCCTATTTTCTATGATGTTGATCCATCACAAGTGCGAAAACAGAGTGGAGACTATCAGAAAGCCTTTGCCCAA…	MASTSNAIIQCTSSSSFEYDVFVSFRGEDTRNSFTGFLFQALKKQGIEAFKDDKDIRKGESIAPELIRAIEGSHVFLVVFSKDYASSTWCLRELAHIWNCIQTSPRLLLPIFYDVDPSQVRKQSGDYQKAFAQHQQSSRFQEKEIKTWREVLNHVGNLSGWDIENKQQHAVIEEIVQQIKNILGCKFSTLPYDNLVGMESHFATLSKLICLGPVNDDVRVVGITGMGGIGKSTLGQALYERISHQFNSCCYIDDVSKLYKREGRLGVQKELLSQFLNERNLEICNVSDGTLLAWKRLHNAEALIVLDNVDQDKQLDMFTGGRNDLLRKCLGKGSIIIIISRDQQILKAHGVDVIYQVEPLNKNDAVRLFCKKAFNNNYIMSGFKKLTSDVLSHCQGLPL…
HK_NBARC_NBARC.Chr06.7	Chr06	TGFam.AUG	42357637	42364044	ATGGTGAGAGGCTTGCCTAGCATTAACCACCCAGACCAACTTTGCGAAGGATGTCTAATTGGGAAGCAATTTCATAAAAGTTTTCCAAAGGAATCAACAACAAGAGCAACAAAGCCGCTAGAGCTTATACACACCGATGTCTATGGACCAATCAAACCCAATTCATTTGATAAGAATAAGTACTTTCTCCTCTTTATTGATGATTATTCCAGAAAAACCTGGGTTTATTTCTTGAAGGAGAAATTAGAAGTGTTTGAAAACTTTAAGAAGTTCAAAGCCCTCGTGGAGAAAGAAAGTGGTCTTTCCATCAAGGCCATGAGATCTGATCGAGGAGGAGAGTTCACTTCAAATAAGTTCAACAAATATTGTGAAGACCATGGAATCCGTCGCCCACTGACA…	MVRGLPSINHPDQLCEGCLIGKQFHKSFPKESTTRATKPLELIHTDVYGPIKPNSFDKNKYFLLFIDDYSRKTWVYFLKEKLEVFENFKKFKALVEKESGLSIKAMRSDRGGEFTSNKFNKYCEDHGIRRPLTMPRSPQQNGVAERKNRTILNMVRSMLKSKKMPKEKPGISHLKVFGSIAYTHVPDKKRTKLDDKSEKYVFVGYDSRSKGYKLYNPNSRKIVISRDVEFDEEDCWDWSVQEDKYDFLPYFEEDDEIEQPIIEEHITPPASPTPRLDETSSSERTPRLRSIEEIYEVTKNLNDINLFCLFGDCEPLSYQEAAENIKGKDAMDEEIKSITKNDTLELTTLPRGHKAIGVRWVYKANKNAKGDVERYKARLVAKGYSQRQGIDYDEVFAPV…
HK_NBARC_NBARC.Chr06.8	Chr06	TGFam.AUG	42404637	42409217	ATGTTAGCTGGAAATACCTATGAAGCTTCCGCGGTGAAGACACACGCAACAGCTTCACCGGGTTTTCTTTTTGAAGCTCTGAAAAAACAAGGCATCGAGGCCTTCAAAGATGATAAAGATATCAGGAAAGGCGAATCCATAGCACCAGAGCTAATACGAGCCATTGAAGGGTCTCATGTTTTCGTTGTTGTCTTTTCCAAGGACTATGCTTCCTCAACTTGGTGCCTGCGTGAACTAGCACATATCTGGAATTGCATTCAAACATCACCCAGACATCTTCTGCCTATTTTTTATGATGTTGATCCATCACAAGTCCGAAAACAGAGTGGAGACTATCAGAAAGCCTTTGCCCAGCACCAACAAAGTTCCAGGTTCCAAAAGAAGGAAATTAAAACATGG…	MLAGNTYEASAVKTHATASPGFLFEALKKQGIEAFKDDKDIRKGESIAPELIRAIEGSHVFVVVFSKDYASSTWCLRELAHIWNCIQTSPRHLLPIFYDVDPSQVRKQSGDYQKAFAQHQQSSRFQKKEIKTWREVFEQVASLSGWDIRNKQQHAEIEEIVQQIKNILAMSRPVNDVRVVGITGMGGIGKSTLGRALYERISHQFYSLCYIDDVSKLYQDYGTLGVQKQLLSQSLNERNLEISNVSDGTLLAWKRLFNVKALVVLDNVDQDKQLDMFTGVRVDLLHKCLGRGSIVIIISRDKQILKAHGVDLIYQVKPLNDNDALLLFCKKAFKNNYIMSDFEKLTYDVLSHCKGVLHWRSVLTSLRENKSKSIMNVLRISFDQLEDTHKEIFLDIACF…
HK_NBARC_NBARC.Chr06.9	Chr06	TGFam.PM	42437050	42440932	ATGGCTTCTACTTCTAATGCCATCATCCAATGCACCTCTTCTTCTTCTTCTTCGTTTCAGTATGACGTGTTTGTGAGCTTCCGCGGTGAAGACACACGCAACAGCTTCACCGGTTTTCTTTTTGAAGCTCTGAAAAAACAAGGCATCGAGGCCTTCAAAGATGATAAAGATATCAGGAAAGGCGAATCCATAGCACCAGAGCTAATACGAGCCATTGAAGGGTCTCACGTTTTCGTTGTTGTCTTTTCCAAGGACTATGCTTCCTCAACTTGGTGCCTGCGTGAACTAGCACATATCTGGAATTGCATTCAAACATCACGCAGACCTCTTCTGCCCATTTTTTATGATGTTGATCCATCACAAGTGCGAAAACAGAGTGGAGACTATCAGAAAGCCTTT…	MASTSNAIIQCTSSSSSSFQYDVFVSFRGEDTRNSFTGFLFEALKKQGIEAFKDDKDIRKGESIAPELIRAIEGSHVFVVVFSKDYASSTWCLRELAHIWNCIQTSRRPLLPIFYDVDPSQVRKQSGDYQKAFSQHQQSSKFQEKEITTWRKVLEQVAGLCGWDIRNKQQHAVIEEIVQQIKNIVGCKFSILPYDNLVGMESHFAKLSKLICLGPVNDVRVVGITGMGGIGKSTLGRALYERISHQFNSRCYIHDVSKLYQRDGILGVQKQLLSQSLNERNLEIWNVSDGTLLAWKRLSNAKALIVLDNVDQDKQLDMFTGGRVDLLCKCLGRGSMVIIISRDKQILKAYGVDLIYQVKPLNNNDALRLFCKKAFKNNYIMSDFEKLTSDVLSHCKGHP…
HK_NBARC_NBARC.Chr06.10	Chr06	TGFam.ISGAP	42464553	42468764	ATGGCTTCTGCTTCTAATGCCATCATCCAATGCACCTCTTCTTCTTCTTCTTCGTTTGAGTATGACGTGTTTGTGAGCTTCCGCGGTGAAGACACACGCAACAGCTTCACCGCTTTTCTTTTTGAAGCTCTGAAAAAACAAGGCATCGAGGCCTTCAAAGATGATAAAGATATCAGGAAAGGCGAATCCATAGCACCAGAGCTAATACGAGCCATTGAAGGGTCTCATGTTTTCCTTGTTGTCTTTTCCAAGGACTATGCTTCCTCAACTTGGTGCCTGCGTGAACTAGCACATATCTGGAATTGCTTTCAACCATCTACCAGACATCTTCTGCCTATTTTCTATGATGTTGATCCATCACAAGTGCGAAAACTGAGTGGAGACTATGAGAAAGCCTTT…	MASASNAIIQCTSSSSSSFEYDVFVSFRGEDTRNSFTAFLFEALKKQGIEAFKDDKDIRKGESIAPELIRAIEGSHVFLVVFSKDYASSTWCLRELAHIWNCFQPSTRHLLPIFYDVDPSQVRKLSGDYEKAFAQHQQSSRFQEKEITTWREVLERVASLSGWDIRNKEQPTVIDEIVQKIKKIVGCKFSILRNDNLVGMESHFSTLSKQLGPVNDVRVVGITGMGGIGKSTLGRALYERISHQFNSSCYIDDVSKLYRLEGSAGVQKDLLSQSLNETNLKIWNLSYGTELAWRRLHNAKALIVLDNVEEDKQLNMFTANRKNLLRERLGRGSIVIIISRDQQILKARGADLIYQVKPLDDTDALRLFCKNAFKNNYIMSDFKTLTSHVLSHCEGHPLA…
HK_NBARC_NBARC.Chr06.11	Chr06	TGFam.ISGAP	42529868	42533810	ATGGCTTCTACTTCTAAGGCCATCATCCAATGCACCTCTTCTTCTTCTTCTTCTTCGTTTGAGTATGACGTGTTTGTGAGCTTCCGCGGTGAAGACACACGCAACAGCTTCACCGCTTTTCTTTTTGAAGCTCTGAAAAAACAAGGCATCGAGGCCTTCAAAGATGATAAAGATATCAGGAAAGGCGAATCCATAGCACCAGAGCTAATACGAGCCATTGAAGGGTCTCATGTTTTCCTTGTTGTCTTTTCCAAGGACTATGCTTCCTCAACTTGGTGCCTGCGTGAACTAGCACATATCTGGAATTGCATTCGAACATCTTCCAGACTTCTTCTGCCTATTTTCTATGATGTTGATCCATCACAAGTGCGAAAACAGAGTGGAGACTATGAGAAAGCC…	MASTSKAIIQCTSSSSSSSFEYDVFVSFRGEDTRNSFTAFLFEALKKQGIEAFKDDKDIRKGESIAPELIRAIEGSHVFLVVFSKDYASSTWCLRELAHIWNCIRTSSRLLLPIFYDVDPSQVRKQSGDYEKAFSQHQQSSRFQEKEIKRWRKVLKHVGNLSGWDIRNKQQHAVIEEIVQRIKNILGCKFSTLPCDNRVGMESHFATLSKLIFLGPVNDDVRVVGITGMGGIGKSTLGQALYESISHQFNSCCYIDDVRKIHKREGPLGVQKQLLSQSLNERNLEICNVSDGTHLAWKRLHNAKALIVLDNVDQYKQLDMFTRGSVDLLRERLGKGSIVIIISRDQQILKAHGVDLIYQVKPLNYTDALRLFCKKAFKNNNMMSDFEKLTSDVLSYCQG…
HK_NBARC_NBARC.Chr06.12	Chr06	TGFam.PM	42807602	42811532	ATGGCTTCTACTTCTAATGCCATCATCCAATGCACCTCTTCTTCTTCTTCTTCTTCGTTTGAGTATGACGTGTTTGTGAGCTTCCGCGGTGAAGACACACGCAACAGCTTCACCGGTTTTCTTTTTGAAGCTCTGAAAAAACAAGGCATCGAGGCCTTCAAAGATGATAAAGATATCAGGAAAGGCGAATCCATAGCACCAGAGCTAATACGAGCCATTGAAGGGTCTCATGTTTTCCTTGTTGTCTTTTCCAAGGACTATGCTTCCTCAACTTGGTGCCTGCGTGAACTAGCACATATCTGGGATTGCATTCAAAAATCACCCAGACATCTTCTGCCTATTTTCTATGATGTTGATCCATCACAAGTGCGAAAACAGAGTGGAGACTATGAGAAAGCC…	MASTSNAIIQCTSSSSSSSFEYDVFVSFRGEDTRNSFTGFLFEALKKQGIEAFKDDKDIRKGESIAPELIRAIEGSHVFLVVFSKDYASSTWCLRELAHIWDCIQKSPRHLLPIFYDVDPSQVRKQSGDYEKAFAQHQQSSRFEDKEIKTWREVLNDVGNLSGWDIKNKQQHAVIEEIVQQIKNILGCKFSTLPYDNLVGMESHFATLSKLICLGLVNDDVRVVGITGMGGIGKSTLGQALYERISHQFNSRCYIDDVSKLYQGYGTLGVQKELLSQSLNEKNLKICNVSNGTLLVWERLSNAKALIILDNVDQDKQLDMFTGGRNDLLRKCLGKGSIVIIISRDQQILKAHGVDVIYRVEPLNDNDALGLFCKKAFKNNYMMSDFEKLTSDVLSHCQG…
HK_NBARC_NBARC.Chr06.13	Chr06	TGFam.AUG	42850564	42854542	ATGGCTTCTACTTCTAATGCCATCATCCAATGCACCTCTTCTTCTTCTTCTTCTTCGTTTCAGTATGACGTGTTTGTGAGCTTCCGCGGTGAAGACACACGCAACAGCTTCACCGCTTTTCTTTTTGGAGCTCTGAAAAAACAAGGCATCGAGGCCTTCAAAGATGATAAAGACATCAGGAAAGGCGAATCCATAGCACCAGAGCTAATACGAGCCATTGAAGGGTCTCATGTTTTCCTTGTTGTCTTTTCAAAGGACTATGCTTCCTCAACTTGGTGCCTGCGTGAACTAGCACATATCTGGGATTGCATTCAAACATCACACAGACCTCTTCTGCCTATTTTTTATGATGTTGATCCATCACAAGTGCGAAATCAGAGTGGAGACTATCAGAAAGCC…	MASTSNAIIQCTSSSSSSSFQYDVFVSFRGEDTRNSFTAFLFGALKKQGIEAFKDDKDIRKGESIAPELIRAIEGSHVFLVVFSKDYASSTWCLRELAHIWDCIQTSHRPLLPIFYDVDPSQVRNQSGDYQKAFAQHQQSSRFQEKEIKTWREVLEQVASLSGWDIRNKQQHPVIEEIVQQIKNILGCKFSILPYDYLVGMESHFAKLSKLICPGPVNDDVRVVGITGMGGIGKSTLGRALYERISHQFNSRCYIDDVSKLYQGYGTLGVQKELLSQSLNERNLEICNVSNGTLLVWERLSNAKALIVLDNVDQHKQLDMFTGGRNDLLGKCLGKGSIVIIISRDQQILKAHGVDVIYRVEPLNDNDALRLFCKKAFKNNCMMSDFEKLTYHVLSHCKG…
HK_NBARC_NBARC.Chr06.14	Chr06	TGFam.PM	42869478	42881733	ATGGCTTCTACTTCTAATGCCATCATCCAATGCACCTCTTCTTCTTCTTCTTCTTCGTTTCAGTATGACGTGTTTGTGAGCTTCCGCGGTGAAGACACACGCAACAGCTTCACCGCTTTTCTTTTTGGAGCTCTGAAAAAACAAGGCATCGAGGCCTTCAAAGATGATAAAGACATCAGGAAAGGCGAATCCATAGCACCAGAGCTAATACGAGCCATTGAAGGGTCTCATGTTTTCCTTGTTGTCTTTTCAAAGGACTATGCTTCCTCAACTTGGTGCCTGCGTGAACTAGCACATATCTGGGATTGCATTCAAACATCACACAGACCTCTTCTGCCTATTTTTTATGATGTTGATCCATCACAAGTGCGAAATCAGAGTGGAGACTATGAGAAAGCC…	MASTSNAIIQCTSSSSSSSFQYDVFVSFRGEDTRNSFTAFLFGALKKQGIEAFKDDKDIRKGESIAPELIRAIEGSHVFLVVFSKDYASSTWCLRELAHIWDCIQTSHRPLLPIFYDVDPSQVRNQSGDYEKAFAQHQQSSRFQEKEIKTWREVLEQVASLSGWDIRNKQQHPVIEEIVQQIKNILGCKFSILPYDYLVGMESHFAKLSKLICPGPVNDDVRVVGITGMGGIGKSTLGRALYERISHQFNSRCYIDDVSKLYQGYGTLGVQKELLSQSLNERNLEICNVSNGTLLVWERLSNAKALIVLDNVDQHKQLDMFTGGRNDLLGKCLGKGSIVIIISRDQQILKAHGVDVIYRVEPLNDNDALRLFCKKAFKNNCMMSDFEKLTYHVLSHCKG…
HK_NBARC_NBARC.Chr06.15	Chr06	TGFam.ISGAP	43178247	43181419	ATGGAATCCAGTGTTGAAGAATTAGAAAAGTGTTTAGTATTGGAGTCGGTTAGTGACGTTCGGGTTGTCGGAATTAGTGGAATGGGAGGAATAGGAAAGACAACTCTTGCCCGTGCTTTATACGAAAAGATTGCTGATCAATATGATTTTCATTGTTTTGTTGATGATGTAAATAATATTTATCGACATTCTAGTTCACTAGGTGTACAAAAACAGTTACTTTCTCAGTGCCTAAATGATGAAAATCTAGAGATTTGCAATGTTTCTAAGGGAACATATTTGGTATCGACTATGCTACGCAATAAAAGAGGACTTATAGTTCTTGATAATGTTGGTCAGGTTGAACAATTACATATGTTTACACGGAGTAGAGAGACTCTATTACGTGAATGTCTAGGT…	MESSVEELEKCLVLESVSDVRVVGISGMGGIGKTTLARALYEKIADQYDFHCFVDDVNNIYRHSSSLGVQKQLLSQCLNDENLEICNVSKGTYLVSTMLRNKRGLIVLDNVGQVEQLHMFTRSRETLLRECLGGGSRIIITSRDEHILRTHGVNHVYQVQPLSWDNAVKLFCINAFKCTYIMSDYEMLTHGVLSHAQGHPLAIEVIGKSLFGRNVSQWTSTLDRLRDNKSRNIMDVLRISYDDLEEKDREIFLDIACFFNDDHEQHVKEILNFRGFDPEIGLPILVEKSLITISDGLIHMHDLLRDLGKCIVREKSPKEPRKWSRLWDFEDIYKVMSDNIEAKNLEAIVVKYISWRVLGTTMRVDALSKMRNLKLLMFPIAWTFSGNLNYLSNELGYLY…
HK_NBARC_NBARC.Chr06.16	Chr06	TGFam.AUG	43220678	43228323	ATGGCTTCTAACACCATCATCCAATACAACTCTTCTTCTTCATCCCATGCGATCAGGACTACATATGACGTGTTTTTCAGCTTCCGCGGTAAAGACACGCGCAACAACTTCACTGCTTTTCTCTTTGATGCTCTCTCTCAAAATGGCATACATGCCTTCAAAGATGATACGCATCTTCAGAAAGGCGAATCCATAGCACCCGAGCTGCTACAGGCCATTCAAGGGTCTCGCCTTTTCCTTGTGGTATTCTCTAAGAACTATGCTTCCTCAACTTGGTGTTTGCGTGAACTTGCACACATCTGCAACTGCACTGATGAAGCATCCCCGAGTCATGTTCTTCCGATTTTCTATGATGTTGATCCATCAGAGGTGCGGAAACAGAGTGGTTATTATGGGATA…	MASNTIIQYNSSSSSHAIRTTYDVFFSFRGKDTRNNFTAFLFDALSQNGIHAFKDDTHLQKGESIAPELLQAIQGSRLFLVVFSKNYASSTWCLRELAHICNCTDEASPSHVLPIFYDVDPSEVRKQSGYYGIAFAEHEERFREDMEKMEEVQRWRAALIRVANLSGWDIRNKSQPALIKEVVQNIKYILGPNFQNLPNGNLVGMESSLEELEKCLRLESVNGVRVVGISGMGGIGKTTLARALYEKISDQYDFHCFVNDVNKIYQHSGSLGIQKQLLSQCLNDENLEICNVSKGTYMVSTMLRSKQGLIVLDNVNKDEQLCMFTGGRETLLHECFGEGSRIIIISRNEHILRTYGVNHAYQVRPLNQDNAVKLFCINAFHCNYIMSHPLAIKVIGKSL…
HK_NBARC_NBARC.Chr06.17	Chr06	TGFam.ISGAP	43245913	43247973	ATGGCTTCTTCTTCATCTCATGCGATCATCACTACATATGATGTGTTTGTCAGCTTCCGCGGTGAAGACACGCGCAACAACTTCACTGCTTTTCTCTTTCATGCTCTCTTTGAAAATGGCATCGATGCCTTCAAAGATGATAGACATCTTCAGAAAGGCGAATCCATAGCACCCAAGCTGCTACAGGCCATTCAAGGGTCTCGCCTTTTCGTTGTGGTCTTCTCTAAGAACTATGCTTCCTCAACTTGGTGCTTGCGTGAACTTGCACACATCTGCAACTGCTCTATCGAAGCATCCCCGAGTCGTGTTCTTCCAATTTTCTATGATATTGATCCATCAGAGGTGCGGAAACAGAGTGGTTATTATGGGATAGCCTTTGCAGAACACGAAGAAAGATTC…	MASSSSHAIITTYDVFVSFRGEDTRNNFTAFLFHALFENGIDAFKDDRHLQKGESIAPKLLQAIQGSRLFVVVFSKNYASSTWCLRELAHICNCSIEASPSRVLPIFYDIDPSEVRKQSGYYGIAFAEHEERFREDKVKMEELQRWREALTQVANLSGWDIRDRSQPAMIKEIVQKINYILGLKFQNLPNGNLVGMEPRVEELEKCLALESVSDLRVVGISGMGGIGKTTLALALYKKIAHQYDVHCFVDVENSDRGQSSSLGVQKDLLQQCLNGENLEIWGVFRGTYMSSSRLRNKRGLIVLDNIDQDEQQCMFTLLRECLGGGSTLIIISRNEHILRTLGVHHVYQVQPLNQYNAVHLFYKNAFKCDHIMSGWQNIFIPRIVSYAQGHPLAIEVIGK…
HK_NBARC_NBARC.Chr06.18	Chr06	TGFam.PM	43328382	43339286	ATGGCTTCTAACACCATCATCCAATACAGCTCTTCTTCTTCATCTCGTGCGATCATCACTACGTATGATATGTTTGTCAGCTTCCGCAGTGAAGACACGCGCAACAACTTCACTAATTTTCTCTATGATGCTCTCTCTCAAAATTGCATCCATGCCTTCAAAGATGATGCAGATCTCAAGAAAGGCGAATCCATAGCACCTAAGCTGCTACAGGCCATTGAAGGGTCTCGCCTTTTCGCTGTGGTCTTCTCTAAGAACTATGCTTCCTCAACTTGGTGCTTGGGTGAACTTGCACACATCTGCAACTGCACTATTGAAGCATCCCGGGGTCGTGTTCTTCCAATTTTCTATGATGTTGATCCATCAGAGGTGCGGAAACAGAGTGGTTATTATGGGATA…	MASNTIIQYSSSSSSRAIITTYDMFVSFRSEDTRNNFTNFLYDALSQNCIHAFKDDADLKKGESIAPKLLQAIEGSRLFAVVFSKNYASSTWCLGELAHICNCTIEASRGRVLPIFYDVDPSEVRKQSGYYGIAFEEHEGRFREDKEKMEEELRWREALTQVANLSGWDIRNKSQPAMIKEIVQNIKYILGPKFQNPPNGNLVGMESSVEELEKCLALESISDVRVVGISGMGGIGKTTLARALYEKIADQYDFHCFVDDVNNIYRHSSSLGVQKQLLSQCLNDENLEICNVSKGTYLVSTMLRNKRGLIVLDNVGQVEQLHMFTRSRETLLRECLGGGSRIIITSRDEHILRTHGVNHVYQVQPLSWDNAVKLFCINAFKCTYIMSDYEMLTHGVLSH…
HK_NBARC_NBARC.Chr06.19	Chr06	TGFam.ISGAP	43361680	43366246	ATGGCTTCTAATGCGACCATCCCTACATATGATGTGTTTGTCAGCTTCCGCGGTGAAGACACGCGCAACAGCTTCACTGCTTTTCTCTTTGATGCTCTCTCTCAAAATGGCATCCATGCCTTCAAAGATGATACACATCTTCAGAAAGGCGAATCCATAGCGCCCGAGCTGCTACAGGCCATTCAAGGGTCTCGCCTTTTCCTTGTGGTCTTCTCTAAGAACTATGCTTCCTCAACTTGGTGCTTGCGTGAACTTGCACACATCTGCAACTGCACTATTGAAGCATCCCCGAGTCGTGTTCTTCCAATTTTCTATGATGTTGATCCATCAGAGCTGCGGAAACAGAGTGGTTATTATGGGATTGCCTTTGCAGAACACGAACGAAGATTCAGAGGAGAT…	MASNATIPTYDVFVSFRGEDTRNSFTAFLFDALSQNGIHAFKDDTHLQKGESIAPELLQAIQGSRLFLVVFSKNYASSTWCLRELAHICNCTIEASPSRVLPIFYDVDPSELRKQSGYYGIAFAEHERRFRGDKEKMEEVQRWREALTQVANISGWDIQNKSQPTVIKEIVQKIKCILGPNFQNLPNGSLVGMESHVKELEKCLELESVSDSRVRVVGISGMGGIGKTTLAHALYKKIAHQYDFHCFVDVGTQSNSLGVQKESLHHCLNGENLQICDVFTGTHMISSRLRNKRGFIVLDNVSWDEQLCMTLLREYLGEGSIIIIISRNEHILRTHGANHVYQVQPLNHNNAVQLFCKNAFKCDYIMSGYEMLTRYVLSHAEGHPLAIKVIGNFLYGRNV…
HK_NBARC_NBARC.Chr06.20	Chr06	TGFam.ISGAP	43385793	43391326	ATGGTGATATACGACGTGTTTGTGAGTTTCTGCAGTGAAGACACTGGCAACAACTTCACTGGTTTTCTTTTTCAAGCTCTCCATCTACATGGCATTCAGACCAACAACGATGATGCAGATCTCAGGAAAGCCGAATCCATACCCATAGAAGAGTCTCGCCTTTTCATCGTGGTCTTCTCTAAGAACTATGCTTCCTCAACTTTGTGCTTGCAGGAACTGGCAAAGATCTGCAATTGCATTGAAGCATCATCAAGACGTGTTCTGCCTATTTTTTATGATGTTGATCCTTCACATGTGCGAAAGCAGAGTGGATTTTATGATGAAGCCTTATCCCAACATGAAAAAAGGTTTCAAGAAGATAAAGTGAAGATGGAAGAAGTGCAAAAATGGAGAAAAGAT…	MVIYDVFVSFCSEDTGNNFTGFLFQALHLHGIQTNNDDADLRKAESIPIEESRLFIVVFSKNYASSTLCLQELAKICNCIEASSRRVLPIFYDVDPSHVRKQSGFYDEALSQHEKRFQEDKVKMEEVQKWRKDLESVAGIIGSDIRNKNQCTEIENIVREACGILRIKFSSHPNDELFRFSQMFSSSSSDAIKKYDVFVSFRGEDTRNNFTAFLLQALRRKGINAFKDDENLKKGEFIEPELREAIEGSRIFIVVFSKNYASSTWCLGELAHICYCIETSRRPVLPIFYDVDPLEVRKQSGCYEKAFVEHEERFIEDSKKMKEVHRWREALKQVANFKSGWDIRNKAQYAEIEQIVETINYELDSKSCPNDDIDGVSQIFSSFSSPTRPTYDVFVSFCG…
HK_NBARC_NBARC.Chr06.21	Chr06	TGFam.AUG	43402289	43405473	ATGGCTTCTAACACCATCATCCCATGCGGCTCTTCTTCTTCATCTCATGCGATCATCACTGCATATGATGTGTTTGACAGCTTCCGCGGTGAAGACACGCGCAACAACTTCACTGCTTTTCTCTTTGATTCTCTCTCTCAAAATGGCATCCATGCCTTCAAAGATGATACGCATCTTCAGAAAGGCGAGTCCATAGCACCCGCGCTGCTACAGGCCATTGAAGAGTCTCGCCTTTTCCTTGTGGTCTTCTCTAAGAACTATGCTTCCTCAACTTGGTGGTTGCGTGAACTTGCACACATCTGCAACTGCACTATTGAAGCATCCCCGAGTCGTGTTCTTCCAATTTTCTATGATGTTGATCCATCAGAGGTGCGGAAACAGAGTGGTTATTATGGGATA…	MASNTIIPCGSSSSSHAIITAYDVFDSFRGEDTRNNFTAFLFDSLSQNGIHAFKDDTHLQKGESIAPALLQAIEESRLFLVVFSKNYASSTWWLRELAHICNCTIEASPSRVLPIFYDVDPSEVRKQSGYYGIDFAEHEERFKDKEKMEEVQRWREALTQVAHLSGWDIRNKSQPAMIKEIVQKIKYILGPKFQNLPNGNLVGMESRIEELEKCLALELIAHQYDVHCFVDVENSYGPGRQSNSLGVQKELLHQCLNGENLQICDVFRGYYMVSSRLHNKQGLIVLDNVSWDEQLCMFTETILRECLGEGSKIIIISRSEHILRAHGVNHVYQVQPLNHDNAVQLFCKNAFKCDYIMSDYKMLTYCVLSHVQGHPLATKIIGKSLFGLNDSQWRGTLVR…
HK_NBARC_NBARC.Chr06.22	Chr06	TGFam.ISGAP	43447362	43477329	ATGGTGATATACGACGTGTTTGTGAGCTTCTGCAGTGAAGACACTGGCAACAACTTCACTGGTTTTCTTTTTCAAGCTATCCATCTAAATGGCATTCAGACCAACAAAGATGATGCAGATCTCAGGAAAGCCGAATCCATACCCATAGAAGAGTCTCGCCTTTTCATCGTGGTCTTCTCTAAGAACTATGCTTCCTCAACTTTGTGCTTGCAGGAACTGGCAAAGATCTGCAATTGCATTGAAAAATCATCAAGACCTGTTCTGCCTATTTTTTATGATGTTGATCCTTCACATGTGCGAAAACAGAGTGAATTTTATGATGAAGCCTTTTCCCAACATGAAAAAAGGTTCCAAGAAGATAAAGTGAAGATGGTGGAAGTGCAAAAATGGAGAAAAGAT…	MVIYDVFVSFCSEDTGNNFTGFLFQAIHLNGIQTNKDDADLRKAESIPIEESRLFIVVFSKNYASSTLCLQELAKICNCIEKSSRPVLPIFYDVDPSHVRKQSEFYDEAFSQHEKRFQEDKVKMVEVQKWRKDLTRVAGIIGLDIRNKNQCTEIENIVREACGILRIKFLSNPNDELFRFCQMFSSCSSHAIKKYDVFVSFRGEDTRNNFTAFLLQALRRKGIKAFKDDENLKKGEFIAPELREAIEGSRIFIVVFSKNYASSTWCLGELAHICNCIETSRRPVLPIFYDVDPLEVRKQSGCYEKAFVEHEERFIEDSKKMKEVHRWREAMKQVANFKSSWDIRNKAQYAEIEQIVKTINYELDSKSCPNDDDIGGVSQIFSSFSSHARPTYDVFVSFR…
HK_NBARC_NBARC.Chr06.23	Chr06	TGFam.ISGAP	43528158	43532926	ATGGCTTCTAACGCCATCATCCAACACAGCTCTTCTTCTTCTTCATCTCATGCGATCATCACTAAATATGATGTGTTTGTCAGCTTCCGCGGTGAAGACACGCGCAACAACTTCACTGCTTTTCTCTTTGATGCTCTCTCTCAAAATGGCATCCATGCCTTCAAAGATGATACACATCTTCAGAAAGGTGAATCCATAGCACCCGAGCTGCTACAGGCCATTCAAGGGTCTCGCCTTTTCCTTGTGGTCTTCTCTAAGAACTATGCTTCCTCCACTTGGTGCTTGCGTGAACTTGCACACATCTGCAATTTCACTATTGAAGCATCCTCGAGTCCTGTTCTTCCAATTTTTTATGATGTCGATCCATCAGAGGTGGGGAAACAGAGTGGTTATTATGGG…	MASNAIIQHSSSSSSSHAIITKYDVFVSFRGEDTRNNFTAFLFDALSQNGIHAFKDDTHLQKGESIAPELLQAIQGSRLFLVVFSKNYASSTWCLRELAHICNFTIEASSSPVLPIFYDVDPSEVGKQSGYYGIAFAEHEGRFREDREKMEEVQRWREALTQVAHLSGWDIRNKSQPAMIKEIVQKINYILGPKFQNLPSGNLVGMESSVEELEECLELESVTDVRVVGISGMGGIGKTTLARALYEKIAYQYDVYCFVDDVNKIYRHSGSLGVQKQLLSQCLNDKNLEICNASVGTYLIGTRLCNKRGLIVFDNVSQVEQLRMFTGSRETLLLECLGGGSRIIIISRDEHILRTHGVHHVYEVQPLEDDNAVQLFCKNAFKCDYIMSDYKMLTYDVLS…
HK_NBARC_NBARC.Chr06.24	Chr06	TGFam.PM	43583825	43585738	ATGGCTTCTAAGGCCATCATCCAATACAGCTCTTCTTCTTCTTCTTCTCATGCGATCATCACTACATATGATGTGTTTGTCAGCTTCCGCGGTGAAGACACGCGCAACAACTTCACTGCTTTTCTCTTTGATGCTCTCTTTGAAAATGGCATCCATGCCTTCAAAGATGATACACATCTTCAGAAAGGCGAATCCATAGCACCCGAGCTGCTACTGGCCATTCAGGGGTCTCGCCTTTTCGTTGTGGTCTTCTCAAAGAACTATGCTTCCTCAACTTGGTGCTTGCGTGAACTTGCACACATCTGCAACTGCACTATTGAAGCATCCTCGAGTCGTGTTCTTCCAATTTTCTATGATGTTGATCCATCAGAGGTGCGGAAACAGAGTGGTTATTATGGG…	MASKAIIQYSSSSSSSHAIITTYDVFVSFRGEDTRNNFTAFLFDALFENGIHAFKDDTHLQKGESIAPELLLAIQGSRLFVVVFSKNYASSTWCLRELAHICNCTIEASSSRVLPIFYDVDPSEVRKQSGYYGIAFAEHEERFREDKVKMEELQRWREALTQMANLSGWDIRNKSQPAMIKEIVQKINYILGPKFQNLPSGNLVGMESRVEELEKCLALESVTDVRVVGISGMGGIGKTTLALALYEKIAYQYDVHCFVDDVNKIYRHSGSLGVQKQLLDQCLNDKNLEICNVSRGTYLIGTRLRNKRGLIVLDNVSQVEQLHMFTGSRETLLRECLGGGSRIIITSRDEHILRTHGVNHVYRVRPLNQDNAVQLFCNNAFKCDYIMSDYKMLTHDALW…
HK_NBARC_NBARC.Chr06.25	Chr06	TGFam.ISGAP	43820934	43823093	ATGAAGTTTGGTTCTATATTCCAACAGACCAACCTACATTCCAGCATAATAATACTAAACTTTTTTCTTCGAATGGCTAAAACATGTTCCGGTGCATCCAGATACGATGTGTTCATTAACTTCAGAGGGGAAGACACACGTTTTGCATTTACCGGGCATCTCCACAAAGCTCTTTGTAACAAGGGAATCCGTGCTTTCATGGATGAAAATGACATTAAGAGAGGAGACGAAATAAGAGCAACACTTGAGGAGGCAATTAAAGGGTCGAGGATTGCCATCACTGTGTTCTCTAAAGACTATGCTTCTTCCTCATTTTGCTTAGATGAACTTGCAACCATCCTTGGCTGCTACCGCGAGAAAACTCTGTTGGTTATTCCTGTCTTTTATAAGGTGGATCCT…	MKFGSIFQQTNLHSSIIILNFFLRMAKTCSGASRYDVFINFRGEDTRFAFTGHLHKALCNKGIRAFMDENDIKRGDEIRATLEEAIKGSRIAITVFSKDYASSSFCLDELATILGCYREKTLLVIPVFYKVDPSDVRRLQGSYAEGLARLEERFHPNMENWKKALQKVAELAGHHFKDGAGYEFKFIRKIVDDVFDKINKAEASIYVADHPVGLHLEVEKIRKLLEAGSSDAISMIGIHGMGGVGKSTLARAVYNLHTDHFDDSCFLQNVREESNRHGLKRLQSILLSQILKKEINLASEQQGTSMIKNKLKGKKVLLVLDDVDEHKQLQAIVGKSVWSESEFGTRLVLIITTRDKQLLTSYGVKRTHEVKELSKKDAIQLLKRKAFKTYDEVDQSYNQ…
HK_NBARC_NBARC.Chr06.26	Chr06	TGFam.PM	43827385	43832317	ATGGCTGCGACAACACGTTCCCTTGCATCCTACGATGTGTTCCTCAGCTTCAGTGGTTTAGACACACTCTATGGTTTCACTGGCAACCTCTACAATGCTCTTTATGACAGGGGAATCTACACTTTCATTGATGATCAGGAGCGTTCGAGAGGAGACGAAATAGCACCTGCACTTTCCAAGGCAATTCAAGAGTCCAGGATTGCTATTACTGTGCTTTCTGAAAACTATGCTTTTTCCTCATTTCGTTTAAATGAACTTGTAACCATCCTTGACTGCAAGAGTGAAGGGCTGTTGGTTATACCGGTCTTTTACAACGTAGATCCTTCTGATGTCAGACACCAGAAAGGTAGTTATGGAGAAGCAATGACTTACCATCAGAAGAGGTTCAAAGCTAACAAG…	MAATTRSLASYDVFLSFSGLDTLYGFTGNLYNALYDRGIYTFIDDQERSRGDEIAPALSKAIQESRIAITVLSENYAFSSFRLNELVTILDCKSEGLLVIPVFYNVDPSDVRHQKGSYGEAMTYHQKRFKANKEKLQKWRMALHQVADLSGYHFKDGDSYEYKFIGSIVEEVSRKISRPSLVGLESQVTEVMKLLDVGSHDVVHIIGIHGMGGSGKTTLAREVYNLIALHFDESCFLQNVREESNKHGLRHLQSILLLELLGEKNITLTSWREGASMIRHRLRQKKVLLILDDVDKHKQLRAMVGRSGWFGAGSRVIITTRDKHLLKYHGVERTYEVEVLNHNTALQLLTWNAFKREKIDPSYEDVESALEHYKRSPGNEIILEILKVSFDALGEEQKN…
HK_NBARC_NBARC.Chr06.27	Chr06	TGFam.PM	43928224	43929204	ATGATAAAAAATAAGCTCAGAGGAAAGAAGGTTCTCTTAGTTCTAGATGATGTTGATGAGCACAAGCAATTACAGGCAATTGTTGGAAATTCTGATTGGGAGTCTAAGTCTGGCACCAGAGTGGTTCTGATCATCACCACTCGGGACAAACAACTCCTAACATCTTATGGGGTCAAAATAACACATGAGGTGAAAGAATTGGATACGGATGATGCTATTCAATTGCTTAAATGGAAAGCTTTTAAAACATATGATGAAGTTGATCAAAGTTACAAGCAGGTCTTGAATGATGTAGTAACTTGGACTTCTGGCCTTCCATTGGCTTTGGAAGTGATAGGTTCGAACCTGTTTGGAAAAAGTATTAAAGTATGGGAATCAGCTATCAAACAATATCAAAGA…	MIKNKLRGKKVLLVLDDVDEHKQLQAIVGNSDWESKSGTRVVLIITTRDKQLLTSYGVKITHEVKELDTDDAIQLLKWKAFKTYDEVDQSYKQVLNDVVTWTSGLPLALEVIGSNLFGKSIKVWESAIKQYQRIPNQEIFKILKVSFDALEEEEKSVFLDITCCVKGHKRTEIEDILHSLYDNCMKYHIEVLVDKSLMQISDNDRVTFHDLIENMGKEIDRQKSPKEIGKRRRLWLLEDIIQVLEDNPGTSEVKIIRLDFPISDKQETSIEWNAFNDMENLKALIIRNDI*
HK_NBARC_NBARC.Chr06.28	Chr06	TGFam.ISGAP	43992527	43994701	ATGAAGTTTGATTCTATATTCCAACAGACCAACCTACATTCCGGCATAATAATACTAAACTTTTTTCTTCTAATGGCTGAAACATGTTCCGGTGCATCCAGATACGATGTGTTCATTAACTTCAGAGGGGAAGACACACGTTATGAATTTACTGGGCATCTCCACCAAGCTCTTTGTAAGAAGGGAATCCGTGCTTTCTTTGATGAAGAGGACCTTCAGACAGGAGACGAAATAACAACAAAACTTGAGGAGGCAATTAAAGGGTCGAGGATTGCCATCACTGTGTTCTCTAAAGGTTATGCTTCTTCCTCATTTTGCTTAAATGAACTTGCAACCATCCTTGGCTGCTACCGCGAGAAAACTCCACTGTTGGTTATTCCTGTCTTTTATAAGGTGGAT…	MKFDSIFQQTNLHSGIIILNFFLLMAETCSGASRYDVFINFRGEDTRYEFTGHLHQALCKKGIRAFFDEEDLQTGDEITTKLEEAIKGSRIAITVFSKGYASSSFCLNELATILGCYREKTPLLVIPVFYKVDPSDVRHQRGSYEQGLDSLEKRLHPNMEKWRTALHEVAGFSGHHFTDGAGYEYQFIEKIVDDVFRKINEAEASIYVADHPVGLDSLVLEIRERLEAESSDAISMIGIHGMGGVGKSTLARQVYNLHTNQFDYSCFLQNVREESNRHGLKRLQSILLSQILKQGINLASEQQGTWMIKNQLRGKKVLLVLDDVDEHKQLQAFVGKSVWPESQSESKSGTRLVLIITTRDKQLLTSYGFKRTYEVKNLSTNDAIQLLKQKAFKTCDEVD…
HK_NBARC_NBARC.Chr06.29	Chr06	TGFam.AUG	43997074	44002749	ATGGCTTCTAACGCCATCATCCAATACGGCTCTTCTTCTTCTTCTTCATCTCATGCGATCATCACTGCATCTGATGTGTTTGTCAGCTTCCGCGGTGAAGACACGCTCAACAACTTCACTGTTTTTCTCTTTGATGCTCTCTCTCAAAATGGCATCGATGCCTTCAAAGATGATACACATCTTCAGAAAGGCGAATCCATAGCACCCGAGGTGCTACAGGCCATTGAAGAGTCTCTCCTTTTCCTTGTGGTCTTCTCTAAGAACTATGCTTCCTCAACTCGGTGCTTGCGTGAACTTGCACACATCTGCAACTGCACCGATGAAGCATCCCCGAGTCGTGTTCTTCCAGTTTTCTATGATGTTGATCCATCAGAGGTGCGGAAACAGAGTGGTTATTAT…	MASNAIIQYGSSSSSSSHAIITASDVFVSFRGEDTLNNFTVFLFDALSQNGIDAFKDDTHLQKGESIAPEVLQAIEESLLFLVVFSKNYASSTRCLRELAHICNCTDEASPSRVLPVFYDVDPSEVRKQSGYYGIAFAEHERRFREDIEKMEEVLRWREALTQVANISGWDIRNKSHPAMIKEIVQKIKYILGPKFQNFPNGNLVGMESRVEELEKCLALELVGDVRVVRISGIGGIGKTTLALAFTGGTDTLLSECLGEGSRIVIICKDEQLLRTHEVYHVYRVQPLNRHIAVQLFCKNAFKCDYIMSDYETLTHDVLSHAQGHPLAIEVISKSLHCRNVSQWRGRLVRLSDKVSKHTLKVLGIRSFCNPVRCLFPSFSIFSCIRELDLSFCNLLKIP…
HK_NBARC_NBARC.Chr06.30	Chr06	TGFam.ISGAP	45691888	45696125	ATGGCTTCCAACAACAACAGCAGCAGCAGCAGCATCATCGTCCAACATTGCAACTACTCTTCATATGACGTGTTTGTGAGCTTCAGAGGTAAGGACACACGCAACAATTTTACTGATCATCTTTTTGGTGCATTCCATAGGAAAAAAATTCGTACATTTAGGGATGACACAAGGCTGAAGAAAGGGGAACGTATACTATCCAACCTCATGCAAGCAATTGAGGGGTCTCAGATTTTTGTCATTGTCTTCTCAAAGAACTATGCTTTTTCATCATGGTGCTTGAAAGAACTTGCTAAGATCCTTGATTGTGTTAGAGTCTCCGGAAAACATGTTCTGCCTATTTTTTACGATGTTGATCCATCTGAAGTGCGAAATCAGACGGGGGATTATGAGAAAGCC…	MASNNNSSSSSIIVQHCNYSSYDVFVSFRGKDTRNNFTDHLFGAFHRKKIRTFRDDTRLKKGERILSNLMQAIEGSQIFVIVFSKNYAFSSWCLKELAKILDCVRVSGKHVLPIFYDVDPSEVRNQTGDYEKAFAKHEDREKMEEVKRWREALTQVANLAGWDMRNKSQYAEIEKIVQEIISKLGHNFSSLPNDLVGMESPVEELEKLLLLDLTDDVRIVGICGMGGIGKTTLATVLYDRISHQFDAHCFIDNVSKTYRHCGQIGVLKQLLHQTLNEDLQICNLYHAANLMQSRLRYVKSIIVLDNVNEVEQLEKLVLNREWLGAGSRIIIISRDKHVLKKCGVTVVYKVQLLNGANSLKLFCKKAFDSVDITGDYEELKYEVLKYANDLPLAIKVLGS…
HK_NBARC_NBARC.Chr06.31	Chr06	TGFam.ISGAP	47979743	47985828	ATGGCTGTGATGCTGTGTGGAGGAGCTTCATCTTCTGCTTTTGGCCGCGGATGGACTTATGATGTGTTCTTGAGTTTCAGAGGTGAGGATACAAGGAGAACCTTCACAGGCTCTCTATATCATGGTTTGCACCAAAGGGGTATCAATGTTTTCATAGATGATGAGAAGCTTAGGAGAGGGGAAGAGATATCCCCTGCTCTTATTGGAGCCATTGAAGAGTCTAGGATTGCTATCATTGTGTTCTCTCAAAACTATGCATCTTCCACATGGTGTCTTGATGAGCTTGCAAAGATCCTTGAGTGTTACAAAACAAGAGGGCAACTTGTTTGGCCGGTTTTCTTCCATGTTGACCCTTCGGCGGTGCGCCATCAGAGAGGAAGTTTTGCGACAGCAATGGCT…	MAVMLCGGASSSAFGRGWTYDVFLSFRGEDTRRTFTGSLYHGLHQRGINVFIDDEKLRRGEEISPALIGAIEESRIAIIVFSQNYASSTWCLDELAKILECYKTRGQLVWPVFFHVDPSAVRHQRGSFATAMAKHEDRFKGDVQKLQKWKMALFEAANLSGWTLKNGYEFKLIQEIIEEASRKLNHTILHIAEYPVGIENRISELKLLLHIEPGEDIRVIGIYGLGGIGKTTIARALYNLIAGQFEATSFLTDIRESSNQRQGLVQLQETLLFDTVGDKNIKLGSIYKGIPIIKKRLCCKKVLLILDDVDKLEQLQALAGGRDWFGFGSVIIITTRDKHLLAAQQVDKTYEVKKLNHDEAFDLFTWSAFKRKAPDAGYFDISNRVVLYAEGLPLALKVM…
HK_NBARC_NBARC.Chr06.32	Chr06	TGFam.ISGAP	48095021	48096040	ATGGGTTCCCTTTTTATTGAAGAAACTGAAATTGTAGGATTTAAATTGCCAAGAGATGAATTGGTTGGTTGGCTGTTGAAGGGCACAGAAGAGCGAACAGTGATTTCAGTGGTAGGGATGGGAGGACTTGGAAAAACCACTCTTGCCAAGCATGTTTTTGATAGTGAAAAAGTAAAAGGTCACTTTGATTATCGTGCTTGCATCACAGTTTCTCAATCATACAGTGTCAGAGGGTTATTCATAGAAATGATAAAGCAATTTTGTAGGGAGGCAAAAGACCCTCTTCCAGAAATGTTACACGAAATGGACGAGAAGTCACTAATTTCTGAAGCGAGGCAATACTTGCAGCACAAAAGGTATTTGATATTCTTTGATGATGTATGGCATGAAGATTTTTGT…	MGSLFIEETEIVGFKLPRDELVGWLLKGTEERTVISVVGMGGLGKTTLAKHVFDSEKVKGHFDYRACITVSQSYSVRGLFIEMIKQFCREAKDPLPEMLHEMDEKSLISEARQYLQHKRYLIFFDDVWHEDFCDQVEFAMPNNNRSSRIIITTRMMHVAEFFKKSFPVHILSLQLLPPDKAWELFCKKAFRFELHGQCPALLEGMSNEIVRKCKGLPLAIVAIGGLLSTKSKTVFEWQKVNQNLNLELQRNAHLTSITKILSLSYDDLPYYLKPCILYFGIYPQDYSINHNRLTRQWIAEGFVQSDGRRTSEQIADEYLSELIYRSLVQVSTVGFEGKV*
HK_NBARC_NBARC.Chr06.33	Chr06	TGFam.ISGAP	48102673	48105507	ATGGCAGAAACTGCAGTATCTTTTGCCTTGGAAAGAGTGTTCCAAATCCTAACGGAAGAAACAAACCTGCTAAGAGGCACCCACAAAGATTTTTTAGGCATCAGAGATGAACTAGAGAGCATTCAAGCTTTCCTCAAAGATGCAGATAGAAGGGCTGCAGATGAAGCCAACACCAAGGCTGGAATCAGAACATGGGTGAAGCAGGTCAGAGAAGCATCATTTCGAATAGAAGATGTCATTGATGAATACCTCAGGGTGATTCATGGGGTCCAACATCTTGGATGTGGGGCTTCAATTTGCAAGATTACGAGCCTCATCAGCACAGTGACTTCTCGTCATCAGATAGCAACTGAGATTCAGGACATCAAAGTGTCACTTTCTCTAATCAAGGAAAGAAGT…	MAETAVSFALERVFQILTEETNLLRGTHKDFLGIRDELESIQAFLKDADRRAADEANTKAGIRTWVKQVREASFRIEDVIDEYLRVIHGVQHLGCGASICKITSLISTVTSRHQIATEIQDIKVSLSLIKERSERYKFQVSQEQQSSSNTEAIEGSRWHDSRMRSLFIEETEIVGFEFPKDELVGWLLKGTKEPTVISVVGMGGLGKTTLAKHVFCSEKVKRHFDCRACITVSQSYTVKGLFIDMIKQFCKETKNPLPEMLHEMDEKSLISEVRQYLQHKKYLIFFDDVWHEDFCDQVELAMLNNNESSRIIITTRMMHVAEFFKKSFPVHILSLQLLPPDKAWELFCKKAFRFELHGQCPALLEGMSDEIVRKCKGLPLAIVAIGGLLSTKSKTVFEW…
HK_NBARC_NBARC.Chr06.34	Chr06	TGFam.ISGAP	48109748	48112579	ATGGCAGAAACAGCAGTATCTTTTGCCTTAGGAGAAGTTTACGAAATCCTAAAGGACGAAGCAAAGCTGCTAAGAGGCATCCACAAAGACTTTTCAGACATCAAAGATGAACTAGAAAGCATTCAAGCCTTCCTCAAAGATGCAGATAGAAGGGCTGCAGATGAAGCAAACACCAATGATGGAATAAGAACTTGGGTGAAGCAGGTCAGAGAAGCATCATTTCGTATAGAAGATGTAATTGATGAATACCTCAGGGTGATTCATGTGGTCCAACATCTTGGATGTGGGGCTTCAATTTGCAAGATTACACACCTGATCAGCACATTGATTTCTCGTCATCAGATAGCAACAGAGATTCAGGACATTAAATTGTCACTTTCTGTAATTAAGGAAAGAAGT…	MAETAVSFALGEVYEILKDEAKLLRGIHKDFSDIKDELESIQAFLKDADRRAADEANTNDGIRTWVKQVREASFRIEDVIDEYLRVIHVVQHLGCGASICKITHLISTLISRHQIATEIQDIKLSLSVIKERSERYKFQVSQEQPSSSSTGGIEGSRWHDPRMSSLFIEETEIVGFELPRDELVAWLLKGTEERTVISVVGMGGLGKTTLCKHVFDSENVKSHFDCRACITVSQSYTVRGLFIDMIKQFCRETKDPLPQMLHEMDEKSLISELRQYLEHKRYLIFFDDVWHEDFCDQVEFSMPNNNKRSRIIITTRLMHVAEFFKKSFPVHVHSLQLLPPDKAWELFCKKAFRFELGGKCPAELQGMSNKIVRKCKGLPLAIVAIGGLLSTKSKTVFEW…
HK_NBARC_NBARC.Chr06.35	Chr06	TGFam.AUG	48555365	48557438	ATGGCAGAAACTGCAGTATCCATTTCTTTGGAAGAAGTTTTCCAAATCCTAAAGAAAGAAACAAACCTGTTAAGAGGCATCCACAAAGATTTTTCAGATACCAGAGATGAACTAGAAAGCATTCAAACCTTCCTCAAAGATGCAGATAGAAGGGCTGCAGCAGATGAAGCAAACACCAACGATGGAATAAGAACGTGGGTGAAGCAGGTCAGAGAAGCATCATTCCGTATAGAAGATGTCGTCTATGAATACCTCAGGATAGCAACTGAGATTCGGGATATTAAATTGTCTCTTTCTCTAATCAAGGAAAGGAGTGAAAGGCATAGTTCCCTTTTCATCAAAGAAACTGAAATTCTAGTACTTGAATTGCCAATTGATGAATTGGTTGGTTGGTTGTTG…	MAETAVSISLEEVFQILKKETNLLRGIHKDFSDTRDELESIQTFLKDADRRAAADEANTNDGIRTWVKQVREASFRIEDVVYEYLRIATEIRDIKLSLSLIKERSERHSSLFIKETEILVLELPIDELVGWLLKGTEEHTVISVVGMGGLGKTTLAKHVFYSEIVKSHFHCRACIKVSQSYTMRGLLIDMIKQFCRETNDRLPQMLQEMDEKSLISKVRQYLKQKRYLIFFDDVWHEDFCDQVEFAMPNNNKSSRIIVTTRVRHVAEFFKKSFLVHVHNLQPLLPDKAWELFCKKAFRFEPDGHCPGELEGISNEIFRKCKGLPMEIVAIGDLLPTKSKTAKVRSCQVHDLLHEVIIAKAKDLNLCHFVHGRDESGTSRITRRLSIDTSSNNVPKSSNN…
HK_NBARC_NBARC.Chr06.36	Chr06	TGFam.AUG	48724941	48729685	ATGCATGGGCCCAATATCCTACATGACAACGGAATAGATATCCTTATTTTCATCGTATCAAAGATTGCAGAATATACAGTGGGTCCAATTTTACACCATGCTAAATACTTGTGCTGCTTCAACAACTTTGTTGGAAATCTTCCAAGTGCCAAAGAAGTGACCCAAAAGAGTGTCAAGGATCGAGTTAAAGAAGCCATTAATAGGACTGAAAAGATTGAACCAACTGTTGAGAAGTGGTTGGAAGATGTTGAGAAAGTCTTGAAGGAATTGAAACTACTGGAAGGAATAATTTCAGAATTTGATCCATTTTCTAAGATTCCTGAACTTCCAGGCATGAATTACTATTCTTCCAAAGGTTTTGTTCTTTTCGAATCTAAAAAATCATCTTACAACAAACTA…	MHGPNILHDNGIDILIFIVSKIAEYTVGPILHHAKYLCCFNNFVGNLPSAKEVTQKSVKDRVKEAINRTEKIEPTVEKWLEDVEKVLKELKLLEGIISEFDPFSKIPELPGMNYYSSKGFVLFESKKSSYNKLLEALKEESVCMVGLVRIGGLGKTALAKEVGKEAEKLKLFEKIVIATVSETPNIRSIQAQISDQLGLKLEEESDIGKARRLSERLSEGTTFLILDDVGENLDFESLGIPINENKKGCGVLQITWKREVCTSMQCQCTVELNLLTGEEAWTLFKLYAKITDDSTYALKGVATKIVDECKGLPIAIVTVGSTLREKTLKDWKLALSRLQDSKPLVIPKGLRSPNAFLQLSYDNLKDELAKSFFLLCSIFPEDYEIDLEDLFRFGRGLRI…
HK_NBARC_NBARC.Chr06.37	Chr06	TGFam.AUG	48743990	48761031	ATGAAATTGTGCATAGACCTGGATCCAATGGACCCGAAGCCAAATCTTAACCCTGTCCTTACTGATGCCACACCCTTAACAAGGTCAAGGCTTGGTGTGCCTTCTGGTTTGTCACCTTACTCTCCTAAAGGGGCAACCTTTCCCCATGGTACCATGCTGGCAATACCAAGGAAGAAGACAGGAATTCTTGATGATTTTCGTTCTAGCGGTTGGCTGGATGCGATGAAATCGTCTTCTCCTACTCACAATAAAGTATCCAAGGATCTTGGTCATGGGATTGGATCACCTGATGCTGCTTATAGTACCTGGCTGCTAAAGTTTCCATCAGCACTTGCATCTTTTGATCAAATTACCAACTGTGCAAAAGGAAAGAGAATAGCATTGTTTCTGGATTATGAT…	MKLCIDLDPMDPKPNLNPVLTDATPLTRSRLGVPSGLSPYSPKGATFPHGTMLAIPRKKTGILDDFRSSGWLDAMKSSSPTHNKVSKDLGHGIGSPDAAYSTWLLKFPSALASFDQITNCAKGKRIALFLDYDGTLSPIVDNPDCAFMSDNVYEFVGLSELYYAGSHGMDIIGPPRQSNSDNHPDCIRSSDQQSWQIVGQHVYDILKEYPRLRVTHGRKVLEVRPVIDWDKGKAVTFLLESLGPLFHMGWYHLFYQYNPDSAIWGNISWGHAVSRDMIHWFYLPIAMGPDTWYDINGVWTGSATILPGGKIIILYTGDTNEYVQVQNLAYPANLSDPLLLDWVKYAGNPVLVPPPGIGPKDFRDPTTGWIGPDGKWRVAIGSKKGKKGISLVYTTTDFV…
HK_NBARC_NBARC.Chr07.1	Chr07	TGFam.PM	562412	567875	ATGGGGGGAATTGGTAAGTCAACCATTGCTAAATTCTTGTTTGCCAAACTCTTCATCCAATACGATAATGTCTGCTTCGTGGACAGTTCAAAAGAATATTCACTCGATAAGCTTTTCTCTGCGCTATTGAAGGAGGAAGTTTCCACATCAACGGTTGTAGGATCCACATTTGATATGAGGAGACTCAGTAATAAAAAGGTTTTGATTGTACTTGATGGTATGTGTAACGTCGACAATCAGGGGCGTTATCGTTTAGACTTATTGGAGTATTTATGTAAAGAGTTTGGTGACCTACATCACGAAAGCAGACTCATCATAACAACAAGAGATAAGCAATTGCTTGTCGGAAAAGTTGAATGTATACACAAGGTTAAGAAATTGAAAAGTCCAGAATCTCTA…	MGGIGKSTIAKFLFAKLFIQYDNVCFVDSSKEYSLDKLFSALLKEEVSTSTVVGSTFDMRRLSNKKVLIVLDGMCNVDNQGRYRLDLLEYLCKEFGDLHHESRLIITTRDKQLLVGKVECIHKVKKLKSPESLELFCLEAFKRKHPHKGYESLSESAVKYADGVPLALKVLGSYLHTKNINFWKCTLEKLSEYPNEKIQNVLKESYTGLDDLEKNIFLDIAFFFKEKKKDHVIRILDACDFAATSGIEVLEDKALITVSNSNIIQMHDLMQKMGLEIVREECKGDPGQRTRLKDKEAREVIEKNKIYFCMLTHSKKMKNLRFLKFNNTLGQRSSSTYLDLPATLEPFSDKLRYLEWIGYPFESLPSCFCAKLLAEIHMPHSKLKRLWQGMQELDNLEGI…
HK_NBARC_NBARC.Chr07.2	Chr07	TGFam.ISGAP	3055823	3060560	ATGCCATATTCTTATTCGTTCCGAGTAGTTTCTCATACAATTATCAAACATGTACTTGTTTGTCTCTTGCTGGCAATAGCAAAGATAGACAATAATAATTCTTCAAATCCAGTGACATGTTTTACTTGTCGTCCCAATGATACCCCTCAGATAAAGTACGATGTCTTTGTTAGCTTTAGCGGCGCTGACATACGACAAGATTTCCTTAGCCATTTGGTTGAGGGTTTTTATCGAAGGCAAATTCATGCGTTTGTAGATTACAAGATTCTCAAAGGGGATCAACTATCTGAAGCACTTCTTGATGCAATTGAAGGATCATTAATTTCATTGATTATATTTTCAGAAAACTATGCTTCTTCGCATTGGTGTTTGTTTGAACTTGTGAAAATTGTTGAGTGT…	MPYSYSFRVVSHTIIKHVLVCLLLAIAKIDNNNSSNPVTCFTCRPNDTPQIKYDVFVSFSGADIRQDFLSHLVEGFYRRQIHAFVDYKILKGDQLSEALLDAIEGSLISLIIFSENYASSHWCLFELVKIVECRKKDGQILLPIFYKVDPSNVRYQKGTYGDAFAKHEVRHNLTTMQTWRSALNESANLSGFHSSTFRDEAELVKEIVKCVSLRLNHVHQVNSKGLVGVGKRIAHVESLLQLEATDVRVIGIWGMGGIGKTTIAQEVYNKLCFEYEGCCFLANIREESGRHGIISLKKKLFSTLLGEEDLKIDTPNGLPQYVERRLRRIKVLIILDDVNDSEQLEILAGTRDWFGLGSRIIITTRDKQVLAKESANIYEVETLNFDESLRLFNLNAFKE…
HK_NBARC_NBARC.Chr07.3	Chr07	TGFam.ISGAP	5572494	5584739	ATGGACGCTGTGTCATCCGCACTACTAGAGCCAGTAACTAATTCTTTGTTGGATCTGCTTAAAAAGCAACTGGATTACATCCATTACAGTCGAAACTTTGATGAACTACGCGAGTGTGTAAAGCAGCTTAATCTTGTAAAGGAGAAAGTAGATCATCAATGTGAGGAAGCTTTCAAAAATGGACACGAAATTGAAGGTAAGGCTAGAGAATGGTTAGGGAAAGTGGGTAAATTTGAGACAGAAGTGGAGAAGTATTGGAACGATGATGGCCACAAAAAGACACGGTTTTCCAACTATTTATTTCTTTACTTTTGGCATAGACTAGGCAGACTAGCAAAGAAGATGGCAGTTGAGGGTAAAAAGATAACCGATGATTGCCCCAAGTCTGATGAAATTGCC…	MDAVSSALLEPVTNSLLDLLKKQLDYIHYSRNFDELRECVKQLNLVKEKVDHQCEEAFKNGHEIEGKAREWLGKVGKFETEVEKYWNDDGHKKTRFSNYLFLYFWHRLGRLAKKMAVEGKKITDDCPKSDEIAHRVYVTSNDAILSNNDLMDFGSRKSIMEQIMATLVEDPTVKMIGVYGRSGVGKSTLIKAIAKIARDKKLFNVVAFSEITDNPNLKQVQEDIAYPLGLKLEGEGENVRADHLRRRLKKEKENTLIILDDLWDRLDLNRLGIPLDGDVDDKQGPKGPTKEKSLGDYKGCKILLTSRKQNVLTDKMEVKLTFCVEELDEKDALKLFRKEAGIHGEMSKSKQEIVKKYCSGLPMAIITVGRALRDKSDSEWEKLKNQDLVGDQNPMEISV…
HK_NBARC_NBARC.Chr07.4	Chr07	TGFam.AUG	5605552	5615910	ATGGAGACAGCTGTGTCGTCCGCACTACTTAGAAAGCCAGTGGATTACATCCGTTACAGGCGAAACTTTGATGAAGTAGACGAGTGTGTTAATTTCCTTACTTTAGCAAGTCTGCTGAAATTGCCTATTTTGTCTAATACTGACCTTATGGATTTTTTGGTTAATTTTGCGGTGGACCCCATTATTCGGCAGTTGGCCTACATCCTCCGTTGCGGTCAAAACGTTGATGAATTATTGACTAGTTTTAAGAGTCTTGAACGTGAAAAAGAGTCCATAGATCGTCGATGTGACCAAGCTCAGAATAATTTACAAAACATTGAAGCCAAAGTCAAAGAATGGTCAAGGAAAGTAGATGAGTTCAAGACTGAACTAGAGAAGTTTAGGAACGATGAAGGCCAC…	METAVSSALLRKPVDYIRYRRNFDEVDECVNFLTLASLLKLPILSNTDLMDFLVNFAVDPIIRQLAYILRCGQNVDELLTSFKSLEREKESIDRRCDQAQNNLQNIEAKVKEWSRKVDEFKTELEKFRNDEGHTKTGLSNVLFLFPYFWNRHRLGRQAKKMAEIVKNLIDESAKFNEVSYTDNLTSNDFTLSNAGYMQFASRDSTVEKIIAKLEDSSVRMIGLHGSGGMGKTTLIKAIAKKAMDKKLFNVVAVSEITANPNPQKIQEDIASALRLRLEGEGENARAHRLMTRLKQEKENTLLILDDLWDRLDLNKLGIPLDGDVDDNDLNTQTSNAKPDPKEATKEKSLGDYKGCKILLTSRYKNVLTDKMEVKSTFCVEELDGDDALRLFRKEARIQG…
HK_NBARC_NBARC.Chr07.5	Chr07	TGFam.ISGAP	5650107	5666960	ATGGAGTCTGTGGTGTCCCCGATAGTGGAACGAACGTTTAATTTTGTGGTGGACCCCATTATTCGGCAGTTGGCCTACATCCTCCGTTGCAGTCAAAACGTTAATGAACTCTTGACTAGTTTTAAGAGTCTTGAACTTGAAAAAGAGTCCATAGATCGTCGATGTGACCAAGCTCAGAATAATTTACAAAACATTGAAGCCAAAGTCAAAGAATGGTCAAGGAAAGTAGATGAGTTCAAGACTGAACTAGAGAAGTTTAGGAACGATGAAGGCCACACAAAGACAGGGTTGTCCAATGTTTTATTTTTATTTCCTTACTTTTGGAATAGGCATAGACTTGGCAGACAAGCTAAGAAGATGGCAGAGAGAGTCAAGAATCTAATAGATGAGTCGGCCAAG…	MESVVSPIVERTFNFVVDPIIRQLAYILRCSQNVNELLTSFKSLELEKESIDRRCDQAQNNLQNIEAKVKEWSRKVDEFKTELEKFRNDEGHTKTGLSNVLFLFPYFWNRHRLGRQAKKMAERVKNLIDESAKFNDVSYTDNLTSNDFTLSNPGYMGFASRHSTVEKIIAKLEDSSVRMIGLHGSGGMGKTTLIKAIAKKAMDKKLFNVVAVSEITANPNPQKIQEDIASALRLRLEGEGENARAHRLMMRLKQEKESTLIILDDLWDRLDLNKLGIPLGGDVDDNDLNTQTSNARQDPKEETTEKSLGDYKGCKILLTSRDKNVLTDKMEVKSTFCVEELDDDDALRLFRKEARIQGEMSQWKQEIVKKYCAGLPMAIVTVGRALRDKSDSEWEKLKN…
HK_NBARC_NBARC.Chr07.6	Chr07	TGFam.ISGAP	5769636	5779894	ATGAATTATTTGAACAAAGTAGGGGAAAAAGCATTTGGTTGCGTGTTGGACCTGGGTATTCGGCATGTGGCTTACATCTTCAGTTACGGGAAGAAAGTTGATGAACTAAACAATAGTATTAAGGATCTTGGGCATGCAAAAGAGAGGGTAGATCATCTACGTGATGAAGCTAAGAAGAATCTACACAACATTGAAGGTCAGGTTACAGAATGGTTTCGGAAAGTAGAAGAATGTAAGACTGAAGTGGAGGAGTTTGGGAACGATGAAGGCCACAGAAAGACACGGTTGCTCCATGATTTATTTCCTTACTTGTGGAATAGATACAGGCTAGGCAAACAAGCAGTGGAGATGACAGAGGATGTCAAGAACTTAATAGATGAGTGCTCCAAGTTTAAAGAA…	MNYLNKVGEKAFGCVLDLGIRHVAYIFSYGKKVDELNNSIKDLGHAKERVDHLRDEAKKNLHNIEGQVTEWFRKVEECKTEVEEFGNDEGHRKTRLLHDLFPYLWNRYRLGKQAVEMTEDVKNLIDECSKFKEVAYRENITSNDVTLSNAGYVEFGSRKSILEGVMAQLEDSTVRMIGLHGPGGVGKSTLIKDIAKKSLDKKLFDVVVKLEITANPNLQKIQEEIAYVLGLRLEGEGENVRADCLRRRLKQEKESILVILDDLWDRLDLNKLGVPLDGDVDHNDLSKKTLDGDVDHNDLSKKTSKAKMGPKEANKEKSLGDCKGCKILLTSRDKNVLTDKMEVKSTFCVEELDDDDALRLFQKEARIQGEMSKWKQEIVKKYCAGLPMAIVTVGRALRD…
HK_NBARC_NBARC.Chr07.7	Chr07	TGFam.AUG	5799433	5803044	ATGGAGTCTGTGTTGTCCCCGATAGTGGAACGAACCTTTAATTTTGCGGTGGACCCCATTATTCGGCAGTTGGCCTACATCCTCCGTTGCAGGCAAAATGTTGATGAACTCTTGACTAGTTTTGAGAGTCTTGAACTTGAAAAAGAGTCCATAGATCGTCGATGTGACCAAGCTCAGAATAATTTACAAAACATTGAAGCCAAAGTCAAAGAATGGTCAAGGAAAGTAGATGAGTTCAAGACTGAACTAGAGAAGTTTAGGAACGATGAAGGCCACAGAAAGACAGGGTTGTCCAATGTTTTATTTTTATTTCCTTACTTTTGGAATAGGCATAGACTTGGCAGACAAGCTAAGAAGATGGCTGAGATTGTCAAGAATCTAATAGATGAGTCGGCCAAG…	MESVLSPIVERTFNFAVDPIIRQLAYILRCRQNVDELLTSFESLELEKESIDRRCDQAQNNLQNIEAKVKEWSRKVDEFKTELEKFRNDEGHRKTGLSNVLFLFPYFWNRHRLGRQAKKMAEIVKNLIDESAKFNDVSYTDNLTSNDFTLSNPGYMGFASRHSTVEKIIAKLEDSSVRMIGLHGSGGMGKTTLIKAIAKKAMEKKLFNVVAISEITANPNPQKIQEDIASALRLRLEGEGENSRAHRLMTRLKQEKENTLIILDDLWDRLDLNKLGIPLDGDVDDNDLNTKTSNAKQGPKEATKEKSLGDYMGCKILLTSRDKNVLTDKMEVKSTFYVEELDDDDSLRLFRKEARIQGEMSEWKQEIVKKYCAGLPMAIVTVGRALREKSDSEWEKLKN…
HK_NBARC_NBARC.Chr07.8	Chr07	TGFam.ISGAP	5834283	5847567	ATGGACGCTGTGTCATCCGCACTACTAGAGCCAGTAACTAATTCTGTGTTGGATCTGATTAAAAAGCAAGTGGATTACATCCGTTATAGGCAAAACATTGATGAACTAGACGAGTGTGTTAAGCAGCTTAAACATAAAAAGGAGATAGTAGATCATAAATGTGAGGAAGCTGTCAAAAATGGACACGAAATTGAAGGTAAGGTTAGAGAATGGTTAGGGAAAGTGGGTAAATTTGAGACAGAAGTGGAGAAGTATCGGAAGGATGATGGCCACAAAAAGACACGGTTTTCCAATTGTTTATTTCTTTACTTTTGGCATAGACTAGGCAGACTAGCAAAGAAGATGGCAGTTGAGGGTAAAAAGATAACCGATGATTGCCCCAATTCTGATGAAATTGCC…	MDAVSSALLEPVTNSVLDLIKKQVDYIRYRQNIDELDECVKQLKHKKEIVDHKCEEAVKNGHEIEGKVREWLGKVGKFETEVEKYRKDDGHKKTRFSNCLFLYFWHRLGRLAKKMAVEGKKITDDCPNSDEIAYRVYVTSNDAILSNNDLMDFGSRKSIMEQIMATLVEDPTVKMIGVYGRSGVGKSTLIKAIAKIARDKKLFNVVAFSEITDNPNLKQVQEDIAYPLGLKLEGEGENVRADNLRRRLKKEKENTLIILDDLWDRLDLNRLGIPLDGDVDDNDLSKKTNSDNQGPQGPTKEKSLGDYKGCKILLTSRKQNVLTDKMEVKLTFCVEELDEKDALKLFRKEAGIHGEMSKSKQEIVKKYCAGLPMAIVTVGRALRDKSDSEWEKLKNQDLV…
HK_NBARC_NBARC.Chr07.9	Chr07	TGFam.ISGAP	5867401	5882120	ATGGATTATTTGAACAAAGTAGGGGAAAAAGCATTTGGTTGCGTGTTGGACCTGGGTATTCGGCATGTGGCTTACATCTTCAGTTACGGGAAGAAAGTTGATGAACTAAACAATAGTATTAAGGATCTTGGGCATGCAAAAGAGAGGGTTGATCATCTACGTGACGAAGCTAAGAAGAATCTACACAACATTGAAGGTCAGGTTACAGAATGGTTTCGGAAAGTAGAAGAATGTAAGACTGAAGTGGAGGAGTTTGGGAACGATGAAGGCCACAGAAAGACACGGTTGCTCCATGATTTATTTCCTTACTTGTGGAATAGATACAGGCTAGGCAAACAAGCAGTGGAGATGACGGAGGATGTCAAGAACTTAATAGATGAGTGCTCCAAGTTTAAGGAA…	MDYLNKVGEKAFGCVLDLGIRHVAYIFSYGKKVDELNNSIKDLGHAKERVDHLRDEAKKNLHNIEGQVTEWFRKVEECKTEVEEFGNDEGHRKTRLLHDLFPYLWNRYRLGKQAVEMTEDVKNLIDECSKFKEVAYRENITSNDVTLSNAGYVEFGSRKSIMEGVMAQLEDSTVRMIGLHGPGGVGKSTLIKDIAKKSLDKKLFDVVVKLEITANPNLQKIQEEIAYVLGLRLEGKSENVRADCLRRRLKQEKESILVILDDLWDRLDLNKLGVPLDGDVDDNDLNTKTSNAKMGPKEVNKEKSLGDCKGCKILLTSRDKNVLTDKMEVKSTFCVEELDDDDALRLFQKEARIQGEMSKWKQEIVKKYCAGLPMAIVTVGRALRDKNDLEWEKLKNQDL…
HK_NBARC_NBARC.Chr07.10	Chr07	TGFam.ISGAP	5916981	5930350	ATGGAGTCTGTGTTGTCCCCTATAGTGGAACGAACCTTTAATTTTGTGGTGGACCCCATTATTCGGCAGTTGGCCTACATCCTCCACTACGGTCAAAACGTTGATGAACTACGGACTAGTGTTGAGAGTAAGCTTGAAGTTGTAAAAGAGTCCATAGATCGTCGATGTGACCAAGCTCGGAATAATTTAGAAAACATTGAACCCAAAGTCAAAGTATGGTCAAGGAAAGTAGATGAGTTCAAGACTGAACTAGAGAAGTTTACAAACGATGAAGGCCACAGAAAGACAGGGTTGTCCAATGTTTTATTTTTATTTCCTTACTTTTGGAATAGGCATAGACTTGGCAGACAAGCTAAGAAGATGGCAGAGAGTGTTAAGAATCTAATAGATGAGTCGGAC…	MESVLSPIVERTFNFVVDPIIRQLAYILHYGQNVDELRTSVESKLEVVKESIDRRCDQARNNLENIEPKVKVWSRKVDEFKTELEKFTNDEGHRKTGLSNVLFLFPYFWNRHRLGRQAKKMAESVKNLIDESDKFNDVSYTDNVTSNDFALSNPGYMRFASRDSTVEKIIAKLEDSSVRMIGLYGGGGMGKTTLIKAIAKKAMDKKLFNVVAISEITANPDPQKIQEDIARVLGLRLEGEGENARAPRLMTRLKQEKENTLIILDDLWDRLDLNKLGIPLDGDVDDNDLNTKTSNAKQGPKEATKEKSLGDYKGCKILLTSRDKNVLTDKMEVKSTFCVEELDDDDALRLFRKEARIQGEMSEWKQEIVKKYCAGLPMAIVTVGRALRDKSDSEWEKLK…
HK_NBARC_NBARC.Chr07.11	Chr07	TGFam.AUG	5955612	5956862	ATGGAGGCTGTGTCATCCGCACTACTAGAGCCAGTAACTAATTCTGTGTTGGATCTGCTTAAAAAGCAAGTGGATTACATCCGTTACAGGCGAAACTTTGATGAACTAGACGAGTGTGTTAAGCAACTTAAACTTGAAAAGGCGAGAGTAGATCATCAATGTGACGAAGCTGTCAAAAATGGACACAAAATTGAAGGTAAGGCTAGAGAATGGTTAGGGAAAGTGGGTAAATTTGAGACAGAAGTGGAGAAGTATTGGAACGATGATGGCCACAAAAAGACACGGTTTTCCAATTGTTTATTTCCTTACTTTAGGCATAGACTAGGCAGACTAGCAAAGAAGATGGCAGTTGAGGGTAAAAAGATAACCGACGATTGCCCCAAGTCTGCTGAAATTGCC…	MEAVSSALLEPVTNSVLDLLKKQVDYIRYRRNFDELDECVKQLKLEKARVDHQCDEAVKNGHKIEGKAREWLGKVGKFETEVEKYWNDDGHKKTRFSNCLFPYFRHRLGRLAKKMAVEGKKITDDCPKSAEIAYRVNVTSNDAILSNTDLMDFGSRKSIMEQIMATLEDPTVKMIGVHGPGGVGKSTLVKAIAEIARDKKLFNVVAFSEITVNPNLKKVQEDIAYVLGLRLEGEGENVRADHLRRRLKKEKENTLIILDDLWDRLDLNRMGIPLDGDVDDNDKQGLKGPTKEKSLGDYKGCKILLTSRNKNVLTDKMEVKSTFCVEELDEKDALKLFRKEARIQGEMSQWKQEIVKKYCAGLPMAIVTVGRALRDKSDSEWEKLKKQDLVGIQNSMEIS…
HK_NBARC_NBARC.Chr07.12	Chr07	TGFam.AUG	5956899	5978576	ATGGGTCATCAACCCCTAATTATGGACTTGGTGAAGTATTGCTTTGGTTTGGGAATACTTGAAGGGGTCTACTCGCTTGGGGAAGCTCGGGGCAGAATATCTACATCAATCCAAAAGTTGAAAAACTCAGGTTTAGTGTTGGATGGAAGTTCTAGTATTCATTTCAATATGCATGATCTGGTTCGAGATGCTGCTTTATCTATAGCACAGGAGCAAAATGTATTTACTTTGAGAAATGGGAAACTTGATGATTGGCCTGAACTCGAGAAGTGCACTTCTATTTCTATATGCAACAGTGATATCATTGATGAGCTTCCAGAAGAAATAAATTGTCCTCAACTTAAATTTTTCCAAATTGACAGTGATGATTCATCTTTAAAAATACCTAACAGTTTCTTT…	MGHQPLIMDLVKYCFGLGILEGVYSLGEARGRISTSIQKLKNSGLVLDGSSSIHFNMHDLVRDAALSIAQEQNVFTLRNGKLDDWPELEKCTSISICNSDIIDELPEEINCPQLKFFQIDSDDSSLKIPNSFFKGMKKLKVLMLTGIQLSSLPSSIESLSDLRLLSLERCTLDDNLSIIGKLKKLRILSFSGSRIENLPAELKDLDKLQLLDISNCSVVKRIPPKLISRLTSLEELYVRKCFTEVSEEGERNQSQISFMSELKHLHQLQVVDLSIPCAEVFPKELYFDNLSDYKIEIGNFKTLLAGDFRMPNKYEKFKSLALELKDDTDNIHSQKGIKLLFKRVENLLLGELNGVQDVINELNLDGFPHLKHLSIINNPSIKYIINSKDLFYPQDVFPK…
HK_NBARC_NBARC.Chr07.13	Chr07	TGFam.ISGAP	6028289	6041234	ATGGAGTCTGTGTTGTCCCCGATAGTGGAACGAACGTTTAATTTTGCGGTGGACCCCATTATTCGGCAGTTGGCCTACATCCTCCGTTGCAGGCAAAATGTTGATGAACTCTTGACTAGTTTTGAGAGTCTTGAACTTGAAAAAGAGTCCATAGATCGTCGATGTGACCAAGCTCAGAATAATTTACAAAACATTGAAGCCAAAGTCAAAGAATGGTCAAGGAAAGTAGATGAGTTGAAGACTGAACTAGAGAAGTTTAGGAACGATGAAGGCCACACAAAGACAGGGTTGTCCAATGTTTTATTTTTATTTCCTTACTTTTGGAATAGGCATAGACTTGGCAGACAAGCTAAGAAGATGGCAGAGATTGTCAAGAATCTAATAGATGAGTCGGCCAAG…	MESVLSPIVERTFNFAVDPIIRQLAYILRCRQNVDELLTSFESLELEKESIDRRCDQAQNNLQNIEAKVKEWSRKVDELKTELEKFRNDEGHTKTGLSNVLFLFPYFWNRHRLGRQAKKMAEIVKNLIDESAKFNDVSYTDNLTSNDFTLSNPGYMGFASRHSTVEKIIAKLEDSSVRMIGLHGSGGMGKTTLIKAIAKKAMEKKLFNVVAVSEITANPNPQKIQEDIASALRLRLEGEGENSRAHRLMTRLKQEKENTLIILDDLWDRLDLNKLGIPLDGDVDDNDLNTKTSNAKQGPKEATKEKSLGDYMGCKILLTSRDKNVLTDKMEVKSTFYVEELDDDDALRLFRKEARIQGEMSEWKQEIVKKYCAGLPMAIVTVGRALREKSDSEWEKLKN…
HK_NBARC_NBARC.Chr07.14	Chr07	TGFam.ISGAP	6063723	6067060	ATGGAGTCTGTGTTGTCCCCTATAGTGGAACAAACCTTTAAATTTGTGGTGGACCCCATTATTCGGCAGTTGGCCTACATCCTCCGTTGCAGTCAAAACGTTGATGAACTCTTGACTAGTTTTAAGAGTCTTGAACTTGAAAAAGAGTCCATAGATCGTCGATGTGACCAGGCTGAGAATAATTTACAAAACATTGAAGCCAAAGTCAAAGAATGGTCAAGGAAAGTAGATGAGTTCAAGACTGAACTAGAGAAGTTTAGGAACGATGAAGGCCACACAAAGACAGGGTTGTCCAATGTTTTATTTTTATTTCCTTACTTTTGGAATAGGCATAGACTTGGCAGACAAGCTAAGAAGATGGCTGAGATTGTCAAGAATCTAATAGATGAGTCGGCCAAG…	MESVLSPIVEQTFKFVVDPIIRQLAYILRCSQNVDELLTSFKSLELEKESIDRRCDQAENNLQNIEAKVKEWSRKVDEFKTELEKFRNDEGHTKTGLSNVLFLFPYFWNRHRLGRQAKKMAEIVKNLIDESAKFNDVSYTDNLTSNDFTLSNPGYMRFASRDSTVEKIIAKLEDSSVRMIGLHGGGGMGKTTLIKAIAKKAMGKKLFNVVAVSEITANPNPQKIQEDIASALRLRLEGEGENARAHRLMTRLKQEKENTLIILDDLWDRLDLNKLGIPLDGDVDDNDLNTQTSNAKQDPKEATKEKVPKEATKEKVPKEATKEKVPKEATKEKVPKEATKEKSLGDYKGCKILLTSRDKNVLTDKMEVKSTFCVEELDNDDAQRLFRKEARIQGEMSQW…
HK_NBARC_NBARC.Chr07.15	Chr07	TGFam.ISGAP	6281991	6286215	ATGTTCACACTTGAGTGGTCAATTGGTCAATCTATCATTTCTATATATCTACTTCATACACACACACACACAAGAAAAGAAAAACTTGCTTTGCTGTGTTACCAGAATCAGCATCACTGCAAGGATAATTCAATGGGATCTTCTTCCACCCTAACCTCAGGAAGGTTATGGTCCAACCATGTTTTCTTGAGTTTCAGGGGTGATGACACACGCAAAGGTTTCACTCACAATCTTTTTGCTTCACTAGAGAGAAGGGGGATCAAAGCATATAGGGATGATCATGATCTTGAGAGGGGGAAAGTGATATCAGTGGAACTCATCGAAGCCATTGAAGAGTCCATGTTTGCACTCATCATTCTCTCATCAAACTATGCCTCCTCAACATGGTGTTTGGATGAG…	MFTLEWSIGQSIISIYLLHTHTHTRKEKLALLCYQNQHHCKDNSMGSSSTLTSGRLWSNHVFLSFRGDDTRKGFTHNLFASLERRGIKAYRDDHDLERGKVISVELIEAIEESMFALIILSSNYASSTWCLDELQKILECKKEVFPIFLGVDPSDVRHQRGSFAKAFRDHEEKFREEKKKVETWRHALREVASYSGWDSKDKHEAALIETIVGHIQKKVIPGLPCCTDNLVGIDSRMKEMYSLMGIRLKDVRLIGIWGRGGIGKTTIARKVYEAIKGDFDVSCFLENIREVSKTNGLVHIQKELSNLGVSCFLEKCKTNGLVPIVEEVFRDQLRIVDFDNLHDGKMIIANSLSNKKVLLVLDDVSELSQLENLAGKQEWFGPGSRVIITTRDKHLLKTH…
HK_NBARC_NBARC.Chr07.16	Chr07	TGFam.ISGAP	7233137	7248286	ATGGGTTCTCTAATTGTTGTGTGTCATCAGTTCCTGACGTCACCTCGTTTAAAGGCATGGCTAAAGGATCAATGGATTCATCTCAAGTCATACGAGGCAAGAGTTCGTGAACTAGAATGTGTTGTTCAGAAGCTCAAGAAAAAGAGAGATGTAATTCAACATACAATTGACGAGGAAGAACATCGACGTGGGAGAGAAATTCATGTTGAAGTTGAAGAGTGGAAAGACAGGGTGGATAAGCTTTTTTTCAAATACGAGGATTTCAAGAATGACAGATACCGTGAACTTGCAGAGTTTAACTTGTTACAGAGTGGTTACCTTCCCAAGCCAGGGATAAGGTATGGTCGGAGCAGAGAAGCATATGCCATTATAAGGGAGGCCAATGGGTTGTTGCAAACG…	MGSLIVVCHQFLTSPRLKAWLKDQWIHLKSYEARVRELECVVQKLKKKRDVIQHTIDEEEHRRGREIHVEVEEWKDRVDKLFFKYEDFKNDRYRELAEFNLLQSGYLPKPGIRYGRSREAYAIIREANGLLQTAKFDTLSYWPGPPSMAAFFSNVGYESYPSREETMRKIIEELEDPSVRMIGLHGLSGVGKTTLVKEVVKKALKDKMFDVVTMASLTKNPDIRKIQGQIADTLGVTLDEESDIARAARIQKILKNDKKNTLVILDDLWDKMDLNMLGIPYEIDNGSSQRNVTEGKSFGTDGFKNSKEGKALNDLSATRVKKEETFSQYKGCKILMISESKQALLRQMEGKANCILSLEVLKEKEAHMLFKKKAGIGDKNSEFENLAAQIANKCNGLPM…
HK_NBARC_NBARC.Chr07.17	Chr07	TGFam.ISGAP	7261761	7272429	ATGCAGTTTGTTGGAATTTTTGTTCAAGTGTTGCCACATCTAAAATCGGTGTGTCTACATCTAAAGTCGGGGTTGGGATATCTAAAGCTGCTACCATATGAACTTTGGCGTTATGAAAGCATAGTTAAAGAATTAGACAGAGGTTTTAATAATCTGCAGAGAGAGAGAAAAAGGATTGGACATAAAGTAAAAGAGGAAGAAAATCGATATGGGAGAGCTATTGACGATGATGTTATTAAATGGTTACAAGAGGCTGATAAGATCATTTCTGAGTATGACGATTTCAGGCTAGATGAAGACAGTCCATATGCTGTGTTTTGCGATGGTTACCTTCCTAAACCATCGATAAGGTTTCGTCTAAGCAGAATAGCAGTTGATCTTGCAAGGAGAGGTAATGTA…	MQFVGIFVQVLPHLKSVCLHLKSGLGYLKLLPYELWRYESIVKELDRGFNNLQRERKRIGHKVKEEENRYGRAIDDDVIKWLQEADKIISEYDDFRLDEDSPYAVFCDGYLPKPSIRFRLSRIAVDLARRGNVLLQSANPDWLGRSSTDADFQSFASRNQTKKRIVDALAESNVGVIGVYGWSGVGKTSLIKEVAKEVKGKMFDVVIMVNVSFPEIRNIQGQIADRLGMILEEESESGRAARIRERLKNPKEKTLIILDDMEVKLDFGMLGIPFDNTDGSQMNNKKKNPLAHHKYAMKTEEFEASSLMKIEEPIARYTGCKILMISDSEQLLISQMGGKGIQTFSVEALTDKEAKKMFMTMAEIIPLMEKKAETMFKTMAEIIALREMEAETMSKIMTE…
HK_NBARC_NBARC.Chr07.18	Chr07	TGFam.ISGAP	14639466	14645989	ATGGCTTCTACTTGTTCTTATGTAGTTGGTTGTGCTTCTTCTTCCTCTCTCTCTGTTACCAAAAAATATGATGCTTTCATCACCTTTAGAGGAGATGATACTCGCAGCGACTTCGCAAGCCATCTTCATGCTGCTCTGCGCAGAAACAACGTCGATACATACATAGACTACAGGATCGAGAAAGGAGCTAAGATTTGGCTAGAAATCGAGAGAGCCATCAAAGACTCCACTCTCTTCTTGGTTATCTTCTCCGAGAACTACGCATCTTCTAGCTGGTGCTTGAATGAACTCCTCCAACTAATGCAATGCAAGAAACAAGAAGAAAACGTTCATGTTATTCCCGTGTTCTACAAAATAGACCCGTCTCAGGTACGCAAACAGAGCGAGAACTATCACGTG…	MASTCSYVVGCASSSSLSVTKKYDAFITFRGDDTRSDFASHLHAALRRNNVDTYIDYRIEKGAKIWLEIERAIKDSTLFLVIFSENYASSSWCLNELLQLMQCKKQEENVHVIPVFYKIDPSQVRKQSENYHVAFAKHKKDGKVSEEKMQKWKDALSEAANLSGFHSNTYRTEPDLIEDIIKVVLQKLDHKYPNDFRGPFISNENYTNIESFLNINSKEVRIIGIWGMGGIGKTTLAAAIFHKVSSHYEGTCFLENVAEESKRHDLNYVCNKLLSQLLREDLHIDTLKVIPSIVTRKLKRKKVFIVLDDVNTSELLEKLVGVGREWLGSGSRIIVTTRDKHVLIREVVDKIHEVKKMNFQNSLELFSLNAFGKTYPEKGYEELSKRAMDYAKGIPLALK…
HK_NBARC_NBARC.Chr08.1	Chr08	TGFam.ISGAP	9201624	9202184	ATGCCCCCTGAATCCACAACCATAATTTTGAATGATATAATGACGGCTTTGAGACAACCAAATATTGGCATACTTGGGATGTATGGATCGAGTAATGCGAACACGGAAAATGCAGTGGAGAAAGTCACCAGAAGAGTTGAGAGGGACGGATTGTTTAATGTGGTTGTGAAGACATGCGTGATGAAAAAGTCAGATTTGAAAAAAATTCAAGGAGAACTTGGGAACGCATTGGGTCTACAACTCCATCAGAAAACTCTAGTGGAAAGAGCTACCCGTTTGTGTGAGAGGATTAAGATGGAGGACAAGATCCTTATCATCCTTCATGATCTTCAAGCTCAAATCAACTTGGCCAAGATTGGAATACCCTTTGGGAATGACCACAAGGGTTGTAAAATCTTG…	MPPESTTIILNDIMTALRQPNIGILGMYGSSNANTENAVEKVTRRVERDGLFNVVVKTCVMKKSDLKKIQGELGNALGLQLHQKTLVERATRLCERIKMEDKILIILHDLQAQINLAKIGIPFGNDHKGCKILLVAKNKEVLSHKMKTQIEFAVDEEPSSSSLTRSHQVQTRGVIVWIKRWWCPVQ*
HK_NBARC_NBARC.Chr08.2	Chr08	TGFam.ISGAP	9212171	9212668	ATGCCCCCTGAATCCACATCCATAATTTTGAAAGAAATAATGACGGCTCTCACACAACCAAATATTGGTCTACTTGGACTGTATGGATCGAGTAATGCGAACAAGGAAAACGTAGTGGAGAAAGTCACCAGGAGAGTTGAGAGGGACGGGCTGTTTAATGTGGTTGTGAAGACATGCGTGATGAAAAAGCCAGATTTAAAAAGAATTCAAGGAGAACTTGGGAATGCATTGGGTCTACAACTCCATGAGAAAACTCTAAAGGAAAGAGCTACCCGTTTGTGTGAGAGGGTTAAAATGGAGGACAAGATCCTTATCATTCTTCATGATCTTCACGGTCAAATCAACTTGGCCAAGATTGGAATACCCTTTGGGAATGACCACAAGGGTTGTAAAATCTTG…	MPPESTSIILKEIMTALTQPNIGLLGLYGSSNANKENVVEKVTRRVERDGLFNVVVKTCVMKKPDLKRIQGELGNALGLQLHEKTLKERATRLCERVKMEDKILIILHDLHGQINLAKIGIPFGNDHKGCKILLVTENKEVLSHKMKTQIEFSVDEEPSSSGLIY*
HK_NBARC_NBARC.Chr08.3	Chr08	TGFam.ISGAP	9496040	9499015	ATGTCGGGGGTTGAGGTTGTCGCCCCTCTTGTTGGAGAGGTGGGAGCGCTTGGGGTTGGAGAATTACATACTACAATTGCATCTAAAATTGCATCTTCCAGAAACCTTGATGACAACTACAACATTTTGCTCAAAGACATGGAGAAGCTACTTGCAATAAAGAAGGATAAAGAGAGGGAGATTCAAAGAAACAACCACAAAGACACCACTAATGCTTACAAGCTTTGGACAAACAGGGTATCAGATGCCGCAGAAGAAGTGCAGAAGCTGAAAGTTAAATACAAAGAAAAAATGCTACCCTGGTGGCGTATTCGTCGACGTTCACGTCTGAGTGAAAATATGGTGAAGAAGAGCAACTGTGTTCGTGAACTTGTGAAGGATGAATGTTTAAGAGATTTT…	MSGVEVVAPLVGEVGALGVGELHTTIASKIASSRNLDDNYNILLKDMEKLLAIKKDKEREIQRNNHKDTTNAYKLWTNRVSDAAEEVQKLKVKYKEKMLPWWRIRRRSRLSENMVKKSNCVRELVKDECLRDFLVDKPPEPVLKELNVPRISGYPTLQDALEKTLGLLRNNKIKVIGVCGTKGVGKTTIMRNLNNNEEVAKLFEIVIFVKATTDDHMLQEKIANRLMLDIGTNKEHSDDVARRIHKELEKKKYLLILDEVEDAINLEQLGIPTGINGSKVVIATRFPRVYKLNRVQRLVKVEELTPDEAWKMFRDTVHAFNPKIDSLDIQPIAQLVCQRCSCLPLLIYNIANSFKLKESASSWSVGLEDLKPWPELQNQGLQELYSCLKFCYDELKDKK…
HK_NBARC_NBARC.Chr08.4	Chr08	TGFam.ISGAP	9510225	9517434	ATGCATAGAGGCCTTGCTTCAATCATTACTGGCATCCGGGAAATGGGTTCTCGTTTGAGCAAAGCACGTGGTTCTCTCAAAAATGAATCAGAAGGAACATCCTCGGGAAAAAATGAAGTTTCATACGAGGAGCTGTCTAGATTGATGAGGATAAGGGATTTGATGAGCCTATTGTTGACTTATCCAATGAAAATGGACGAGGGAGGTAAATTAAAATCCTGCATTAGTGCATTTCCTGAATGGAAAGCTCAGTTATTGTCCACTGATCATGATACTATTGTGATGGACAAACCATGGCGTGTACTAACTGAGAAGGCACTGGGATGTATGAAGGGATTTATGCCCACGGAAATAATAAGTAAAATAGAAAGTGGTGAGAGATCCATCTTCAACCATAAT…	MHRGLASIITGIREMGSRLSKARGSLKNESEGTSSGKNEVSYEELSRLMRIRDLMSLLLTYPMKMDEGGKLKSCISAFPEWKAQLLSTDHDTIVMDKPWRVLTEKALGCMKGFMPTEIISKIESGERSIFNHNDADAIPKAILHLTVDLAVNQLIQTLFSGDYYARYISLSSRNLAEKRSVVNKIEAAFEEKHNMFGIDKDFLSALWINSSTYKTDAEIRVQEEINNKMAAGFSETKGGEEKMNRHLVIVVDADSNKKLDLHKVRFPTGVVVVLITTELKDDDFRITSMMDLNIRTQDHLLPWELFCSYVGSSKVCSSLVIQRIAVQIVKECHGHLLAVVLVANYLKNVEDVKQWQVALDKLSSSLNPSYDYRDSDGIGISRVMVNAFVDIIWEDIDDT…
HK_NBARC_NBARC.Chr08.5	Chr08	TGFam.ISGAP	11740319	11740912	ATGGCAGGTGATGTTGCTGTTAAAGATTTCAATATAAAACCAATTGCAGAAAAAGTGGCAAAATGTTGTGCTGGTTTGCCTCTTTTGATAGTTACTGTGGCAAAGGGTTTGAGAAAAAAACATGTCGTTGCTTGGAGGGATGCCCTAATTCAACTAGAGAGACTTGATCACGAAGATTTGCGTGAGAAAGTCTTCCCCACTCTGGAGTTGAGTTTTAATTTCTTAGGAGATGATCAGAAGTCACTATTGTTATTCATTAGTTCATTTGGCCTCAGTTATATCCACATTGGAGAATTATTTTCATGTTGTTGGAGGTTGGGCTTTTATGAGCGCATGAACACTTTGGCAAAGGAAAGAAACATAGATTACAAATTAATAAATGACCTTAGGGCCTCTTCC…	MAGDVAVKDFNIKPIAEKVAKCCAGLPLLIVTVAKGLRKKHVVAWRDALIQLERLDHEDLREKVFPTLELSFNFLGDDQKSLLLFISSFGLSYIHIGELFSCCWRLGFYERMNTLAKERNIDYKLINDLRASSLLLEAEAEPEWVRMHDVVSYVAKSIASRFHPTYAVQTEVHRNQRVAHGRSASKVPLYYHSWVIL*
HK_NBARC_NBARC.Chr08.6	Chr08	TGFam.ISGAP	15441335	15452232	ATGATTGAGGTGAATGTTTTCTTTGAAGAAACTGAGATTCGGATTCGACTTCTTGAGAAGTGTTTGAAAAAGCTAAGGTTCAGATCCAACCTCTGGTTATGGACAGAGTTCTCTGGAACTATAGAGTCCTACAACAACTACGAAAACATGTCAACGGATTTTAGCCATGCAACGATTAAGAGCACTAGAACTGAGTATTCCTTCAACAACCTCGAATCAGGCTTGCAAACTTTCAGGGGCGCAGAGATTCTCTATGTTGACAGATCTAGCGCTAAACAGATTGCGTTTAGCTTACCTTGTTGGAAACCAGACCGTGCCGTGGCCCACTCTGGAACACTTAGCTCCTTCAACAACAGCGGAACCGGATCCCAGACTTTCGACGGTCTCAAGGTACCTCGT…	MIEVNVFFEETEIRIRLLEKCLKKLRFRSNLWLWTEFSGTIESYNNYENMSTDFSHATIKSTRTEYSFNNLESGLQTFRGAEILYVDRSSAKQIAFSLPCWKPDRAVAHSGTLSSFNNSGTGSQTFDGLKVPRETLPFHPRMKPPSLQRMPRPLVCFPEGKTTVAKVVYAKLCYEFESCCFLENVREQSQKHGLNYLHDKLLFELLKDEPPHNCTAEVVGSKFVLRRLANKKVLIVLNDVNGFEQLEYLAREFVCLGPGSRVIITTRDKHLLIRRVDKIHEVKELNFQDSLKLFSLVAFRDSNPQMEYIELSERAVAYTKGNPLALKVFGFTFPFQKYRRENKDHVMRLLDACGFYATIGIETLQDKALGTDAIEGIMLDMSQIRELHLSADIFKKMAK…
HK_NBARC_NBARC.Chr08.7	Chr08	TGFam.ISGAP	15626858	15631063	ATGGCTGCTTCTAATTCTGCCGCTGTTGTTGGTAATGCTTCTTCCTCTCTCTCTCTCTCTGTTACCAAAAAGTATGATGTTTTCATCAGCTTTAGAGGAGAGGACACCCGCGGTGACTTCACAAGCCATCTTCATGCCGCTCTCGGCAGAAGCAGCATCGAAACCTACATAGACTACAGAATCCAGAAAGGAGAGGAGGTTTGGGTCGAACTCGTGAAAGCCATCAAAGGCTCCACTCTCTTCTTGGTTATCTTCTCAGAAAACTACGCAAATTCTAGTTGGTGTTTGAATGAACTGGTTGAACTAATGGAATGCAGAAAACAAGAAGAAGAGGTTCATGTAATTCCAGTGTTCTACAAAATAGACCCATCGCAGGTACGCAAACAGACTGGGAGTTAT…	MAASNSAAVVGNASSSLSLSVTKKYDVFISFRGEDTRGDFTSHLHAALGRSSIETYIDYRIQKGEEVWVELVKAIKGSTLFLVIFSENYANSSWCLNELVELMECRKQEEEVHVIPVFYKIDPSQVRKQTGSYRAAVANQKWKDALYEAANLSGFHSHTYRTETDLIEDIIKVVLQKLNHKYTYDFRGLFISDENYTNIESLLKIDSMEVRVIGIWGKGGIGKTTLAAAIFHKVSFQYEGTCFLENVAEESKRHGLNYICNKLFSKLLREDINIDTNKVIPSNVPKRLRRKKVFIVLDDVNTPQLLENLVGADAEWLGAGSRVIVTTRDRHVLKSRGVEKIHEVKEMNIHNSLKLFSLNAFGKTYPTEEYEELSKRVMVYAKGIPLALKVLGSFLRSKS…
HK_NBARC_NBARC.Chr08.8	Chr08	TGFam.ISGAP	21596080	21597026	ATGGTTGAGGCAGTTGTGTCCTTTGCAGTTGAAAGGCTTCACAACCTACCGACGGAAGAGGCCAGATTGTTAACTGGGGTGAGTGACAAAGCCAAAAGCATGCAAAATGAACTGAAGAGGATGCAATGCTTCCTAAGAGATGCTGAGAGAAAGAAGGATAAAAATGATACTATAAAGAATTATATTTCAGAGGTGGGAAAACTAGCCTATGATGCAGAGGATGTGATTGAAATATATGCTATTAAGGTTGCATTAGGCATAAGTAAAAGAGACGTTTGGGAGGGAATTTTACTGAAGCTTATTTCTCCTACCAAAGAGGAAAGGGATGGGATTACGAAGATGAAAGATGATGAACTGGCAAGGAAGTTGTTTAAAGTTCAGCAAGATAAAAAATGTTTG…	MVEAVVSFAVERLHNLPTEEARLLTGVSDKAKSMQNELKRMQCFLRDAERKKDKNDTIKNYISEVGKLAYDAEDVIEIYAIKVALGISKRDVWEGILLKLISPTKEERDGITKMKDDELARKLFKVQQDKKCLIILDDIWSNEAWDILSPAFPSQNTRCKIVFTSHNKDISLHVDPEGLLHEPS*
HK_NBARC_NBARC.Chr08.9	Chr08	TGFam.AUG	22943688	22964818	ATGAACAACCCAACAAAACTTGTTAAAACTGCCCTAGAGAATGCACTAAACGCAACCCTACTACTTTCACTCTTGGACTATGTTTTATCTCTTGCAACGTCGTTTCTTGGAAAGCTTAGAGAGTCCCCCACTCCAACGCAGCTACTTGGCCTGCCTCGTCATGCTCCTTCTTCTTGCGGGCATAGTCATCGCGCTTTTCATCCTTTTAATGCCGCTGTTGTTGATCGTGACGAGCCCCATATGGATACCAACTGCCATGGTTTTGTTGCTTGTTACTACATTGTTGTTGTTTGTGTGTGGATTCATTGTTGTGGTGGTGGCTATGGTGTTACGGGCTTTTCGCTCCTTCGGGAGTCACAACCCTTTGAGTTGAGTCCGTCAAGGTTACCTCATCTTCGG…	MNNPTKLVKTALENALNATLLLSLLDYVLSLATSFLGKLRESPTPTQLLGLPRHAPSSCGHSHRAFHPFNAAVVDRDEPHMDTNCHGFVACYYIVVVCVWIHCCGGGYGVTGFSLLRESQPFELSPSRLPHLRGYVAQLAFVLMTSTNPSPNASPVAVPPALGGILSPPPSSSSPTNSSKSPSPPNSPQPNQTQTPNSPAPSSPSAPPPSPPSPPQAVPVTPPPSISLSPPPTLPPPSPPDSPPPLPPASPPSPPATTAPPPAETPPSLPNLSPPSPPDGSPPPQSPPTTIPPPSRPVSPSPPPPANVPRPPSTSTPPQKQSPPKTTPSHASPPSVSESPPKPPSSDVHPPSTLPSDTSGSSPPATLPDPPTNTTAAQGPTVSLPSLPTEKPTARPTND…
HK_NBARC_NBARC.Chr08.10	Chr08	TGFam.ISGAP	23513360	23516044	ATGGCAGATGGTGTTGTTGCCTTTCTGCTGCAGAACTTGTCACGGCTTCTTGAGGATGAACTAAAACTGTTTTCTGGCGTGGAGGACAAAATCAGTTCGCTGTGCAATGAGCTCAAGTTTATAGACATCTTCCTCAAGAGCTCTGAGGGGAAGTCCAACGACAAAGTTGTGAAAGAAGTGGTGAGCCAAATAAGAGATGTTGCCTACAAAGCTGAGGATGTGGTTGACACTTACATTGCCAACATCACCAAACACAGAACCAGAAACACACTGAGCATGTTATTCCACTTCAAAGAACGGTTCATGGTGCTGCACAAAGTCGACGCCGAGATAGAAAAAATCAAGATCTGTATTGATGAGATTTACAAGAACAAGGAGAGGTATGGCATCAGAGAAAGT…	MADGVVAFLLQNLSRLLEDELKLFSGVEDKISSLCNELKFIDIFLKSSEGKSNDKVVKEVVSQIRDVAYKAEDVVDTYIANITKHRTRNTLSMLFHFKERFMVLHKVDAEIEKIKICIDEIYKNKERYGIRESEYKSEEEEAETLRKRRRDVEEEDVVGLVHDSSVVIKQLTMESDSCRKVVSIIGMGGLGKTTLARKIYNNNQVSELFTCRAWGYVSNDYRARELLLSLLKCLLSTDEYNDLFKKRMDGGGEDISEEELKKKVAEWLKGKKYLVVLDDIWETQVWDEVKGAFPDDQRGSRILITSRDKEVAYYIGTKSPYYLPFLNKGESWELFSKKVFRGEECPSNLQPLGRSIVEICGGLPLAIVVLAGLVARKEKSEREWKRIKEVSWHLTQEKT…
HK_NBARC_NBARC.Chr08.11	Chr08	TGFam.PM	36047730	36056922	ATGACCTTAACCAACTATGGGCACAAATTAACCCCTCAACCATTTTTGGATTACGGGAGTTTCGGAATGTGTCCAAAAATTCTCCCACTAGTACTAAAAATACTTTATGATGCCACCATAGAGACAGTTGTGACCAAAATATCCCTCAACATGCATGACATTATTGGAAACCAAGATGAATTTTGTTTCCACCATGAAAATATTTCAAATTTGTCATCTGCATCAATACTTTTTTCCATCAACAAAGCATTATTCTTCATTTCTGCTGCCAGAAGGTTGGAACGAAAAAAAGTTCTGGTTGTGCTTGATGATGTGAATACTTTAGAAGAATTTAAATCTCTGGTTGGTGAACCAATTTGCTTTGGTGCTGGGAGTAGAGTGATCATAACAAGTAGAGAT…	MTLTNYGHKLTPQPFLDYGSFGMCPKILPLVLKILYDATIETVVTKISLNMHDIIGNQDEFCFHHENISNLSSASILFSINKALFFISAARRLERKKVLVVLDDVNTLEEFKSLVGEPICFGAGSRVIITSRDMHVLLSGGSVHQIHEVKEMNPQDSLKLFCLNAFNESQPKMGYEKLTEEVVKIAQGNPLALEVLGSDFHSRCIDTWECALSKIKKYPNEKILSVLRFNYDGLDELEKKTFLDIAFFFYNHDKDYVIRKLDAQGFHGASGIKVLKQKALRIVSNDNKIQMHNLIRQMGYEIVHQEYIIGRLSRLRDQEAFNVFRYNNPYKGKGNIREYIMEMSNLTLKLKSLKLELGEDLLAEVELQLGKKIKAVKSDCGGEYYDKYDGSREQCLGPF…
HK_NBARC_NBARC.Chr08.12	Chr08	TGFam.ISGAP	36558824	36574034	ATGCCATATAAGTCGCCGCCGGAAAGTGACGTCACGGCACCGACTCCGGGAGCGTTCAGGCTCCGGTGGGACGTGTTCCTGAGCTTCAGGGGCATCGACACGCGCGACACCATCACGAAGGGTCTCTACTCGTCTCTGGAGGCGCGTGGGGTTCGCGTGTTCCTGGACGACGTGGGATTGGAGCGTGGGGAAGAGATAAAGCAGGGGCTCATGGAGGCCATTGATGACTCAGCAGCGTTCATTGTCATCATATCTGAAAGCTACGCTACTTCCCATTGGTGTCTCGAGGAACTCACCAAGATTTGCGACACCGGGAGGCTCGTCTTGCCCGTTTTCTACCGGGTCGACCCGAGTCATGTCCGCGACCAAAAGGGTCCCTTCGAAGCGGGTTTTGTTGAG…	MPYKSPPESDVTAPTPGAFRLRWDVFLSFRGIDTRDTITKGLYSSLEARGVRVFLDDVGLERGEEIKQGLMEAIDDSAAFIVIISESYATSHWCLEELTKICDTGRLVLPVFYRVDPSHVRDQKGPFEAGFVEHERRFGKNEVSMWREAFNKLGGVSGWPFNDSEEDTLIRLLVQRIMKELSNTPLGAPKFAVGLDERVEKLMKVLQVQSNGVKVLGLYGMGGVGKTTLAKALFNNLLNHFEHRCFISNVREVSSKQDGLVSLRTKIIEDLFPEPGSPTIISDHVKARENRVLLVLDDVDDVKQLDALIGKREWFYDGSRVIITTRDTVLIKNHVNELYEVEELNFDEALELFSNHALRRNKPPENFLNLSKKIVSLTGRMPLALEVFGSFLFDKRRVE…
HK_NBARC_NBARC.Chr08.13	Chr08	TGFam.ISGAP	37648476	37653092	ATGACACAGCAATCATGTTCCTCTTCTTCCACATGTGAGTGGACTTATGATGTGTTCCTCAGTTTCAGAGGCGATGATACTCGAAGTGGTTTCACTGGAAGCCTTTACAAGTCTCTTTGTGACCAGGGAATCCACACCTTCATGGATGATGAGGGGCTCAGAAGAGGGGAAGAGATTAGACATGCTCTTTTCAAGGCAATTCAGCAGTCAAGAATTGCCATTGTTGTTTTCTCTGAAAACTATGCTTCCTCAACTTACTGTCTTGAAGAGCTTGTCATGATCCTTGAGTGCATAATGAAGAAGGGTCGCTTGGTTTGGCCGGTTTTTTACGGGGTGACTCCGTCTTATGTGCGACATCAGAAAGGTTCTTATGGGAAAGCATTGGACAAGCTTGGAGAA…	MTQQSCSSSSTCEWTYDVFLSFRGDDTRSGFTGSLYKSLCDQGIHTFMDDEGLRRGEEIRHALFKAIQQSRIAIVVFSENYASSTYCLEELVMILECIMKKGRLVWPVFYGVTPSYVRHQKGSYGKALDKLGERFKNDKEKLQKWKLALQEAANLSGSHFKLKHGYEHEVIQKIVEEVSRKINRSPLHVANYPIGLESRVQEVNSLLDVGSNQGVSMVGIYGIGGIGKTAIACAVYNLIADQFEGQCFLGDIREKSKHGLVELQETILSEMVGEKSIKLGSTNRGKAVLKSKLQRKKVLLILDDVDRLEQLKALAGDPSWFGHGSRIIVTTTDKHLLRVHGVERRYEAKGLDDKEALELFSWHAFKSNEVSPSYMDISKRAVLYSNGLPLALEIIGSNL…
HK_NBARC_NBARC.Chr08.14	Chr08	TGFam.AUG	37704260	37707105	ATGGCAGCAGAATTGGTTGGCGGTGCTCTTCTCTCTTCCTTCCTTCAGGTGGTATTTGATCGAATCGTTTCTCGTCAAGTTTTGGACTACTTTCCTGGAAGAAAGCTTGATGAGAAGTTGCTGAACAATTTGAGGTTGAAGCAGTTGTCCATCAATGCTGTGGTTATGATGCAGAAGAAAAGCAGATTCAAGATCTTCATTTCTTTTGATAAGGAAATTGAACCAAGGATGAAACAAGTCCTTGACAACTTAGAACTTCTCTCAAGCCTAAAGGGTGATCTAGGTTTGAAAGAGGCTATGGGAGTGGGGGTTGAATCAGGATCAGGTAGTAAAGTGTCACAGAAATTGCCATCAACATCTTTGGTGGTTGAAAATGTAATTTATGACAGAGATGCTGAC…	MAAELVGGALLSSFLQVVFDRIVSRQVLDYFPGRKLDEKLLNNLRLKQLSINAVVMMQKKSRFKIFISFDKEIEPRMKQVLDNLELLSSLKGDLGLKEAMGVGVESGSGSKVSQKLPSTSLVVENVIYDRDADKEIIFNWLTSGADNCNQLSILSIVGMDGMGKTTLAQQVYNDPRMEEAKFDIKAWVCVSDDFDVLRVTRAILDAITKSKNEGGDLETVHEKLIRKRFLLVLDAVWNEKHKKWEAVQTPLNYGAQGTITTFLLVLKCFAFCALFPKDYMFFKEGLIQLWMAENLLQFPQQNKSLKEVGEQYYDDLLSKSFFQQSSEDEALFFMHDLLNDLAKYVCGDIYFREFGIQQLGELNLRESLSIGELQNIENPSYALAADLKNKIHLVGLRLG…
HK_NBARC_NBARC.Chr08.15	Chr08	TGFam.ISGAP	37874089	37877288	ATGAATGAGCAGCAAAGGATCACTGATGTTGCTTCTTCCTCTAACTCTTCATCTATGTCATCTTCTAAACAATATGATGTTTTCCTGAGCTTTCGAGGTGAAGACACTCGAAGGAGCTTCACAAGCCATCTATATGAATCTTTGAATGAAGTGAAAGTCCAAACCTATATAGATGATCGACTTGAAAAGGGAGAAGAAATCTCACCTACACTCACCAAAGCCATCGAAAATTCTCGTGTATCTATTGTCATTTTCTCAGAGAACTATGCTTCCTCAAAGTGGTGCTTGGGTGAACTCATCAAGATTATGGAAAGCAAGAAAGAAAAAGGACAGATTGTGATTCCAGTTTTCTACAACATAGACCCATCCCATGTGAGGAAGCAGACAGGGAGCTATGAG…	MNEQQRITDVASSSNSSSMSSSKQYDVFLSFRGEDTRRSFTSHLYESLNEVKVQTYIDDRLEKGEEISPTLTKAIENSRVSIVIFSENYASSKWCLGELIKIMESKKEKGQIVIPVFYNIDPSHVRKQTGSYEQAFEKHEGEPRCNKWKTALTEAAGLAGFDSRNYRTDPELLKDIVGAVLRKLPPRYQNQRKGLIGIEDHCKQIESLLKIGSSEVKTLGIWGMGGIGKTTLATTLYDKLSHKFEDACFLANLSEQSDKPKNRSFGNFDMANLEQLDKNHSRLQDKKVLIILDDVTTSEQLDKIIPDFDCDFLGPGSRVIVTTRDKQILSRVDEIYPVGEWSFDKSLQLFCLTAFGEKQPNDGYADLSRMVVSYCKGIPLALKVLGASLRSRSKEIWEC…
HK_NBARC_NBARC.Chr08.16	Chr08	TGFam.PM	38058772	38060783	ATGTTATTGCTTGTCTCACCATTTCGATGCTCCATCTACATCAGATATCCTCCACAACACAGGGGCTACAATAACGTCACCTCTGATAACGAAACCAATATTCTCACTGATGCGTCAAAATTTAGCTTAAGTTTGGTCGTTGGAGGTGGTTTCCAACTCATCTTTTGTTATGGATTAGCATTTTTAACCTGGCTTTCCGATGTCACAACAATATGTCCAGAATACCTCATGAATATATCTTCTGACTTTGTTAAAAAATGTAAGGGTTTGCCTCTAGAAATTGTGGCTATTGGTAGTCTTTTAGATGACAAAGAAAAGACTCCATTCGAATGGGAAATAATTAGGCAAAGCCTAAGTTCGGAGATGGAGAAAAAATCCACATTTAGTTGGTATATAGCA…	MLLLVSPFRCSIYIRYPPQHRGYNNVTSDNETNILTDASKFSLSLVVGGGFQLIFCYGLAFLTWLSDVTTICPEYLMNISSDFVKKCKGLPLEIVAIGSLLDDKEKTPFEWEIIRQSLSSEMEKKSTFSWYIAKILGFTCDDFPYCLKLCFFYFGIYLEDYEVQSTRLIRQWIAKALVKDKDGKTLEDVAQQYLTKLIGRSLVQVSSFSIDGVVVFLKKFSASVFIFFFIFLSAIISTPLMSAPRLMLTPPPMPPPQPMPTPSPMPTPLPMSTAPPCPAPVQTFLPLFSGPLPMPVLHLSNLGLVRTTISFNKFLNIVPPYGIVMAAYKLQSVAFALCTTAKPGAIRRNKLWDPGITFGSHVLNPQHLEDKVFLQGPRNDREARVQQATSKKPSKDSNR…
HK_NBARC_NBARC.Chr08.17	Chr08	TGFam.ISGAP	38070180	38073020	ATGGCGGAAATGGCAGTGTCCTTCGCTCGAGACAAATTGCTTTCACTACTAAGCAATGAAGCAAAACTCCTTTGGGACTTGCACACAGAATTTGCAGAAATAAAAACTGAACTGGATTTCATTCAAGCCTTCCTCAAGGATGCAGATAGAAGGGCTGAAGAAGAAGGAGACAGCACTAATGAGGGGATCAGAACATTGGTTAAACAGTTGAGGGAAGCCTCTTTTCGCATAGAAGATGTGATTGATGAGTACTTGATCTTTGTGGAACAACAGCCTGATGCTCTTGGATGTGCAGCTTTATTCTTTGAGTGTGACATTACACACTTCATTGAATATTTGAAACGTCGCCACCATATAGCATCAGAGATTCAGCAGATTAAGTCAGTTGTTGATGGTATC…	MAEMAVSFARDKLLSLLSNEAKLLWDLHTEFAEIKTELDFIQAFLKDADRRAEEEGDSTNEGIRTLVKQLREASFRIEDVIDEYLIFVEQQPDALGCAALFFECDITHFIEYLKRRHHIASEIQQIKSVVDGIMQRGKKYNFLRQPSVEQGQSSNAGSQSIQWHDPRIASRYLDEAEVVGFEGPRDELIDWLVEGPAERTVISVVGMGGLGKTTLASRVFNNQKVVGHFDFHAWITVSQSYTVEGMMRDLLKKLCKEKRENPPQDISEMDRDSLIDEVRNYLQQKRYVVILDDVWSVELWGQIKSAMFDNKNGSRILITTRKTGVVESCKNSPFDKVHELEPLSSEKSMELFYKKAFQFDFNGCCPDHLLNISSEIVKKCKGLPLAIVAIGGLLSGKEK…
HK_NBARC_NBARC.Chr08.18	Chr08	TGFam.PM	38697235	38698441	ATGAATGAGGGGATCAGAACATTGGTGAAAGATTTGAGAGAAACCTCTTTTCGCATACAAGATGTCATTGATGAATACATTATCTATGTCAGCCTGATGCTCTTGGATGTGCAGCTTTGCTCTGAAAAACTACTCTTGCCAGCAGAGTATTTAACAATGGGAAGGCTGGAAAAGTTGATGAGAGACTTGTTGAAGAAGTTATTTGAAGATGAAGGGAAGGAGCCTCCGCAGTATATTTCTGAAATGGATCGAGATTCATTGCTTGATGCAGTGAGAAAATATTTGCAACACAAGAGGTCCGTTGTTATCTTTGATGATGTGTGGAGTGTAAAACTTTGGGCTCAAATTGAAAATGCCTTGCTTGATAATAACAATGGAAGTAGAATATTAATCACAACT…	MNEGIRTLVKDLRETSFRIQDVIDEYIIYVSLMLLDVQLCSEKLLLPAEYLTMGRLEKLMRDLLKKLFEDEGKEPPQYISEMDRDSLLDAVRKYLQHKRSVVIFDDVWSVKLWAQIENALLDNNNGSRILITTRSREVVTSCKNSPFNKVHELKPLTLKSLWNFFARRHSNVTTMNFSDFVEKCEFLDCIVPDGGTEHPSIHHMPLVTIHTLGGKARIIHHWKSSH*
HK_NBARC_NBARC.Chr08.19	Chr08	TGFam.PM	38919249	38921354	ATGTCACAGGAAGAGAGGGTAGAAGAAAGCCAGTGTTGTTCGAACTTGACATTTAACTATTCTCTAGCTAAAGATGTGATATGCATAGCCCAACAAATGAATGTGCTCAACAACAACAACAAATTCAAGCCATTTTCACACCCCATTCAACTCTCAAGCATGAATTACTTCTTTCTCAAAGACTTTTTGGCATTGGATTCTAAGAAACCAGTTTATGAAGAGTTGAAGGCAATCCAAGATCAGATCGAGAAGATTCTCATCATCTTGGATGGTGTATGGGAGAAGTTGGACTTGGAAGCTATAGGGATTCCATTAAATGAGAACGACAAGAGATATTGTATCCTCCTCACTACGTGCAACCAAGCAATTTGCACTTCAATGAACTGCCAAAGCATGATT…	MSQEERVEESQCCSNLTFNYSLAKDVICIAQQMNVLNNNNKFKPFSHPIQLSSMNYFFLKDFLALDSKKPVYEELKAIQDQIEKILIILDGVWEKLDLEAIGIPLNENDKRYCILLTTCNQAICTSMNCQSMIELSMLNEDEGWTLFKQRAQIDDDSLEDLREVAKRVFDKCKGLLVAIVTVARTLKEKTCTSWELTFLRLETSESIDVQEGLTRSINIENCSKLKTFFSATTVTSLPKLQQLVVKDCNKWEEIIFLDSDQAGQFRNLYPLSNPDCFAKPRSVQIERCNSLKTIFITTIVTSLPELLVKDCDKWMEIISLDLVEARQVGNQSASSKQICFPKLQRIQIESCKKLKTILFATIATSLPELEKIVVKNRNDWEGIVYLDSEEARKHRNLTV…
HK_NBARC_NBARC.Chr08.20	Chr08	TGFam.AUG	39390245	39400850	ATGCAGAAATTGCAAGAAATTGCAGTGTCCTTGGCTGTTGATTATTTGTTTCCACCCTTAAAGAAAGCAGTGAATTCAGTCATGGAGGTTCCAAAAGATGCTGCAGACATGAAAGACAAACTTGATGGGATTCAAGCCATGATTCATGATGTGGACAAGATGGCAGCAGCTGAAGAAGGCAACTCACGTGATGGTCTTAAAGCAAAGGTGAAGCAGCTGGTGGAAACATCTTTTTGCATGGAAGATATCGTTGATGAATACATTATCCATGAGGAAAGGCAGCTTGGTGATGATCCTGGATGTGCATCTTTACCTTGTAAGGCTGTTGATTTCGTCAAAACTACGGCCTCTCGTCTTCAATTTGCATACATGAACCAGGACGTGAAATCAGAATTTCGT…	MQKLQEIAVSLAVDYLFPPLKKAVNSVMEVPKDAADMKDKLDGIQAMIHDVDKMAAAEEGNSRDGLKAKVKQLVETSFCMEDIVDEYIIHEERQLGDDPGCASLPCKAVDFVKTTASRLQFAYMNQDVKSEFRGIKERNKSEDCSQIQSSGGPQNITFDNLRMAPMFLKEAEVVGFDSPRDTLERWLIEGREKLTVVSVVGMGGSGKTTLAKKVFDNVQTHFPRHVWITVSQSYTIEGLLLKFLEAEKGKDPSQSVYSTMDKASLIHEVRNHLSCNRYVVVFDDVWNENFWEEMKFALVDVENGSRIIITTRHREVAESCRTSSIVQVHELQPLTDDKSFELFCKTAFGSELDGHCPNNLKGISTEIVKKCEGLPLAIVATGGLLSCKSRDAREWQRFS…
HK_NBARC_NBARC.Chr08.21	Chr08	TGFam.ISGAP	39434209	39436902	ATGGAGAAATTGCAAGAAATTGCAGTGTCCTTGGCTGTTGATTATTTGCTTCCACCCATAAAGAAAGCAGTGAATTCAGTCATGGAGGTTCCAAAAGATGCTGCAGACATGAAAGACAAACTTGATGGGATTCAAGCCATGATTCATGATGTGGACAAGATGGCAGCAGCTGAAGAAGGCAACTCACGTGATGGTCTCAAAGCAAAGGTGAAGCAGCTGGTGGAAACATCTTTTTGCATGGAAGATATCGTTGATGAATACATTATCCATGAGGAAAGGCAGCTTGGTGATGATCCTGGATGTGCATCTTTACCTTGTAAGGCTATTGATTTGGTCAAAACTACGGCCTCTCGTCTTCAATTTGCATACATGAACCAGGACGTGAAATCAGAATTTCGT…	MEKLQEIAVSLAVDYLLPPIKKAVNSVMEVPKDAADMKDKLDGIQAMIHDVDKMAAAEEGNSRDGLKAKVKQLVETSFCMEDIVDEYIIHEERQLGDDPGCASLPCKAIDLVKTTASRLQFAYMNQDVKSEFRGIKERNKSEDCSQIQSSGGPQNITFDNLRMAPMFLKEAEVVGFDSPRDTLERWLKEGRENLTVVSVVGMGGSGKTTLAKKVFDKVQTHFTRHVWITVSQSYTIEGLLLKFLEAEKGKDPSQSVYSTMDKASLIHEVRNHLSCNSYVVVFDDVWNESFWEEMKFALVDVENGSRIIITTRHREVAESCRTSSIVQVHELQPLTDDKSFELFCKTAFGSELDGHCPNNLKGISTEIVKKCEGLPLAIVATGGLLSRKSRDAREWQRFC…
HK_NBARC_NBARC.Chr08.22	Chr08	TGFam.AUG	39437806	39459078	ATGCAGAAATTGCAAGAAATTGCAGTGTCCTTGGCTGTTGATTATTTGCTTCCCCCCATAAAGAAAGCAGTGAATTCAGTCATGGAGGTTCCAAAAGATGCTGCAGACATGAAAGACAAACTTGATGGGATTCAAGCCATGATTCATGATGCGGACAAGATGGCAGCAGCTGAAGAAGGCAACTCACGTGATGGTCTCAAAGCAAAGGTGAAGCAGCTGGTGGAAACATCTTTTTGCATGGAAGATCTCGTTGATGAATACATTATCCATGAGGAAAGGCAGCTTGCTGATGATCCTGGATGTGCATCTTTACCTTGTAAGGCTGTTGATTTCGTCAAAACTACGGCCTCTCTGCATGAGTTGCAACCTTTAACTGATGACAAATCTTTCGAATTGTTT…	MQKLQEIAVSLAVDYLLPPIKKAVNSVMEVPKDAADMKDKLDGIQAMIHDADKMAAAEEGNSRDGLKAKVKQLVETSFCMEDLVDEYIIHEERQLADDPGCASLPCKAVDFVKTTASLHELQPLTDDKSFELFCKTAFGSELDGHCPNNLKGISTEIVEKCEGLPLAIVATGGLLSRKRRDAREWQRFSENLSSELGKHPDLTPVTKILGLSYYDLPYHLKPCFLYFGIYPEDYEVECEGLILQWVASGFVKSDEAAQTLEEVAEKHLNELIQRSLVQVSSFSTSGEIESCRVHDVVREMIREKNQDLSVCHSASERGNLSKSGMIRRLTIASGSNNLTGSVESSNIRSLHVFSDEELSESLVKSMPTKYRLLRVLQFEGAPMYDYVPPIESLGDLSFL…
HK_NBARC_NBARC.Chr08.23	Chr08	TGFam.ISGAP	39471846	39474560	ATGCAGAAATTGCAAGAAATTGCAGTGTCCTTGGCTGTTGATTATTTGCTTCCCCCCATAAAGAAAGCAGTGAATTCAGTCATGGAGGTTCCAAAAGATGCTGCAGACATGAAAGACAAACTTGATGGGATTCAAGCCATGATTCATGATGCGGACAAGATGGCAGCAGCTGAAGAAGGCAACTCACGTGATGGTCTCAAAGCAAAGGTGAAGCAGCTGGTGGAAACATCTTTTTGCATGGAAGATATCGTTGATGAATACATTATCCATGAGGAAAGGCAGCTTGCTGATGATCCTGGATGTGCATCTTTACCTTGTAAGGCTATTGATTTCGTCAAAACTACGGCCTCTCGTCTTCAATTTGCATACATGAACCAGGACGTGATATCAGAATTTCGT…	MQKLQEIAVSLAVDYLLPPIKKAVNSVMEVPKDAADMKDKLDGIQAMIHDADKMAAAEEGNSRDGLKAKVKQLVETSFCMEDIVDEYIIHEERQLADDPGCASLPCKAIDFVKTTASRLQFAYMNQDVISEFRGIKERNKTEDCSQIQSSGGNQNITFDNLRMAPLFLKEAEVVGFDSPRDTLERWLKEGRKRLTVVSVVGMGGSGKTTLAKKVFDKVQTYFPRHVWITVSQSYTIEGLLLKFLEAEKGKDPSQSVYSTMDKASLIHGVRNHLSRNRYVVVFDDVWNENFWEEMKFALVDIENGSRIIITTRHREVAESCRTSSLVQVHELLPLTDDKSFELFCKMAFGSELDGHCPNNLKGISTEIVKKCEGLPLAIVATGGLLSRKSRDAREWQRFS…
HK_NBARC_NBARC.Chr08.24	Chr08	TGFam.ISGAP	39587251	39589581	ATGGAGAAATTGCAAGAAATTGCAGTGTCCTTGGCTGTTGATTACTTGCTTCCACCCTTAAAGAAAGCAGTGAGTTCAGTCATGGAGGTTCCAAAAGATGCTGCAGACATGAAAGACAAACTTGATAGGATTCAAGCCATGATTCATGATGTGGACAAGATGGCAGCAGCTGAAGAAGGCGACTCACGTGATGGTCTCAAAGCAAAGGTGAAGCAGCTGGCGGAAACATCTTTTTGCATGGAAGATCTCGTTGATGAATACATTATCCATGAGGAAAGGCAGCTTGCTGATGATCCTGGATGTGCAACTTTACCTTGTAAGGCTATTGATTTCATCAAAACTACGGCCTCTCGTCTTCAATTTGAATACATGAACCAGGACGTCAAATCAGAATTTCGT…	MEKLQEIAVSLAVDYLLPPLKKAVSSVMEVPKDAADMKDKLDRIQAMIHDVDKMAAAEEGDSRDGLKAKVKQLAETSFCMEDLVDEYIIHEERQLADDPGCATLPCKAIDFIKTTASRLQFEYMNQDVKSEFRGIKERNKTEDCSQIQSSGGNQNITFDNLRMAPMFLKEAEVVGFDSPRDTLERWLKEGREKLTVVSVVGMGGSGKTTLAKKVFDKVQTHFTRHVWITVSQSYTIEGLLLKFLEALLKFLEVEKGKDPSQSVYSTMDKASLIHEVRNHLSCNIYVVVFDDVWNENFWEEMKFALVDVENGSRIIITTRHREVAESCRTSSLDQVHELQPLTDDKSFELFCKMAFGSELDGHCPNNLKGISTEIVKKCEGLPLAIVATGGLLSRKSRDA…
HK_NBARC_NBARC.Chr08.25	Chr08	TGFam.ISGAP	39598460	39601165	ATGGAGAAATTGCAAGAAATTGCAGTGTCCTTGGCTGTTGATTATTTGCTTCCACCCTTAAAGAAAGCAGTGAATTCAATCATGGAGGTTCCAAAAGATGCCGCAGACATGAAAGACAAACTTGATGGGATTCAAGCCATGATTCATGATGTGGACAAGATGGCAGCAGCTGAAGAAGGCAACTCACGTGATGGTCTCAAGGCAAAGGTGAAGCAGCTGGTGGAAACATCTTTTTGCATGGAAGATATCGTTGATGAATACATTATCCATCAGGAAAGGCAGCTTGGTGATGATCCTGGATGTGCATCTTTACCTTGTAAGGCTATTGATTTCGTCAAAACTACGGCCTCTCGTCTTCAATTTGCATACATGAACCAGGACGTGAAATCAGAATTTCGT…	MEKLQEIAVSLAVDYLLPPLKKAVNSIMEVPKDAADMKDKLDGIQAMIHDVDKMAAAEEGNSRDGLKAKVKQLVETSFCMEDIVDEYIIHQERQLGDDPGCASLPCKAIDFVKTTASRLQFAYMNQDVKSEFRGIKERNKTEDCSQIQSSGGPQNITFDNLRMAPLFLKEAEVVGFDSPRDTLERWLKEGREKLTVVSVVGMGGLGKTTLAKKVFDKVQTHFTRHVWITVSQSYTIEGLLLKFLEAEKRKDPSQSVYSTMDKASLIREVRNHLSRNRYVVVFDDVWNENFWEEMKFALVDVENGSRIIITTRYREVAESCRTSSLVQVHELQPLTDDKSFELFCKTVFGSELDGHCPNNLKDISTEIVKKCEGLPLAIVATGGLLSRKSRDAREWQRFS…
HK_NBARC_NBARC.Chr08.26	Chr08	TGFam.ISGAP	39618642	39621326	ATGCAGAAATTGCAAGAAATTGCAGTGTCCTTGGCTGTTGATTATTTGCTTCCACCCTTAAAGAAAGCAGTGAATTCAGTCATGGAGGTTCCAAAAGATGCCGCAGACATGAAAGACAAACTTGATGGGATTCAAGCCATGATTCATGATGTGGACAAGATGGCAGCAGCTGAAGAAGGCAACTCACGTGATGGTATCAAGGCAAAGGTGAAGCAGCTGGTGGAAACATCTTTTTGCATGGAAGATATCGTTGATGAATACATTATCCATCAGGAAAGGCAGCTTGGTGATGATCCTGGATGTGCATCTTTACCTTGTAAGGCTATTGATTTCGTCAAAACTACGGCCTCTCGTCTTCAATTTGCATACATGAACCAGGACGTGAAATCAGAATTTCGT…	MQKLQEIAVSLAVDYLLPPLKKAVNSVMEVPKDAADMKDKLDGIQAMIHDVDKMAAAEEGNSRDGIKAKVKQLVETSFCMEDIVDEYIIHQERQLGDDPGCASLPCKAIDFVKTTASRLQFAYMNQDVKSEFRGIKERNKSEDCSQIQSSGGNQNITFDNLRMAPLFLKEAEVVGFDSPRHTLERWLKEGRKKLTVVSVVGMGGSGKTTLTKKVFDKVQTRFTRHVWITVSQSYTREGLLLKFLGAEKREDSTMDKASLVHEVRNHLSRYRYVVVFDDVWNENFWEEMKFALVDVENGSRIIITTRHREVAESCRTSSLVQVHELQPLTDDKSFELFCKTAFRSELDGHCPHNLKGISTEIVKKCGGLPLAIVATAGLLSRKSRDAREWQRFSENLSSE…
HK_NBARC_NBARC.Chr08.27	Chr08	TGFam.ISGAP	39926762	39929482	ATGGAGAAATTGCAAGAAATTGCAGTGTCCTTGGCTGTTGATTATTTGCTTCCACCCTTAAAGAAAGCAGTGAATTCAGTCATGGAGGTTCCAAAAGATGCTGCAGACATGAAAGACAAACTTGATGGGATTCAAGCCATGATTCATGATGTGGACAAGATGGCAGCAGCTGAGGAAGGCAACTCACGTGATGGTCTCAAAGCAAAGGTGAAGCAGCTGGTGGAAACATCTTTTTGCATGGAAGATCTCGTTGATGAATACATTATCCATGAGGAAAGGCAGCTTGCTGATGATCCTGGATGTGCATCTTTACATTGTAAGGCTATTGATTTCGTCAAAACTACGGCCTCTCGTCTTCAATTTGCATACATGAACCAGGACGTGAAATCAGAATTTCGT…	MEKLQEIAVSLAVDYLLPPLKKAVNSVMEVPKDAADMKDKLDGIQAMIHDVDKMAAAEEGNSRDGLKAKVKQLVETSFCMEDLVDEYIIHEERQLADDPGCASLHCKAIDFVKTTASRLQFAYMNQDVKSEFRGIKERNKSEDCYQIQSSGGPQNITFDNLRMAPMFLKEAEVVGFDSPRDTLERWLKEGREKLTVVSVVGMGGSGKTTLAKKVFDKVQTHFTRHVWITVSQSYTIEGLLLKFLEALLKFLEAEKGKDPSQSVYSTMDKASLIHEVRNHLSCNIYVVVFDDVWNENFWEEMKFALVDVENGSRIIITTRHREVAESCRTSSLVQVHELQPLTDDKSFELFCKMAFGSELDGHCPNNLKGISTEIVKKCEGLPLAIVATGGLLSRKSRDA…
HK_NBARC_NBARC.Chr08.28	Chr08	TGFam.ISGAP	40414614	40422272	ATGGCTGAAACTGCAGTGTCCCTTCTATTCGACCATTTGGTGAAGTTACTGAGTGAGGAAACAACAATCTTAAAAAATGTGCACAAGGAGGTTGAGGGCATCAAGGATCAGCTAAGCCTAATAAACTCTTACATAAGGGATGCAGAAAAGAAGCAGCAGAAAGATGCTGTCAAAGAATGGTTGAATTCATTGAGGAATGTGGCGTTTCGCATGGAGGATGTGGTTGATCACTATTTGCTCAAAGTGGCAGAGCGTGGTCAAAGAGATGGGGCTTTTGGTGTAGTTACTGAAGTCAAGGAGAAGTTCAAAACTGTAACACATCGTCATGATATTGCATCTGAGATTAAACATGTAAGAGAAACTCTAGATAGTCTCTGCAGTCTCAGAAAAGGCTTGGGA…	MAETAVSLLFDHLVKLLSEETTILKNVHKEVEGIKDQLSLINSYIRDAEKKQQKDAVKEWLNSLRNVAFRMEDVVDHYLLKVAERGQRDGAFGVVTEVKEKFKTVTHRHDIASEIKHVRETLDSLCSLRKGLGLQLSASAPNHATLRLDAYFVEESQLVGIDRKKRELTNWLTEKEGPVKVVVGPGGIGKTAIVKNVYNMQEQVSLQKKGTSYFEFCAWITMSGPQVDDHNMLIIRQIIENILEKDPGASATLQKETTAIHSLIRKVREYLKDKRYLIVFDDVHSSKFWNVIKHALTPNRSKSSKVIITTRDENVAKFIGSDDVYKVEPLSQSDALKLFCHKVFQSEKVENPELNALSQEFVEKSDGVPVAIVTFAGLLATTSKTTTKWRMVLNKLDSL…
HK_NBARC_NBARC.Chr08.29	Chr08	TGFam.PM	41630667	41633142	ATGAACCAGACAGTTTTTCAAGATTTCATCAATGATGCAGATAAAGTAGCTGAAGCAGAAGAAGATGATGGGAAGCAAGCAGCTTTTCGCATGGAAGATGTCATCGATGAATATATGATGATCTTTAGTGAGGAAAAGCAACCTGAAGATGATCCTCGATGCGCAGCTTTACTCTCATATAAGATTCAGGATGCTAAATCACTTGTTCGTGTTGAAAGAGATGGTTTCCGAAGTTATTTTCCTTCAGAAAAAAGAACAAACAATTCTAGAGGAAATCAAAATGTCACATGGCTGAAACTTCGAATGGATCCTTTCTTTATTGAGGAAGATCAGATTGTGGACCTTGACGACCCAAGATATAGGTTGAGAAAGGGAAGAAAAGAACCCAGTGTCATCTCT…	MNQTVFQDFINDADKVAEAEEDDGKQAAFRMEDVIDEYMMIFSEEKQPEDDPRCAALLSYKIQDAKSLVRVERDGFRSYFPSEKRTNNSRGNQNVTWLKLRMDPFFIEEDQIVDLDDPRYRLRKGRKEPSVISVVGILRVGKTTLSKQVFDQVHNDFECHALITMSQSYTVQELLRDITNNLCKEKTEDPPKDVSTMDQRLFTEESKKPLGRILITTRDEKVVEFCKKYSFVEYSYNGRCPEELKDTALEIVRKFKGLPLAIVAIGGLFSKKDEKLERNSELNSIPKILSLSYDDLPMNLRSCLLYFRMYLEDYEVKFDRLIRQWIAEGFVKHETGKLSLVQVSSFTIDGKVTRCRVHDLMHDMILSKVKDTWFCQYIGGHDQTMSKNPHKLHDIKVLD…
HK_NBARC_NBARC.Chr09.1	Chr09	TGFam.ISGAP	1610955	1613975	ATGGCTGAGTTTACCCTTGAAACCGTGCTTAGGAATTTGAACACACTTGTTCAAAAGGAGTTGCCACTATTTCTGGGTTTTGATAAAGACTTAGAAAGGCTTGCCACCTTGTTCACTACAATCAAGGCTGCGCTTGAAGATGCTGAAGAGAAACAATTCTCAGACAGAGCTATGAAAGATTGGCTGGGAAAGCTAAAAGATGCAGCACTCATCCTGGATGACATCATTGATGAGTGTGCCTATGAAGGATTGGCGTTGGAGAACCAGCGGGTCAAGTCTGGTCCATCAGATAAGGTACAAGGCTCTTGCTTATCCTCTTTTAATCCCAAGCGTGTTGTTTTCCGTTACAAAATTGCTACAAAAATGAAAGGGATAAATGAGAGATTAATTGAAATTGCT…	MAEFTLETVLRNLNTLVQKELPLFLGFDKDLERLATLFTTIKAALEDAEEKQFSDRAMKDWLGKLKDAALILDDIIDECAYEGLALENQRVKSGPSDKVQGSCLSSFNPKRVVFRYKIATKMKGINERLIEIAEERKKFHLTELVRERRSEVIQLRQTGSSITETQVFGREEDKNKILDFLIGDATHSEELSVYPIAGVGGLGKTTVAQLIFNHERVVNHFELRMWVCVSEYFSLKRVTKAIIEAAGHTCQDLDLESQQRRLHDLLQRKRYLLVLDDVWDDNQENWQRLKSALACGAKGASLLVTTRLLKVVAIMGTLPRHELSVLSDNDCWELFKHQAFGPNEEEHVELEDIGKEMVKKCRGMPLAAKALGGLLRFKRNKNEWLNVKENNLLELSHNE…
HK_NBARC_NBARC.Chr09.2	Chr09	TGFam.ISGAP	1619621	1634663	ATGGCTGACTTTGTCCTTGAAATTGTGCTTGAGAATTTGATCTCACTTGTTCGAAAGGAGTTGGTACTATTTCTGGGTTTTGACCAAGACTTGGAAAGGCTTTCAAGCTTGTTCGCTACAATCAAGGCTACACTTCAAGATGCTGAGGAGAAACAATTCTCAAACGCAGCCATAAAAGATTGGCTGGGAAAACTAAAATATGCAGCTCACGTTCTGGATGACTTCATTGACGAGTGTGCCTATGAAGGATTGGGGTTGGAGAACCAAGGGGTCATGTGTGGTCCTTCAGACAAGGTACAATGCTCTTGCTTATCCTCTTTGCATCCCAAGCGTGTTGTTTTCCGTTACAAAATTGTTAAGAAAATGAAAAGGATAAGTCAGAGATTAATACAAATCGCT…	MADFVLEIVLENLISLVRKELVLFLGFDQDLERLSSLFATIKATLQDAEEKQFSNAAIKDWLGKLKYAAHVLDDFIDECAYEGLGLENQGVMCGPSDKVQCSCLSSLHPKRVVFRYKIVKKMKRISQRLIQIAEERTKFHLTEMVRERRSGVLEWRQTVSLLTEPKVYGREEEKDKILDFLIGDASHFEDLSVYPITGLGGLGKTTLAQFIFNHEKVVNHFELRIWVCVSEDFSLKRMTKVIIEAASGRACEDLDLEPQQRRLQDLLQRKRYLLVLDDVWDDKQQNWQRLKPVLACGAKGASILVTTRLLQVAKIMGTLPPHELSVLSDNDCWELFKHQAFGPNEGEQIELEKIGKEIVKKCQGMPLAAKALGGLLRFKRNKNEWLNAKESNLLELSHN…
HK_NBARC_NBARC.Chr09.3	Chr09	TGFam.PM	3441624	3444544	ATGGCCGATAATGACAAGACAACCCTTGCAGAAGAAGTATTTAAGAAACTACAATCTGAATATGATGAAAAATCAAGTAAACATGGAATAGATTCTTTGCAGAAAGAAATTTTTTCTAGACTTTTAGAAAATGTTGTGAAAATAGACAATCCAAATGCATTTCCTATTGATGTTGATAGAAGAATTGGTAGTATGAAAGTTCTTATTGTTCTCGATGATGTTAATGATTCAGATCACCTACAAAAATTACTGAGAACTCCTTATAAGTTTGGATTAGGTAGTAGAATAATTGTAACAACCAGATACGTGCAAGTGCTTAACGCTAACAAAGCTAACGAGACAAACCAGCTTGGAGAGTTCAGTTTAGATAAAGCCCTTGAACTTTTCAATTTGAATGCC…	MADNDKTTLAEEVFKKLQSEYDEKSSKHGIDSLQKEIFSRLLENVVKIDNPNAFPIDVDRRIGSMKVLIVLDDVNDSDHLQKLLRTPYKFGLGSRIIVTTRYVQVLNANKANETNQLGEFSLDKALELFNLNAFKQSDHQWEYDELSKRVVNYAKGNPLVLKVLAQLLCGKNKEEWEGMLDTLKRMPPADVYKVMKLTMHESLQEMALEIVRRESSEDPGSCSRLWDPNDIFEALKNDKMNRLQFLEISGKCEKDCFDKHSILAEGLQISANELRFLCWYHYPLKSLPENFSAEKLVILKLPKGEIKNLWHGVKKNLVNLKELNLTDSKMLEELPDLSNARNLEVLVLEGCSMLTTVHSSIFSLGKLEKLNLQDCTSLTTLASDSFASKLQLLLLEGSV…
HK_NBARC_NBARC.Chr09.4	Chr09	TGFam.PM	5073707	5079670	ATGTCCAACAAAGCTGCTCCGGAAATAAAGTATGATGTTTTTGTTAGCTTCAGGGGCCAGGACATCCGCGACGGGTTTCTTAGCCATTTGATTGACACTTTTGAAAGGAAGAAAATAAACTTCTTCGTAGATTATAATCTTGAGAAGGGAGATGAAATATGGCCATCACTTGTTGGAGCAATTCGAGGATCATTGATTTTGTTGGTCATATTCTCTCCAGACTATGCTTCTTCGTGTTGGTGTTTAGAAGAACTTGTGAAAATACTTGAATGCAGAGAGGAATACGGACGTATTGTAATCCCAGTTTTCTACCATATACAACCCACACATGTTCGACATCAATTGGGGAGTTATGCAGAAGCATTTGCTGTGCATGGAAGAAAACAAATGATGAAGGTG…	MSNKAAPEIKYDVFVSFRGQDIRDGFLSHLIDTFERKKINFFVDYNLEKGDEIWPSLVGAIRGSLILLVIFSPDYASSCWCLEELVKILECREEYGRIVIPVFYHIQPTHVRHQLGSYAEAFAVHGRKQMMKVQRWRHALNKSADLAGIDSSKFPNDAAVLNEIVDLVLKRLVKPHVISKGLVGIEEKITTVESWIRKEPKDNLLIGIWGMGGIGKTTLAEEIFNKLQYEYEGCYFLANEREESKNHGIISLKKRIFSGLLRLRYDDVEIYTENSLPDNILRRIGHMKVLIVLDDVSDSDHLGKLLGTLDNFGSGSRILVTTRDEQVLKAKKVKKTYHLTELSFDKTLELFNLNAFNQSDRQKEYYELSLRVVNYAKGIPLVVKVLAGLLHGKNKEEWE…
HK_NBARC_NBARC.Chr09.5	Chr09	TGFam.PM	5127727	5132898	ATGTCAAAAAATAACGCTTCTCAAACAAAGTATGATGTTTTTGTTAGCTTCAGGGGCGTTGACATCCGTCGTGGGTTTCTAAGCCATTTGATTGGCACTTTTAAAAGTAAGCAAATAAATGCCTTTGTAGATGATAAGCTTGAGAGGGGTGAAGAAATATGGCCATCACTTATTGAAGCAATTCAAGGATCATCCATTTCGTTGATCATATTCTCACCAGACTATGCTTCTTCGCGTTGGTGTTTAGAAGAACTTGTGACAATACTTGAATGCAAAGAGAAGTATGGACAGATTGTAATCCCCATTTTTTACCATATAGAACCTACAGATGTACGACATCAACGGGGAAGTTACGAAAATGCATTTGCTGAGCATGTAAAAAAATATAAGAGCAAGGTG…	MSKNNASQTKYDVFVSFRGVDIRRGFLSHLIGTFKSKQINAFVDDKLERGEEIWPSLIEAIQGSSISLIIFSPDYASSRWCLEELVTILECKEKYGQIVIPIFYHIEPTDVRHQRGSYENAFAEHVKKYKSKVQIWRHAMNKSVDLSGIESSKFQDDDELLKEIVKLVLKRLGKHLVDSKGLVGIAKKIADIESLIRKESKDTRLIGIWGMGGIGKTTLAQEVFNKLQSEYQGSYFLANEREQSSKDGIISLKKEIFTELLGHVVKIDTPNSLPNDTIRRMKVLIVLDDVNDSDHLEKLLGTLDHFGAGSRILITTRDEQVLNANKADEIYRLREFNFDKAFELFKLNAFNQSDNQSEYDELSQRVVNYAKGIPLVLKVLARLLRGKNKEVWESELDKL…
HK_NBARC_NBARC.Chr09.6	Chr09	TGFam.PM	5882067	5885898	ATGGCTCAGGTTATAGTGAACTTCATACTGCAAAATCTTGGTGATTTGCTCATTCAAGAAGCAGTGTTCCTATATGGGGTGAAAGACAAAGTGTTGCAGCTGCAAACTGAATTGAGGATGATGAGGTCTTACTTGCATGATGCAGATAGAAGGCAAAATGATAATGAAAGGCTAAGGAATTGGATTTCAGAAATCAGAGAAGCTGCTTATGATTCTGATGATGTCATTGAATCATATGCCCTCAGAGGAGCCTCAAGAAGAAATTTGACTGGTGTGTTAAGCCTCATCAAAAGGTATGCTTTGATCATCAACAAATTCATAGAAATCCACATGGTGGGATCTCATGTTGATAATGTCATAGCTAGGATTTCTAGCCTCACTAGGAATTTGGAAACTTAT…	MAQVIVNFILQNLGDLLIQEAVFLYGVKDKVLQLQTELRMMRSYLHDADRRQNDNERLRNWISEIREAAYDSDDVIESYALRGASRRNLTGVLSLIKRYALIINKFIEIHMVGSHVDNVIARISSLTRNLETYGIRPEEGEASNSIYEGIIGVQDDVRILESCLVDPNKCYRVVAICGMGGLGKTTLAKVYHSLDVKSNFESLAWAYISQHCQARDVQEGILFQLISPSLEQRQEIVNMRDEELARMLYQVQEEKSCLVVLDDIWSVDTWKKLSPAFPNGRSPSVVGSKIVLTTRITISSCSKIRPFRKLMIQAIIVLGGLLASKSTFYEWDTEYKNINSYLRREGQEQCLGEVLALSYYELPYQLKPCFLHLAHFPENLEIPTKKLIRIWVAEGIISL…
HK_NBARC_NBARC.Chr09.7	Chr09	TGFam.AUG	7726654	7742277	ATGCCTTTTTACGACGCACATTCTAAGACGATTATGCAGAACCGTCTTAGAATGTTACGTGGTGGCATTTTTGTAATTAGGGAGAATGATTGTTTTTTTCACGACTCACATTCTAAGATGGTTTTGCTTAACTGTCTTAGAATGTACGACAGTGACATTTCTGTAATAAGGGGGAACGACCATTTGACTGCCAAAGCAAAGAGAACCTCCAAACAACTTGGAACTGCAGAAGGAACCTCCATCACCTCTGGTCTTGTCGGGCTTAGCAGAATTTGGGTTGCAAAGCTAACACTTGGTCTGAAGGATCACAAGGGAAATCAGTTTGTGGAAATGTGCAAGTGCCAGACATGTGGGATATCACACTACAAAGTGAACGATGACGAATGTAGTGATGATGCA…	MPFYDAHSKTIMQNRLRMLRGGIFVIRENDCFFHDSHSKMVLLNCLRMYDSDISVIRGNDHLTAKAKRTSKQLGTAEGTSITSGLVGLSRIWVAKLTLGLKDHKGNQFVEMCKCQTCGISHYKVNDDECSDDATTNNSRPVKTIDCLYPKFGKDPRNLRLDLASDKMNPFGPRQLRNGTDVYLTPLIEDLRKLWVDEIDVYDGNVQQTFRLRAMIFYTINDFPAYENLSGYSLNGHQACPICEKKMIYIQLKHGKKIVYTRHQRFLTPYHPYRRLKKALNGTYEIESAPKPLSRHEVYDRVKDIVTIFGEGKNQKNSQVVSPLNSLGKREEKHKRIQAVSPSILLEKGEVINPQQLDDLENEASIILCELEMYFLPSFFDIMIHLIVHLVREIRLCGPI…
HK_NBARC_NBARC.Chr09.8	Chr09	TGFam.ISGAP	8222132	8225922	ATGTCAGACAATAACACTACTCCTCAAATAAAGTATGATGTTTTTGTTAGCTTCAGGGGCAAGGACATCCGCCAGGACTTTCTTAGCCATTTGGTTGAGGCTTTTGACATGAAGAGAATATATGCCTTTGTAGATAATAAACTTGAGAAAGGGGAAAAGATATGGAAATCACTTGTTGAAGCAATTGAAGGATCATTGATTTCATTGATCATATTTTCACAAGGCTATGCTTCTTCTCATTGGTGTTTAGAAGAACTTGAGAAAATACATGAATGCAAAGAGAAATATGGACAAATTATAATCCCCGTTTTCTACCATTTAGAACCCACACATGTACGATATCAATCATCTGATGCATTCGAAAAAGCATTTGCTAAGCATGGAAAAAAATATGAGAGC…	MSDNNTTPQIKYDVFVSFRGKDIRQDFLSHLVEAFDMKRIYAFVDNKLEKGEKIWKSLVEAIEGSLISLIIFSQGYASSHWCLEELEKIHECKEKYGQIIIPVFYHLEPTHVRYQSSDAFEKAFAKHGKKYESKVQQWRDILKKSADLSGIESSNFKTDAELVKKITNVVLMRLHKTHVNLKRLVGIGKKIADVELLIRKEPEDIRLIGLWGMGGIGKTILAEQVFIKLRSGYGGCLFLANEREQSRKHGMLSLKEKVFSELLGNGVKIDTPNSLPDDIVRRIGRMKVLIVLDDVNDSNHLEKLLGPLGNFGSGSRIIVTTRDMQVLKANKADEVYPLREFSLNQALELFNLNFFNQCDDQREYDNLSKRVVNYAKGIPLVLNELAYLLRARNKEEWGS…
HK_NBARC_NBARC.Chr09.9	Chr09	TGFam.PM	12170516	12171151	ATGAACTCTCCAAATGTAAAGTGGAAGGCGAATCTCAGACCAACTCTAACCAGGAATGCAATTTTAACATGGAAATTGAAAATGATGAAGCAAGTCCTTGATGACCTAGAATTTCTTGAAAGCCAAAAGGGCCATCTAGGTTTGAAAGAGTGTGTTGGATCAGGATCAGGTAGTAAAGGGTCACAAAAATTACCATCAACGTCTTTGGTGGTTGAAACTGACATTTATGGCAGAGATGATGACAAAGAAATTGTCTCTAATTGGTTGGCATCTGACACTGACACTCGTAACCAGCTATCAATACTTTCTATTGTGGGCATGGGTGGAGAGTGTAAGACCACACTTGCCCAACATGCATACAACGACCCAAGGATAGAGGGTAAATTTGATATCAAAGTT…	MNSPNVKWKANLRPTLTRNAILTWKLKMMKQVLDDLEFLESQKGHLGLKECVGSGSGSKGSQKLPSTSLVVETDIYGRDDDKEIVSNWLASDTDTRNQLSILSIVGMGGECKTTLAQHAYNDPRIEGKFDIKVWVCVSDDFDAFNVTRTILEAITKSKDKSGNLEMVHERLKEILTGKKILLILDDLWNEDRKKWEVVHTPLNYGIERNGK*
HK_NBARC_NBARC.Chr09.10	Chr09	TGFam.ISGAP	35592588	35596374	ATGGCTTTGCAATCACGTTCCTCTTCCTTGAGCTACGATGTATTCCTCAGCTTCAGAGGGGAAGACACACGTCATGGTTTTACTGGCCATCTCTACAGCGCTCTTCATAGCAAGGGAATCCACACTTTCATCGATGATGAGGGTCTTCAAAGAGGAGAGGAAATAACACCAGCACTTGTGAAGGCAATTCAAGAGTCTAAGATTGCCATCATTGTGCTCTCTATTAACTATGCTTCTTCATCATTTTGTTTACATGAACTTGCAACTATACTTGAGTGCCTTATGGGGAAAGGTCGGTTGGTTTTGCCGGTTTTTTATAAGGTAGATCCTTCTCATGTACGTCACCAGAATGGTAGTTATGAAGAGGCATTGGCTAAGCATGAGGAGAGGTTCAAAGCT…	MALQSRSSSLSYDVFLSFRGEDTRHGFTGHLYSALHSKGIHTFIDDEGLQRGEEITPALVKAIQESKIAIIVLSINYASSSFCLHELATILECLMGKGRLVLPVFYKVDPSHVRHQNGSYEEALAKHEERFKAEKEKLQKWKMALHQVANLSGYHFKDGEINPACLHVADYPVGLEWQVRQVRKLLDIGSDDGVHMIGFHGMGGVGKSALARAVYNNLIIDEKFDGFCFLENVREKSNKDGLEHLQRILLSKILGEKDINLASKQQGSSMIQSRLKEKKVVLILDDVDKHEQLQAMVGRPDWFGPGSKIIITTRDKQLLAPHQVITTYEVKGLDEKDALQLLTWKAFKKEKADPNYVEVLQRAVTYASGLPLALEVIGSNLFEKSIKEWESALKKYKRI…
HK_NBARC_NBARC.Chr09.11	Chr09	TGFam.PM	35647980	35673778	ATGGGTGAGGAGTTGAGTGTAGTGTGTTTTGTTTTCAGGGAATTCTCCCATGCCCATCTTGCGCAGATGAAGTATATACTCCCTAAAAGTGTGTGTATAGATAAGGTGCTTGTTCATGATAAGAAAAGCTTGTGTATGGTGCCTGATATGAAGATCACGTTGAGATTTGAGGTTGTGAAAGATTGCTCTGGCGAATCTGATGATCTGGCTCTTCGACGATATTTTAAATCTAAGCTGATTGATTTCTTTGATATGCATCCTGAGGTTGCTGACATTCCAGAGGCCCCACTGCCAGAACCCTTTGGCAAAAAAACTTGTAGATTGAATTTTGAAGAATTTACTGGCCAATCCCCACATGTAAATTCTTCAACGGAACTTTTGTCAATTTCCAATCAAACT…	MGEELSVVCFVFREFSHAHLAQMKYILPKSVCIDKVLVHDKKSLCMVPDMKITLRFEVVKDCSGESDDLALRRYFKSKLIDFFDMHPEVADIPEAPLPEPFGKKTCRLNFEEFTGQSPHVNSSTELLSISNQTEMLPEQLQLYPSFRRHFSRKNNTDQAEKAQCFLPTKTSPSSHASDCLDNEESEKTLQKECVPLFDGVANPITERGHQKESFSMSLQPSFINTPVQMIRPPYSVTCSNSESPDMKNISCVADSFIAETPAQSAPARLLPISDVKLQDMPTQKSTSSHKPAKRVLDFSLMGDNDGLGIGVDKLESSRALHEFDSFPESSRGCYEDCNSFGSVSAPQEGVVGVLMANGTKLPLKVLLLKEQMKNLHWVPFIYNGDGAVEEQIESLEKLV…
HK_NBARC_NBARC.Chr09.12	Chr09	TGFam.PM	35845050	35847480	ATGGCTTTGCTATCAAGTTCCTCTTCCTTCAACAACTATGATGTGTTCATCAATTTCAGAGGCTCAGACACACGCCATGGATTTACTGGTCATCTCCACAAAGCTCTTCATGACAGTGGAATCCACGCTTTCATTGATGATCATGACCTTATGAGAGGAGAAGAAATAACACCAGCACTTAAGGAGGCAATTGAAAAGTCAAATGTTGCCATTACTATGCTCTCAGAAGACTATGCTTCTTCCTCATTTTGTTTATATGAGCTTGATTACATCCTTGAGTGCCGCCGTAAGAGAAAAGATCTGTTGGTTTTGCCTGTCTTTTACAAGGTGAGTCCTTCTCACGTGGAACACCAGACAGGATGCTATGGAGAAGCATTGGCTAAGCTTAATGAAAAGTTT…	MALLSSSSSFNNYDVFINFRGSDTRHGFTGHLHKALHDSGIHAFIDDHDLMRGEEITPALKEAIEKSNVAITMLSEDYASSSFCLYELDYILECRRKRKDLLVLPVFYKVSPSHVEHQTGCYGEALAKLNEKFQPKMDDCCIKTGYEHKFIGEIVERVFSEINHKARIHVADCPVRLGSQVLKIRKLLDVGCDDVAHMIGIHGMGGVGKSTLARQVYNLITGKFEGSCFLQNVREESSKHGLKQLQSILLSQILGKKEINLASEKQGTSMIQNRLKQKKVLLILNDVDEHKQLQAIVGRPDWFAFKKNQVDPSYKEVSNHISPGKRRRIWSPKDIIQVLKDNSVSQAREWELVKFEMICVDFPMSGNEERMELDENTLEMKNLKILNIKNGNFSQRPNF…
HK_NBARC_NBARC.Chr09.13	Chr09	TGFam.PM	39569024	39573132	ATGGCTTTTATTTATGCTGCTGCTGTTGTTGGCTGTGCTTCTTCTTCTTCCTCTCCCGCTGTTTCCGAAAATCATGATGTTTTCATCAGCTTTCGAGGAGAGGATACTCGCGGTGACTTCACAAGCCATCTTCATGCCGCTCTGTGCAGAAACGGCATCCAGACCTACATAGACTACAGGATCCAGAAAGGATACGAGGTTTGGCCACAACTTGTGAAAGCTATCAGAGAGTCCACTCTCTTGTTGGTTATCTTCTCAGAGAACTATGCGTCTTCTAGTTGGTGCTTGAATGAACTCGTTGAGCTAATGGAGTGCAAGAAACAAGGAGAAGAAGACGTTCATGTACGCAAACAGAGTGGGAGTTATCACACGGCATTGGCGAAACACAAGAAGGATTGG…	MAFIYAAAVVGCASSSSSPAVSENHDVFISFRGEDTRGDFTSHLHAALCRNGIQTYIDYRIQKGYEVWPQLVKAIRESTLLLVIFSENYASSSWCLNELVELMECKKQGEEDVHVRKQSGSYHTALAKHKKDWKVSKEKMQKWKDALFEAANLSGFHSQTYRTEPDLIEDIIIDVLQKLNHRYTNDFRGLFISDENYTSIESLLKTDSGEVRVIGIWGMGGIGKTTLTAAIFHKVSSQYEGTCFLENEAEESRRHGLNYICNRLFFQVTKGDLSIDTPKMIPSTVTRRLRHKKVFIVLDDVNTPRLLEYLIGVDCDWLGAGSRVIVTTRDKHVLIRGEVDKIHKVEEMNFQNSLKLFSLNAFGITYPKKEYVESSKRAMVYAKGIPLALKVLGSFLRSK…
HK_NBARC_NBARC.Chr09.14	Chr09	TGFam.ISGAP	40322646	40326252	ATGGCTGAGAGTGCAGTGAGTTTTCTTCTCGAAAGGCTTAAACCTGTTTTTGTGAATAAGTTGAAATTGTTCACAGGGGTTGAAGCAGAAGTGATATATCTGAAAGGACAGTTGGAGTTGATAAGAGCCTTCTTAAGGGCTGCAGATGCATTTGAAGAGAGTGATGAGGAACTCAAAGTTTGGGTTAGGCAAGTCAGAGATGTTGTTCATGAGGCAGAAGATCTTCTTGATGAATTGGAACTGGTTCAGCTACATAACCATACAAATGGACTCTCTAATTATCTCAGTATCAGGAATATGAAAGCTCATTATCGGATTGCACACGAGTTAAAAGCCATCAACTCACGCATGAAAACTATTTCTTTAACTCGCAAGAGATTCCTCAGTAAACTTGACACT…	MAESAVSFLLERLKPVFVNKLKLFTGVEAEVIYLKGQLELIRAFLRAADAFEESDEELKVWVRQVRDVVHEAEDLLDELELVQLHNHTNGLSNYLSIRNMKAHYRIAHELKAINSRMKTISLTRKRFLSKLDTASEASNSTYTVNAWHDQRGDALLLDNTDLVGIDRPKKQLIGWLINGCTGRKVISVTGMGGMGKTTLVKKVFDDPEVRKHFKACVWVTVSQSCKTEELLRDLARKLFSEIRRPIPEGLESMCSDKLKMIIKDLLQRKRYLVVFDDVWQMYEWEAVKYALPNNNCGSRIMITTRKSNLAFTSSIESNGKVYNLQPLKEDEAWDLFCRNTFQGHSCPSHLIDICKYILRKCGGLPLAIVAISGVLATKDKHRIDEWDMICRSLGAEIQG…
HK_NBARC_NBARC.Chr09.15	Chr09	TGFam.ISGAP	40330824	40333637	ATGGCAGATAGTTCAGTATCCTTTTTATTGGACAAGCTGAGTTCGTTACTTGAAGCAGAAGTGAAACTACAGAGAGGGGTCCGTGAAGATGTTCAGCACATCAAATATGAGCTGGAAGGCTACAAGGGCATCTTGAGGGTGGCTGATGCTCTGGAAGACAAAAACCCTGAACTCAAAGCATGGGTTAAACGAGTAAGAGATGTTGCTCATGACATGGAAGATGCTATAGATGAATTCAGCCTTGGCCTTGTTGATCAACATGGACAAGGCAACAATTCTTCGTTTCATATGAACTTTTTCACCCGGCATAAGATTGCTTCAAATATACAAGGTATCAAATCCAGATTGGACATTATATCCCAGAAACGTCCAGACATACCTTGGATAGGCTCAGGCTCA…	MADSSVSFLLDKLSSLLEAEVKLQRGVREDVQHIKYELEGYKGILRVADALEDKNPELKAWVKRVRDVAHDMEDAIDEFSLGLVDQHGQGNNSSFHMNFFTRHKIASNIQGIKSRLDIISQKRPDIPWIGSGSSQRLSSRLDSQGDALLLEEADLVGIDKPKKQLSDLLFNEEAGRAVIPVYGMGGLGKTTLAKQVYDDPKVKKRFRIHAWINVSQSFKLDELLKDLVQQLHTVIGKPAPEAVGQMKSDQLKEVIKNLLQRSRYLVVLDDVWQVKVWDSVKLALPNNNRGSRVMLTTRKKDIALHSCAELGKDFDLEFLPEEEAWYLFCKKTFQGNSCPPHLEEVCRKILKMCGGLPLAIVGIGGALATKGRANIEEWQMVCRSLGSEIEGNDKLEDMK…
HK_NBARC_NBARC.Chr09.16	Chr09	TGFam.ISGAP	40401950	40405660	ATGGCCTTAGCTATGGTGGGAGAGGCACTTATCTCTGCTTCTGTTGAGATCTTAATAAAAAAGATAGCTTCAAGAGAGTTTCGAGATTTCTTCTCCAGCAGAAAGCTGAATGTTTATGTGTTGGATGAGTTGAAGATGAAGTTGTTGGCACTTAATGCTGTTCTTAATGATGCTGAAGAGAAGCAGATCACTGATCCTGTAGTGAAGGAATGGCTTGAAGAATTGAAAGATGCTGTCTTGGATGCAGAGGATTTGTTGGATGAAATCAACACAGATGCTTTGAGATGCGAGGTGGAGGGAGAATCTAAAACATTTGCTAACAAGGTCAGATCAGTGTTTTCTTCTAGCTTTAAAAATTTCTATAAGAGCATGAATTCCAAGCTTGAAGCAATTTCCGAA…	MALAMVGEALISASVEILIKKIASREFRDFFSSRKLNVYVLDELKMKLLALNAVLNDAEEKQITDPVVKEWLEELKDAVLDAEDLLDEINTDALRCEVEGESKTFANKVRSVFSSSFKNFYKSMNSKLEAISERLEHFVRQKDILGLQSVTRRVSYRTVTDSLVESVVVAREDDKEKLLSMLLYDDDAMSNDIEVITVLGMGGLGKTTLVQSLYNVTEVQKHFDLTAWAWVSDDFDILKVTKKIVESLTLKDCHITNLDVLRVELKNNLRDKKFLLVLDDLWNEKYNDWHHLIAPFSSGKKGSKIIVTTRQQKVAQVTHTFPIYELKPLSDENCWHILARHAFGNEGYDKYPSLEGIGRKIARKCNGLPLAAKTLGGLLRSNVDVGEWNRILNSNLWAH…
HK_NBARC_NBARC.Chr09.17	Chr09	TGFam.PM	40505735	40506244	ATGGGAGAACTGGGAAAAACAACTCTTGCCAAGCTGGTTTTTGACAACAAGGAGGTTTATGCATGCTTCAATTGTCACTTGATAACAAAACTCAGAAATGGCTTGCGCAATAAGACGTATGTTGTCGTGTTTGATGATCTATGGAGTAGAAGATTTTGGAATGACATTGAATTTTCTCTGACTGATGATAAAAATGGAAGTAGGATATTAATCACAACACGGGACACAGAGGTTGCACAGTTTAGTATGAAAAATTCTTTAATTCAGCTTCGTGTGCATAAGCTAGAACCTTTAAGTGAAGAAAAGTCTTTGGAATTGTTATGTAAGAATGCATTTGGGTATGGTTTTGATGGATGTTGTCCAAAAGAATATGAAGATGTAGGTCTTGAAATCGTTGGA…	MGELGKTTLAKLVFDNKEVYACFNCHLITKLRNGLRNKTYVVVFDDLWSRRFWNDIEFSLTDDKNGSRILITTRDTEVAQFSMKNSLIQLRVHKLEPLSEEKSLELLCKNAFGYGFDGCCPKEYEDVGLEIVGKCQCLPLVVFVIGSLLYSKCGSAAEWKRFSQNLSLG*
HK_NBARC_NBARC.Chr09.18	Chr09	TGFam.ISGAP	40553223	40555154	ATGTTTTGGGGTGCTGAGAAAAAACAAGTAACAGGTCATGCAGTGAAGGATTGGCTGCAAAAACTAACAGATGCAGCATATGTGCTTCATGATATCTTGGATGAATGTTCAATACAATCCATCTATCCCATATTTGGCATGGCTGGACTTGGGAAAACAACACTTGCCAAACAGGTCTTCAATGATGCAAACATTTTGACTGGACTATTTGGAGTTCATCATTTACACTTGTTAAATTCTAATGAGTCCATCAATATGGTTGCCTTTAAGAAAGTTGAATCCTTGCGGACTTTTCTTGATTTTGGTTTTAATCTTGGGCATGTTCGTCGGTTGCCATCAATCCATTGTCTCCGAGCACTACGCACAAGCTCTTCTCTGTTATCCCCACTAAAGGATTTA…	MFWGAEKKQVTGHAVKDWLQKLTDAAYVLHDILDECSIQSIYPIFGMAGLGKTTLAKQVFNDANILTGLFGVHHLHLLNSNESINMVAFKKVESLRTFLDFGFNLGHVRRLPSIHCLRALRTSSSLLSPLKDLAHLRYLNLHGNSVTSLPNFICGLKKLQILKLEYFRSHNLLPKDLTRLQDLRHVVISSSPSTINVIDQ*
HK_NBARC_NBARC.Chr09.19	Chr09	TGFam.PM	44051624	44065404	ATGTCCGGTCCTCACCGGAGTACGGCGAGACCCTGGCCGGAGCTTGACGAATCCGATGACGGGTCCGGCGTGGCGCTTCATCATCTCCTGCTGGATCTGCGAGGGATCGAGCTTGGAGATATCGGAGGAAGGGAAAGGGGGTTCGGGTTTCTTGCCCCATTCTCGCCACGCGTCGTCCTCCTCGTCGTCGAACACGTCGTCCAACTCGTCGGGGATGTGAACCTTGCGCTTTCCGGCGAGGGCAAAATGGGAATTTGCGGACGCGAGGAGGAGAAGGAGAAGGAGAGTGGGGACTGGTTGGAAGGTCATGGGGGAAGAGAGGATCAAATGAGGAATGATGCACTCTCGAGTTCTTACACCTTGATCTTAAATGTAAGAATTGATCTTGCAAAGTTCAAT…	MSGPHRSTARPWPELDESDDGSGVALHHLLLDLRGIELGDIGGRERGFGFLAPFSPRVVLLVVEHVVQLVGDVNLALSGEGKMGICGREEEKEKESGDWLEGHGGREDQMRNDALSSSYTLILNVRIDLAKFNLAMMDFIGPVLELIIRMWDCCACVREFEENLSCLRDIASDLRGVWIDVSVRVEVAEAQYLRRLNEVNDWLDKVEAMQREVEAIQQKVSQVQETHSRCLGSFCPGNFPTSCWMGRVIAQKIGEIRELIDKGHFDVVAQEMPHALVDEIPLEATVGLESTFDELGACFDDNHVGVIGLYGMGGVGKTTLLKKFNNEFLPTAFYDVVVWVVVSKEADVGNVQQSILEKLKVPDGKWVGKAINERAIVLYNILKRKKFVLLLDDLWERID…
HK_NBARC_NBARC.Chr09.20	Chr09	TGFam.PM	46377052	46381344	ATGCTTCTGATACTGAATGTGAGGGTTCTGCAAAAGGTCGAGAAGGTGCAAAGAACAGGAATTGCAAACTTGGAATGTGCAGTTCTCTCGTCTGGCAATAATAAAGATGTTATGCCGCTTGATGCTACTGGAATTCATACTTTCACCGATGATGAAGAGCTTAGAAGAGGGGAGGAAATTACACCAGCTCTTCTCAACGCCATTCAAAATTCGAGGATTATATTGCCCATCATTGTTTTCTCCAAGAACTATGCATCCTCAACGATTGTTTGGATGAACTTGTCAAGATCCTTGAGTCTCAACCAGTATAAGTTTATCTGCAAGATTGTCGAAGAGGTCTCTGAAAAGATTAATTGCATTCCTTTACACGATGCTGATAATCCAATTGGGCTAGAGTCT…	MLLILNVRVLQKVEKVQRTGIANLECAVLSSGNNKDVMPLDATGIHTFTDDEELRRGEEITPALLNAIQNSRIILPIIVFSKNYASSTIVWMNLSRSLSLNQYKFICKIVEEVSEKINCIPLHDADNPIGLESAVLEVKYLLEHGSDVKMIGIYGIGGIGTTTLARAVYNLIFSHFEDDVDKLEQLKVLAGNWFGSGSIIIITTRDKHLLATHGVVKLYEVQPLNVEKALELFNWNAFKNSKADPSYVNISNRAVSYAHGIPLALEVIGSHLFGKTLNECNSALDKYERIPHERIHEILKVKL*
HK_NBARC_NBARC.Chr10.1	Chr10	TGFam.AUG	5643379	5644776	ATGGTGAGAACACCGTCTTGTGACAAAAGTGGAATGAGGAAAGGTACTTGGACTCCAAAGGAAGATATGAAGTTAATTGCTTATGTTACTAGGCTCTGTAAAAAGAAAATTCTTTTGGTTTTGGATGATGTTGACAAGTTGGTTCAATTAGAACATCTTGCAGGTGGACTAGATTGGTTTGGTTTTGGAAGCAGAATTACTATCACAACTACAGATATACATCTGCTGCATGTTCATGGTGTTGAAAGAGCCTATGAAAGGAAACAAGTTAATCCTAGTTATATAGACATTGCAAATAGAGTAATACAACATTCAAATGGCCTTCCATTATCACTGGAAATAATAGGTTCCATTTTATGTGGTAAAACAGAGCTGGATTGGAAGTCAGCATTAGATGCT…	MVRTPSCDKSGMRKGTWTPKEDMKLIAYVTRLCKKKILLVLDDVDKLVQLEHLAGGLDWFGFGSRITITTTDIHLLHVHGVERAYERKQVNPSYIDIANRVIQHSNGLPLSLEIIGSILCGKTELDWKSALDAYERIPHKNIQEILRVSYDSLQEFEKKMFLDMTCFFKGYRLGEVINFSYWDVHNKDSMDFE*
HK_NBARC_NBARC.Chr10.2	Chr10	TGFam.AUG	9426613	9427473	ATGTTGGCTACTGGTAATCGATTACTACTTTTTGGTAATCGATTACCAAAGAGTAAAACTCTTTGCATAGGTAGGGTGGGTACGACCACGCTCACCCAACATGTATACAATTACCCAAGGATGGAGGAGGCTAAATTTGATATCAAAGCTTGGGTTTGTGTTTCAGATGATTTTGATGTTTTGACGGTGACAAGAACAATTCTTGAGGCAATCACTACATTAAAAGATGATGGTGGAAACCTAGAAATAGTTCATCGAAGATTAAAAGAAAAATTAGTAGGAAAGAGATTTCTTTACATTTTGGATGATGTTTGGAATGAAAAACAAGAGAAATGA	MLATGNRLLLFGNRLPKSKTLCIGRVGTTTLTQHVYNYPRMEEAKFDIKAWVCVSDDFDVLTVTRTILEAITTLKDDGGNLEIVHRRLKEKLVGKRFLYILDDVWNEKQEK*
HK_NBARC_NBARC.Chr10.3	Chr10	TGFam.PM	11269852	11279697	ATGCCCTGGCGACGGAGGAGTGCGATGGAGTCAGGGGCGTGGGGATTGCACGTGACGTCGAACGTTAGCCTTCGACACAGCATAGTTGTTCTCCGGTTGCCGGAGAGCGGGATGGGAGTGCACGACAACGCCTGGAAAATCAGTGTCCATGGAAATGAGAGGGTGGGAGACAATGACAGAACGGATGAACTCAAACTCCGATTCAAGGTTGAAGGACAACACTGGTCGCGTGACAATCGAAGGATGTGGGAGGAGCATGATGATGATTTTCTTGTGAAGGTGCCGGTGTTTATTGTTGTGGTGGTTGGTTCATCGTCGGCGACATACGAGAGACTAAGTGAGGTTGACCTTATGCGTTTGAGTTCATTTGTGGTTGCATTACTTCAGCGGTTCAAGGGT…	MPWRRRSAMESGAWGLHVTSNVSLRHSIVVLRLPESGMGVHDNAWKISVHGNERVGDNDRTDELKLRFKVEGQHWSRDNRRMWEEHDDDFLVKVPVFIVVVVGSSSATYERLSEVDLMRLSSFVVALLQRFKGGITNICYNLLELGFEGGALIWGEANRDVDVDLSLIVVTAAQGLPWFVLSLLALYCKFKVSERFPFLLRAWWFLSFVICLCTLYVDAAEATLRRRLHADQKEDDFVPLESVITPLEGFELGGKCPTELQGMSNNIVRKCKGLPLAIVAIGGLLSTKSKTMFEWQKVNQNLNLELQCNAHLTSLTKILSLNYDNLPYYLKPCLLDKTLTSTSMEQHQQKMNMQSRGEDHHHHAANNVEEERATRTGSRTTSPIAEERIEEDEVQSQKE…
HK_NBARC_NBARC.Chr10.4	Chr10	TGFam.PM	13013922	13015008	ATGGCCGAATCGCTTCTTTTCACAGTTGCAGAATCACTGATAGGGAAGCTCACTTCTCGTGCCATTGAAGAAGCTTCTTTGACGCTGGGTGTGTACCGTGATCTACAAGACATGAAAGATAAAATGGCCCTTATCAAAGCTTTCATGTTAGATGCTGAGCACAAGAAGCCACACAACAATGTGCTGAGCGAATGGCTGAGACAGATCAAGCACGTGTTTTCTGATGCTGAAGACATAGTCGACGATTTTGAGTGTACAGCATTGCGGAAGCGTGTTGTCAACATGGTAGCTGCTCAAGTAAGAATGGCGCGTGAGATAAAAGATATCAACAAGAGGTTGGCCAAAGTTGCGGCTCAAAGAGACATGTTTGGCCTTCAAATCAATGAGAAGGATACGCAT…	MAESLLFTVAESLIGKLTSRAIEEASLTLGVYRDLQDMKDKMALIKAFMLDAEHKKPHNNVLSEWLRQIKHVFSDAEDIVDDFECTALRKRVVNMVAAQVRMAREIKDINKRLAKVAAQRDMFGLQINEKDTHVVDMREMTHSHVNHLNVIAREDDKNKIIKLLLQDGHDKSLSVIPIVGMGGLGKTTLAKLVFNEITNIDECFPLKMWVCVSNNFELRIVLIKIRNSAPNPTSEKLENFETEQLQNHLRHTLQDQKFLLILDDVWEDDNARWDELKEIIIDTGVEGSKILVTTRSPLIATLMCSNSSNSYLLEGLSKDDSFYLFLKLAFKEGEDKKHSQLLEIGR*
HK_NBARC_NBARC.Chr10.5	Chr10	TGFam.PM	29297193	29299352	ATGGAATCTTGTGTTGAAGAATTAAGAAGGCTTTTATGTTTGGAGTCAGTTAATGATCTTCAAGTTATTGGAATTGGAATACGTGGAATGGGTGGAATAGGAAAGACGACTCTTGCTCATGTTTTATATGAAAGAATCTCTCATCAATATGATTTTCATTGTTATATTGTTGATGTAAGCAAAATTTATCAAGATTCTAATATATTAGGGGTACAAAAACAACTACTTTCTAATTATTTGAATGGTAAAAATCTAGAGATTTGTGATGTTTATGAGGCAACAACAGTTACAGTTTTTGATATCGATCAAGTTGAACAATTAAATATGTTTATTGGGAGTGGTAAAACACTATTACGTCAATGCCTAAGTGGAGTGAGCATAATCATCATAATTTATAGG…	MESCVEELRRLLCLESVNDLQVIGIGIRGMGGIGKTTLAHVLYERISHQYDFHCYIVDVSKIYQDSNILGVQKQLLSNYLNGKNLEICDVYEATTVTVFDIDQVEQLNMFIGSGKTLLRQCLSGVSIIIIIYRDQHIVKTLGVSAIYLVQLLNREDSIQLFCQNDFKLNYTQSDYLVLTYGVLSHAQGNPLPIEVLRPSLFGQNFSQWGSALARLRKNNSKSIMDVLRTSFDVLDNTEKEIFLNIVCYFNNYKEQYVKKILNFHGFHLEYGLQVLIDKSLITIRERWIVMDLLLINLGRCIVQEELALGKWTRLWDYLDLYKVMFEDMPNKLVELFLPNSNIDQLWKGKKLRHIDSSIDHLRKLTFVNLKNCRKLVKLPYFGDGLNLEQLNLRGCTQLT…
HK_NBARC_NBARC.Chr10.6	Chr10	TGFam.ISGAP	40152305	40159137	ATGAAGATCTCATCTTTTAGATACATTGAATGCAAATTTGTGGGTGGCTGTGACCAGATTATCCCTTTACGTACTTTGAAGCTGAAGTTAGAATTGAAACTCGATGTGAGCACGTTGGTTCTGGAGTGTAGATTTTGCAAGTTGATTTACAAATCTGAAATTATTCAATTTGGAAGCAAGTGCCTATTTCAATATATTTTGAATATTCGATCTATTCTGTATCTTCCACAACTTTGCTTATGCAGTTTGACAACTCATTTGGTTTGGAACGTGAATGTTGAAAGAGTTTTCTTATCTACTTGTCATCAAAGATGCTTCTATGATATTATAAATTGTATTCCTAAAGGTAATTACAATTTGCAAGCCTCCCAGTCCCAGAAAAGAAGTGCAATGGCGAAA…	MKISSFRYIECKFVGGCDQIIPLRTLKLKLELKLDVSTLVLECRFCKLIYKSEIIQFGSKCLFQYILNIRSILYLPQLCLCSLTTHLVWNVNVERVFLSTCHQRCFYDIINCIPKGNYNLQASQSQKRSAMAKHVMSSSCPKKYDIFISFRGEDIRTTFIGHLRSALSGPNIKAYADDHDLQKGQEIWPSLCQAIQDSHFAIVVFSENYAESKWCLKELVQILHCRKTQGLVVIPVFYQVDPSHIRKCTGTYGEAIAKHKDNQSVQDWKAALTEAANISGWDTRSRDNKNESQLIEKIVLDVSEKLRSPFKLKEVEDFVQIEKHCGEVKLLLSKNQDQLQKNVHVIGIWGMGGIGKTTIAKALFSQLFPQYDAVCFLPNVREESQRMGLTSLCDKLLSK…
HK_NBARC_NBARC.Chr10.7	Chr10	TGFam.ISGAP	40163174	40166542	ATGTTGTCATCATTGTGTCCTAGAAAGTACCAAGTTTTTATTAGCTTCAGGGGTGAGGATGTCCGCACCAGCTTCATTAGCCATCTTCGTTCTGCTCTCTCCCGGGACAACATCAAAGCATACATGGATGACCACAACCTTCAAAAAGGAGACGAGCTTTGGCCCTCATTGTGCCAAGCAATTCAGGATTCAGAGCTTGCCATCGTCGTATTCTCCGAACACTATGCTGCTTCAAAGTGGTGCTTGAATGAGCTGGTGGAAATACTGCACTGCAGAAAATCTCAGGGCCTGGCAGTGATACCCGTGTTCTACGAAGTGGATCCATCACACATAAGGAAGTATGATGGCACTTGCGGTGAAGCAATCTCAAAATACGAGACATATTTTGGTGACAAAGAC…	MLSSLCPRKYQVFISFRGEDVRTSFISHLRSALSRDNIKAYMDDHNLQKGDELWPSLCQAIQDSELAIVVFSEHYAASKWCLNELVEILHCRKSQGLAVIPVFYEVDPSHIRKYDGTCGEAISKYETYFGDKDNESIQKWKAALAEAAHISGWDSHSREYKNDSQLIEKIVVDVSEKLSQGTPFKLKVEDFVQIEKHCGEVKLLLSKNQDQLQKNVHVIGIWGMGGIGKTTIAKALFSQLFPQYDAVCFLPNVREESRRIGLTSLRHKLLSDLLKEGHHERRLSNKKVLIVLDDVDSFDQLDELCEPCNYVGPDSKVIITTRNRHLLRGRVDDRHVYEVKTWSFAESLELFSLHAFNERRPKKGYEDLSNRAVNCARGVPLALKVLGSNLYSRSIKFWD…
HK_NBARC_NBARC.Chr10.8	Chr10	TGFam.ISGAP	41202525	41204675	ATGAACCAATTACTCTCGGACGAGAAAAGTCGCTGCATTACTTCAATTGTTGGAATTGAAGGTACAGTGCCTCCAAGTTGTACGGTTGAACAACTTCTACAAGAAGTAGCCGAAGAGGCTGCCAAACAAATTATGGGTGGCCAGCAAGACAGATGGACAACACAAGTTGTATTCACAACTTTGGCGAATACAAAGTATCTCATTGTTGTTGATGGCATCAAAACTTCCCATGTCTTGGATACCTTGAGAGAGACCATACCTGACAAGTCGACAAGAAGCAGATTTCTTCTTACCACTTGCAATGCAAATGTATTGCAACAAGCGGGTACAAGATCCTTTGTTCTTCCTATCCAGTTACTAGACGATGAAAATAGTTGGATTCTGTTTACAAGAATTTTG…	MNQLLSDEKSRCITSIVGIEGTVPPSCTVEQLLQEVAEEAAKQIMGGQQDRWTTQVVFTTLANTKYLIVVDGIKTSHVLDTLRETIPDKSTRSRFLLTTCNANVLQQAGTRSFVLPIQLLDDENSWILFTRILRDVPLEQTDAEKEIVNCGGLPSEILKMSELLLHEDAREQSIIGQNPWSETLNTVCMNLPSYLRRCLFYFKLFPADFGIPVRRLIVLWVAEGLVHQGEDQGPPELIAEKYLAELIDLNMVQIAKRKPNGKVKTCRLPNPFREFLLNAAVPTNSRIRQVADRFDENDTWHRHIHGNTTTSDSASLLTNYKDVLSFLSFDAREGSKPGQDISNFLNLCISSNCLLLLRVLDLEGVYKAKLPKNIGRLTRLRYLGLRWTYVESLPSSISS…
HK_NBARC_NBARC.Chr11.1	Chr11	TGFam.PM	2526302	2529133	AAGCTTGATGTTTCTGTGTTGGATGAGTTGAAGACAAAGTTGTTGACACTTAACACTGTGCTCAATGATGCTGAAGAGAAGCAGATAGACAATGTTGCATTAAAGGAATGGCTTGGTGAGTTGAAAGGTGTTGTCTTAGACGCAGAAGATTTGTTGGACGAAATCAACACAAATGCTCTGAGATGCAAGGTGGAGGGAGAATCTAATAAGTTTTCTACAAAGGTCAGATCATTGGTTTTTTCTCGCTTTAAAAAATTCTATAGGAGCATGAATTCCCAGCTTGAAGCAATATCTAGAAGGCTAGAACATTTTGAGACAGATATTCTTGGCTTGCAAAGTGTTACTAGGAGAGTCTCTTATAAAATAGTAACAGATTCACTAGTTGATTCTGTGGTGGTT…	KLDVSVLDELKTKLLTLNTVLNDAEEKQIDNVALKEWLGELKGVVLDAEDLLDEINTNALRCKVEGESNKFSTKVRSLVFSRFKKFYRSMNSQLEAISRRLEHFETDILGLQSVTRRVSYKIVTDSLVDSVVVAREDDKEKLLNMLLSDDDSMSNDIDVITILDMGGLGKTTLAQSLYNDAWVSDDFDIPKVTKKIVESLTSKDCHITNLDVLCVELKNSLKDKKFLLVLDDLWNEKYNDRHHLIAPLNSGKNGSKIVVTTRRQRVAQVTDTFPIYELKPLKDENCWRILARHAFGNEGHDKYSSLEEIGRKIARKCNGLPLAAKTLGGLLRLNDDAGKWNRLLNSNLWAHDDVFPASQISYFHLPTHLKRCFAYCSIFPKQCFLQQIDREKALESVGD…
HK_NBARC_NBARC.Chr11.2	Chr11	TGFam.ISGAP	4442797	4447221	ATGGCAGATCTGTTCAGTGGAGGTGCCGTGGGGGCAGTGATGGGGGAGTTGCTGAAAGGGGCAATTGCGACCATAAACAAAGGTCGAGACTTCGGACCCACCCTCGAGAGCAACATAGAAACCTTAAACTCTCTGGCTCCTCAAGTGGAGGAGATGAAGCGTTACAACAAGATGTTGGATCGCCCCATAGAGGAGATAGCGAGGTTGGAGTCTCAAATGCAAGCTGGCGAAGAGCTGGTTCGCAAGTGCTCCAAATTCGGTCGCTGGAGAATGCTCTCTTTCCCTTATTACCAGAGCAAGCTTAAGAGCAACGACGCGAATTTGAAGAGGCACTTTTCGGTCAACGTTCCGGCGGAGAACAAGAGGGACTTGATGGAGGTGGTGGCCAGTGTGAGACAG…	MADLFSGGAVGAVMGELLKGAIATINKGRDFGPTLESNIETLNSLAPQVEEMKRYNKMLDRPIEEIARLESQMQAGEELVRKCSKFGRWRMLSFPYYQSKLKSNDANLKRHFSVNVPAENKRDLMEVVASVRQILEILSKKEDFRHSFHLRGLSGAPQEPECVGMDVPLSKLRIDLLKDGVSVLVLTGLGGSGKSTLAKKICWDPQVKGKFEGNIFFVTVSKTPNLKYIVETLFEHCGCPVPKFQSDEDAINRLGVLLRLVGKNPILLVLDDVWPSSEALVEKFKIDIPDYKILVTSRVSFPRFGTPCQLDKLDHDHAVALFCHFAQLNGKSSYMPDEKLVDEIVRGCKGSPLALKVTAGSLCQQPYEVWQNMKDRLQSQSILLESSSSDLLFRLQQSL…
HK_NBARC_NBARC.Chr11.3	Chr11	TGFam.ISGAP	5367170	5369932	ATGGCCGAGGTTGCTGTGTCAACGGTCGTTACCAAGCTGACGGGGCTGCTGGTGGAACAAGCAGCAGTGGCGGCGGTGTCTGTTTCACAGCTGGCAGGGGTAAGAGAGCAAGTGGAGAATTTGAAGAACGAATTGGGGTGGATGCAGAGCTTTCTGAGGGACGCAGATGCAAAACAAGAAGGCAACGACCGCGTTCGCATGTGGGTGTCGGAAATCCGAGACGTGGCTTTCGAAGCAGAGGAACTCATAGAAACCTACGTGTACAAGACCACCATGCAGGGAAGCTTAGACAAGGTCTTCAGACCCTTTCATCTCTACAAGGTCAGGACCAGGATCGACAAGATCCTCTCCAAGATCAAGAGCATATCCGACAGGCGCGAGACATACGGCGTCGTCGTA…	MAEVAVSTVVTKLTGLLVEQAAVAAVSVSQLAGVREQVENLKNELGWMQSFLRDADAKQEGNDRVRMWVSEIRDVAFEAEELIETYVYKTTMQGSLDKVFRPFHLYKVRTRIDKILSKIKSISDRRETYGVVVMTRDDGNNSNERLRHWRQPSPYSEEEYVIELEDDMGLLFTQLLAVEPTPHVVSIVGMGGLGKTTLAKKLYNHARITNHFECKAWVYVSKEYRRRDVLQGILKDVDALTRDGMERRIPEEELVNKLRNVLSEKRYLVVLDDIWGMEVWDGLKSAFPRGKMGSKILLTTRNWDVALHVDACSNPHQLRPLTEDESFRLLCNKAFPGAKGIPLELVQLESLAKEIVVKCGGLPLAVVVVGGLLSRKLKSSGEWKRVLQNISWHLLEEQE…
HK_NBARC_NBARC.Chr11.4	Chr11	TGFam.PM	14289131	14297182	ATGGAATTCCTTTACGGGTTTGCATCCTCTATTTCAAGAGACTTGGTATGTGGAGCAGTAAATCAATTACGTTATCCTTGTTGCTTTAACAATTTTGTTGAAGAGCTTGAAAAAGAAGAAGGCTATTTGATTGCAACAATAGATAGTGTCCAAAACCGTTTTGAACTCGCCAAGAAACAAACGAGAAAGGTTGCTGAAGTTGGTGATAAGTGGCTAAAGGATGCTAACATTGACGCAAACAAAGTGAATCAGTTGCTAAAAGAGGCCAGAACAAAAAAGAGTTCCTGTTTTGGGCACTGTCCAAATTGGATTTGGCGATATCAATTAGGAAAGAAGTTAGCAAATAGAAAAAGGAAACTTGAAAAGTGCATTGAAGAAGGTAGACAATATGTTGAAATT…	MEFLYGFASSISRDLVCGAVNQLRYPCCFNNFVEELEKEEGYLIATIDSVQNRFELAKKQTRKVAEVGDKWLKDANIDANKVNQLLKEARTKKSSCFGHCPNWIWRYQLGKKLANRKRKLEKCIEEGRQYVEIESIATLPFGTHDFLSEKSLTFESRQPAYEQLMEALKDDEVAVIGLYGMGGCGKTTLAMEVRKKVEAERLFDEVLFVPVSSTVQVQRIQEKIASSMQYIFPENEEMERAQRLYTRLTQDNRILVILDDVWEKLDFGAIGIPSTEHHKGCKILITTRSEEVCTMMDCHKKIHLPILTDGEAWNLFQKKALVSEGASDTLKHLAREISDKCKGLPVAIAAVASSLKGKAEEVWSVTLMRFTSSKPVNIGKGLQNPYTCLQLSYDNLDSE…
HK_NBARC_NBARC.Chr11.5	Chr11	TGFam.PM	15434456	15434884	ATGGGAAAGAAATTTTTGCTTGTTTTAAATGATGTTTGGAACGAAAACTACTCCAGTTGGGAGGTACTACAAATCCCCTTCATTTATGGATCTTCAGGAAGCAGGATTCTTGTTACCACTCATTATGAGAAGGTAGCATTAGTCATGAACTCCTCCCAAATATTTCATTTAAAGCCATTGGAGAAAGAAGATTGTTGGAAGCTATTTGCGAATCTTACGTTTCATGACAAGGATGCCAGCAAATATCCATATCTTGTATCAGTTGGCACTAAAATTGTTGACAAGTGTAGAGGATTGCCTTTAGCTATAAAAGCATTGGGGAATATCTTGCAAGCGAAATTCTCCCAGCACTATTGTTTTAAGATGTTGGAAAGTGATATGTGGCACTTATCAGACAAT…	MGKKFLLVLNDVWNENYSSWEVLQIPFIYGSSGSRILVTTHYEKVALVMNSSQIFHLKPLEKEDCWKLFANLTFHDKDASKYPYLVSVGTKIVDKCRGLPLAIKALGNILQAKFSQHYCFKMLESDMWHLSDNECNINPSLR*
HK_NBARC_NBARC.Chr11.6	Chr11	TGFam.AUG	18186257	18188519	ATGGGAAAGAAATTTTTGCTTGTTTTGGATGATGTTTGGAATGAAAACTATTCGAGTTGGGAGGCACTACAAATTCCCTTCATTTATGGATTTTCAGGAAGTAGGATTCTTATTACCACTCGTAATGAGAAGGTAACATCAGTCATGAACTCCTCCCAAATACTTCATTTAAAGCCACTGGAGAAAGAAGATTGTTGGAAGCTATTTGCAACTCTTGCATTTCATGATAAGGATGCCTGCAAATATCCAAATCTTGTATCAGTTGGTAGTAAAATTGTTGACAAGTGTGGAGGATTGCCTTTAGCCATAAGAACATTGGGAAATGTCTTGCAAGCAAAATTCTCCCAGCATGAATGGGTTGAGTTTGACAAGGATCAGTTAATCCAGTTGTGGATGGCA…	MGKKFLLVLDDVWNENYSSWEALQIPFIYGFSGSRILITTRNEKVTSVMNSSQILHLKPLEKEDCWKLFATLAFHDKDACKYPNLVSVGSKIVDKCGGLPLAIRTLGNVLQAKFSQHEWVEFDKDQLIQLWMAEGLLNFWQINKSEEELGAEFFNDLVARKHSGFDVKELGNPNNLQGTLSIFKLENVTDPTNAMEANKKDKKHLEGLVLDWGDKFGRSNENEDKIVEGHVLESLHPNEVIGPEFCSNDSSHVSFRSLEILKFKEMSAWKEWCNFEGEVPKAASIHKLKLRRCETIFLKDSPSSLKRASIQGTHLIESCLEQIMLNNAFLEELKIHYFHGPNLKGPMLDSLGTLSLASLSANLRSQHF*
HK_NBARC_NBARC.Chr11.7	Chr11	TGFam.AUG	18188565	18189235	ATGGATGAGATGCTCAAAAGGCTAGATATTGTGCTGAATTCTATCAACCAAGTGTTGGAGGATGCTGAGGAAAAGCAGTACAGAAGCCCTAATGTGATGAAGTGGCTTGATGAGCTTAAAGAAGCTATATATGAAGCAGAGTTGCTGTTAGGCGAGGTTGCTACGGAGGCGTCACGACAGAATCTGGAAGCTGAATTTCAGCCTGCTACTAGCAAGGTGCGGGGCTTCTTCATGGCTTTGATTAATCCATTTGACAAAGAAATTGCATCTAGGGTCAAAGAATTACTAGAGAACATAAATTTTTTGGCAGAGCAAATGGATGTGGTAGGACTGAGAAAGGGAATTTGTGCTGGCATTGAAGTTGGAAACTCCCCAAAAGATTGCCAACTACATCCTTGG…	MDEMLKRLDIVLNSINQVLEDAEEKQYRSPNVMKWLDELKEAIYEAELLLGEVATEASRQNLEAEFQPATSKVRGFFMALINPFDKEIASRVKELLENINFLAEQMDVVGLRKGICAGIEVGNSPKDCQLHPWWMNPPYVVERVPVVSIVGMGGIGKTTLAQLVYNDQTVQDQFDLKAWVYVSQDFDVVALTIAILKALRSLAA*
HK_NBARC_NBARC.Chr11.8	Chr11	TGFam.ISGAP	18417464	18422184	ATGGAAATGGAGCACAGAGTGATTCCGTTTTCCACGAGAGGGTGGAGGAGGACTTATGATGTTTTCCTCAGTTTTAGAGGAGAGGATACCCGTTTTGGTTTCACTGGTCATCTCTACAACACTTTACGTCATAGAGGGATCAACACTTTCATGGATGATGAGGCGCTTGAGAGAGGAGAACAAATATCAGAAGCCATTTTCAAAGCAATTGAAGAGTCTGGGAAAGCCATCGTTGTGTTCTCGAAAAACTATGCATCCTCAACATGGTGCCTTGAAGAACTTGTCAAAATCCTCAGTTGTATGAAAACTAAGGAACTTAAAGTTTATCCACTATTTTACAACGTGGATCCATCTGAGGTACGGTACCAGAGAGCAAGTTATGGTCAGCAATTGGCTAAG…	MEMEHRVIPFSTRGWRRTYDVFLSFRGEDTRFGFTGHLYNTLRHRGINTFMDDEALERGEQISEAIFKAIEESGKAIVVFSKNYASSTWCLEELVKILSCMKTKELKVYPLFYNVDPSEVRYQRASYGQQLAKHEIKMKYSKQKVQNWRLALHEAANLVGWHFKDGHGYEYEFITRIVDVVGISKPNLLPVDEYLVGIESRIPKIIFRLQMTDPTVIMVGICGVSGIGKTTLAQALYNHISPQFEGSCFLNDVRGSSAKYGLAYLQEGILSDIAGENIKVDNEHKGIPILIRKLHGKRVLLILDNVDKLEQLEYLAGECNWFGLGSRIIITSRCKDVLAAHGVENIYDVPTLGYYEAVQLLSSKVTTGPVPDYYNAIWERAVHCSHGLPLVLKDIGSDL…
HK_NBARC_NBARC.Chr11.9	Chr11	TGFam.PM	19442450	19443481	ATGGATTCTAAAATTGTTGAATACTCGGTTAAACCTGTTCGGAGTCAATTTGGTCTTGATTACATAACCTCCTACAAAAGCAACCTTGGAAAGCTCAAAATCGAGGTTCAAAACCTGGAGGCCACCAAAAATAGTGTGCAAAAATCTGTTGATGAGGCTAAAAGAAATGGAGAAAAGATTGTAGATAATGTCCAAATTTGGCTAAAGAAAGTGGATGCCATTATTTCTGAGGGAAAGAAACTTATTGACAATAATGATGTCCATGCAAAAGATAAATATTGTATGAGATGCTTCCAAAATTTATGGTCTAGGCACCAACAGAACAAGAAATCCAAAAAGACGATGCAAGATATTCATGAAGTCTTAGCAAGAGGAAATTTTGATAAAATTTCTAAACCA…	MDSKIVEYSVKPVRSQFGLDYITSYKSNLGKLKIEVQNLEATKNSVQKSVDEAKRNGEKIVDNVQIWLKKVDAIISEGKKLIDNNDVHAKDKYCMRCFQNLWSRHQQNKKSKKTMQDIHEVLARGNFDKISKPSTLKEIQLVLKDPEIYMIGLYGIDGVGKTTLAKELAWQVEKDGSFDVVVMAEVTDSLDVENIQGQIANALCLNFEEKTKEGRAEQLRQRINKQKNMLIVLDDICRVDLAELGIPYGDDHMGCKLLLTTKNLNLLKRQMGTQKDFRLEVLSDDDSWKLFKNIAGDVVEKNYITLIAQDVVEFCDGLPLFIVVIAKALRNKDVSTWMDALNQ*
HK_NBARC_NBARC.Chr11.10	Chr11	TGFam.PM	20041739	20045094	ATGGCTGAGCAGCAAATCTTTAGTGATTTTGCTTCTTCCTCTAACTCTTCTAGAAAATATGGTGTTTTTCTAAGCTTTCGATGTGAGGACACCCGTAAGAACTTCACAAGCCATCTTTATGAAGCTTTGATGCAAAAGAAAATTGAAACCTATATGGACTACCAGCTTGAAAAGGGAGATGAAATCTCTCCAGCAATCAACTATGCTTCCTCAAAGTGGTGCTTGGTTGAACTTAGCAAGATTCAGGAATGCAAGAAAAAGCAAGCACAAATTGTCATACCGGCTTTCTACAATATAGATCCATCCCATGTGAGGAAGCAAAATGGGAGTTATGAGCAAGCCTTTTCAAAACATGAGGAAGAACCTAGGTGCAACAAATGGAAAGCTGCTCTGACTGAA…	MAEQQIFSDFASSSNSSRKYGVFLSFRCEDTRKNFTSHLYEALMQKKIETYMDYQLEKGDEISPAINYASSKWCLVELSKIQECKKKQAQIVIPAFYNIDPSHVRKQNGSYEQAFSKHEEEPRCNKWKAALTEVTNLAGWDSRNSILSVSITFPVCLLANLHACMGGIGKTTLATALYVKLSHEFEGGCFLTNVREKSDKCGLEALRNELFPKYLIEDYDFLGPGSRVIVTTRNKQILTQVDQIYNTKELSFDHSLQLFRLTVFREKQPKHGYEDLSRSVISYCEGIPLALKALGASLRIRSKDIWESELRKLQMIPNSSQQGIFLDIACFFKGKGREWVASILEACNFFAASGIEVLLDKSLITISGCNKIEMHDLIQAMDQEIVRQESIKDPGRRNL…
HK_NBARC_NBARC.Chr11.11	Chr11	TGFam.PM	23166093	23180647	ATGGCTTTTGCAAGTGGAGATGCTACTCCACCATCTCCAAAAACCGCAAGGCTCATGGCGGAGATGATTAAACTTGGGACTTGTGATTCAGAAGTGTATCTTGAGTGGGAGATGAAGGTTGAGCAAGTCTTTGCTTGCTACAACTACAATGAAGAGAAAAAGATCAAATTGGCCTACTTGGAGTTTGAGGGATATGCCTTAGTGTGGTGGAATCAAGTGAGGAGTGATTTTGAGAGGATGAGAAGGCCTTTGATTAATACTTGGCAAGACATGAAGAGAGTTTTGAGAGAGAGATTTGTGCAGTCCTATTTTGGGAGAAACTTTCACAACAAGCTCCAAAGAATAATTCAAGGAAATAGGAGTGTGGATGAGGATATCATTAGTGCATCTTCTTCTAGC…	MAFASGDATPPSPKTARLMAEMIKLGTCDSEVYLEWEMKVEQVFACYNYNEEKKIKLAYLEFEGYALVWWNQVRSDFERMRRPLINTWQDMKRVLRERFVQSYFGRNFHNKLQRIIQGNRSVDEDIISASSSSSSSSSSESERECDVQPLEGVEELLKEFGDVFPKYTPHGLPLLKRIEHQIDLIPGASLPNKPTYRSNPEGTKEIQRQVESLMEKGWVRENLISCAMPIVLVNRTLSQLLMCLVGKNLKDWEQFPMLNFLIIGDWPSKANFVKSLQENGEAQIEKKIEEYARYSDKGGKKMVIKLGDWVWIHLRKNRFTSKRKSKLQEKGDDPFQVLKCINYNAYKIALPLDYGVSNTFNVTDLTLCGVGTCDINSKANSSQGRNDRGLSKEEEFGLD…
HK_NBARC_NBARC.Chr11.12	Chr11	TGFam.ISGAP	33873932	33875998	ATGACGCATTCCTATGTGACTGATTCAGATGTCACAGGAAGGGAACAAGACAAAGGAGAGATCATAAAGCTCTTGAATCAGCAAGATCCCAATGATGATTGTAATAGTCTCTATGTTATCCCCATTGTGGGAATGGAAGGCTTGGGAAAGTCCACTCTTGCAAAGTTTGTGTTCAATGATAAGAGGATTCATGAGTGTTTCCCTTTGAAGATGTGGGTGTGTGTTTCTGAAGACTTCGACATTAAGCAACTGGTTATTAAAATCATCAACTCTGCTAATGATTCTGCTTTTCTTGCTGATGCTCCTGATCCCCAACTGAATTTTAACATATTGGATATAGAGCAGCTGCAAAAGCAATTGAGAAACAAACTTGCTGGTCGAGAATTCTTACTTTTCTTG…	MTHSYVTDSDVTGREQDKGEIIKLLNQQDPNDDCNSLYVIPIVGMEGLGKSTLAKFVFNDKRIHECFPLKMWVCVSEDFDIKQLVIKIINSANDSAFLADAPDPQLNFNILDIEQLQKQLRNKLAGREFLLFLDDVDLIQIGANGSKILVTTHNHFVASMMGTVPSHILEGLPLEDSLWHLVKWAFKEKEEEEKYPHLINIGKEIVKKCSGIPFSVRTLGSLLFSKFEANEWEYVRNNEVWNFQPEKMTFYQHFKLQSLAYLISFIQDFVNYGISYLFKIHDLVHDLPLYLIKVKCLLVNFHIQSIPENVQHLSFVEEDLHGKSFTAKSILDLSDSTFETLPRFIGKLKHLRYLNLCNNKKIKRLPNSICKLQNLQILSLRGSMELEALSKGLKSLISL…
HK_NBARC_NBARC.Chr12.1	Chr12	TGFam.ISGAP	854561	857350	ATGGCGGACAGCGTGGTTTCCTTTGTTTTAGATCACTTGTCCCAGCTATTGGCACGTGAAGCTAAGTTGTTGTGTGGCGTGGAAGACAGGATCTTGTCCCTCCAAAATGAGCTCGAAATGATCAACGAGTTCCTCAACACCTCAAAGAGCAAGAAGGGGATCGAAAAAATAGTGGTGAGCCAAATCAGAGATGTGGCCCACTTAGCTGAGGATGTCATCGACACATTCCTTGCCAAAGTTGTTGTGCACAAGAGGAGAAGCATGTTGGGAAGGATGCTCCATGGCGTGGACCATGCAAAGTTGCTCCACGATCTATCCGAGAAAATAGACAAGATCAAAATCACCCTGAACGAGATACGCGACAACAAGATCAAATACGTCGAGTTCCAAGAAAGCAAC…	MADSVVSFVLDHLSQLLAREAKLLCGVEDRILSLQNELEMINEFLNTSKSKKGIEKIVVSQIRDVAHLAEDVIDTFLAKVVVHKRRSMLGRMLHGVDHAKLLHDLSEKIDKIKITLNEIRDNKIKYVEFQESNNQSTIKEEEKAESLHERRRNVEVENVVGFVHDSKVVIKQLVEGGSLRNAVSIIGMGGLGKTTLARKVYNSSQVKQYFGCRAWVYVSNECRVRELLLGLLEQLMPNPEYEYAGKKKGKKHTQDVSNLSEEELKKLVWKRLERKRYLVVLDDMWKRRDWDEVQDAFPDNNEGSRILITSRLKELASHTSHHPPYYLKFLNEEESWELFCRKVFRGEEYPFDLEPLGKQIVQSCRGLPLSIIVLAGLLANKEKSYKEWSKVVGHVNWYL…
HK_NBARC_NBARC.Chr12.2	Chr12	TGFam.ISGAP	1955385	1960290	ATGGCAAATGATGGTACAGTGTCTGAAACAAAGTGTACCCATGACGTATTCCTTAGTTTTAGGAGAGATGATACCCATCACACTTTTACTTGTAAACTCTATGATTCTTTGTGCCGGAAGGGAATTATCACCTTCATGGACAATGAGGAGCTCAAAGTTGGAGATCAAATTGGTCATAAGCTTCTAAAAGCCATTGAAGAATCAAGGATCTCGATTGTTGTTTTGTCTGAAAATTATGCAGCCTCTTCATGGTGCCTTGATGAACTTGTGAAGATCCACGAGTGTATGAAGGCAAAAAACCTGCTCGTTTGGCCCATCTTCTACAAAGTGGATCCCTCAGATGTGAGGCACCAGAATGGAAGTTATGGTGAGGCCATGACTGAGCATGAAACACGGTTT…	MANDGTVSETKCTHDVFLSFRRDDTHHTFTCKLYDSLCRKGIITFMDNEELKVGDQIGHKLLKAIEESRISIVVLSENYAASSWCLDELVKIHECMKAKNLLVWPIFYKVDPSDVRHQNGSYGEAMTEHETRFGKDSEKVHKWRLTLTDMTNLKGEHVQEGRDESKFIDDLVSRIFIKVSPKDLSRNEHIVGWEYRVEELKSLLELESHNITNCLLGIHGTGGIGKTTLVKALYDSIYKQFQGSCFLSNFRENSSQIQGIKHLQEGHLSEILEGSKILLKNIEKGIGTITSRLRLKRVVIVVDDVDDIEELKKLAEELDRFGPGSRIIITTRNKYLLDVGQVEKKYEVKMLNDQESLELFCQSAFRKSCPETNYEDLSNRAIRCCKGLPLALKVLGSHM…
HK_NBARC_NBARC.Chr12.3	Chr12	TGFam.AUG	6353029	6381497	ATGACCTCTAACAACACGAATACTCGCCAATTTGGAGTTGTAAAGTTCATAGCACAAGTAATACAAGGTCGATTGTTCATGCTTTGTGCCTCCTTCTTTATCATGGCAGGAGCAGGTGTCATCTATGTGTTTGGATCATACTCTGAAGAAATCAAATCTTCACAAGGTTATGACCAAAGCACGCTCAACTTTTTAGGGTTTTGCAAGGACCTTGGTTCAAATTTTGGTACCCCAGTTGGTCTCTTGGGAGAAGTTGTCCCTCCATGGTTGGTGATCCTGCTTGGCTCAGCCTTTGATTTTGGTGGCTATTTCATGATCTGGCTTGCGGTCACTGGCAGAATATCCAAACTCCACGTGTGGCAGGTTTGCATCTACATTGCCATCGGTTCTAGTTCCTTG…	MTSNNTNTRQFGVVKFIAQVIQGRLFMLCASFFIMAGAGVIYVFGSYSEEIKSSQGYDQSTLNFLGFCKDLGSNFGTPVGLLGEVVPPWLVILLGSAFDFGGYFMIWLAVTGRISKLHVWQVCIYIAIGSSSLSFANTGVITTSVKNFPESRGRILGLLKGYLGHSGAIMTQRQISFSKAAYIGCATLVCFVLIFPMFIAVRKEFLLWNMEKKVENISNEVVIEKLQVVEPRDEEAKISSFANIFNKPERGVDHTILQALLSIDMVQWQHSKIICVISKHLEFLRESLVWFCMCLKFYFTSTKFLALVGLFAFRAGGVYVFGSYSEAIKRSQGYDQSTLNFLGFCKDLGGNLGAPIGFIGEVTPPWLVLLIGSVLNFGGYFMIWLVVTGRISKPHVWQV…
HK_NBARC_NBARC.Chr12.4	Chr12	TGFam.PM	10777717	10788407	ATGAGAACCCTCAGGTCTTCTTCAACTGCTCTAGCCCATTCCTCTTGGAGCCTCTTGCTCATGGATTTGGTAACTGGTCCCTTCCTAGGAAGGATTGCATCACTTAGCAAGCATAAGTTACTAGGAAAAGATAGTGTTGACTCACTACAGTTTTGTGAACATTGTATTCTTGGCAAGGCAAAGAGGTTGGAGTTTGCCACTATTGTGCATCACTCCAAGGGTACACTTGAATGCATTTATAGTGATGTATGGGGGCCAACAAGAGTACCATCACACAATAGAGCAAGGTTCTTCCTTTCTATAGTTGATGGTTTCTCTAAGAAGGTATGGATCTATAGACTCAAGCAGAACAGTGAAGCCTTTGAGAAGTTCAAGGAATGGAAGGTGGAGTTAGTACAA…	MRTLRSSSTALAHSSWSLLLMDLVTGPFLGRIASLSKHKLLGKDSVDSLQFCEHCILGKAKRLEFATIVHHSKGTLECIYSDVWGPTRVPSHNRARFFLSIVDGFSKKVWIYRLKQNSEAFEKFKEWKVELVQEKPRPEIKVENQENELAPTQPDLQNYKLARDRERRVINPPLRFGFDDMVAFALKVAEEIETNDPRNYVEAINCNLSQNWIVVMYEEINSLQKKYTWVLVEKLKRTRLVSCKWIFKLMEEILGIEKSRFKARLVSRGFTQRERVDYSEDILTITQKSYIAKVLKKFSMEKSKLVATLMAQHFKLSHQNSPKSEEEANYMKNVSYANVIGSLMYVMRCTRPDLAYSVSLVSTYMGKPGKLHWEDLKWILRASMAAFASSTSITDHIDA…
HK_NBARC_NBARC.Chr12.5	Chr12	TGFam.PM	13813292	13816319	ATGGTTGAGTTTGTCCTCGAAACTTTGCTTGGGAATTTGAACTCACTTGTTCAAAAGGAGTTGCTACTATTTCTGGGTTTTGATCAAAACTTGGAAAAGCTTTCCAGCTTGTTGACTACAATCAAGGCAACACTTGAAGATGCTGAGGAGAAACAATTCTCAAACAGAGCTATAAAAGATTGGCTGGAAAAGCTAAAACATGCAGCTCACATCCTGGATGAAATCATTGACAAGTGTTCCTATGAAGGTTTGGGGTTGGAGTACCAAGGGGTCAAGTGTGGTCCATCAGACAAGCATGTTGTTTTCCGCTGCAAAATTGCTAAGAAAATAAAAAGAGTAAGTGATAGATTAATGGAAATTGTTGAAGAAAGGACTAAGTTTCATTTGACTAACATGGTT…	MVEFVLETLLGNLNSLVQKELLLFLGFDQNLEKLSSLLTTIKATLEDAEEKQFSNRAIKDWLEKLKHAAHILDEIIDKCSYEGLGLEYQGVKCGPSDKHVVFRCKIAKKIKRVSDRLMEIVEERTKFHLTNMVLGLGGLGKTTLVQFIFNQEKVVNHFELRIWVCVSGDFSLERMTKAIIEAASGRACKNLDLGSKRKRLQDILQRKRYLLVLDDIWDDNQENWKMLKSVLACGAKGACILVTTRQSKVATTMGTIPTHQLPVLPDKYCWELFKHQAFGLNEQEQVELEDIGKEIVQKCRGVPLAAKALGGTLRFKRNKNEWLNVKESNLLELSHNENSIIPVLRLSYLNLPIEHRQCFAYCAIFPKDENIGKQYLIELWMANGFISSDERLDAEDVGD…
HK_NBARC_NBARC.Chr12.6	Chr12	TGFam.PM	15003805	15007568	ATGGCTTGCTCTTCATCACACGCGAAGAATTTTGATGTGTTTGTGAGCTTTAGAGGTCTGGATACTCGTAATAGTTTCACTGATCATCTTTTTGCTGCTCTTCAAAGGAAAGGCATTGTTGCTTTCAGGGATAACCAAAATATCAACAAAGGGGAACTCTTGGAGCCTGAGCTCTTGCAGGCAATCGAAGGATCACATGTTTTCATTGTTGTCTTCTCAAAAGACTATGCATCATCCACATGGTGCTTGAAAGAGCTGAGAAAGATTTTTGATAGGGTTGAAGAAACAGGGCGAAGTGTACTCCCTATTTTCTATGATGTCACTCCTTCTGAGGTCCGGAAACAGAGTGGTAAGTTTGGAAAAGCTTTTGCTGAATACGAAGAAAGGTTCAAAGATGAT…	MACSSSHAKNFDVFVSFRGLDTRNSFTDHLFAALQRKGIVAFRDNQNINKGELLEPELLQAIEGSHVFIVVFSKDYASSTWCLKELRKIFDRVEETGRSVLPIFYDVTPSEVRKQSGKFGKAFAEYEERFKDDLEMVNKWRKALKAIGNRSGWDVQNKPEHEEIEKIVEEVMNLLGHNQIWSFSGDLVDMDSRVKQLEELLDLSANDVVRVVGIWGMSGVGKTTLVTALFGKISPQYDARCFIDDLNKYCGDFGATSAQKQLLCQALNQGNMEIHNLSHGTMLIRTRLRRLKTLIVLDNVDQVEQLENLALHPEYLGEGSRIIIISKNMHILKNYGVYKVYNVQLLKKDKALQLLCKKVFKSDDIEKGYEEVTYDVLKYANGLPLAIKVLGSFLFDRDV…
HK_NBARC_NBARC.Chr12.7	Chr12	TGFam.PM	15018732	15029237	ATGGCTTCCAACAGCATGGTCCCATGCAGCACTTCACCAGCGATGATAAAGAAATATGAAGTGTTTGTGAGCTTCAGAGGTAAGGACACACGCAACAATTTTACTGATCATCTTTTTGGTGCTCTCCAAAGGAAGGGCATTCTTACCTTTAGGGATGACACAAAGCTGAAGAAAGGGGAGCGTATACTCTCTAGCCTCATGCAAGCAATTGAGGGGTCTCAGATTTTTGTTATTGTGTTCTCAAAGAACTATGCTTCTTCAACATGGTGCTTGCGAGAACTTGAAAAGATTCTTGATTGTGTTAGAGTCCCCGGAAAACGTGTTCTTCCTATTTTTTATGATGTTGATCCATCTGAGGTTCGAAAACAAACGGGAGATTACGGGAAAGCCTTCACCAAA…	MASNSMVPCSTSPAMIKKYEVFVSFRGKDTRNNFTDHLFGALQRKGILTFRDDTKLKKGERILSSLMQAIEGSQIFVIVFSKNYASSTWCLRELEKILDCVRVPGKRVLPIFYDVDPSEVRKQTGDYGKAFTKHEERFKDDVEKMEEVKRWRRALTQVANFSGWDMMNKSQYDEIEKIVQEILSKLGRNFSSLPNDLVGMESPVEELEKLLLLDPVEDVRIVGIFGMGGIGKTTLASVLYHRISHQYDACCFIDNVSKVYRDCGPTGVAKQLLHQTLNEENLQICNLHNAANLIQSRLRYVKTLIVLDNVDEVKQQEKLVLNREWLGAGSRIVIISRDMHNLKEYGVTSVYKVQLLNGADSLKLFCKKAFNCDDIVGGYKELTYDVLKYANSLPLAIKV…
HK_NBARC_NBARC.Chr12.8	Chr12	TGFam.ISGAP	15035250	15038967	ATGGCTTGTATTAGAATCCAAAGAGGCTCTTCATCACACACGAAGAATTTTGATGTGTTTGTGAGCTTTAGAGGTCTGGATACTCGTAATAGTTTCACTGATCATCTTTTTGCTGCTCTTCAAAGGAAAGGCATTTTTGCTTTCAGGGATAACCAAAATATCAACAAAGGGGAACTCTTGGAGCCTGAGCTCTTGCAGGCAATCGAAGGATCACATGTTTTCATTGTTGTCTTCTCAAAAGACTATGCATCATCCACATGGTGCTTGAAAGAGCTGAGAAAGATTTTTGATGGGGTTGAAGAAACAGGGCGAAGTGTACTCCCTATTTTCTATGATGTCACTCCTTCTGAGGTCCGGAAACAGAGTGGAAAGTTTGGAAAAGCTTTTGCTGAACACGAA…	MACIRIQRGSSSHTKNFDVFVSFRGLDTRNSFTDHLFAALQRKGIFAFRDNQNINKGELLEPELLQAIEGSHVFIVVFSKDYASSTWCLKELRKIFDGVEETGRSVLPIFYDVTPSEVRKQSGKFGKAFAEHEERFKDELEMVKKWREALKAIGNRSGWDVQNKPEHEEIEKIVEEVMNLLGHNQIHSQIWSFSGDLVDMDSRVKQLEELLDLSTNDVVRVVGIWGMSGVGKTTLVTALFGKISPQYDARCFIDDLNKKCGNFGAISAQKQLLSLALHQGNMEIHNLSHGTMLIRTRLCHLKTLIVLDNVDQVEQLENLALHREYLGEGSRIIIISTNMHILRNYGVDGVYNVQLLNKDKALQLLCKKAFKSDDIVKGYEEVTHDVLKYVNGLPLAIKV…
HK_NBARC_NBARC.Chr12.9	Chr12	TGFam.ISGAP	15839437	15842893	ATGGTTTCTAAGGCCATCATCCAATGCAGCTCTTCTTCATCTCACGTGATGAGGACATATGATGTGTTTGTCAGCTTCCGCGGTGAAGACACGCGTAACAACATCACTTCGTTTCTCCTTGGAAGTCTCGAAAGCAAAGGCATCAATGTCTTCAAAGATAATGAAGATCTCAGGAAAGGCGAATCCATAGCACCCGAGCTGCTACAAGCCATTGAAGTGTCTCGCATTTTCGTTGTGGTCTTCTCAAAGAACTATGCTTCTTCAACTTGGTGCTTGCGTGAACTAACACATATCTGCAATTGCACTCAAACATCGCCAGGAAGTGTTCTGCCTATTTTTTATGATGTTGATCCATCAGACGTGCGAAAACTGAGTGGATCTTATGAGGAAGCCTTTGCC…	MVSKAIIQCSSSSSHVMRTYDVFVSFRGEDTRNNITSFLLGSLESKGINVFKDNEDLRKGESIAPELLQAIEVSRIFVVVFSKNYASSTWCLRELTHICNCTQTSPGSVLPIFYDVDPSDVRKLSGSYEEAFAKYKERFREDREKMKEVQTWREALKEVGELGGWDIRDKSQNAEIEKIVQTIIKKLGSKFSSLPKDNLVGMESRVEELVKCLRLGSVNDVRVVGISGMSGIGKTELARALYERISDQFDVHCLVDDVSKIYQDSGRLGVQKQLLSQCLNEKNLEIYDVSQGTCLAWKRLQNAKALVVFDEVVNERQLQMFTGNRDSLLRECLGGGSRIIIISRDEHILRTHGVDDVYQVPLLDREEAVQLFCKNAFKDNFIMSGYAEFADVILSQAQG…
HK_NBARC_NBARC.Chr12.10	Chr12	TGFam.PM	16139521	16143639	ATGAACTCATTTATGATTAGGACTGTGTCGTTTCAAATGGAGGATAGTGTTCTTTCCATCAGAGCAAAGATTGTAGAATATATTGTGGGTCCAATTTTACACCATGCAAAATACTTGTGTTGTTTCAACAACTTTGCTGTGAATCTCCCAAATGCCAAAAGAGAATTGGAATTGACCCTAGAGCAAGTGAAATTACGAGTAAGAGAAGCCACTATTAGGATTGAAAAAATTGAACCAACTGTTGAAGAATGGCTAGAAGAAGTTGAGAAAGTTTTAGCAGAAGTGCAGATTCTCGAAGGAAGAGTTTTGAAAGTGACAAAGAGTAGTTTCATAAGGCAATGTCGATATTTTCTTGCAAAAGAAATGGTAAGAAAAATAGGACAAATGAATCAGCTCAAA…	MNSFMIRTVSFQMEDSVLSIRAKIVEYIVGPILHHAKYLCCFNNFAVNLPNAKRELELTLEQVKLRVREATIRIEKIEPTVEEWLEEVEKVLAEVQILEGRVLKVTKSSFIRQCRYFLAKEMVRKIGQMNQLKCNKLEPFSRSINLPDMKYYSSKDFVLSNSTESTYNKLLETLKDKNVSIIGLVGIEGSGRTTLANEVGKKAEKLKLFEKVVMTTVSQNLNIISIQEQIADKLGFKLEEESEESRAKTLSQSLREGTTLLILDDVWEKLNFEDVGIPLNENNKSCVILLTTQSREICTSMQCQSIIELNRLTNEESWILFKLYANITDDSADALKSVAKNIVDECEGFLISIVTLGSTLKKKSLGDWKSALKRLQDSKPLVITKGLKIPHVCLQLSYD…
HK_NBARC_NBARC.Chr12.11	Chr12	TGFam.AUG	20142618	20146523	ATGGTTGACATTATATCTGATGCAAATCTCAAGGATGAAGGGAACATTGGCAAGAGTAAGACTACACTGAATTGGTCTGAGTCATTCAATGAAGATGATGATGAAGACCTTCAAGAGATAGAGGCCAATGAAGCTCTTTTGGCAAAGGTGAGGCAGAGCAAGGCAATCGAGAATAGATTGAATCAAAGTGGCCAACTATCCATTCTTGATAATCTTCACATAACAGGATTAAGTCCTAGCCACAAGAGGGTGTGGCTTCTACACTGCTTGGCCTTCTCCTATGAGCCTCAGGCTTCAATCTTCCAAGTGGGGAAAGGGTGCAGATTCTCTTATGTGTACATGGAAAGTGTCAATGATGAAATCTTCCTCTATTTAGAAGTGGAATCAGATCCACAAGTT…	MVDIISDANLKDEGNIGKSKTTLNWSESFNEDDDEDLQEIEANEALLAKVRQSKAIENRLNQSGQLSILDNLHITGLSPSHKRVWLLHCLAFSYEPQASIFQVGKGCRFSYVYMESVNDEIFLYLEVESDPQVAFIVVLGFRIGKTVLQCQVYISQHQTKRIGLIQALSHDLALLDSKLYTYCVVAIPDLVLILVFKMRMKGSSFASDGRGDERVMEYSATTSLEDGYGMYGRDIDKEGIMKLLSNDSSDGVLVCVIAIVGMGGVGKTTSTRSVFNNGNLKQMFDLIL*
HK_NBARC_NBARC.Chr12.12	Chr12	TGFam.ISGAP	29396209	29399019	ATGGCTTCCAAGACCACAATTCATTGCTGCTTCCGCGGTGAAGACACACGCAATAGCTTCACTGGTTTTCTTTTTCAAGCTCTTAGTAGAAAAGGCACCATTGATGCATTCAAAGATGGTAAAGATCTCAAGAAAGGCGAATCCATAGCGCCAGAGCTGATCCAAGCCATTCAAGGGTCTCGCCTTTTCTTCATTGTGGTGTTTTCAAACAACTATGCTTTCTCAACTATCCGAAAAAAGCTACAATATGCAGAGATTGAAGATCTTGAAAAGATAACAAATATACTGGGTCACAAATTTTCAAGTCTTCCAAATGATGATCTGGTTGGGATGGAATCTTGTGTTAAAGAATTAGCAAAGCTTTTACGTTTGGGGTCCGTTAATGACATTCAAGTTGTG…	MASKTTIHCCFRGEDTRNSFTGFLFQALSRKGTIDAFKDGKDLKKGESIAPELIQAIQGSRLFFIVVFSNNYAFSTIRKKLQYAEIEDLEKITNILGHKFSSLPNDDLVGMESCVKELAKLLRLGSVNDIQVVGMSGIGGIGKTTLGHGFYAMLARELIVLDNVDQVGLLKMFPRSRDTLLRECLGEGGRIIIISRDKHILMRHGVDDVYQVQALDHEHAVQLVCRNAFKSNYVMTDYKKLAYDILSHAQGHPLAMKYWAHLFIDFRGFHPKYGLQVLIDRSLITIKYELIHMRDLLRDLGRYIVREKSPKKPRKWSRLWDFKKISTKAADYLEAMMPDIGEALNLEWLDLQGRIQLRQIDPSIGLLRKLIFVNFKDCKSLTNYLLPSSPIFPCICKLD…
HK_NBARC_NBARC.Chr12.13	Chr12	TGFam.ISGAP	35388614	35395123	ATGATGAAAAACGTATCATGGTTTTGGACCCGGTTTGGCCGTGGATCATCCTCCAATTTCAGCACAGTAAGTATAGCATCCAGTTCTTCCAATGACTCCGTCGACAGTAGCATCCAAAACCAAAACTACAGATACGATGTATTTATCAGTTTCAGAGGTCCTGACACCCGCAACACTTTCGTTGATCATCTTTATGCCCATCTCCTCCGAAAGGGTATTTTCGTCTTTAAGGATGACAAAAAGCTCCAGAAAGGAGAATCCATATCAGCACAGCTTCTACAAGCAATTCAAGATTCACGCCTTTCAATCATTGTCTTTTCCAAACAATACGCTTCCTCCACATGGTGTTTAGACGAAATGGCCGCTATAGCTGATTGCAAACAACAATCAAACCAAACT…	MMKNVSWFWTRFGRGSSSNFSTVSIASSSSNDSVDSSIQNQNYRYDVFISFRGPDTRNTFVDHLYAHLLRKGIFVFKDDKKLQKGESISAQLLQAIQDSRLSIIVFSKQYASSTWCLDEMAAIADCKQQSNQTVFPVFYDVDPSHVRHQNGAYEVAFVSHRSRFREDPDKVDRWARAMTDLANSAGWDVMNKPEFREIENIVQEVIKTLGHKFSGFVDDLIGIQSRVQELEGSLKLSSNNDNVRVLGICGMGGIGKTTQAVVLYDRISYKFDACCFVENVNKIYRDGGATAIQKQIVRQTLDEKNLEIYSPFEISGIVRNRLHNIKVLIFLDNVDQIEQLQELAINPNFLFEGSRMIIITRDEHILKVYGAHVIHKVSLMNDNDARKLFYSKAFKSEDQ…
HK_NBARC_NBARC.Chr12.14	Chr12	TGFam.ISGAP	36039334	36042312	ATGGCTACTAGGATCATAGAAAGCTTGGTAAAAATCAGTGAAACATATTCTCTAATCTTTGATCTGCTCTACGGATTCAACAGCTTCAATGATAATGTACAAGTGCTAGAAATGAAACTAGAAGAGTTATGCAGCCTAGAATATGACATAAACAAAGAGCTTGAAATTGCAGAGCTACAGCAAGGCAAGAAAAGAAAACGAGAAGTTGAAAATTGGCAGAGAAATGTTCAAAGGAAGAAAATTGAAGTCTATGGCATAGTTCAGGAATTGAGGGACTGTGGAGTGTTTAAGCATCTAAAGTTAACTGCACAAGTAAAGAAACTAATAGGACAAGTGACAGATCTTGTGGAGTGTGGTAGGTTTCCTAAAGGAATTGTGGGGTGTGCACATGAATCTAGA…	MATRIIESLVKISETYSLIFDLLYGFNSFNDNVQVLEMKLEELCSLEYDINKELEIAELQQGKKRKREVENWQRNVQRKKIEVYGIVQELRDCGVFKHLKLTAQVKKLIGQVTDLVECGRFPKGIVGCAHESRGYALLTTKLAGAMFQKNVAKIWDWLMNDGELIIGVYGMGGVGKTSMLMHIHNMLLTRVTNFDSVFWVTLSQSFSIHKLQCDVAKIVGLDISKESDERKRAARLSWTLMRRKRCVLFLDDVWSYFPLEKVGIPVREGLKLVLTSRSLEVCRRMNCQNNVKVEPLAKEEAWTLFLDNLGQQTTLSPEVTKVARSVAKECAGLPLAIITMARSMRGVEEICEWRHALEELRNTEIRLEEMEMEVLRVLQFSYDHLNDNMLQKCFLCCAL…
HK_NBARC_NBARC.Chr12.15	Chr12	TGFam.ISGAP	37738657	37742292	ATGATTGTCCCTGTTGGTGCTCCAATTAACCATCAAACAAATAATGAATCAACAAGTTTATTCGAAGGTTGGGCACCAGAGCATGCTATTGTCGGAAGCAACAATTCGAATGGTATTTTCCAAAGTAAGATTAGTGTGATAAATGAGTTGGTTTCCGATCTATCAAGAGAGGAAGATGACATCAAGGAACAATTAGAATGGCTAGAATCTCGCGGCAAGAAGCGCAAGGGTGATGTTGATGACTGGATGGATGAACTACGAGACCTGAAGAAACATGTTGCTGATGTGGATTGGTTAGGGTTCACTAACTTTTATGCATCGGATTTGGTTGATAAATTGCGAAAGCATAAGATTGATAAGCCTCTGGTGTTGTCAAATGAATTTGTTGGTGAACAATTT…	MIVPVGAPINHQTNNESTSLFEGWAPEHAIVGSNNSNGIFQSKISVINELVSDLSREEDDIKEQLEWLESRGKKRKGDVDDWMDELRDLKKHVADVDWLGFTNFYASDLVDKLRKHKIDKPLVLSNEFVGEQFELNVGKMWKLLVDDQVFVIGINGMGGVGKTFLATYMENEIKRKGSFRHVFWVTVSHDFTTFKLQHQIAKKIGVKLDGDDERCRATILSSELEKIENSVLILDDVWRYIDLQKVGIPLKVNGKVNGIKLIMTSRLKHVCRQMDCLPDNTIQIYPLKKEEDEEEDWELFLLKLGHHGTPATLPPQVVEIARSVVRKCDGLPLAINVMARTMKGCYDTIMWKHELNKLENLEMGEEVKEEVFTVLKRSYDNLIEKDLQKYLLYFAQIPN…
HK_NBARC_NBARC.Chr12.16	Chr12	TGFam.PM	38019979	38024609	ATGTCGTCGTCGTCTTCTTCTTCATCCTTCTCAAAATCCAATCCTGGAAGGATGTACGATGTGTTCATCAATTTCAGGGGAGAAGACACCCGTAGGAATTTCGTTTGTCATCTCCATTCCGTCCTCTCAAATGCTGGGGTCAACACTTTCCTTGACGACGAGAATCTTGTCAAGGGAATGGAACTAATACAACTAATGCGGGCAATAGAAGGGTCTCAGATATCTTTGGTTGTTTTCTCCAAGAACTATACTCAATCTACATGGTGTCTTACTGAGCTTGAAAATATCATCAAATGCCACAGACTTCATGGCCACGTAGTTGTGCCCATATTTTACCATGTTTCCCCATCCGATGTACGTCGTCAGGAGGGTGATTTTGGAAAAGCTCTGAATGCATCT…	MSSSSSSSSFSKSNPGRMYDVFINFRGEDTRRNFVCHLHSVLSNAGVNTFLDDENLVKGMELIQLMRAIEGSQISLVVFSKNYTQSTWCLTELENIIKCHRLHGHVVVPIFYHVSPSDVRRQEGDFGKALNASAEKIYSEDKYVLSRWGSALTTAANFCGWDVMKPGNEAKLVKEIVDDVLKKLNGEVLSIPEFPVGLEPRGQEVIGFIKNQSTKVCMIGIWGMGGSGKTTIAKFIYNQIHSRFPGKSFIENIRKVCETDGRGHAHLQEQLLTDVLKTKVKIHSVGMGTSMIEKRLSGKEVLIVLDDVNEFDQLKDLCGNRKWIGLGSVIIITTRDRGLLNILNVDYVYKMEEMNENEALELFSWHAFRKAEPREEFNELARNVVAYCGGLPLALEVLG…
HK_NBARC_NBARC.Chr12.17	Chr12	TGFam.ISGAP	38059406	38065409	ATGGCAAATCTGAACCACGGTGCAACATTCAGAGATGATTTCTTCTACGATGTTTTTCTGAGTTTTAGAGGTGGGACCCGTTATGGGTTCACGAATCGTCTCTACAATGCTTTGCGGCAAAAGGGAATATACACTTTCAGAGATACTGAGGAGCTTAGGATTGGAGCAGACATCAGACCCGCGCTTCTGAAGGCAATAGAAAATTCAAGAATGTCAATGGTTGTGCTCTGTGAAGACTACGCGTCTTCTACTTGGTGTCTTGATGAACTTGCCAAGATCATTCAATGCTATCATGCAAATAAGCCCAAACAAGTTCTGCTCATATTTTACAAAGTTCAACCTTCTGATGTGTGGGACCAGAAAAATTCGTATGCAAAAGCCATGGCTGACCATGAAAAC…	MANLNHGATFRDDFFYDVFLSFRGGTRYGFTNRLYNALRQKGIYTFRDTEELRIGADIRPALLKAIENSRMSMVVLCEDYASSTWCLDELAKIIQCYHANKPKQVLLIFYKVQPSDVWDQKNSYAKAMADHENRFAKQPEKVKNWRKALSQLRHLTREYCKDDGYEAELIKKIVKDTSAKLPPIPLPIKHVVGLDSRFLDVKSMIHIESHDTVLILEIYGAGGIGKTTFALDIYNNIRHEFEAASFLANVREKSNKSTEGLEDLQKTLLSEMGEETEIIGASEIKRRLGHKKVLLVLDDVDSTKQLESLVGGGDWFGSRSRIIITTRDTTLLDEHVIDDVVIETYEMKALNYGDSLELFCWHAFNMSKPAENFEGVSNDAVRYAKGHPLALKVIGSNLK…
HK_NBARC_NBARC.Chr12.18	Chr12	TGFam.ISGAP	38070840	38076239	ATGTTCTCAGATTTCAGCTACGATGTTTTTCTAAGTTTTAGTGGTGGAACCAGCAACCCTTTTGTTGATCCTCTCTGTCGAGCTTTGCGTGACAAAGGAATCAGCATCTTCAGATCAGAAGATGGAGAAACTAGACCTGCCATTGAGGAAATTGAAAAATCCAAAATGGTAATCGTTGTGTTTTGTCAAAACTATGCATTTTCCACTGAGTCTCTTGATGAACTTGTCAAGATCCGAGAGTATGTTGACAATAGAAGAAAACAGGTTTGGACAATTTTTTACATAGTGGAACCATCAGATGTACGGAAACAAAGAAATTCTTACAAAGATGCCATGAATGGTCATGAAATGACATATGGAAAAGACTCGGAGAAGGTAAAAGCATGGAGGGAAGCTTTG…	MFSDFSYDVFLSFSGGTSNPFVDPLCRALRDKGISIFRSEDGETRPAIEEIEKSKMVIVVFCQNYAFSTESLDELVKIREYVDNRRKQVWTIFYIVEPSDVRKQRNSYKDAMNGHEMTYGKDSEKVKAWREALTRVCDLSGIHCKDHMFEAELQKIVEAASCKLFRVPGQMNHAVGLDDHFEQVKAFIDVESNDKVGVLGIYGGGGIGKTTFAVYLYEKIRHYYFEAASFLIKVREQSKESKNHLEDLQNRLLSQLGVDTGTMIGSTNKGELEIKHRLGHRRVLLVLDDVDSKEQLELLAGKHDWFGSGSRIIITTRDEAVLDYGVKVKKYKMTELNDRHSLELFCQNAFDKPEPAKNFESISHRAIGYAKGVPLALQVIGSNLKGRSIEEWEIELGKY…
HK_NBARC_NBARC.Chr12.19	Chr12	TGFam.ISGAP	38097438	38100956	ATGATAAAGCAGCCAACACCATCCTTGTGTTCCTTCACATGTGGATGGACTTATGATGTGTTCCTCAGTTTTAGTGGCATAGATACTCGCCATAGTTTCACGGACAATCTCTACAATTCTCTTAAACAAAGGGGAATCCATGCTTTCATTGACGATGAAGGGCTTAGAAGAGGGGAGGAAATTACACCAACTCTTCTCAAAGCCATCCGAGAATCTAGGATCGGCATCATTGTTTTCTCCAAGAGCTATGCATCCTCAACATATTGTTTGGATGAACTTGTTGAGATCCTTGAGTGCTTAAAGGTTGAAGGTCGATTGGTTTGGCCGGTTTTTTATGATGTGGATCCGTCACAAGTTCGGTATCAGACTGGGACTTATGCAGAAGCTTTGGCAAAGCAT…	MIKQPTPSLCSFTCGWTYDVFLSFSGIDTRHSFTDNLYNSLKQRGIHAFIDDEGLRRGEEITPTLLKAIRESRIGIIVFSKSYASSTYCLDELVEILECLKVEGRLVWPVFYDVDPSQVRYQTGTYAEALAKHKERFQDDKGKVQKWRKALHEAANLSGWHFQHGSESEYKFIKKIVDEASKKINRTPLHVADNPVGLESSVLEVMSLLGSGSEVSMVGIYGIGGIGKTTVARAAYNMIADQFEGLCFLADIREKAISKHRLVQLQETLLSDILGEKDIKVGDVSRGIPIIERRLRKKKVLLILDDVDKLVQLQVLAGGYCWFGSGSKIIITTRDKKLLATHGVVKLHEVKQLNDEKAFELFSWHAFKRNKFDPSYVDILNRAVFYACGLPLALEVIGS…
HK_NBARC_NBARC.Chr13.1	Chr13	TGFam.AUG	4168907	4180271	ATGGCTGAGAAAATGATCAATGTTGTTGCTTCTTCCTCTGGATCTGCTTCTAAGGTATTCCCTAAAAAATATGACGTTTTTCTAAGCTTTCGAGGTGAGGACACCCGAAGGAACTTCACATGCCATCTTTACGAAGCTTTGATGCAAAAGAAAATTAAAACCTATATAGATGAACAACTTGAAAAGGGAGATCAAATCGCACTAGCACTCACCAAAGCCATCGAAGATTCTTGTATATCTATTGTCATCTTCTCAGATAACTATGCTTCCTCAAAGTGGTGCTTGGGTGAACTCTTCAAGATCTTGGAATGCAAGAAAGAAAAAGGACAGATTGTGATACCAGTGAATGATGTTGAATTGCTTAAGGACATTGTTAGAGCTGTTTCGGAAAAATTGCCT…	MAEKMINVVASSSGSASKVFPKKYDVFLSFRGEDTRRNFTCHLYEALMQKKIKTYIDEQLEKGDQIALALTKAIEDSCISIVIFSDNYASSKWCLGELFKILECKKEKGQIVIPVNDVELLKDIVRAVSEKLPRRYQNQSKGLVGIEEHYKRIESFLNNGSSEVRTLGIWGMGGIGKSTLATALYNELSPEFEGHCFFINVFDKSEMSNLQGKRVFIVLDDVATSEQLEKLIGEYDFLGLGSRVIVTSRNKQMLSLVDEIYSVEELSSHHSLQLFCLTVFGEEQPKDGYEDLSRRVIFYCKGIPLALKILGKSLRQKCKDAWESELRKIQKILNVEIHNELKLSYYDLDCSQKEIFLDLACFFKGGKRDWVAGLLEAFGFFPASEIEVLLDKSLIRISK…
HK_NBARC_NBARC.Chr13.2	Chr13	TGFam.ISGAP	17672405	17676115	ATGGCCTTAGCTATGGTGGGAGAGGCACTTATCTCTGCTTCTGTTGAGATCTTAATAAAAAAGATAGCTTCAAGAGAGTTTCGAGATTTCTTCTCCAGCAGAAAGCTGAATGTTTATGTGTTGGATGAGTTGAAGATGAAGTTGTTGGCACTTAATGCTGTTCTTAATGATGCTGAAGAGAAGCAGATCACTGATCCTGTAGTGAAGGAATGGCTTGAAGAATTGAAAGATGCTGTCTTGGATGCAGAGGATTTGTTGGATGAAATCAACACAGATGCTTTGAGATGCGAGGTGGAGGGAGAATCTAAAACATTTGCTAACAAGGTCAGATCAGTGTTTTCTTCTAGCTTTAAAAATTTCTATAAGAGCATGAATTCCAAGCTTGAAGCAATTTCCGAA…	MALAMVGEALISASVEILIKKIASREFRDFFSSRKLNVYVLDELKMKLLALNAVLNDAEEKQITDPVVKEWLEELKDAVLDAEDLLDEINTDALRCEVEGESKTFANKVRSVFSSSFKNFYKSMNSKLEAISERLEHFVRQKDILGLQSVTRRVSYRTVTDSLVESVVVAREDDKEKLLSMLLYDDDAMSNDIEVITVLGMGGLGKTTLVQSLYNVSEVQKHFDLTAWAWVSDDFDILKVTKKIVESLTLKDCHITNLDVLRVELKNNLRDKKFLLVLDDLWNEKYNDWHHLIAPFSSGKKGSKIIVTTRQQKVAQVTHTFPIYELKPLSDENCWHILARHAFGNEGYDKYSSLEGIGRKIARKCNGLPLAAKTLGGLLRSNVDVGEWNRILNSNLWAH…
HK_NBARC_NBARC.Chr13.3	Chr13	TGFam.PM	17701718	17704917	ATGATATTTGAGGCTGGTTTTGGTTTGGCACTTAAAGTGGAATTAATGACTGCAAATTGTGAAGTCAACGTTGTAGATGAGGGTCGAAGACATCAAAATGGAGGACAACTTGATGCTCTTCGTGTTGAGTTGAAGAACAACTTGAAAGATAAAAAGTTTTTGCTTGTGCTCGATGACCTTTGGAATGAGAAGTATAATGATTGGCATCACCTAATAGCACCTTTTAGCAGTGGGAAAAAGGGAAGTAAGATTATTGTGACAACTCGACAACAGAAAGTTGCACAAATGACACATACATATCCCATTTATGAGCTGAAACATCTAACAGATGAAAATTGTTGGTGTATACTTGCTGAACATGCTTTTGGAAATGAAGGTTACAATGAATATCCAATCCTA…	MIFEAGFGLALKVELMTANCEVNVVDEGRRHQNGGQLDALRVELKNNLKDKKFLLVLDDLWNEKYNDWHHLIAPFSSGKKGSKIIVTTRQQKVAQMTHTYPIYELKHLTDENCWCILAEHAFGNEGYNEYPILEETGKKIAKKCNGLPLAAKTLGGLLRSNVDEKEWDRILNSNLWAHEEVLPALHISYLHLPAHLKRCFAYCSIFPKQHLLDRKELILLWMAEGFLQQIHGEKAMESVGDEYFNELLSRSLIEKDNTKAEEKFRMHDLIYDLAKLIYGKSCCCFESGEISGTVRHLAFHSNLYDVSKRFEGLYEQKFLRTFLAARNYLYGEYCVTKKVSHDWLQKLRYLRTLSLLKYENITELPESVSILVLLRYLDLSYTSIKRLPDATCRLYNLLT…
HK_NBARC_NBARC.Chr13.4	Chr13	TGFam.ISGAP	18357637	18361802	ATGGATGAGCAGAATATGATAAGGGCTGTTGCTTCTTCCTCTAACTCTTCTTCTATGGTATCTTCTAAAAAATATGATGTTTTTCTAAGCTTTCGAGGCGAGGACACTCGTAAGAACTTCACAAGCCATCTTTATGAAGCTTTGAAGCAAAAGAAGATTGAAACCTATATAGACTACCGCCTTGAAAAGGGAGATGAAATCTCGGCAGCGCTCATCAAAGCCATCGAAGATTCTCATGTATCTGTTGTCATCTTCTCAGAGAACTATGCTTCCTCAAAGTGGTGCTTGGGTGAACTGGGCAAGATTATGGAATGCAAGAAAGAAAGAGGACAGATTGTGATACCAGTATTCTATAATATTGATCCATCCCATGTGAGGAAGCAAACTGGGAGCTACGAG…	MDEQNMIRAVASSSNSSSMVSSKKYDVFLSFRGEDTRKNFTSHLYEALKQKKIETYIDYRLEKGDEISAALIKAIEDSHVSVVIFSENYASSKWCLGELGKIMECKKERGQIVIPVFYNIDPSHVRKQTGSYEQSFAKHTGEPRCSKWKAALTEAANLAAWDSQIYRTESEFLKDIVKDVLRKLAPRYPNHRKELVGVEENYEKIESLLKIGSSKVRILGIWGMGGIGKTTLASALYDKLSPEFEGCCFLANVREESDKHGFKALRNKLFSELLENENLCFDASSFLVSHFVLSRLGRKKVFIVLDDVDTSEQLENLIEDFDFLGLGSRVIVTTRNKQIFSQVDKIYKVKELSIHHSLKLFCLSVFREKQPKHGYEDLSRSAISYCKGIPLALKVLGAS…
HK_NBARC_NBARC.Chr13.5	Chr13	TGFam.PM	18736298	18739177	ATGGAATGCAAGAAACAAGGAGAAGACATTCATGTTATTCCTGCGTTCTACAAAATAGACCCATCTCAGGTACGCAAACAGAGTGGCAGTTATCATGCGGCATTCGCAAAACACGAGAAGGATAGGAAGGTGAGTGAAGAGAAGATGCAAAAGTGGAAGAACGCTCTCTATGAAGCAACCAATTTATCTGGCTTCCATTCTAACGCATACAGGACTGAATCTGACATGATTGAAGAAATTGCCAGAGTTGTTTTGCAAAAACTAAATCACAAAAACTACCCAAATGACTTCAGAGGTCATTTCATATCAGATGAAAACTGTTCGAACATTGAATCTTTACTGAAAATTGAGTCAGAGGAAGTTCGAGTCATTGGAATTTGGGGCATAGGGGGTATTGGT…	MECKKQGEDIHVIPAFYKIDPSQVRKQSGSYHAAFAKHEKDRKVSEEKMQKWKNALYEATNLSGFHSNAYRTESDMIEEIARVVLQKLNHKNYPNDFRGHFISDENCSNIESLLKIESEEVRVIGIWGIGGIGKTTLAAAIFHKVSSHYEDTCFSENMAEETKRHGLNYVYNKLLSKLLKKDLHIDTPKVIPYIVKRRLMNKKVLVVTDDVNTSEGSRVIVTTRDKHVLMGEVVDKIHQVKKMNFQNSLELFSINAFGKTYPKKGYEELSKRAVEYAGNFSADIGTRSLLDKALISITSDGDHVDMHDLIQQMGREVVRQESIENPGQRSRLWNPEEVYDVLTNNRGNGAVEGICLDMTQITYMNLSSNAFRKMSNLRLLAFKSYQDFEIINSVYLPKG…
HK_NBARC_NBARC.Chr13.6	Chr13	TGFam.ISGAP	21046223	21051138	ATGGAAGAGTCGCTGAACTCGGTTTTTGGTCAAGGGAGGGTTGCAGAAAATCAAACCATGAAGGTAGAAGCTCATGGTGAAGATGGTTCCAAATTCGCATTGGGAAGCAATGAAAAACCAGTGTTTGGACGAGGTTGCGGATTCGGCAACCACGACTGCACAGTGTCTTGTTGCCACGTGCCCTTCGAACTCGACCATTCAGACTCAGAGGATGCTAATGTTGTTTCATTTGAAGTCATGAAGGAGAACCCCTTTTGGGTGTACGACAGAGAAGCGCTTCGGCTCTTTAGAAAGTTCGACAAAGGTCACTTGCAATTCAGACACATTTTATTGGGTAATGTTGATGTCTTAATGGCCGCACACTTGGGTGTTATTTTTATGCCACAAGGTCTGGGGCAT…	MEESLNSVFGQGRVAENQTMKVEAHGEDGSKFALGSNEKPVFGRGCGFGNHDCTVSCCHVPFELDHSDSEDANVVSFEVMKENPFWVYDREALRLFRKFDKGHLQFRHILLGNVDVLMAAHLGVIFMPQGLGHFLGIDTFYPGGYLKGLERRKEIIDHQSAWRRVVCLAINSGISTPGCKFLVVSRPKFQTVLSYEMELLIEEDALSLFCHHAFGQKSIPLAANENSVKQVVTECGRLPLALKVIGASLRDQTEMFWLSVKNRLSQGQSIGESHEINLIDRMAISINYLPEKIKECYLDLCCFPKDKKIPLDVLINMWVEIHEARAAGTYSSCFEISVTQHDELRDLALNLRNHESIDERRLLVMPKKENGMPKEWLRYRQKPFEAQIVSIHTGEMKEM…
HK_NBARC_NBARC.Chr13.7	Chr13	TGFam.AUG	24086333	24090901	ATGATCAGTTACCTGATTTGTAGTTTACTGAGGCTTGTTCTTGAAGTAATTTGGAGGATAGCCAACAAGTTTGCAACACTTGTCTTTTTTATGACCCATCAAGTTGTAATGAGCACATTGAGGTCTCTCTTTCTTAGCATTTCTACTCTTAGCATTAGTAGGGTTCTTGGTTATAGAGTTGATAGTGAAGGCCATAGTATAATTATTAAAATCATCAGTTCTGCTTTGGCTTCAGCTCCAACTAGTGCTCTTGCTAACCAAGAAAATGTTAACAGCTTAGATATTAAGCAGTTACAAATTTATCTTAGACACAAGCTTTCTGGTCAGAAGTATTTACTAGAGATGGATGCTATATGGAATGATGACAGTGCAAAATGGATAGAGTTGAAAGATTTAATA…	MISYLICSLLRLVLEVIWRIANKFATLVFFMTHQVVMSTLRSLFLSISTLSISRVLGYRVDSEGHSIIIKIISSALASAPTSALANQENVNSLDIKQLQIYLRHKLSGQKYLLEMDAIWNDDSAKWIELKDLIKVGGMGSKILVTIRSNSIASMMGTLPSYILLSYDQMPSYLKHYFAYSSLFPKDFGFAGAQISSLWAGLGLLRSPVGSRQVEHIAAQYIDELHTRSFLEDFEDFGHIYYFKLHDLALYVAKEDLLVVNLRTCNIPEQARHLSVVENDSLNHALFPRSRSLETLPKGLGMLISHQHLHLTTKQSILFLPKLKVLSVRHCKMLNLSLNCESAIHKLRMKFLHLEHCPRQQTLPQWILGAADTLQTLLIINSHSLKMVPEWLTTMTHLKM…
HK_NBARC_NBARC.Chr13.8	Chr13	TGFam.PM	24097483	24098401	ATGTGGGTGTGTATCTCTGATTACTTTGATAAGAGGCAGATAATTATTAAAATCATCAGTTCTGCTTTGGCTTCAGCTCCAACTAGTGCTCTTGCTAACCAAGAAAATGTTAACAGCTTAGATATTAAGCAGTTACAAATTTATCTTAGACACAAGCTTTCTGGTCAGAAGTATTTACTAGAGATGGATGCTATATGGAATGATGACAGTGCAAAATGGATAGAGTTGAAAGATTTAATAAAAGTTGGTGGAATGGGAAGCAAAATCTTGGTGACAACAAGAAGTAACTCAATTGCTTCAATGATGGGCACTTTGAGCTATGATCAAATGCCATCCTATTTGAAGCACTGTTTTGCTTACTCTTCCCTTTTCCCTACAGATTTTGGCTTTGCTGGTGCT…	MWVCISDYFDKRQIIIKIISSALASAPTSALANQENVNSLDIKQLQIYLRHKLSGQKYLLEMDAIWNDDSAKWIELKDLIKVGGMGSKILVTTRSNSIASMMGTLSYDQMPSYLKHCFAYSSLFPTDFGFAGAQISSLWAGLGLLRSPVGSRQVEHIAAQYIDELHSRSFLEDFEDFGHIYYFKLHDLVHDLALYVAKEDLLVVNLRTCNIPEQARHLSVVENDSLNHALFPRSRSVRTILSCLEFKSLPQTF*
HK_NBARC_NBARC.Chr13.9	Chr13	TGFam.ISGAP	30650387	30653179	ATGCCAGTACTCGAAACCCTTGGTGGTGCTCTTTTTGGTGCTGTCCTTCAGGTGCTGTTTGACAAGCTGGATTCTCATCAAGTTTTGGATTACTTTCGTGGAAGAAAGCTCAATGAGAAGCTGCTGAAAAAGTTGAAGAGGAAGCTGGTGTCCGTCAATGCTGTGGTTGATGATGCAGAACAAAAGCAGTTCACTGATGCATATGTGAAAGCATGGCTTGATGACGTCAGAGACGTGTTGCTTGATACCGAGGATCTGTTGGATGAAATAGACTGCGAATTCTCCAAAACTGAGTTGGAAGCTGAATCCCAGACCAGTGCTAGCAAGGTATGCGATTTTGAATCAAGGATCATAGATGTCCTTGATGACCTAGATTCTCTTTTAGACCAAAAGAATGAT…	MPVLETLGGALFGAVLQVLFDKLDSHQVLDYFRGRKLNEKLLKKLKRKLVSVNAVVDDAEQKQFTDAYVKAWLDDVRDVLLDTEDLLDEIDCEFSKTELEAESQTSASKVCDFESRIIDVLDDLDSLLDQKNDLGLKNVSHVGVGSGSGSKVSQKLPSTSLVAVESVIYGRDDDKDIILNWLTSDTDNDDKISIFSIVGMGGMGKTTLAQHVYNNPRIEEARFDIKVWVCVSDDFDVLMLSKTILDKITESKHDSGGDLEMVHGRLKEKLLENKYLLVLDDVWNEDLTKWKALQTPLGYGAKGSKILVTTRSNKVASIMQSNDVRELMQLREDHSRQVFAQHAFQDDYPELNAELKDIGKKIVEKCQGLPLALETVGCLLHKKPSVSQWVGVLECKLWE…
HK_NBARC_NBARC.Chr13.10	Chr13	TGFam.ISGAP	30664327	30668046	ATGGCACTAGAATTGGTTGGTGGTGCTCTTCTTTCTGCTTTCCTTCAGGTTGCATTTGAGAAGCTTGCTTCTCATCTAGTTCGGGACTTCTTTCGTGGAAGAAAGCTTGATCAAAAGCTGCTCAACAACTTGGAAATCAAGCTGAACTCCATACAGGCTCTGGCTAATGATGCAGAACTAAAGCAGTTCAGAGATCCACTTGTCAGAAACTGGCTTCTTAAGGTCAAAGATGCTGTGTTTGACGCAGAGGATATCTTGGATGAAATACAACATGAGATCTCCAAATGCCAGGTCGAAGCTGAAGCTGAAGCTGAGTCTCAAACCTGCACTTGCAAGGTACCAAATTTCTTCAAATCTTCTCCTGCTAGTTCCTTTAACAGGGAAATTAAATCCAGGATG…	MALELVGGALLSAFLQVAFEKLASHLVRDFFRGRKLDQKLLNNLEIKLNSIQALANDAELKQFRDPLVRNWLLKVKDAVFDAEDILDEIQHEISKCQVEAEAEAESQTCTCKVPNFFKSSPASSFNREIKSRMEEILDRLELLSSQKDDLGLKNASGVGVGSELGSAVPQISQSTSSVVESDIYGRDEDKKMIFDWLTSDNGHPNQPSILSIVGMGGMGKTTLAQLVFNDPRIEEARFDVKAWVCVSDDFDAFRVTRTILEAITKSTDDSRDLEMVHGRLKEKLTGKRFLLVLDDVWNENRLKWEAVLKHLVFGAQGSRIIATTRSKEVASTMRSKEHLLEQLQEDHCWKLFAKHAFQDDNIQPNPDCKEIGMKIVEKCKGLPLALKTMGSLLHNKSSV…
HK_NBARC_NBARC.Chr13.11	Chr13	TGFam.ISGAP	30953068	30956637	ATGCCAGTACTAGAAACCCTTGGTGGTGCTCTTTTTGGTGCTGTCCTTCAGGTGCTGTTTGACAAGCTGGATTCTCATCAAGTTTTGGATTACTTTCGTGGAAGAAAGCTCGATGGGAGGCTGCTGAAAACGTTGAAGTGGAAGCTGATGTCTGTCAATGCTGTGGTTGATGATGCAGAACAAAAGCAGTTCACTGATAAAAATGTGAAAGAATGGCTTGATGAGGTCAGAGACGTGTTGCTTAATACCGAGGATCTGTTGGAGGAAATAGACTACGAATTCACCAAAACTGAGTTGAAAGCTGAATCCCAGACCAGTGCTAGCAAGGTATGCAATTTTGAATCAATGATCAAAGATGTCCTTGATGAACTAGATTCTCTTTTAAATGTAAAGGATACT…	MPVLETLGGALFGAVLQVLFDKLDSHQVLDYFRGRKLDGRLLKTLKWKLMSVNAVVDDAEQKQFTDKNVKEWLDEVRDVLLNTEDLLEEIDYEFTKTELKAESQTSASKVCNFESMIKDVLDELDSLLNVKDTLRLKNVGGDGFGSGSGSKVSQKLPSTSLVVESVFYGRDDDKDMILNWLTSDTDNHNKISILSIVGMGGMGKTTLAQHVYNNPRIEEAKFDIKVWICVSDDFDVLMLSKTILNKITKSKDDSGDDLEMVHGRLKEKLSGNKYLFVLDDVWNEDRDQWKALQTPLKYGAKGSKILVTTRSNKVASTMQSNKVHELKQLQEDHSWQVFAQHAFQDDYPKLNAELKEIGIKIIEKCQGLPLALETVGCLLHKKPSISQWEGVLKSKIWEL…
HK_NBARC_NBARC.Chr13.12	Chr13	TGFam.PM	30982833	30986390	ATGCCAGTACTAGAAACCCTTGGTGGTGCTCTTTTTGGTGCTGTCCTTCAGGTGCTGTTTGACAAGCTGGATTCTCATCAAGTTTTGGATTACTTTCTTGGAAGAAAGCTCGATGGGAGGCTGCTGAAAAAGTTGAAGAGGAAGCTGGTGTCCGTCAATGCTGTGGTTGATGATGCAGAACAAAAGCAGTTCACTGATGCATATGTGAAAGCATGGCTTGATGACGTCAGAGACGTGTTGCTTGATACCGAGGATCTGTTGGAGGAAATAGACTACGAATTCTCCAAAACTGAGTTGGAAGCTGAATCCCAGACCAGTGCAAGCAAGGTATGCATTTTTGAATCAATGATCAAAGGTGTCCTTGATGAACTAGATTCTCTTTTAGACCAAAAGGATGAT…	MPVLETLGGALFGAVLQVLFDKLDSHQVLDYFLGRKLDGRLLKKLKRKLVSVNAVVDDAEQKQFTDAYVKAWLDDVRDVLLDTEDLLEEIDYEFSKTELEAESQTSASKVCIFESMIKGVLDELDSLLDQKDDLGLNNVSGVGVGSGSGSKVSQKLSSTSLVVESVIYGRDDDKATILNWLTSDTDNHNKLSILSIVGMGGMGKTTLAQHVYNNPRIQEAKFDIKVWVCVSDDFDVLMLSKTILNKITKSKDDSGDDLEMVHGRLKEKLSGKKYLLVLDDVWNEDRDQWKALQTPLKYGAKGSKILVTTRSNKVASIMQSNKVHELKKLQEDHSWQVFAQHAFQDDCPKLNAELKEIGIKIVKKCQGLPLALETVGCLLHKKPSVSQWEGVLKSKMWEL…
HK_NBARC_NBARC.Chr13.13	Chr13	TGFam.ISGAP	30993460	30997020	ATGCCAGTACTAGAAACCCTTGGTGGTGCTCTTTTTGGTGCTGTCCTTCAGGTGCTGTTTGACAAGCTGGATTCTCATCAAGTTTTGGATTACTTTCTTGGAAGAAAGCTCGATGGGAGGCTGCTGAAAAAGTTGAAGAGGAAGCTGGTGTCCGTCAATGCTGTGGTTGATGATGCAGAACAAAAGCAGTTCACTGATGCATATGTGAAAGCATGGCTTGATGACGTCAGAGACGTGTTGCTTGATACCGAGGATCTGTTGGATGAAATAGACTGCGAATTCTCCAAAACTGAGTTGGAAGCTGAATCCCAGACCAGTGCTAGCAAGGTATGCGATTTTGAATCAAGGATCATAGATGTCCTTGATGACCTAGATTCTCTTTTAGACCAAAAGAATGAT…	MPVLETLGGALFGAVLQVLFDKLDSHQVLDYFLGRKLDGRLLKKLKRKLVSVNAVVDDAEQKQFTDAYVKAWLDDVRDVLLDTEDLLDEIDCEFSKTELEAESQTSASKVCDFESRIIDVLDDLDSLLDQKNDLGLKNVTDVGVGSGSGSKVSQKLPSTSLVVESIIYGRDDDKEIILNWLTSDTDNHNKISILSIVGMGGMGKTTLAQHVYNNPRIQEVKFDIKVWVCVSDDFDVLMLTKTILNKITKSKEDSGDDLEMVHGRLKEKLSGNKYLLVLDDVWNEDRDQWKALQTPLKYGAKGSKILVTTRSNKVASIMQSNKVHELKQLQEDHSWQVFAQHAFQDDYPKLNEQLKEIGIKIVEKCQGLPLALETVGCLLHTKPSVSQWEGVLKSKIWEL…
HK_NBARC_NBARC.Chr13.14	Chr13	TGFam.ISGAP	31134008	31137793	ATGGCACTAGAATTGGTCGGTGGTGCTCTTCTTTCTGCTTTCCTTCAGGTTGCGTTTGAGAAGCTTGCTTCTCCTCAAGTTCTGGACTTCTTTCGTGGAAGAAAGCTTGATCAAAAGCTGCTCAACAACTTGGAAACCAAGCTGAACTCCATACAGGCTCTGGCTGATGATGCAGAACTAAAGCAGTTCCGAGATGAACGTGTCAGGGACTGGCTTCTTAAGGTCAAAGATGCTGTGTTTGACGCAGAGGATCTCTTGGATGAAATACAACATGAGATCTCCAAATGCCAAGTCGAAGCTGAATCTCAAACCTGCTCTGGCTGCACTTGCAAGGTACCAAATTTCTTCAAATCTTCTCCTGTTAGTTCCTTTAACAGGGAAATTAAATCAAGGATGGAA…	MALELVGGALLSAFLQVAFEKLASPQVLDFFRGRKLDQKLLNNLETKLNSIQALADDAELKQFRDERVRDWLLKVKDAVFDAEDLLDEIQHEISKCQVEAESQTCSGCTCKVPNFFKSSPVSSFNREIKSRMEQVLEDLENLASQSGYLGLKNASGVGSGGAVSQQSQSTSLLVESVIYGRDDDKEMIFNWLTSDIDNCNKLSILSIVGMGGLAWVCVSDEFDVFNVTRTILEAVTKSTDDSRNREMVQGRLREKLTGKRFFLVLDDVWNRNQKEWKDLQTPLNDGASGSKIVITTRDKKVASVVGSNKTHCLELLQDDHCWRLFTKHAFRDDSHQPNPDFKEIGTKIVEKCKGLPLALTTIGSLLHQKSSISEWEGILKSEIWEFSEEDSSIIPALAL…
HK_NBARC_NBARC.Chr13.15	Chr13	TGFam.AUG	31164718	31168326	ATGGCACTAGAATTGGTTGGTGGTGCTCTTCTTTCTGCTTTCCTTCAGGTTGCGTTTGAGAAGCTTGCTTCTCCTCAAGTTCGGGACTTCTTTCGTGGAAGAAAGCTTGATCAAAAGCTGCTCAACAACTTGGAAATCAAGCTGAACTCCATACAGGCTCTGGCTGATGATGCAGAACTAAAGCAGTTCAGAGATCCACTTGTCAGAAACTGGCTTCTTAAGGTCAAAGATGCTGTGTTTGACGCAGAGGATATCTTGGATGAAATACAACATGAGATCTCCAAATGCCAGGTCGAAGTTGAAGCTGAAGCTGAGTCTCAAACCTGCACTTGCAACGTACCAAATTTCTTCAAATCTTCTCCTGCTAGTTCCTTTAACAGGGAAATTAAATCAAGGATA…	MALELVGGALLSAFLQVAFEKLASPQVRDFFRGRKLDQKLLNNLEIKLNSIQALADDAELKQFRDPLVRNWLLKVKDAVFDAEDILDEIQHEISKCQVEVEAEAESQTCTCNVPNFFKSSPASSFNREIKSRIEQVLENLENLARQSGYLGLKNASGVGSGFGGAVSQQSQSTSLLVESVIYGRDDDKEMIVNWLTSDIDNCSELSILSIVGMGGLGKTKLAQHVFNDPRIENKFDIKAWVCVSDEFDVFNVTRTILVEVTKSTDDSRNREMVQERLRLKLTGKRFFLVLDDVWNRNQEKWKDLLTPLNDGAPGSKIVVTTRDKKVASIVGSNKIHSLELLQDDHCWRLFAKHAFQDDSHQPNPDFKEIGAKIVEKCKGLPLALTTIGSLLHQKSSISE…
HK_NBARC_NBARC.Chr13.16	Chr13	TGFam.ISGAP	31187838	31191212	ATGGCACTAGAATTGGTTGGTGGTGCTCTTCTTTCTGCTTTCCTTCAGGTTGCGTTTGAGAAGCTTGCTTCTCCTCAAGTTCTGGACTTCTTTCGTGGAAGAAAGCTTGATGAAAAGCTGCTCAACAACTTGGAAATCAAGCTGAACTCCATACAGGCTCTGGCTGATGATGCAGAACTAAAGCAGTTCAGAGATCCACCTGTCAGGAACTGGCTTCTTAAGGTCAAAGATGCTTTGTTTGACGCAGAGGATCTCTTGGATGAAATACAACATGAGATCTCCAAATGCCAGGTCGAAGCTGAAGCTGAAGCTGAGTCTCAAACCTGCACTTGCAAGGTACCAAATTTCTTCAAATCTTCTCCTGTTGGTTCCTTTAACAAGGAAATTAAATCAAGGATG…	MALELVGGALLSAFLQVAFEKLASPQVLDFFRGRKLDEKLLNNLEIKLNSIQALADDAELKQFRDPPVRNWLLKVKDALFDAEDLLDEIQHEISKCQVEAEAEAESQTCTCKVPNFFKSSPVGSFNKEIKSRMEQVLEDLENLASQSGYLGLQNASGVGSGFGGAVSLHSESTSLVVESVIYGRDDDKEMIFNWLTSDIDNCNKLSILSIVGMGGLGKTTLAQHVFNDPRIENKFDIKAWVCVSDEFDVFNVTRTILEAVTKSTDDSRNRETVQGRLREKLTGNKFFLVLDDVWNRNQKEWKDLQTPLNYGASGSKIVVTTRDKKVASIVGSNKTHCLELLQDDHCWRLFTKHAFRDDSHQPNPDFKEIGTKIVEKCKGLPLALTTIGSLLHQKSSISE…
HK_NBARC_NBARC.Chr13.17	Chr13	TGFam.ISGAP	31291846	31295544	ATGGCAGAAACATTAGTTGGTGGTGCTCTTCTTTCTGCTTTCCTTCAGGTTGTATTTGACAAGCTTGCTTCACGTCAAGTTCTGAACTTCTTTCATGGAAGAAAATTGGATGAGATGCTGCTGAGCAATTTGAATGTCAAGCTGCTCTCCATTGATGCTCTGGCTGCTGATGCAGAACAAAAGCAGTTCAGAGATCCTCGTGTGAGAGCATGGCTCGTTGATGTCAAAGATGTTGTGCTTGACGCAGAGGATGTTTTGGATGAAATAGACTATGAACTCTCCAAATTTGAAGTGGAAACTGAATTGGAATCTCAATCTCTAACCTGTACTTGCAAGGTACCAAATCTCTTCAACGCGTGTTTCAGTTCATTAAATAAAGGGAAAATTGAGTCAAGGATG…	MAETLVGGALLSAFLQVVFDKLASRQVLNFFHGRKLDEMLLSNLNVKLLSIDALAADAEQKQFRDPRVRAWLVDVKDVVLDAEDVLDEIDYELSKFEVETELESQSLTCTCKVPNLFNACFSSLNKGKIESRMREVLQKLEYLSSQKGDLGLKEGSGGGVGSGRKMPHKLPSTSLLSESVIYGRDDDREMVINWLISDNENCNQLSILSIVGMGGLGKTTLAQHVFNDPKMEDQFSIQAWVCVSDELDVFKVTRTILEAITKSTDDSRDLEMVQGRLKDKLAGKRFLLVLDDIWNENRENWEAVQTPLKYGAQGSRILVTTRSKKVASIMRSNKVHHLNQLQEDHCWQVFGKHAFQDDNSLLNPELKEIGIKIVEKCKGLPLALKTIGSLLHTKSSVSE…
HK_NBARC_NBARC.Chr13.18	Chr13	TGFam.ISGAP	31392257	31395823	ATGGCGTTAGAATTCGTTGGTGGTGCTGTTCTCTCTTCTTTCCTTCAGGTTACATTTGACAGGCTGGGTTCTCATCAAGTTCTGGACTTCTTTCGTGGAAGAAAACTCGATGAGACGCTACTGAGCAAGTTGAAGGTGAAGTTACTGTCCATAGATGCTCTAGCTGATGATGCAGAACAAAAGCAGTTCAGAGATTCACGTGTGAAAGCATGGCTTGTTGCTGTCAAAGATGCGGTGCATGAGTCAGAGGATGTCTTGGATGAAATAGAATACGAACACTCCAAATGCCAAGTGGAAGCTGAACCTGAATCTCAAACCTGTACTTGCAAGGTACCAAATTTCTTCAAATCTTCTCCTCTTAGTTCCTTTAACAAGGAAGTTAAATCAAGGATGGAACAA…	MALEFVGGAVLSSFLQVTFDRLGSHQVLDFFRGRKLDETLLSKLKVKLLSIDALADDAEQKQFRDSRVKAWLVAVKDAVHESEDVLDEIEYEHSKCQVEAEPESQTCTCKVPNFFKSSPLSSFNKEVKSRMEQLIGSLEFLSSQKGDLGLNNASGVGSGFGSEVSQKSPSTSLVVESVIYGRDNDKEMIINWLTSDSGNHNKLSILSIVGMGGMGKTTLAQHAYNDPRIDDVFDIKAWVCVSDDFTVFKVTRTILEAITKSTDDSRNLQMVHERLQVELKDKKFLLVLDDVWNEKLDEWVAVQTPLYFGAQGSRIIVTTRNKKVASSMRSKEHYLQQLQEDYCWQLFAEHAFQNANPQSNPDFMKIGMKIVEKCKGLPLALKTMGSLLHTKSILEWKGI…
HK_NBARC_NBARC.Chr13.19	Chr13	TGFam.ISGAP	31411890	31415513	ATGGCAGTAGAATTAATTGCTGGTGCTCTTCTTTCTTCTTTCCTTCAGGTTGCATTCGAAAAGCTTGCTTCTCCTCAAGTTCTCCACTTCTTTCACGGAAAAAAACTTGATGAGACGCTTCTGAGAAAGTTGAAAATTAAGCTGCTGTCCATCGATGCTCTGGCTGATGATGCTGAACGAAAGCAGTTCGCAGATCCACGCGTGAGAAACTGGCTTCTTGAGGTCAAAGATATGGTTTTTGATGCAGAGGATCTCTTGGATGAAATGCAATATGAATTCTCCAAATGGGAACTGGAAGCTGAATCTGAATCTCAGACCTGTACCGGCTGTACTTGCAAGGTACCAAATTTCTTCAAATCTTCTCCTGCTAGTTCCTTTAACAGGGAAATTAAATCCAGG…	MAVELIAGALLSSFLQVAFEKLASPQVLHFFHGKKLDETLLRKLKIKLLSIDALADDAERKQFADPRVRNWLLEVKDMVFDAEDLLDEMQYEFSKWELEAESESQTCTGCTCKVPNFFKSSPASSFNREIKSRMEKILDSLEFLSSQKDDLGLKNASGVGVGSELGSAVPQISQSTSSVVESDIYGRDKDKKMIFDWLTSDNGNPNQPSILSIVGMGGMGKTTLAQHVFNDPRIQEARFDVKAWVCVSDDFDAFRVTRTILEAITKSTDDSRDLEMVHGRLKEKLTGKRFLLVLDNVWNENRLKWEAVLKHLVFGAQGSRIIATTRSKEVASTMRSKEHLLEQLQEDHCWKLFAKHAFQDDNIQPNPDCKEIGTKIVEKCKGLPLALKTMGSLLHDKSS…
HK_NBARC_NBARC.Chr13.20	Chr13	TGFam.ISGAP	31475406	31478786	ATGGCAGTAGAATTAATTGCTGGTGCTCTTCTTTCTTCTTTCCTTCAGGTTGCATTTGAAAAGCTTGCTTCTCCTCAAGTTCCGGACTTCTTTCACGGAAAAAAACTTGATGAGACGCTTCTGAGAAAGTTGAAAATTAAGCTGCAGTCCATCGATGCTCTGGCTGATGATGCTGAACGAAAGCAGTTCGCAGATCCACGCGTGAGAAACTGGCTTCTTGAGGTCAAAGATATGGTTTTTGATGCAGAGGATCTCTTGGATGAAATACAATATGAATTCTCCAAATGGGAACTCGAAGCTGAATCTCAGACCTGTACCGGCTGTACTTGCAAGGTACCAAATTTCTTCAAATCTTCTCCTTCTAGTTCCATTAACAGGGAAATTAAATCCAGGATGGAA…	MAVELIAGALLSSFLQVAFEKLASPQVPDFFHGKKLDETLLRKLKIKLQSIDALADDAERKQFADPRVRNWLLEVKDMVFDAEDLLDEIQYEFSKWELEAESQTCTGCTCKVPNFFKSSPSSSINREIKSRMEKILDSLEFLSSQKDDLGLKNARGVSVGSELGSEVPQISQSTSLVVESDIYGRDEDKKMIFDWLTSDNGNPNQPSILSIVGMGGMGKTTLAQHVFNDPRIQEAKFDVKAWVCVSDDFDVFRVTRTILEAITKSTDDSRDLEMVHGRLKEKLTGKKFLLVLDDVWNENRLKWEAVLKPLVFGAQGSRIIVTTRSKEVASTMRSKEHLLEQLHEDHCWKLFAKHAFQDDNIQPNPDCKEIGKKIVEKCKGLPLALKTMGSLLHNKLSVR…
HK_NBARC_NBARC.Chr13.21	Chr13	TGFam.PM	31511838	31515509	ATGGCAGAAGCATTGGTTGGCGGTGCTCTTCTTTCTGCTTTCCTTCAGGTTGCATTTGACAGGTTGGCTTCACGCCAAGTGGTGGACTTCTTTCGCGGAAGAAAGCTCAATGAAAAGCTGCTGAAGAAGCTGAAGGTGAAGCTTCTGTCCATAAATGCTGTGGTTGATGATGCAGAACAAAAGCAGTTTGAGAATTCATATGTGAAAGCATGGCTTGATGAGGTCAAAGATGCTGTGTTTGATGCAGAGGATCTGTTGGATGAAATAGACTTAGAATTCTCCAAATGCGAGTTGGAAGCCGAATCCCGGGCCGGTACTAGAAAGGTACGAAATTTTGACATGGAAATTGAATCAAGGATGAAACAAGTCCTTGATGACTTGGAATTTCTTGTAAGTCAA…	MAEALVGGALLSAFLQVAFDRLASRQVVDFFRGRKLNEKLLKKLKVKLLSINAVVDDAEQKQFENSYVKAWLDEVKDAVFDAEDLLDEIDLEFSKCELEAESRAGTRKVRNFDMEIESRMKQVLDDLEFLVSQKGDLDLKEGSGVGVGLGSKVSQKLPSTSLVVESDIYGRDEDKEMIFNWLTSDNEYHNQLSILSVVGMGGVGKTTLAQHVYNDPRIEGKFDIKAWVCVSDDFDVLTVTRAILEAVIDSTDNSRGLEMVHRRLKENLIGKRFLLVLDDVWNEKREKWEAVQTPLTYGARGSRILVTTRTTKVASTVRSNKELHLEQLQEDHCWKVFAKHAFQDDNPRLNVELKEIGIKIVEKCKGLPLALKTIGSLLYTKVSASEWKNVFLSKIWDLP…
HK_NBARC_NBARC.Chr13.22	Chr13	TGFam.ISGAP	31554929	31558683	ATGTCGAAGGCAGTTTCAGAATCTATTGATATTAGGGCTTACGATGTTTTCCTCAGTTTTAGAGGAGAAGACACTAGACGCAGTTTCACGGGTAATCTCTACAATTATTTGGAGAAAAGGGGAATCCATACCTTCATTGGCGACTACGATTTTGAGAGTGGAGAGGAAATCAAAGCATCACTTTCGGAGGCGATTGAACATTCAAGAGTTTTCGTTATAGTGTTCTCCGAGAACTATGCTTCTTCTTCTTGGTGCTTAGATGAACTTGTACGTATCCTTGACTTCACCGAGGATAACCATCGACCGGTTATTCCAGTTTTCTATTACGTTGATCCGTCCGATGTGAGACATCAGAAGGGGATCTACGGAGAAGCACTGGCTATGCATGAGAGAAGACTC…	MSKAVSESIDIRAYDVFLSFRGEDTRRSFTGNLYNYLEKRGIHTFIGDYDFESGEEIKASLSEAIEHSRVFVIVFSENYASSSWCLDELVRILDFTEDNHRPVIPVFYYVDPSDVRHQKGIYGEALAMHERRLNHESYKVMKWRNALRQAATLSGWPFKHGDGYEYELIEKIVEDISNKIKISRPVVDRPVGLEYRMLEVNWLLDATSLAGVHVIGICGMGGIGKTTLARAVYHSAAGHFDTSCFLGNVRENAMKHGLVHLQQTLLAEIFRENNIRLTSVEQGISLIKKRLHRKRLLLVLDDVRELDDLRALVGSPDWFGPGSRVIITTRDRQLLKSHGVDKVYEVEVLTNGEALELLCWKAFRTVRVHPDLINKLNRAITFASGIPLALELIGSSLYG…
HK_NBARC_NBARC.Chr13.23	Chr13	TGFam.ISGAP	31566746	31568466	ATGCAAGCCTTTAGCTACTTGGTTGAGCCCTTCAAATATCATGTGTTCCTCAGCTTCAGAGGCAAAGATACACGCTTCACTTTTACTGGCAACCTCTACCGTGCTCTCCGAGATCGGGGATTCTGCGTCTTCATGGATGATCAGAGAATTGACAAGGGGGAGAAAATATCTCAAGAACTCCCCAAGGCGATTGAGGAGTCCAGGATTTATATTATCGTTTTATCTGAGAATTTTGCTTCTTCCCGGTATTGCTTAGTTGAAGTTGTTATGATTCTTGATGAGTTCGCTAAGGGGAAGGGTCGATGGATTGTGCCGGTTTTCTTCTACGTCGATCCCTCTGTTCTGCTTCGTACTTATGAACCGGCATTGGCAAACCAGAAGAAGTGGTCTAGTGATGAC…	MQAFSYLVEPFKYHVFLSFRGKDTRFTFTGNLYRALRDRGFCVFMDDQRIDKGEKISQELPKAIEESRIYIIVLSENFASSRYCLVEVVMILDEFAKGKGRWIVPVFFYVDPSVLLRTYEPALANQKKWSSDDKIEEWRTALTKLSKFPGFCVSRDGNIFEYQHIDEIVKEVSRHVLCPIGLDEKIFKVNLLLSSGSDGVRMIGICGEAGIGKITLAHEVFHFNADKVFDHCLLFYDVGGISNQSGILSILHGKRVFIIFQDIKHFKQLEDIRELTKQLGSGSKVIITAQDKHLLDRCGIGFESIYEIKRFSDSEADQFLKFKVLNSATVSPKYVNILNRIKSYALGHPWTLEVMCSNLSGKSIEECESALLKYESITDRDIQKILEVSFSALEKCQQQ…
HK_NBARC_NBARC.Chr13.24	Chr13	TGFam.ISGAP	31575146	31577758	ATGTCGGAACCCAAGACATCTGAAGTGCTGATCAGCTGCGCCAAAGATACATACCAAGGTTTTGCGGGCGATCTCTTAAGATCTCTCGAAGTATGCGGATTCTCCGTTAAGGTAGTCTCAGAAGACCATCGGGATCTTAAGGAAGAGGAAACTGAATGCGTCAGGATTTTCATTATTGTTTTTTCCCATCACTATGCAACTTCTTCATCTCGTTTGGATAAACTTACCGAGATCGTAAATAAGTACGGTGCGGCAGAAGATCGACGCATTTTTCCAGTTTTCTTCGAGGTGGAACCGTCTCATGTACGCTTTCAAAAAGGTAGTTTTGATATAGCCTTTGATTCTCATGCCAACCATGTGGAGCCTGGGTGCTTAGACAGGTGGATAATTACTCTGAAA…	MSEPKTSEVLISCAKDTYQGFAGDLLRSLEVCGFSVKVVSEDHRDLKEEETECVRIFIIVFSHHYATSSSRLDKLTEIVNKYGAAEDRRIFPVFFEVEPSHVRFQKGSFDIAFDSHANHVEPGCLDRWIITLKEVTDFSGWSLNRSGNTYQHQVIENIVQKVSDHVSCSVGLPCRVEKVNDLLKSESDDRVRVLVYGEAGIGKTTVVRGVCRSNGGKFAYYCFLEKVGENLRNHGSVHLIRMLCSKIIVDNDSESGTEEEILRKKGKQLGKSLLVFEDIFDQEQLEYIVKVAYDCFSFNSKVIITAEKNCFLKCPEIEIYEVERLTEKESIELFNLKVFNSRYLEITYLGIIARAVTMASRVPYTLELIASYFREKSAEQCQYILDEFEKIPNENKKQV…
HK_NBARC_NBARC.Chr13.25	Chr13	TGFam.ISGAP	31586471	31590224	ATGTCGAAGGCAGTTTCAGAATCTATTGATATTAGGGCTTACGATGTTTTCCTCAGTTTTAGAGGAGAAGACACTAGACGCAGTTTCACGGGTAATCTCTACAATTATTTGGAGAAAAGGGGAATCCATACCTTCATTGGCGACTACGATTTTGAGAGTGGAGAGGAAATCAAAGCATCACTTTCGGAGGCGATTGAACGTTCAAGAGTTTTCGTTATAGTGTTCTCCGAGAACTATGCTTCTTCTTCTTGGTGCTTAGATGAACTTGTACGTATCCTTGACTTCACCGAGGATAACCATCGACCGGTTATTCCAGTTTTCTATTACGTTGATCCGTCCGATGTGAGACATCAGAAGGGGATCTATGGAGAAGCACTGGCTATGCATGAGAGAAGACTC…	MSKAVSESIDIRAYDVFLSFRGEDTRRSFTGNLYNYLEKRGIHTFIGDYDFESGEEIKASLSEAIERSRVFVIVFSENYASSSWCLDELVRILDFTEDNHRPVIPVFYYVDPSDVRHQKGIYGEALAMHERRLNHESYKVMKWRNALRQAATLSGWPFKHGDGYEYELIEKIVEDISNKIKISRPVVDRPVGLEYRMLEVNWLLDATSLAGVHVIGICGMGGIGKTTLARAVYHSAAGHFDTSCFLGNVRENAMKHGLVHLQQTLLAEIFRENNIRLTSVEQGISLIKKRLHRKRLLLVLDDVRELEDLQALVGSPDWFGPGSRVIITTRDRQLLKAHGVDKVYEVEVLANGEALKLLCWKAFRTDRVHPDFISKLNRAIAFASGIPLVLELIGSSLYG…
HK_NBARC_NBARC.Chr13.26	Chr13	TGFam.ISGAP	31651383	31655015	ATGGCAGTAGAATTAATTGCTGGTGCTCTTCTTTCTTCTTTCCTTCAGGTTGCATTTGAAAAGCTTGCTTCTCCTCAAGTTCTGGACTTCTTTCACGGAAAAAAACTTGATGAGACGCTTCTGAGAAAGTTGAAAATTAAGCTGCAGTCCATCGATGCTCTGGCTGATGATGCTGAACGAAAGCAGTTCGCAGATCCACGCGTGAGAAACTGGCTTCTTGAGGTCAAAGATATGGTTTTTGATGCAGAGGATCTCTTGGATGAAATACAATATGAATTCTCCAAATGGGAACTCGAAGCTGAATCTGAATCTGAATCTCAGACCTGTACCGGCTGTACTTGCAAGGTACCAAATTTCTTCAAATCTTCTCCTGCTAGTTCCTTTAACAGGGAAATTAAA…	MAVELIAGALLSSFLQVAFEKLASPQVLDFFHGKKLDETLLRKLKIKLQSIDALADDAERKQFADPRVRNWLLEVKDMVFDAEDLLDEIQYEFSKWELEAESESESQTCTGCTCKVPNFFKSSPASSFNREIKSRMEKILDSLEFLSSQKDDLGLKNASGVGVGSELGSEVPQISQSTSLVVESDIYGRDEDKKMIFDWLTSDNGNPNQPSILSIVGMGGMGKTTLAQHVFNDPRIQETKFAVKAWVCVSDDFDVFRVTRTILEAITKSTDDSRDLEMVHGRLKEKLTGKKFLLVLDDVWNENRLKWEAVLKPLVFGAQGSRIIATTRSKEVASTMRSKEHLLEQLQEDHCWKLFAKHAFQDDNIQPNPDCKEIGTKIVEKCKGLPLALKTMGSLLHNK…
HK_NBARC_NBARC.Chr13.27	Chr13	TGFam.ISGAP	32580912	32587101	ATGGCCGCATCGATTCAGGACGCCAAGAACCGCATCTCGCAGATCGAGCGTGCGACGCTGCTGGCGAGAATTGACGAGTTGGACGAGAAATTGAGATTGAAGACGCGGGAGATTGAGGAGGCGGACGGGAAGCTACTCGAGAGCGTGGAGGCGCTGACGTGCGAGTTAAGGGATGAGAAATTGAAGAGGAATCGCGTGACGGAGGCGTATAAGAGGCTTAAGTCTCAGCACGTTTACCTTCGGAGAAAGGTTGGTCTCGGTGAAGAGAATGTGGTTCAGGAAAACAAATTGGAGTGTGCAAGTGAATTGGAGATGCTTCAGAGTCCAATCGTAGAACCTGGCCTTGAAACGAAAACTCCAGATGTGTTTGTTGCCACATGTGTCATAAAGAGAGTCAAG…	MAASIQDAKNRISQIERATLLARIDELDEKLRLKTREIEEADGKLLESVEALTCELRDEKLKRNRVTEAYKRLKSQHVYLRRKVGLGEENVVQENKLECASELEMLQSPIVEPGLETKTPDVFVATCVIKRVKEKPSEIDRGCNLSSPSSGFRDVPKCPSNTKLVSVSSTKRPVSSWRQTRSHQSRVGPDPHDDFLDTSLENIRENLNKDLNKEDQPCLIQKDISADSSDDETHDMNAKSSPQKKQKQSSVTVANTRSFKYVEPVRKKAERENLKGVECKQCRKFYDAVLPNADGKDADSKQSFRCEHLDGVSRHRYRYVPPMTPEGFWNIGFESEIIRTQSKNQRRKKDQGGKSTNLITSETSYRRLSWQQNVKSFLIITFGAFIESINGCLRFFHVP…
HK_NBARC_NBARC.Chr13.28	Chr13	TGFam.AUG	37275437	37295818	ATGGCCGAGGTATACAATTCTCTAGATGTTGAAAACATTCAAGGCCAAATTGCTAATGCCTTGGGTCTGAAATTGGATGAAGAGACAAAAGAAAGGAGAGTGCAACAATTGCGTCAAAGGATAAGAAAGGAGAAGAATATTCTTGTTATTCTGGATGATATTTGTGGGAAACTTGATTTGGCAGAAGTGGGGATTCCTTTTGGTGATGACCACAAAGGATGCAAGTTAGTGTTGACATCTGAATATCTAAATGTGCTTAAATGTCAGATGGGTACTCAAAAAGATTTTAAACTTGAGGTATTATCTGACAATGATAGTTGGAAGTTGTTTGAGAAGATTGCAGGTGATGATATCCGAATGAACAATAAAGATAAATCTATTGCACAAAATGTGGCCAAA…	MAEVYNSLDVENIQGQIANALGLKLDEETKERRVQQLRQRIRKEKNILVILDDICGKLDLAEVGIPFGDDHKGCKLVLTSEYLNVLKCQMGTQKDFKLEVLSDNDSWKLFEKIAGDDIRMNNKDKSIAQNVAKCCDGLSLFIVIVAKALRKKHVKLSILECMLLFDMAKAMASRTHLNNEEQKFTQMEQWDIDQLQKCHYINLPSYNIDELPKKLDCPELKLISLRRNHGYLTIPDNFFSGTREVKVNNLHGMRFAPSPLPSLRLLTNLISLNLYGCVLEDIAIVAELRRLEILTLERSKIQELPKEIGQLVCLRMLDLTNCHQLKTIPANLLSSLTNLEELYILDHSLKTNICLNRWVQLLFTTVEDLRLAKLNFGNHNNVSYEWKGESFPQLRHLHI…
HK_NBARC_NBARC.Chr14.1	Chr14	TGFam.ISGAP	676393	684007	ATGGAATGCCTTTACGGTTTTGCATCTTCTATTTCAAGAGATTTAGTGTGCGGAGCAATAAATCAATTACGTTATCCTTGTTATTTTAACAATTTGATTGAAGAGCTTGAGAAAGAAGAGGGCAATTTGATTGTAACGAGAAATGATGTCCAAAAATTTGTTGCACATGCCAATAACCAAACGAGAACGACTGCTGAAGTTGTTAACCACTGGCTACAGGATGCTGAGAATGACATAGACAATGTGAATCAGTTGCTGAAAGAGGCAAGAACAAAAAAAAGTTGTTGTTTTGGGCACTCTCCAAATTGGATTTGGCGATACTGTGTAGGAAAGAAGTTAGCAAATAAAACTAGGGACCTTGAAAAGCGCATTCAAAGAGGTAGACCATATATTCAAATT…	MECLYGFASSISRDLVCGAINQLRYPCYFNNLIEELEKEEGNLIVTRNDVQKFVAHANNQTRTTAEVVNHWLQDAENDIDNVNQLLKEARTKKSCCFGHSPNWIWRYCVGKKLANKTRDLEKRIQRGRPYIQIERNTTLPSSTLDILSEKCMNFDSRESSYEKLMEALKDNEVAMIGLYGMGGCGKTTLGMEVTKIAKAEDLFDKVLFVPVSSTVDVPRIQEKIASSMGYGFPENEKGERERAQRLCMRLTQENKLLVILDDVWEKLDFGAIGIPFFEHHKGCKVLITTRSEAVCTSMDCQRMIHLPILTSEEAWALFQEKALITEGTPDTVKHLARLISNECKGLPVAIAAVASTLKGKAEVEWRVALGRLKSSKPMNIEKGLQDPYKCLQLSYDNLD…
HK_NBARC_NBARC.Chr14.2	Chr14	TGFam.PM	3846140	3850446	ATGTTACGTGGAGAATCCTCCTCAAATTCTCCGAATGCGTCTTCGCGATTGACCTACCATGTTTTCTTGAGTTTTAGAACGGAAGGCACCCATTTAGATTTTGCTAACACCTTATGTACTTCGTTGCAGCGAAATGGAATCTCAACTTTCAGATATGATAAACAAAAGGAAAGAGGATATGTGATTTTGGAAAAACTTCATAAAGTAATTGAGCAGTGCCTCGTTGTCATTGTTCTTCTCTCCGAGAACTATGCTTCTTCCACTTGGTGTTTGGATGAACTCCACAAGATTCTTAAATCGAAGAGGGTGCTGGGGACACCAGTTTTTCCTCTCTTTTATGATGTCGTTCCTTCCGATGTTCGACACCAGAAAAATAAATTCGCTGAGGCTTTCGAAGAA…	MLRGESSSNSPNASSRLTYHVFLSFRTEGTHLDFANTLCTSLQRNGISTFRYDKQKERGYVILEKLHKVIEQCLVVIVLLSENYASSTWCLDELHKILKSKRVLGTPVFPLFYDVVPSDVRHQKNKFAEAFEEHATRPEEDKVKVQKWRESLHEVAGFSGWESKNWKKEELIEEIIESVWTKLRPKLPSYDDGLVGIDSRVEKMNSLLKLELKDKVCFIGIWGMGGIGKTTLARVVFKKIRNKFDISCFLENVREISQNSDGMLSLQGKLLSHMKMKDLKIQNLDEGKSIIGGILFNNKVLLVLDDVNDIRQLENLSVNDQKWLGPGSRIIIITRDMEVLRSHGTVESYKIDLLNSDESLQLFSQKAFKRDQPLEHLLQLSKVAVQQAGGLPLAIEMMG…
HK_NBARC_NBARC.Chr14.3	Chr14	TGFam.AUG	6777729	6778091	ATGGTTGGAATTAAGGAAAATTATCAACAAATTGAATCATTATTAAAAAATGGGACAAGTGAAGTTAAAATTCTTGGAATATGGGGCATGGGTGGTATAGGTAAAACCACCCTTGCTGCAGCTTTATATGACAATCTGTCGTATGATTTCGAAGGGCGTTGCTTCCTCGCAAAATTAAGGGGAAAATCAGACAAGCTTGAAGCTTTACGTGATGAGCTTTTTTCTAAATTGTTAGGAATTAAAAATTATTGTTTTGATATTTCTGACATAAGTAGGCTTCAACGTAAAAAAGTTTTCATAGTCTTGGATGATGTGGCTACCTCAGAGCAATTAGAAACACTAAACACTGATAAAAGAATATGA	MVGIKENYQQIESLLKNGTSEVKILGIWGMGGIGKTTLAAALYDNLSYDFEGRCFLAKLRGKSDKLEALRDELFSKLLGIKNYCFDISDISRLQRKKVFIVLDDVATSEQLETLNTDKRI*
HK_NBARC_NBARC.Chr14.4	Chr14	TGFam.ISGAP	6798721	6802416	ATGAAGAAACAAAAAGAAAAGAAAAATAGCACTAGTTGGCGCAAAACCATGGTGCTAACGGAGTTCTTCCACGCCGAGATCTCATCGGAGCTATGGAAAATGCTGGTGTCAATTTCCCGAAAAGCCCTCCGCTGCAAGTCGAGCGCCAAGAGCCTCATCTCCTACGTCCACGAGCTCCTTCCGACGATCGAAGAGATCAAGTACTCCGGCGTGGAGCTGCCGGCGCCGCGCCAGTCGCAGGTCGACCGCCTCTCGGAGATCCTCCGCTCCGGCGTCGAGCTCTCCCACCAGGCCCTCTCCTCCTCGCGCTGGAACGTCTACCGCAACTTCCAGCTCGCCAAAAAAATGGAGAAGCTCGAGAAGCACGTGACAAGGTTCTTGCAGGTTCCCATGCAGGCG…	MKKQKEKKNSTSWRKTMVLTEFFHAEISSELWKMLVSISRKALRCKSSAKSLISYVHELLPTIEEIKYSGVELPAPRQSQVDRLSEILRSGVELSHQALSSSRWNVYRNFQLAKKMEKLEKHVTRFLQVPMQAHILADVNHVRFEMAERFDRVEAANQRMEKFIGEMKIGVNGGGWVEEAVRSMQEDETWVEGCNGNNNGFGVGLEFGKNKVMEMVFTRSDVSVVGIWGIGGSGKTTLAREVCRDDQVRCYFKERILFLTVSQSPNLEQLRARIWGHVMGNQGLNGTYAVPQWMPQFECKVETQVLVVLDDVWSLPVLEQLVWKIPGCKFLVVSRFNFPTIFNATYRVELLGEHDALSLFCHHAFGQKSIPMGANVSLVKQVVAECGRLPLALKVIGAS…
HK_NBARC_NBARC.Chr14.5	Chr14	TGFam.ISGAP	6805627	6809045	ATGGCCCTGAACGATTTTTTCGCGGGGGAGATCGCGACGGAGCTTCTGAAAATGCTGATCAGCATCTCCCGCAAGTCCCTCCTCTGCCGCGCCAGCGCCGACCAGCTCATCAGCTACATCCACGACCTCCTCCCCTCCATCGAGGAGATCAAGTACTCCGGCGTCGAGCTTCCTGCACTGCGCCAATCGCAACTCGACCGTCTCTCGGAGATTCTCCGCTCCGGCGTCGAGCTCTCCCACAAGGTCCTCTCCTCCAGCCGCTGGAACGTCTACCGCAACCTCCAGCTCGCCAAGAAAATGGACAAGCTCGAGAAGAACGTCTCCAAGTTCCTGTTGGGTCCCTTGCAGGCACACATGTTGGCCGACATACACCACACCCGGTTCGAGATGACCGAGCGG…	MALNDFFAGEIATELLKMLISISRKSLLCRASADQLISYIHDLLPSIEEIKYSGVELPALRQSQLDRLSEILRSGVELSHKVLSSSRWNVYRNLQLAKKMDKLEKNVSKFLLGPLQAHMLADIHHTRFEMTERFDRVDNSVQRLEKYFGNMKIGVGGGGWVEEAVRSVDEDVVDSSSAVGLGFGKNKVREMVVGRDDLWVVGISGIGGSGKTTLARELCKDDQVRCYFRDRILFLTVSQSPNVEQLRTNIWEYIMGNERLDANYMVPQWMPQFECRSEARTLIVLDDVWTLSVVDQLVCRIPGCKFLVVSRPKFQTVLSYEVELLSEEDALSLFCHHAFGQKSIPLAANENLVKQVVTECGRLPLALKVIGASLRDQTEMFWLSVKNRLSQGQSIGESH…
HK_NBARC_NBARC.Chr14.6	Chr14	TGFam.ISGAP	27499669	27507006	ATGGCTTCTACTTGTTCTTCCTCTTTTTCCGTTACCAAAAAATATGATGTTTTCATCAGCTTTAGAGGAGAGGATACTCGCGCTGACTTCACTAGCCATCTTCATGCTGCTCTGCGCAGAAACAACATCGATACATACATAGACTACAGGATCCACAAAGGAGACGAGATCTGGGTAGAAATCATGAAAGCAATCAAAGAGTCCACTCTCTTCTTGGTTATTTTCTCAGAGAACTATGCGTCTTCTAGTTGGTGCTTGAATGAACTCATCCAACTAATGGAATACAAGAAACATGAAGATGTTGATGTTATTCCGGTGTTCTACAAAATAGATCCATCTGAGGTACGCAAACAAAGTGGGAGTTATCACATGGCATTCGCAAAACACGAGAAGGATAGA…	MASTCSSSFSVTKKYDVFISFRGEDTRADFTSHLHAALRRNNIDTYIDYRIHKGDEIWVEIMKAIKESTLFLVIFSENYASSSWCLNELIQLMEYKKHEDVDVIPVFYKIDPSEVRKQSGSYHMAFAKHEKDRKVTEDKMQKWKNALYEAANLSGFLSDAYRTESNMIEDIIKVILQKLNHKYPNDFRGQFVSDENYASIESLLKIDSEEVRVIGIWGMGGIGKTTIAEVIFHKISSRYEGSSFLKNVAEESKRHGLNYICKELLSKLLREDLHIDTPKVIPSIITRRLKRKKVLIVLDDVNTSELLENLVGVGRDWLGAGSRVIVTTRDKHVIMGEVVDKIHEVKKMNFQNSLELFSLNAFGKTYPQKGYEELSKRAMGYAKGIPLALKVLGSLLRSR…
HK_NBARC_NBARC.Chr14.7	Chr14	TGFam.PM	41120798	41122340	ATGATTGCAAAGGAGATTCTTCAGAAGAATTGGAATGACAAAGACATGATAGGGTGGTCGTTCTCCAGAAGAATTGGTCAATTGTGTATATTCCAGCAAGTTGAGATGAGTGGAGGCACACATAACCAAAACAATGAAACAGGTGATGTAAAAGATCATACGAACGGAGGTAGCAATGGTGATGATGCTTTGACTATAAATCAGTTGCTATCCAGACTAACAAGGGCAGAAGACAACATTGATAAAAAATTACAGTGGCTGGAGTTCCAGGGCAATAAGCGCAAGAGACAAGATGACGATTGGTTGGATAAACTAAAGGACCTGAAAAAAAGAGCTATTGATGTGAAAAACTCACTGCATCAGTCTGGGTCGACTAATGAATTCCCCGAGCCTTATGAA…	MIAKEILQKNWNDKDMIGWSFSRRIGQLCIFQQVEMSGGTHNQNNETGDVKDHTNGGSNGDDALTINQLLSRLTRAEDNIDKKLQWLEFQGNKRKRQDDDWLDKLKDLKKRAIDVKNSLHQSGSTNEFPEPYELDERDENMEKMWDLLEHEEVLIIGIDGMGGVGKTFMATHFKNEIKRKGTFKDVFWVTVFDDFTTFKLQHDIAATIQVKLYGDEMTRATILTLELEKRGKTLLILDDVWEYIDLQKVGIPLKVNGIKLIITTRLKHVCLQMDCLPNNIIRMHPLSGEEAWELFLLKLGHRGTPARLPPHVLEIARSVVMKCDGLQLGISVMARTMKGKNEIYWWRHALNILDRLEMGEEVLSVLKRSYDNLIEKDIQKCFLRSALFPNETRKEEWVM…
HK_NBARC_NBARC.Chr14.8	Chr14	TGFam.PM	44562482	44569483	ATGGGGGATATCGTTGTTTCCATCGTAGCAAAGTTAGCAGAATATACAGTGGGCCCAATTTTACACCATGCTCGATACTTGTGCTGTTTCAACAACATTGCTTGGAATCTTCTAATTGCCAAGGAAGAATTGGAATTAACCCGAAACAGTGTGAATGAACGAGTTGAAGAAGCTATTAAGAGGACTGAAAAAATTGAACCAGCAGTTGAGAAGTGGCTGAAAGATGTTGAGAAAGTTTTAGAAGAAGTGCATATGCTCCAAGGAAGAATTTCAGAAGTAAACAAGAGTTATTTCAGAAGGCAATGCCAATATTTCCTTACAAAAAAAATAGCAAGAAAAATTGAGAAAATGGCTCAACTCAACCACAACAGCAAGTTTGAGCCATTTTCTAAGATTGCC…	MGDIVVSIVAKLAEYTVGPILHHARYLCCFNNIAWNLLIAKEELELTRNSVNERVEEAIKRTEKIEPAVEKWLKDVEKVLEEVHMLQGRISEVNKSYFRRQCQYFLTKKIARKIEKMAQLNHNSKFEPFSKIAELPGTKYYSSKDFVLFKSAESTYKNLLDALKDKSVSMIGLVGLGGSGKTTLAKAVGKKAVELKLFEKVVMVTVSPTPNIRSIQVQIADMLGLKFEEESEEVRAQRLSERLRKDTTLLILDDIWENLDFEAIGIPYNENNKGCGVLLTTRSREVCISMQCQTIIEVNLLTGEEAWDLFKSTANITDESPYALKGVATKIVDECKGLPIAIVTVGRTLKGKTVKEWELALSRLKDSEPLDIPKGLRSPYACLGLSYDNLTNELAKSLF…
HK_NBARC_NBARC.Chr14.9	Chr14	TGFam.ISGAP	45894827	45897295	ATGGTGAAAGAAGTGGTGAGCCAAATCAGAGATGTTGCCCACAAAGCTGAAGATGTGGTTGACACCTACGTTTCCAGCATTGCCAAACAAAAACAGAGAAGCAAACTGAGCAAGTTATTCCACCTCAAAGAACATGTCATGGTGCTTCACCAAGTCAACTCTGACATAGAGAAGATCAGGAGTCGGATCGATGAGATCTATAAGAACAGGGACAGATATGGCATTGGAGAAGGTGAATTCCGAAGCGAAGAAGCTGCTGCAGAAGCAGAATCACTCCTCAAAAGAAGGAGGGAGGTAGAGGAAGAAGATGTAGAACTCATGGAAAGTGAGTCACGTCTTAAAGTTGTTTCCATAATTGGAATGGGAGGGTTGGGTAAGACCACTCTTGCCCGTAAGATC…	MVKEVVSQIRDVAHKAEDVVDTYVSSIAKQKQRSKLSKLFHLKEHVMVLHQVNSDIEKIRSRIDEIYKNRDRYGIGEGEFRSEEAAAEAESLLKRRREVEEEDVELMESESRLKVVSIIGMGGLGKTTLARKIYNNNQVQLWFPCLAWVSVSNDYRPKEFLLSLLKCSMSSTSEELSEVELKKKIAEWLKGKKYLVVLDDIWETQVWDEVKGAFPDDQTGSRILITSRNKEVAHYAGTASPYYLPILNEDESWELFTKKIFRGEECPSDLEPLGRSIVKICGGLPLAIVVLAGLVAKKEKSQREWSRIKEVSWHLTEDKTGVMDILKLSYNNLPGRLKPCFLYFGIYPEDYEISARQLIKYWIAEGFIQPQKTGIADTTTELEDVADFYLDELVDRSLV…
HK_NBARC_NBARC.Chr14.10	Chr14	TGFam.ISGAP	46425872	46430964	ATGGGGGATATCGTTGTTTCCATCGTAGCAAAGTTAGCAGAATATACAGTGGGCCCAATTTTACACCATGCTCAATACTTGTGTTGTTTCAACAACATTGCTGGGAATCTTCCAAATGCCAAGGAAGAATTGGAATTAACCCGAAACAGTGTGAAGGAACGAGTTGAAGAAGCTATTATGAGGACGGAAATAATTGAACCAGCAGTTGAGAAGTGGCTGAAAGATGTTGAGAAAGTCTTAGAAGAAGTGCATATGCTTCAAGAAAGAATTTCGGAAGTAAGCAAGAGCTATTTCAGAAGGCAATTCCAATATTTTCTTACAAAAAAAATAGCAAGAAAAATTGAGAAAATGGCTCAACTCAACCACAACAGCAAGTTTGATCCATTTTCTAAGATTGCC…	MGDIVVSIVAKLAEYTVGPILHHAQYLCCFNNIAGNLPNAKEELELTRNSVKERVEEAIMRTEIIEPAVEKWLKDVEKVLEEVHMLQERISEVSKSYFRRQFQYFLTKKIARKIEKMAQLNHNSKFDPFSKIAELPGMKYYSSKDFVLFKSRESTYENLLEALKDKSVSMIGLVGLGGSGKTTLAKEVGKKAEELKLFEKVVMATVSQTPNIRSIQLQIVDNLGLKFVEESEEGRAQRLSERLRTGTTLLILDDVWENLDFEAIGIPYNENNKGCGVLLTTRSREVCISMQCQTIIELNLLTGEEAWDLFKLNANITGESPYVLKGVATKIVDECKGLPIAIVTVGSTLKGKTFEEWESALSRLEDSKPLDIPKGLRSPYACLQLSYDNLTNQLAKSLF…
HK_NBARC_NBARC.Chr14.11	Chr14	TGFam.AUG	46444465	46454419	ATGGGGGATATCGTTTTTTCCATCGTAGCAAAGTTAGCAGAATATACAGTGGGCCCAATTTTACACCATGCTCGATACTTGTGTTGTTTCAACAACATTGCAGGGAATCTTCCAAATGCCAAGGAAGAATTGGAATTAACCCGAAACAGTGTGAAGGAACGAGTTGAAGAAGCTATTAAGAGGACTCAAAAAATTGAACCAGCAGTTGAGAAGTGGCTGAAAGATGTTGAGAAAGTCTTAGAAGAAGTGCATATGCTTCAAGGAAGAATTTCGGAAGTAAGCAAGAGCTATTTCAGAAGGCAATGCCAATATTTTCTTACAAAAAAAATAGAAAGAAAAATTCAGAAAATGACTCAACTCAACCATGACAGCAAGTTTGAGCCATTTTCTAAGATTGCT…	MGDIVFSIVAKLAEYTVGPILHHARYLCCFNNIAGNLPNAKEELELTRNSVKERVEEAIKRTQKIEPAVEKWLKDVEKVLEEVHMLQGRISEVSKSYFRRQCQYFLTKKIERKIQKMTQLNHDSKFEPFSKIAELPGMKYYSSKDFVLFKSTESTYKKLLEALKDKSACTIGLVGLGGSGKTTLAKEVGKKAEELKLFEKVVMVTVSQTPNIRSIQVQIADKLGLKFDEESEEARAQRLSETLIKHTTLLILDDIWEILDFEAIGIPYNENNKGCGVLLTTRSRDVCISMQCQKIIELNLLAGNEAWDLFKLNANITDESPYALKGVARKIVDECKGLPIAIVTVGSTLKGKTVKEWELAFSRLKDSEPLDIPKGLRSPYVCLGLSYDNLTNELAKSLF…
HK_NBARC_NBARC.Chr14.12	Chr14	TGFam.ISGAP	46468037	46479131	ATGGGGGATATTGTTCTTTCCATCGTAGCAAAGTTAGCAGAATATACAGTGGGCCCAATTTTAGACCATGCTCGATACTTGTGTTGTTTCAACAACATTGCTGGGAATCTTCCAAATGCCAAGGAAGAATTGGAATTAACCCGAAACAGTGTGAAGGAACGAGTTGAAGAAGCTATTATGAGGACTGAAATAATTGAACCAGCAGTTGAGAAGTGGCTGAAAGATGTTGAGAAAGTCTTAGAAGAAGTGCATATGCTTCAAGGAAGAATTTCGGAAGTAAGCAAGAGCTATTTCAGAAGGCAATTCCAATATTTTCTTACAAAAGAAATAGCAAGAAAAATTGAGAAAATGGCTCAACTCAACCACAACAGCAAGTTTGAGCCATTTTCTAAGATTGCC…	MGDIVLSIVAKLAEYTVGPILDHARYLCCFNNIAGNLPNAKEELELTRNSVKERVEEAIMRTEIIEPAVEKWLKDVEKVLEEVHMLQGRISEVSKSYFRRQFQYFLTKEIARKIEKMAQLNHNSKFEPFSKIAELPGMKYYSSKDFVRFKSRESTYENLLEALKDKSACTIGLVGLGGSGKTTLAKEVGKKAEELKLFEKVVMATVSQTPNITSIQMQIADKLGLKFEEKTEEGRAQRLSERLRTGTTLLILDDVWEKLEFEAIGIPYNENNKGCGVILTTRSREVCISMQCQTIIELNLLAGNEAWDLFKLNANITDESPYALKGVATKIVDECKGLAIAIVTVGSTLKGKTVKEWELALSRLKDSEPLDIPKGLRSPYACLGLSYDNLTNELAKSLF…
HK_NBARC_NBARC.Chr14.13	Chr14	TGFam.PM	46490724	46497904	ATGGGGGATATCGTTCTTTCCATCGTAGCAAAGTTAGCAGAATATACAGTGGACCCAATTTTACACCATGCTCGATACTTGTGTTGTTTCAACAACATTGCTGGGAATCTTCCAAATGCCAAGGAAGAATTGGAATTAACCCGAAACAGTGTGAAGGAACGAGTTGAAGAAGCTATTAAGAGGACGGAAATAATTGAACCAGCAGTTGAGAAGTGGCTGAAAGATGTTGAGAAAGTCTTAGAAGAAGTGCATATGCTTCAAGGAAGAATTTCGGAAGTAAACAAGAGCCATTTCAGAAGGCAATTCCAATATTTTCTTACAAAAAAAATAGCAAGAAAAATTGAGAAAATGGCTCAACTCAACCACAACAGCAAGTTTGATCCATTTTCTAAGATTGCC…	MGDIVLSIVAKLAEYTVDPILHHARYLCCFNNIAGNLPNAKEELELTRNSVKERVEEAIKRTEIIEPAVEKWLKDVEKVLEEVHMLQGRISEVNKSHFRRQFQYFLTKKIARKIEKMAQLNHNSKFDPFSKIAELPGMKYYSSKDFVLFKSRESTYENLLEALKDKSVSMIGLVGLGGSGKTTLAKEVGKKAEELKLFEKVVMVTVSQTPNIRSIQVQIADKLGLKFVEESEEGRAQRLSKRLRTGTTLLILDDVWENLDFEAIGIPYNENNKGCGVLLTTRSREVCISMQCQTIIELNLLTGEEAWDLFKLNANITGESPYVLKGVATKIVDECKGLPIAIVTVGSTLKGKTFEEWESALSRLEDSKPLDIPKGLRSPYACLQLSYDNLTNQLAKSLF…
HK_NBARC_NBARC.Chr14.14	Chr14	TGFam.PM	46524612	46529882	ATGGGGGATATCGTTCTTTCCATCGTAGCAAAGTTAGCAGAATATACAGTGGGCCCAATTTTACACCATGCTCGATACTTGTGTTGTTTCAACAACATTGCTGGGAATCTTCCAAATGCCAAGGAAGAATTGGAATTAACCCGAAACAGTGTGAAGGAACGAGTTGAAGAAGCTATTATGAGGACTGAAAAAATTGAACCAGCAGTTGAGAAGTGGCTGAAAGATGTTGAGAAAGTCTTAGAAGAAGAGCATATGCTTCAAGAAAGAATTTCGGAAGTAAGCAAGAGCTATTTCAGAAGGCAATTCCAATATTTTCTTACAAAAAAAATAGCAAGAAAAATTGAGAAAATGGCTCAACTCAACCACAACAGCAAGTTTGAGCCATTTTCTAAGATTGCC…	MGDIVLSIVAKLAEYTVGPILHHARYLCCFNNIAGNLPNAKEELELTRNSVKERVEEAIMRTEKIEPAVEKWLKDVEKVLEEEHMLQERISEVSKSYFRRQFQYFLTKKIARKIEKMAQLNHNSKFEPFSKIAELPGMKYYSSKDFVLFKSRESAYKKLLEALKDKSVSMIGLVGLGGSGKTTLAKEVGKKAEELKLFEKVVMTTVSQTPNIRSIQVQIADKLGLKFVEESEEGRAQRLSERLRTGTTLLILDDLWEKLEFEAIGIPSNENNKGCGVILTTRSREVCISLQCQTIIELNLLAGDEAWDLFKLNANITDDSPYASKGVAPKIVDECRGLPIAIVTVGSTLKGKTVKEWELALSRLKDSEPLDIPKGLRSPYACLGLSYDNLTNELAKSLF…
HK_NBARC_NBARC.Chr14.15	Chr14	TGFam.ISGAP	46672338	46678005	ATGGGGGAGATCGTTGTTTCCATCATAGCAAAGATTGCAGAATATACAGTGGGTCCAATTTTACACCATGCTCGATACTTGTGTTGTTTCAACAACTTTGCTGGGAATCTTCCAAATGCAAAAGAAGATTTGGAATTGACTCGAGACAGTGTAAAGAAACGAGTAAGAGAAGCCACTAACAGGACTGAAAAAATCGAACCAGCAGTTGAGAAGTGGCTGAAAGATGTTGAGAAAGTCTTACAAGAAGTGCAGACACTAGAAGGAAGGATTTTGGAAGTACGCAAAAGTATTTTCCGAAGTCAATGCCAATATTTCCTTGCAAAAGAAATCGCAAGAAAAATAGAAAAAATGACTCAGCTCAATCGTGATAGCAAGTTTGACCCATTTTCTAGCAAGACT…	MGEIVVSIIAKIAEYTVGPILHHARYLCCFNNFAGNLPNAKEDLELTRDSVKKRVREATNRTEKIEPAVEKWLKDVEKVLQEVQTLEGRILEVRKSIFRSQCQYFLAKEIARKIEKMTQLNRDSKFDPFSSKTELPGMKYHSFEDFVPFKSTESTYNEILEELSDKSFIMIGLHGMGGSGKTTLVKEVGKKVEELKLFEKVVMAVVSQTPNIRSIQEQIADKLGLKFEENSEEGRAQRLSKRLSEGKTLLILDDVWEKLNFEAIGIPFNENNKGCGVLLTTRSREVCTSMQCQSIIELHLLTDEEAWDLFQFYAKITDDSSAALKGVATKIVNQCKGLPIAIVTLGSTLRGKTLEEWELALLRLEDSKPLDIPKGLTSPHVCLRSSYDNLTNQLAKSLL…
HK_NBARC_NBARC.Chr14.16	Chr14	TGFam.AUG	46685437	46699538	ATGGTAGAATATGCAGTAGATCCAATTTTACACCATGCTGGATACTTGTGTTGTTTCAACAACTTTGCTAGGAATCTTAGAAAAGCCAAAGAAGAATTGGAATTGACCCAAGACAACATGAAGAAACAAGTTAGAGAAGCCACTAAAAGGAATGAAAAAATTGAGCCAATGGTTGAAAAGTGGCTTAAAGATGCTGAGAAAGTCCTAGAAGAAGTACAACTGCTGGAAGGAAGAATTTCAGAAGTAAGCAAGTGCTATTTCAGTAGGAGATGCCAATATTTTCTAGCAAAAGAAATAGCAAGAAAAACAGAGAAAATGACTCAACTCAATGGTAACATCAAGTTTGAGCCATTTTCTAGGCTTACCGAACTTCAAGGCATGAAGTACTATTCTTCCAAA…	MVEYAVDPILHHAGYLCCFNNFARNLRKAKEELELTQDNMKKQVREATKRNEKIEPMVEKWLKDAEKVLEEVQLLEGRISEVSKCYFSRRCQYFLAKEIARKTEKMTQLNGNIKFEPFSRLTELQGMKYYSSKNFVLFKSIESTYNKLLEALKDKSVCMIGLCGIGGSGKTTLTKEVGKKAEDLQLFEKVVMVTVSQTPNIRSIQEQIADQLDFKLREDSNIGKARRLSERLRKGTTLVILDGVWGKLDFEAIGIPLNENNKGCEVLLTTRSRQVCTSMQCQSIIELNLLTGEEPWALFKLHANITDDSLDALKVVARNIVNECKGLPIAIVTVGSTLRGKTFEEWESALSRLEDSIPLDIPNGLTSPHVCLKLSYDNLTNQFAKSLLLLCSIFPENHE…
HK_NBARC_NBARC.Chr15.1	Chr15	TGFam.ISGAP	2033394	2037547	ATGGAAACTTCTTCTAGTTCCCAAGATCCTCGAATCAAATATGATGTCTTCATCAGCTTTAGAGGCACAGACGTACGGTGTGGTTTTCTTAGCCATTTGAAGAAGGAACTGCGCCAGAAGCAAGTTGATGCCTTTGTTGATGACAGGCTTGAAGGAGGGGATGAGATATCACACTCACTTGACAAAGCCATTGAAGGATCACTTATTTCTTTGGTCATATTCTCCAAAGACTATGCTTCTTCAAAGTGGTGCTTGGAAGAGGTTGTGAAAATAATTGAGTGCATGCACAGTAATAAACAGATTGTGATTCCTGTTTTCTACAACGTAGATCCATCAGACGTACGGCACCAAAAAGGGACTTATGGAGATGCATTTGCTAAGCACGAAAAAAATAAAAGA…	METSSSSQDPRIKYDVFISFRGTDVRCGFLSHLKKELRQKQVDAFVDDRLEGGDEISHSLDKAIEGSLISLVIFSKDYASSKWCLEEVVKIIECMHSNKQIVIPVFYNVDPSDVRHQKGTYGDAFAKHEKNKRNLAKVPNWRCALNIAANLSGFHSSKFVDEVELIEEIAKCLSSKLNLMYQSELTELVGIEERIADLESLLCLGSTIVGVRVIGIWGMGGIGKTTIAAAVYNRLYFEYEGCCFMANITEESEKHGMIYVKNKIISILLKENDLQIGTPNGVPPYVKRRLIRKKVLVVLDDINDSEQLENLVGALDWFGSGSRIIVTTRDKGVLGKKADIVYEAKALNSDEAIKLFMLNAFKQSCLEMEWIELSRRVIQYANGNPLALKVLGSFLYGKS…
HK_NBARC_NBARC.Chr15.2	Chr15	TGFam.AUG	9954829	9968956	ATGAGCTTGGGGGTCAAGATATTTCAACATCATTGTCAACTTCAATGCATGCTAATATTTCTTAGATCTTGTTTTGTATTTGAAAGATTTTTTCACCTTTTCCAGATAGATGATGGTTCTCCAAACAATGAACAACTACTTGAGGTTGAGGATGAGGGCAATGAGCTTGAGAATGAATGTGGGCAATTGTTTGAGATTGATGGAAGTGAACCTGAAAATGGGAGGGATGAAACAACAATAGTTGATAGTCATAGTGGAGAATCTCAAGGGAAAGACTGCCCTCCGCCAGTTGTGAGAATGGAGTTTGATACCTATGATGATGCCTACAACTATTACAATACCTATGCCAAGGATATTGGATTTGCTATTCGGGTTAAATCTTCGTGGACCAAACGCAAC…	MSLGVKIFQHHCQLQCMLIFLRSCFVFERFFHLFQIDDGSPNNEQLLEVEDEGNELENECGQLFEIDGSEPENGRDETTIVDSHSGESQGKDCPPPVVRMEFDTYDDAYNYYNTYAKDIGFAIRVKSSWTKRNSKEKRGAVLCCNCEGFKTTKEANSHRKETRTGCLAMIRLRLVDSNRWRVDEVKLDHNHSFDPERAQNSKSHKRMDSRAKRKVEPTLDVEVRTIKLYRMPVVDASGYGSSNSTEGGTSNISCSRRLKLKKGDPELISNYFCRIQLMNPNFFYVMDLNDDGQLRNVFWIDSRSRAAYSYFGDVVAFDSTCLSNNYEIPLVAFVGVNHHGKSILLGCGLLADETFETYIWLFRAWLTCMTGRPPQTIITNQCKAMQSAIAEVFPRAHHR…
HK_NBARC_NBARC.Chr15.3	Chr15	TGFam.ISGAP	10070072	10073089	ATGGCTGAGTTTGTCCTTGAAACTGTGCTTAGGAATTTGAACTCACTTGTTCAAAAGGAGTTGGCACTATTTCTGGGTTTTGATCAAGACTTGGAAAGGCTTACCACCTTGTTCACTACAATCAAGGCTACGCTTGAAGATGCTGAGGAGAAACAATTCTCAGACAGAGCTATGAAAAATTGGCTGGGAAAGCTAAAAGATGCAGCTCTCATCCTTGATGACATCATTGACGAGTGTGCCTATGAAGGATTGGCGTTCGAGAACCAAGGGATCAAGTCTGGTCCATCAGACAAGGTACAAGGCTCTTGCTTATCCTCTTTTCATCCAAAACGTGTTGTTTTCCGTTACAAAATTGCTAAGAAAATGAAAGCGATAAGTGAGAGATTAACTGAAATTGCT…	MAEFVLETVLRNLNSLVQKELALFLGFDQDLERLTTLFTTIKATLEDAEEKQFSDRAMKNWLGKLKDAALILDDIIDECAYEGLAFENQGIKSGPSDKVQGSCLSSFHPKRVVFRYKIAKKMKAISERLTEIAEERKMFHLTEMVRKRRSGVLELRQTGSSITETQVFGREEDKNKILDFLIGDATHSEELSVYPIAGVGGLGKTTLAQLIFNHERVFNHFELRMWVCVSYFSLKRVTKAIIEAAGNTCEDLDLQSQQRRLHDLLQRKRYLLVLDDVWDDNQENWQRLKSVLACGAKGTSILVTTRLSKVAAIMGTLTPHELPVLSDNDCWELFKHQAFGLNEEEHVELEDTGKEIVKKCRGMPLAAKALGGLLRFKRNKNEWLNVKESNLLELSHNEN…
HK_NBARC_NBARC.Chr15.4	Chr15	TGFam.ISGAP	10080162	10083191	ATGGCTGAGTTTGTCCTTGAAACTTTGCTTGGCAATTTGAAGTCACTTGTTCAAAAGGAGTTGCTACTATTTCTTGGTTTTGATCAAGACTTGGAAAGACTTTCCAGCTTGTTCACTGCAATCAAGGCAACGCTTGAAGATGCTGAGGAGAAACAATTCTCAAACAGAGCTATAAAAGATTGGCTGGAAAAGCTAAAACATGAAGCTCACATCCTGGATGACATCATTGACGAGTGTGCCTATGAAGTATTCGGGTTGGAGAACCAAGGGGTCAAGTGTGGTCCATCCAACAAGGTACAATGCTCTTGTTTATCCTCTTTTCATCCCAAGCGTGTTGTTTTCCGTTACAAAATTGCTAAGAAATTAAAAAGAATAAGTGAGAGATTAATGGAAATTGCT…	MAEFVLETLLGNLKSLVQKELLLFLGFDQDLERLSSLFTAIKATLEDAEEKQFSNRAIKDWLEKLKHEAHILDDIIDECAYEVFGLENQGVKCGPSNKVQCSCLSSFHPKRVVFRYKIAKKLKRISERLMEIAEERNKFHLVEMVREIRSGVLEWRQTTSLVIEPKVYGREEDKDKILDFLIGDASHFEDLFVYPITGLGGLGKTTLAQFIFNDEKVVNHFELRIWVCVSEDFSLERMTKAIIEATSGVACKDLDIGSKQKRLQTMLQRKRYLLVLDDVWDDKQENWQRLKSVLACGAKGASILVTTRQSKVAAIMGTIAPHELSVLPNKYCWELFKHQAFGPNEEEQVELEDIGKEIVKKCRGMPLAAKALGGLLRFKRNKNEWLNVKESNLLELSQN…
HK_NBARC_NBARC.Chr15.5	Chr15	TGFam.ISGAP	12699298	12704153	ATGTTGTATTTTTTTGTCTCTTGCTTATTTCGTTGTGTGTTGTTTTTCTCTAAGATATTCTGGAAATTCAGTGTGTTGTTGTATTTTCTTGTCTCCTGTTTACTTCGTTGTGTGTTGTTTTTCTCTAAGATGTTATGGAAATTGAATATGGCATATTTTTTTGTCTTTTGTTTATTTTGTTTTGGGTTGTTTTTCTTTGTCTGTTGGTTACTTCAAAAGCTTAGTGATCGTGTAGTTGAAAAACCCGTGTCTGAGGACAACAAAGCTCCTCAAACAAAGTATGATGTTTTTGTTAGTTTCAGGGGCAAGGACGTTCGTGGCAACTTTCTTAGCCATTTGGATGAAATTTTCAAAAGGAACAAAATATATGCCTTTGTGGATGATAAACTTAAGAAGGGA…	MLYFFVSCLFRCVLFFSKIFWKFSVLLYFLVSCLLRCVLFFSKMLWKLNMAYFFVFCLFCFGLFFFVCWLLQKLSDRVVEKPVSEDNKAPQTKYDVFVSFRGKDVRGNFLSHLDEIFKRNKIYAFVDDKLKKGDEIWSSLVEAIEQSFILLIIFSQSYASSRWCLKELEAILECNKKYGRIVIPVFYHVEPADVRHQRGTYKNAFKKHEKRNKTKVQIWRHALKKSANIVGIETSKIRNEVELLQEIVRLVLKRLGKSPINSKILIGIDEKIAYVESLIRKEPKVTCLIGIWGMAGNGKTTLAEEVFKKLQSEYDGCYFLANEREQSSRHGIDSLKKEIFSGLLENVMTIDDPNVSLIDIDRRIGRMKVLIVLDDVNDPDHLEKLLGTPDNFGSGSRII…
HK_NBARC_NBARC.Chr15.6	Chr15	TGFam.ISGAP	12708219	12712343	ATGTTGTATTTTTTTGTCTCTTGCTTATTTCGTTGTGTGTTGTTTTTCTCTAAGATATTCTGGAAATTCAGTGTGTTGTTGTATTTTCTTGTCTCCTGTTTACTTCGTTGTGTGTTGTTTTTCTCTAAGATGTTATGGAAATTGAATATGGCATATTTTTTTGTCTTTTGTTTATTGTGTTTTGGGTTGTTTTTCTTTGTCTGTTGGTTACTTCAAAAGCTTAGTGATCGTGTAGTTGAAAAACCCGTGTCTGAGGACAACAAAGCTCCTCAAACAAAGTATGATGTTTTTGTTAGTTTCAGGGGCAAGGACGTTCGTGGCAACTTTCTTAGCCATTTGATTGAAATTTTCAAAAGGAACAAAATAAATGCCTTTGTGGATGATAAACTTAAGCCGGGA…	MLYFFVSCLFRCVLFFSKIFWKFSVLLYFLVSCLLRCVLFFSKMLWKLNMAYFFVFCLLCFGLFFFVCWLLQKLSDRVVEKPVSEDNKAPQTKYDVFVSFRGKDVRGNFLSHLIEIFKRNKINAFVDDKLKPGDEIWSSLVEAIEQSFILLIIFSQSYASSPWCLEELEAILECNKKYGRIVIPVFYHVEPADVRHQRGTYKNAFKKHQKRNKNKVQIWRHALKKSANISGIETSKIRNEVELLQEIVRLVLERLGKSPINSKILIGIDEKIAYVELLIRKEPEATCLIGIWGMAGNGKTTLAEEVFKKLQSEYDGCYFLANEREQSSRHGIDSLKKEIFSGLLENVVTIDNPNVSLDIDRRIGRMKVLIVLDDVNDPDHLEKLLGTPDNFGSGSRIII…
HK_NBARC_NBARC.Chr15.7	Chr15	TGFam.ISGAP	13744646	13748673	ATGTCAGACAACAACTCTCCTGAAACAAAGTATGATGTTTTTGTTAGCTTCAGGGGCAAGGACATCCGTGACGGGTTTCTTAGCCATTTGACTGACACTTTTCTAAGGAAGAAAATAAATGTCTTTGTAGATGAGACAAATCTTAAAAAGGGAGATGAAATATGGCCATCACTTGCCGTAGCAATTGAAGTATCATCCATTTCATTGATCATATTCTCACAAGACTATGCTTCTTCGCGTTGGTGTTTAGAAGAACTTGTGAAAATACTCGAATGCAGAGAGAAATATGGACGAATTGTAATACCTATTTTCTACCACGTACAACCCAAAAATGTACGACATCAGTTGGGGAGTTACGAAAATATATTTGCTCAGCGTGGAAGAAAATACAAGACCAAG…	MSDNNSPETKYDVFVSFRGKDIRDGFLSHLTDTFLRKKINVFVDETNLKKGDEIWPSLAVAIEVSSISLIIFSQDYASSRWCLEELVKILECREKYGRIVIPIFYHVQPKNVRHQLGSYENIFAQRGRKYKTKVQIWKDALNISADLSGVESSRFQNDAELIQEIVNVVLNKLAKPSVNSKGIVGIDEEIANVELLISKEPKKTRLIGIWGMGGIGKSTLAEKVLNKLRSGFEGCYFLANEREQSNRHGLISLKEKIFSELLGYDVKIDTLYSLPEDIVRRISCMKVLLILDDVNDLDHLEKLLGTLDNFGSGSRIIVTTRDEQVLKANKVDEIYRLREFNHDKALEFFNLNTFNQSDDQREYSTLSEKVVDYARGIPLVLKVLAHLLRGRKKEIWESE…
HK_NBARC_NBARC.Chr15.8	Chr15	TGFam.PM	14007124	14021210	ATGGACACCCGTCTCCGTGTGATTGATGATCCCATGAATGAAGTTCAATGGCAGAATGGTGTAGAGGAAAAATCCATGTCAATCAACACTGCTCCTCAAATAAAGTTTGATGTATTTGTTAGCTTGAGGGGCAAGGACATACGGGACGGGTTTCTTAGCCATTTGACTGAGGCTTTTAAAAGAAACCAAGTACATGCTTTTGTAGATGATAAACTAGAGAGGGGAGAAGAAATATGGCCATCACTTGTGACAGCAATTGAACGTTCATTCATTTTGTTAATCATATTCTCGCAAGACTATGCTTCTTCTCGTTGGTGTTTAGAAGAAATTGTGACGATATTAGAATGCAGAGATAAATATGAGCGGATTGTAATCCCTGTTTTCTACAAAATGGAACCC…	MDTRLRVIDDPMNEVQWQNGVEEKSMSINTAPQIKFDVFVSLRGKDIRDGFLSHLTEAFKRNQVHAFVDDKLERGEEIWPSLVTAIERSFILLIIFSQDYASSRWCLEEIVTILECRDKYERIVIPVFYKMEPTNVQHQLGSYTKMHLLSMKEDTKARNDAEVVKEIVNLVLKRLAKPKIKSKGLYLTIKESPLRKEKNEGNFLPCLLTPPPQTKPFKIIELVLTALILTYTISLNDAAVVKEIVNLVLKTLVKPHVISKGLVGIEEKITTIESWIREKATDISLIGIWGMGGIGKTTLAEQVFNKLHSEYKGSYFLAREREESKRHEIISLKEKFFSGLLGYDVKICTPSSLPEDIVKRIGCMKVLIVIDDVNDLDHLEKLFGTLDNFGSEVYEVMKL…
HK_NBARC_NBARC.Chr15.9	Chr15	TGFam.ISGAP	15017430	15021018	ATGGCTCAGGCTATAGTGAACTTCATAGTGCAAAGTCTTGGTGATTTGCTCATTCAAGAAGCAGTGTTCCTATATGGGGTGGAAGACAAAGTGTTGCAGCTGCAAACTGAATTGAGGATGATGAGGTCTTACTTGCAAGATGCAGATAGAAAGCAAGATGGTAATGAAAGGCTAAGGAATTGTATTTCAGAAATCAGAGAAGCTGCTTATGATTCTGATGATGTCATTGAGTCATATGCCCTCAGAGGAGCTTCAAGAAGAAATTTGACTGGTGTTTTGAGCCTCATCAAAAGGTATGCTTTAAACATCAACAAATTCATAGAAACCCACAAGGTGGGATCTCATGTTGATAATGTCATAGCTAGGATTTCTAGCCTCACAAGGAGTTTGGAAACTTAT…	MAQAIVNFIVQSLGDLLIQEAVFLYGVEDKVLQLQTELRMMRSYLQDADRKQDGNERLRNCISEIREAAYDSDDVIESYALRGASRRNLTGVLSLIKRYALNINKFIETHKVGSHVDNVIARISSLTRSLETYGIRPEEGEASNSMHGKQRSLSSYSHVIEEDLIGVQDDVRILELCLVDPNKGYRVVAICGMGGLGKTTLAKKVYHSLDVKSNFESLAWAYVSQHCQARDVWEGILFQLISPSQEQRQEIVNMRDEELARTLYQVQEEKSCLVVLDDIWSVDTWRKLSPAFPNGISPPVVGSKIVLTTRNIDVPLKMDPSCYLHKPKCLNEHDSWELFQKKAFPKIDDPDYIQKQNLGREMVGRCGGLPLAIIVLGGLLASKTKFYDWDTVYKNINSY…
HK_NBARC_NBARC.Chr15.10	Chr15	TGFam.PM	18238863	18241593	ATGCTTAGAAGAAAACTGCTAAGGTATCCGGGATTGTGTCGTCAAATCGACATCTGTCTTACTGGATTATGGGGTATGGGAGGTATTGGCAAGACAATCCTTGCGGAAAAAGTATTCATTAAACTACGGTCTGAATATGATGATTGTTTATTTTTAGCTAATGAAAGAGAACAATCAAGGAAACATGGGATAATTTCTTTGAAGGAAAAAGTTTTTTCAGAACTACTAGGAAATGTTGTTAAAATTGACACACCAAATTCGTTGCCCAATGATATTGTTAGAATTGGTCGAATGAAAGTTCTTATTGTTCTTGATGATGTGAATGATTCAAATCACCTAGAAAAATTACTGAGAACTCTTGATAATTTTGGATCAGATAGTAGAATCATTGTAACAACT…	MLRRKLLRYPGLCRQIDICLTGLWGMGGIGKTILAEKVFIKLRSEYDDCLFLANEREQSRKHGIISLKEKVFSELLGNVVKIDTPNSLPNDIVRIGRMKVLIVLDDVNDSNHLEKLLRTLDNFGSDSRIIVTTRDKQILEANKADEIYLLREFSFNQALELFNLNAFNQCHDQREYDNLSKAMVNYAKGIPLVMTMHDSLQEKERTVVCRESSKNGSHGRLWDPDDIHEEMKNDKNLTQEYADMDKENPAYAAWEYQDQSLLVWLQSSLSEAILSKVVGCVHAHQVWENIDNHFHAKTKEKSRYLHMELRNTRKGEHSIGEFLTRIKTIVDSLLAIGQTISIQEQIDVILEGLPIEYESLVTAISNKID*
HK_NBARC_NBARC.Chr15.11	Chr15	TGFam.PM	19320890	19323922	ATGGCTGAGTTTGTCATCGAAACTTTGTTAGGGAATTTGAACTCACTTGTTCAAAAGGAGTTGCAACCATTTCTTGGTTTTGATCAAGACTTGGAAAGGCTTTCCGGCTTGTTAACTACAATCAAGGCTACACTTGAAGATGCTGAGGAGAAACAATTCTCAAACAAAGATATAAAAGATTGGTTGGGAAAGCTAAAACATGCAGCTCACAACCTGGATGACATCATTGATGAGTGTGCCTATGAAGTAATGAGGTTGGAGTACGAAGGGGTCAAGTGTGGTCCATTAAACAAGCTACAATGCTATTGCTTATCCTCTTTTCATCCCAAGCGTGTTGTTTTTCATTACAAAATTTCTAAGAAAATGAAAAGAATAAGTGAGAGATTAAGGGAAATTGAT…	MAEFVIETLLGNLNSLVQKELQPFLGFDQDLERLSGLLTTIKATLEDAEEKQFSNKDIKDWLGKLKHAAHNLDDIIDECAYEVMRLEYEGVKCGPLNKLQCYCLSSFHPKRVVFHYKISKKMKRISERLREIDEERTKFPLIEMVHERRRRVLEWRQTVSRVTEPKVYGREEDKDKILDFLIGDASHFEYLSVYPITGLGGLGKTTLAQFIFNHKRVINHFELRIWVCVSEDFSLERMMKAIIEAASGHACTDLDLGSQQRRIHDMLQRKRYLLVLDDVWDDKQENWERLKSVLSCGAKGASILVTTRQSKVATILGTVCPHELPILPDKYCWELFKQQAFGPNEEAQVELADVGKEIVKKCQGVPLAAKALGGLLRFKRNKNEWLNVKDSKLLELPHN…
HK_NBARC_NBARC.Chr15.12	Chr15	TGFam.PM	35966124	35971514	ATGCCTGTAGGAGAAGCATTTTTGTCAGCTTTCCTTCAAGTTTTGTTTGACAGGCTGGCCTCAAAGAATGTTATAGAGGTTATTCTTGCAGGAGACAAAAGCAAAATCCTAAAGAAATTTCAGAAGACTTTGCTGCTCCTCAAAGCAGTACTTAATGATGCAGAAGACAACCATTTAAAGAATGAGGCTGTGAGAATGTGGCTAGTTGAGCTTAAAGATGTTGCTTTTGATGCAGAAGATGTTCTAGATAGGTTTGCTACTGAAGTATTGAAGAGGAGGTTGGAATCGATGTCTCAATCTCAGGTTCAAACCACCTTTGCTCATGTATGGAATCTTTTCCCAACTTCTCTCAGCTCAAGTATGGAATCTAACATGAAGGCGATCACTGAGAGACTGGCG…	MPVGEAFLSAFLQVLFDRLASKNVIEVILAGDKSKILKKFQKTLLLLKAVLNDAEDNHLKNEAVRMWLVELKDVAFDAEDVLDRFATEVLKRRLESMSQSQVQTTFAHVWNLFPTSLSSSMESNMKAITERLATLANERHELGLSEVAAGCSYKINETSSMVNESYIHGRDNDKKKIIQFLMENRPSHGDEVLVIPIVGMPGIGKTTLAQVVFNDDEVNTHFELKAWVSVPYDFDVKVVTRKILESVTCVTCDFNNLHQLQVKLRAVLSGKKFLIVLDDVWNKNYNEWIKLVAPFRGAARGSSVIVTTRSAEVANMMGTVESHHVNQLSDKDCWSVFVQHAFRSKTIDANQAFAEIGKKIAEKCKGSPLMATTFGGILSSQKDARDWENVMDFEIWDLA…
HK_NBARC_NBARC.Chr15.13	Chr15	TGFam.PM	36140966	36144667	ATGCCAGTACTAGAAACCCTTGGTGGTGCTCTTTTCGGTGCTGTCCTTCAGGTGCTGTTGGACAAGTTGGATTCTTGTCATGTTTTGGACTACTTTCGTGGACGAAAGCTCGATGAGAAGCTGCTGTACAAGTTGAAGGCAACGCTTCGGTCCATCGATGCTGTGGTTGATGATGCAGAACAAAAGCAGTACAGCTATTCACGGGTGAGAGAGTGGCTTCTTGAGGTCAAACAAGCTGTGCTTGATGCTGAGGATCTCCTCGATGAAATAGACTGTAAAGCTTTGAAATACAAGCTGGAAGATGACTCTCAAACCACTACTAGCAAGGTGAGGAATTTATTAAATGTTTTTTCTCTCAGTTCCATTGACAAGGAAATTGAATCAAGAATGAAACAACTA…	MPVLETLGGALFGAVLQVLLDKLDSCHVLDYFRGRKLDEKLLYKLKATLRSIDAVVDDAEQKQYSYSRVREWLLEVKQAVLDAEDLLDEIDCKALKYKLEDDSQTTTSKVRNLLNVFSLSSIDKEIESRMKQLLDLLELLASQKSDLGLKNACDVGIGSGLGSNVLKILPQTSLVAEDVIYGRDDEKEMILNWLTSDIDSRSQLSIFSVVGMGGLGKTTLAQHVYNDPQIEAKFAIKAWVYVSDDFDVLKVIKAIIGAINKSKGDSGDLEILHKYLKDELTGKKFFLVLDDVWNEDRDQWKALKTPLKYGAQGSKILVTTRSNNVASTMQSNKVCQLKTLQEDHSWQVFAKNAFQDDSLQLNVELKEIGTKIVEKCKGLPLALETVGCLLRTKRSSVSE…
HK_NBARC_NBARC.Chr15.14	Chr15	TGFam.AUG	37762257	37764592	ATGAAGAAAAAGCAATTCAGAGATGCACGTGTGAGAGATTGGCTTCTTAAGGCCAAAGATGTCGTGTTTGAAGCAGAGGATCTCTGGGAAGATATGGACAATGAACTCGATCATCTAGGTTTGAAAAAGGCTAGTGGTGTTGTGGTTGGATCAGGATCGGGTAGTAAAGTGTCAGAGAAATTGTCATCAACATCTTTGTTAAGTGAAAGTATTATTTATGGAAGAGATGATGACAAAGAAATTATCTTTAACTGGCTCATATCTGACATTGACAACAAGCTATCTATACTTTCTATTGTGGGCATGGGCAGGTTGGGTATGACCATGGTTGCCCAACACGTATACAATGACCCAAGGATGGATGATAAATTTGATATTAAAGCTTGGGTCTGTGTTTCA…	MKKKQFRDARVRDWLLKAKDVVFEAEDLWEDMDNELDHLGLKKASGVVVGSGSGSKVSEKLSSTSLLSESIIYGRDDDKEIIFNWLISDIDNKLSILSIVGMGRLGMTMVAQHVYNDPRMDDKFDIKAWVCVSEDFDVFNVSRAILDTISGSTDRSRELEMVQTRLKEKLTIIRLLYHAVRRAPPGGITRRLLLALFAKHAFQSSNPQANIDFKEIDMKIVEKCKGLPLALKTMGSLLHNKSSVREWENIFKSYEFDKECLIQLWMAENFLQSTQQRKTPEENIENPSDALEADLKNKTHLVELDLQRGCNWGLCWCNRKPDNADSNEMRLSLELVDHSYNSIAGSCWSCFRN*
HK_NBARC_NBARC.Chr15.15	Chr15	TGFam.ISGAP	37823064	37826864	ATGGCATTATTAGAATGCGTTGGTGGTGCTTTTCTTTCTTCTTTCCTCGGGACTGTATTTCAGAAGCTGGCTTCTCCTCAAGTTCTGGATTTCTTTCGTGGAACAAAGATCGATCAGAAGCTGCGGAAGGACTTAGAAAACAAGCTCTTCTCCATCCAAGCTGTGCTTGATGATGCTGAACAAAAACAGTTTGGAAATATGCAAGTGAGAGACTGGCTTATTAAGCTCAAAGTGGCCATGCTTGACGTTGAAGATGTCTTGGATGAAATACAACACTCCAGACTTCAAGTTCAACCTCAATCTGAATCTCAAACCTGTACTTGCAAGGTACCTAATTTCTTTAAATCTTCCCCTGTTAGTTCCTTTAACAAGGAAATTAATTCCAGCATGAAAAACGTG…	MALLECVGGAFLSSFLGTVFQKLASPQVLDFFRGTKIDQKLRKDLENKLFSIQAVLDDAEQKQFGNMQVRDWLIKLKVAMLDVEDVLDEIQHSRLQVQPQSESQTCTCKVPNFFKSSPVSSFNKEINSSMKNVLDDLDDLASRMDNLGLKKASGLVAGSGSGSGSGGKVPQSTSSVVESDICGRDGDKEIIINWLTSDTDNKLSILSIVGMGGLGKTTLAQLVYNDPRIVSKFDVKAWICVSEEFDVFNVSRAILDTITDSTDHGRELEIVQRRLKEKLADKKFLLVLDDVWNESRSKWEAVQNALVCGAQGSRILVTTRSGKVSSTMGSKEHKLRLLQEDYCWKLFAKHAFRDDNLPRDPGCPEIGMKIVKKCKGLPLALKSMGSLLHSKPFAWEWEG…
HK_NBARC_NBARC.Chr15.16	Chr15	TGFam.PM	37834631	37847484	ATGGCATTAGAATGCGTTGGTGGTGCTATTCTTTCTTCTTTCCTCGGGGCTCTATTTCAGAAGCTGGCTTCTCCTCAAGTTCTGGATTTCTTTCGTGGAACAAAGATCGATCAGAAGCTGCGGAAGGACTTAGAAAACAAGCTCCTCTCCATCCAAGCTCTCAAAGTTGCCATGCTTGACGTAGAAGATGTCTTGGATGAAATACAACACTCCAAACTCCAAGTTCAACCTCAATCTGAATCTCAAACTGGTTCAGGCTGTACTTGCAAGGTACCCAAATTCTTCCAATCTTCCTCTTTTAGTTCCATTAACAAGGAAATTAATTCCAGCATGAAAAAAATCCTTGATGACCTAGATGATCTTGCAAGCCGGATGGATAATCTAGGTTTGAAAAAGGCT…	MALECVGGAILSSFLGALFQKLASPQVLDFFRGTKIDQKLRKDLENKLLSIQALKVAMLDVEDVLDEIQHSKLQVQPQSESQTGSGCTCKVPKFFQSSSFSSINKEINSSMKKILDDLDDLASRMDNLGLKKASDLVARSGSGGKVPQSTLLTTLAQLVYNDPRIEGKFIVKAWVCVSEEFDVLNVSRAILDTFTKSTENSDWLEIVHTKLKDKLRGNRFLLVLDDVWNESRPKWEVVQNALVCGAQGSRILVTTRSQKVASTMRSEQHHLQQLQEDYCWKLFAKHAFHDDNPQPNPGYNEIGMKIVEKCGGLPLALKSIGSLLQNKSFVSDWENILKSEIWEIEDSDIVPALAVSYHHLPPHLKTCFAYYTLFPKDYEFDKECLIQLWMAENFLHCHQ…
HK_NBARC_NBARC.Chr15.17	Chr15	TGFam.ISGAP	37900133	37903279	ATGGAACAAATCCTTGATGACCTGGATGATCTTGAAAGCCAAAGTGGCTATCTAGGTTTGACAAGGACTAGTGGTGTTGGGGTTGGATCAGGATCGGGTAGTAAAGTGTTAGAGAAATTGCCATCAGCATCTTCGGTGGTAGAAAGTGATATTTATGGCAGAGATGATGACAAAAAATTGATCTTCGACTGGATCAGTTCTGACACTGATGAAAAGCTATCAATACTTTCTATCGTGGGCATGGGCGGGTTGGGTAAGACCACGCTTGCCCAACTTGTATACAATGACCCAAGAATAGTGAGTAAGTTTGATGTCAAAGCTTGGATCTGTGTTTCAGAAGAATTTGATGTTTTCAACGTATCAAGAGCAATTCTTGACACGATTACTGATTCGACTGAT…	MEQILDDLDDLESQSGYLGLTRTSGVGVGSGSGSKVLEKLPSASSVVESDIYGRDDDKKLIFDWISSDTDEKLSILSIVGMGGLGKTTLAQLVYNDPRIVSKFDVKAWICVSEEFDVFNVSRAILDTITDSTDHSRELEIVQRRLKEKLADKKFLLVLDDVWNESRPKWEAVQNALVCGAQGSKILVTTRSEEVASTMRSKEHRLGQLQEDYCWQLFAKHAFRDDNLPRDPGCPEIGMKIVKKCKGLPLALKSMGSLLHNKPFSGEWESLLQSEIWELKDSDIVPALALSYHHLPPHLKTCFAYCALFPKDYVFDKECLIQLWMAENFLNCHQCSKSPEEVGQLYFNDLLSRSFFQQSSKYKEGFVMHDLLNDLAKYVCGDIYFRLGVDQAKSTQKTTR…
HK_NBARC_NBARC.Chr15.18	Chr15	TGFam.PM	37991843	37995354	ATGGCAGCAGAAATGGTTGATGGTGCTCTTGTTTCTACTTTCGTTCAGATGACAATTGACAGTTTGGCTTCTCGTTTTGTGGACTACTTTCGTCGAAGAAAACTCAATAAGAAGCTGCTGAGTAACTTGAAGGTGAAGCTACTAGCCATCGATGTTCTTGCTGATGATGCAGAACTTAAGCAGTTCAGAGATGCACGTGTCAGAGATTGGCTTTTTAAGGCCAAAGATGTAGTGTTTGAACTCTCCAAATGCCAAGTGGAAGCTGAATCCCAGTCCATTCGTAACAAGGTGTGGAATTTCTTCAAATCTTCTTCTGTTAGCTCCTTTGACAAGGAAATTGAATCAAGGATTGAACAAATCCTTGGTGACCTGGATGATCTTGAAAGCCGAAGTGGTTAT…	MAAEMVDGALVSTFVQMTIDSLASRFVDYFRRRKLNKKLLSNLKVKLLAIDVLADDAELKQFRDARVRDWLFKAKDVVFELSKCQVEAESQSIRNKVWNFFKSSSVSSFDKEIESRIEQILGDLDDLESRSGYLGLTRTSGDGVGSGSGRIVDDDKKLIFDWISSDTDEKLSILSIVGMGGLGKTTLAQLVYNDPRMESKFDDKAWICVSEEFNVLNISRAILDSLTDSTETSDQLEIVHTKLIDKLRGNKFFLVLDDVWNESQSKWKAVQNVGSLSRHAQLQEDYCRKLFAKHAFQGGNPQPNPECNEIGMKIVEKCRGLPLALKSMEGLLHNKSFVSDWENILKREIWEIEDADIDYVFDRECLIQLWMTENFLHCHQGSKSPEEVGQLYFNDLLSR…
HK_NBARC_NBARC.Chr15.19	Chr15	TGFam.AUG	38028213	38037620	ATGGTAGTGGTTGAAAGTGATATTTGTGGCAGAGATGCTGATAAAAAAATGATCATTAACTGGCTCACTTCTGACACTGATAACATGCTATCAATACTTTCTATTGTGGGCATGGGTGGGCTGGGTAAGACCACGCTTGCTCAACTTGTATACAACGACCCAAGGATAGAGGGCAAATTTATTGTTAAAGCTTGGGTCTGTGTCTCAGAGGAATTTGATGTTTTGAACGTATCAAGAGCAATTCTTGACACATTTACTAAATCAACTGAAAATAGTGATTGGCTAGAAATTGTTCATACAAAACTGAAAGACAAATTGAGAGGAAACAGATTTCTTCTCGTTTTGGATGACGTTTGGAACGAAAGCAGGCCTAAATGGGAAGTTGTGCAGAATGCTCTT…	MVVVESDICGRDADKKMIINWLTSDTDNMLSILSIVGMGGLGKTTLAQLVYNDPRIEGKFIVKAWVCVSEEFDVLNVSRAILDTFTKSTENSDWLEIVHTKLKDKLRGNRFLLVLDDVWNESRPKWEVVQNALVCGAQGSRILVTTRSQKVASTMRSEQHHLQQLQEDYCWKLFAKHAFHDDNPQPNPGYNEIGMKIVEKCGGLPLALKSIGSLLHNKSFVSDWENILKSEIWEIEDSDIVPALAVSYHHLPPHLKTCFAYYTLFPKDYEFDKECLIQLWMAENFLHCHQGSKSPEEVGQQYFNDLLSRSFFQQSSENKEVFFMHDVLNDLGKYVCGDIYFRLEVDQAKCTQKTACYFSVAMNNKQHFDEFGTLCDTKRLRTFMPTIRIMNEYYNSWHC…
HK_NBARC_NBARC.Chr15.20	Chr15	TGFam.ISGAP	38135390	38139088	ATGGCATTAGAATGCGTTGGTGGTGCTGTTCTTTCTTCTTTCCTCGCGGCTCTATTTCAGAAGCTGGCTTCTCCTCAAGTTCTGGATTTCTTTCGTGGAACAAAGATCGACCAGAACCTGCGGAGGGACTTAGAAAACAAGCTCCTCTCCATCCAAGCTGTGCTTGATGATGCTGAACAAAAACAGTTTGGAAATATGCCAGTGAGAGACTGGCTTATTGAGCTCAAAGTTGCCATGCTTGACGTAGAAGATGTCTTGGAGGAAATACAACATTCCAGACCTCAAGTTCAACCTCAATCTGAATCTCAAACCTGTACTTGCAAGGTACCCAAATTCTTCAAATCTTGCTCTTTTAGTTCCATTAACAAGGAAATTAATTCCAGCATGAAAAAAATCCTT…	MALECVGGAVLSSFLAALFQKLASPQVLDFFRGTKIDQNLRRDLENKLLSIQAVLDDAEQKQFGNMPVRDWLIELKVAMLDVEDVLEEIQHSRPQVQPQSESQTCTCKVPKFFKSCSFSSINKEINSSMKKILDDLDGLASRMDSLGLKKATDLVAGSGSGGNKLQSTSLVVESDICGRDGDKEMIINWLTSYTDEKLSILSIVGMGGLGKTTLAQLVYNDPRIVKLEIVQRRLKEKLADKKFLLVLDDVWNESRPKWEAVQNALVYGAQGSKILVTTRSEEVASTMRSKEHKLEQLQEDYCWQLFAKHAFRDDNLPRDPGCTDIGMKIVKKCKGLPLALKSMGSLLHNKPSAREWESVLQSEIWELKDSDIVPALALSYHHLPPHLKTCFAYCALFPK…
HK_NBARC_NBARC.Chr15.21	Chr15	TGFam.PM	38313153	38315046	ATGCAAAACCTTAGTCGCATGGACAAGCCAAAAACCATCACACACTACGTGTTGATAAGCTCCGCTGACGATACTGTCGCTGGTTTTACGAGCACTCTCGCCAAGTCCCTGGAAGATCAGGGATTCCCGGCGAGAGTGCTCGTGGACCACCGCGACCTGAAGAAAGCAGAGATTGAGACAGTGAGGGTGTTCATCGTTGTGTTGTCCGAACACTATGCAATTTGTCCGTTTCGGTTGGATAAGCTGGCCGAGATCGTGGATGGGTTAGGTGCCCGGCAGCGGGTTCTCCCGGTGTTCTACTATGTGCCCACGTCTGATGTGCGGTATCAGACTGGTAGCTATGAAGTAGCATTGGGTGTTCATGAGTACTATGTTGAACGTGAGAGGTTGGAGAAATGG…	MQNLSRMDKPKTITHYVLISSADDTVAGFTSTLAKSLEDQGFPARVLVDHRDLKKAEIETVRVFIVVLSEHYAICPFRLDKLAEIVDGLGARQRVLPVFYYVPTSDVRYQTGSYEVALGVHEYYVERERLEKWKNTLEKVAGFGGWPLQRTGKTYEYQYIEEIGRKVSEHVACSVELHSRVQKVNELLYSESDDGGVKMVGICGEDGTGKTTVACGVYYSNAAGNRFDYFCFLDKVGECLRNHGFIGLIGMLLSGMIGDSNNNSDIMKFGNTNKGMSILKRKFFEEEKKLFLVLEDIYDEKQLQDIVRLTNCFSSNSKVVITTKDNSLLHRHEIRLYEVERFKTKDAFQLLSLKAFNSKNLKSMYLSILERAETYASGNPFILEVMGSYLRGKSIEECV…
HK_NBARC_NBARC.Chr15.22	Chr15	TGFam.ISGAP	38334363	38336622	ATGCAAAGCTTTAGACGCTGGGTTGAGCCAAAAGCCTTCAGATACGACGTGTTCCTGAGCTTCAGGGGCTGGGATATCCGCTTCAGCTTCACCGGCTTCCTCTACAAGGGCCTCTTCGACCACGGATTCCGCACCTTCATGGACGACCGTGAGATCGACAAAGGCTCCCAAATCCCCCAAACCCTCCGCGAGGCGATCGAGGACTCTAGGGTTTTCATCGTCGTCCTCTCTGCCAACTTCGCCTCTTCCTCCTTCTGCCTGGACGAAGTTGTCCTCATCCTCCAAGAGTTCGCCAAGGGTAAGGGTCGCTGGATTTTGCCGGTTTTCTACTACGTGGATCCGTCTCATCTCGCTGATAGTGATTCCTATAAACGGGCATTGGAGGATCAGACCGAGTGG…	MQSFRRWVEPKAFRYDVFLSFRGWDIRFSFTGFLYKGLFDHGFRTFMDDREIDKGSQIPQTLREAIEDSRVFIVVLSANFASSSFCLDEVVLILQEFAKGKGRWILPVFYYVDPSHLADSDSYKRALEDQTEWFDSQRIQIWKTALSKLATFSGLRLIRNGSILEYQYIELILKEVSRHVTCPVGLSHRMSKVNKLLFSGSDVGVHMVGICGEARIGKTTVARGVYNFNSDTGFDHYCYFYNVGDILSQSRFVNEGMAILNQKKVFAIFEDINDSKQLKNIIELAYQFGSGSKVIITARNKGLLQSHGIESIYEVERFSKTEAFQLLILKAFNSISVSADYVTIFNRVETYALGHPWTLEVIGSNLSGKSVENCESALLKYESITNRDIRKILEESFNA…
HK_NBARC_NBARC.Chr15.23	Chr15	TGFam.ISGAP	38340526	38342460	ATGGCAGGTTCAGAACGCAGTAGTAGTAGGGTTTGGCACTACGAATTCGACGTTTTCCTCAGCTTTAGAGGAGAAGACACCAGGCTCGGTTTCGTTGGAAATCTCTACAAAGCTCTGACGGAAAAGGGATTCCATACCTTCTTTCGCGAGAAGCTTGTGAGAGGAGAAGAAATCGCAGCATCACCATCTGTGGTGGAAAAAGCAATTCAACATTCAAGAGTTTTTGTTGTAGTGTTCTCTCAGAACTACGCTTCTTCTACACGGTGCTTGGAGGAGCTTCTCAGTATCCTTCGGTTCTCCCAGGATAACCGTCGACCGGTTCTGCCGGTTTTCTATTACGTTGATCCCTCCGATGTGGGACTTCAGACGGGGATCTATGGAGAAGCGCTCGCTATGCAT…	MAGSERSSSRVWHYEFDVFLSFRGEDTRLGFVGNLYKALTEKGFHTFFREKLVRGEEIAASPSVVEKAIQHSRVFVVVFSQNYASSTRCLEELLSILRFSQDNRRPVLPVFYYVDPSDVGLQTGIYGEALAMHEKRFNSESDKVMKWRKALCEAAALSGWPFKHGDGYEYELIEKIVEGVSKKINRPVGLQYRMLELNGLLDAASLSGVHLIGIYGVGGIGKTTLARALYDSVAVQFDALCFLDEVRENAMKHGLVHLQQTILAETVGEKDIRLPSVKQGITLLKQRLQEKRVLLVLDDINESEQLKALVGSPGWFGPGSRVIITTRDRQLLESHGVEKIYEVENLADGEALELLCWKAFKTDKVYPDFINKIYRALTYASGLPLALEVIGSNLFGREI…
HK_NBARC_NBARC.Chr15.24	Chr15	TGFam.ISGAP	38359258	38362866	ATGGCATTAGAATGCGTTGGTGGTGCTGTTCTTTCTTCTTTCCTCGGGGCTCTATTTCAGAAGCTGGCTTCTCCTCAAGTTCTGGATTTCTTTCGTGGAACAAAGATCGACCAGATGCTGCGGAAGGACTTAGAAAACAAGCTCCTCTCCATCCAAGCTGTGCTTGATGATGCTGAACAAAAACAGTTTGGAAATATGCCAGTGAGAGACTGGCTTATTAAGCTCAAAGTTGCCATGCTTGACGTTGAAGATGTCTTGGATGAAATACAACACTCCAGACTCCAAGTTCAACCTCAATCTGAATCTCAAACCTGTACTTGCAAGGTACCCAATTTCTTCAAATCTTCCCCTGTTACTTCCTTTAACAAGGAAATTAATTCCAGCATGAAAAATGTCCTT…	MALECVGGAVLSSFLGALFQKLASPQVLDFFRGTKIDQMLRKDLENKLLSIQAVLDDAEQKQFGNMPVRDWLIKLKVAMLDVEDVLDEIQHSRLQVQPQSESQTCTCKVPNFFKSSPVTSFNKEINSSMKNVLDDLDDLASRMDNLGLKKPSDLVVGSGSGGKVPQSTSLVVESDICGRDDDKEIIINWLTSNTDNKLSILSIVGMGGLGKTTLAQLVYNDPRIVSKFDVKAWICVSEEFDVFNVSRAILDTITDSTDHGRELEIVQRRLKEKLADKKFLLVLDDVWNESRPKWEAVQNALVYGAQGSKILVTTRSEEVASTMGSEQHKLEQLQEDYCWELFAKHAFRDDNLPRDPVCTDIGKKIVKKCKGLPLALKSMGSLLHNKPFAWEWESVFQSE…
HK_NBARC_NBARC.Chr15.25	Chr15	TGFam.ISGAP	38411756	38415868	ATGGCAGCAGAAATGGTTGCTGGTGCTCTTGTTTCTACTTTCGTTGAGAAGACAATTGACAGTTTGGCTTCTCGTTTTGTGGACTACTTTCGTGGAAGAAAACTCAATAAGAAGCTGCTGAGCAAAATCAAGGTGAAGCTACTAGCCATCGATGTTCTTGCTGATGATGCTGAACTTAAGCAGTTCAGAGATGCTCGTGTCAGAGATTGGCTTTTTAAGGCCAAAGATGTAGTGTTTGAAGCAGAGGATCTCTTGGCTGATATAGACTATGAACTCTCCAAATGCCAAGTAGAAGCTGAATCCCAGCCCATTCTTAACCAGGTGAGCAATTTCTTCAGACCTTCTTCTTTGAGCTCTTTTGACAAGGAAATTGAATCAAGGATGGAACAAATCCTTGAA…	MAAEMVAGALVSTFVEKTIDSLASRFVDYFRGRKLNKKLLSKIKVKLLAIDVLADDAELKQFRDARVRDWLFKAKDVVFEAEDLLADIDYELSKCQVEAESQPILNQVSNFFRPSSLSSFDKEIESRMEQILEDLDDLESRGGYLGLTRTSGVGVGSGSGSKVLEKLPSTSSVVESDIYGRDDDKKLILDWITSDTDEKLSILSIVGMGGLGKTTLAQLVYNDPRIVSKFDVKAWICVSEEFDVFNVSRAILDTITDSTDDGRELEIVQRRLKEKLADKKFLLVLDDVWNESRPKWEAVLNALVCGAQGSRILVTTRSEEVASAMRSKEHKLEQLQEDYCWQLFAKHAFRDDNLPRDPGCPVIGRKIVKKCKGLPLALKSMGSLLHNKPFAWEWESVFQ…
HK_NBARC_NBARC.Chr15.26	Chr15	TGFam.ISGAP	38427248	38430812	ATGGCATTAGAATGCGTTGGTGGTGCTGTTCTTTCTTCTTTCCTCGGGGCTCTATTTCAGAAGCTGGCTTCTCCTCAAGTTCTGGATTTCTTTCGTGGAACAAAGATCGACCAGAACCTGCGGAGGGACTTAGAAAACAAGCTCCTCTCCATCCAAGCTGTGCTTGATGATGCTGAACAAAAACAGTTTGGAAATATGCCAGTGAGAGACTGGCTTATTGAGCTCAAAGTTGCCATGCTTGACGTTGAAGATGTCTTGGATGAAATACAACACTCCAGACTCCAAGTGCAACCTCAATCTGAATCTCAAACCTGTACTTGCAAGGTACCCAATTTCTTCAAATCTTCCCCTGTTACTTCCTTTAACAAGGAAATCAATTCCAGCATGAAAAATGTCCTT…	MALECVGGAVLSSFLGALFQKLASPQVLDFFRGTKIDQNLRRDLENKLLSIQAVLDDAEQKQFGNMPVRDWLIELKVAMLDVEDVLDEIQHSRLQVQPQSESQTCTCKVPNFFKSSPVTSFNKEINSSMKNVLDDLDDLASRMDNLGLKKPSDLVVGSGSGGKVPQSTSLVVESDICGRDGDKEIIINWLTSNTDNKPSILSIVGMGGLGKTTLAQLVYNDPRIVSKFDVKAWICVSEEFDVFNVSRAILDTITDSTDHGRELEIVQRRLKEKLADKKFLLVLDDVWNESRPKWEAVQNALVCGAQGSRILVTTRSEEVASTMRSEKHMLGQLQEDDCWQLFAKHAFRDDNLPRDPVCTDIGMKIVKKCKRLPLALKSMGSLLHNKPSAWEWESVLKSQ…
HK_NBARC_NBARC.Chr15.27	Chr15	TGFam.AUG	38497235	38499995	ATGGCATTAGAATGCGTTGGTGGTGCTGTTCTTTCTTCTTTCCTCGGGGCTGTATTTCAGAAGCTGGCTTCTCCTCAAGTTCTGGATTTCTTTCGTGGAACAAAGATCGATCAGAAGCTGCGGAAGGACTTGGAAAACAAGCTCCTCTCCATCCAAGCTGTGCTTGATGATGCTGAACAAAAACAGTTTGGAAATATGCAAGTGAGAGACTGGCTTATTAAGCTCAAAGTTGCCATGCTTGACGTTGAAGATGTCTTGGATGAAATACAACACTCCAGACTCCAAGTTCAACCTCAATCTGAATCTCAAACCTGTACTTGCAAGCTACCCAATTTCTTCAAATCTTCCCCTCTTAGTTCCTTTAACAAGGAAATTAATTCCAACATGAAAAATGTCCTT…	MALECVGGAVLSSFLGAVFQKLASPQVLDFFRGTKIDQKLRKDLENKLLSIQAVLDDAEQKQFGNMQVRDWLIKLKVAMLDVEDVLDEIQHSRLQVQPQSESQTCTCKLPNFFKSSPLSSFNKEINSNMKNVLDDLDDLASRMDNLGLKKASDLVVGSGSGGKVPQSKSSVVESDICCRDADKEMIINWLTSDTDNMLSILSIWGMGGLGKTTLAQNFRPKWEAVQNALVCGAQGSRILVTTSSEKFASTMRSKEHELEQLQEDYCWKLFAKHAFRDDNLPRDPGCPEIGMKIVKKCQGLPLVLKSMGSLLHNKSFVSDWENILKSEIWEIEDSDIVPALALSYHHLPPHLKTCFAYCALFPKDYVFHRECLIQLWMAEKFLNCHQGNKSPEEVGQQYF…
HK_NBARC_NBARC.Chr15.28	Chr15	TGFam.ISGAP	38551931	38555545	ATGGCATTAGAATGCGTTGGTGGTGCTGTTCTTTCTTCTATCCTCGGTGCTCTATTTCAGAAGCTAGCTTCTCCTCAAGTTCTGGATTTCTTTCGTGGAACAAAGATCGATCAGAAGCTGCGGAAGGACTTGGAAAACAAGCTCCTCTCCATCCAAGCTGTGCTTGATGATGCTGAAAAAAAACAGTTTGGAAATATGCAAGTGAGAGACTGGCTTATTAAGCTCAAAGTTGCCATGCTTGACGTTGAAGATGTCTTGGATGAAATACAACACTCCAGACTCCAAGTTCAACCTCAATCTGAATCTCAAACCTGTACTTGCAAGGTACCCAATTTCTTCAAATCTTCCCCTGTTACTTCCTTTAACAAGGAAATTAATTCCAGCATGAAAAATGTCCTT…	MALECVGGAVLSSILGALFQKLASPQVLDFFRGTKIDQKLRKDLENKLLSIQAVLDDAEKKQFGNMQVRDWLIKLKVAMLDVEDVLDEIQHSRLQVQPQSESQTCTCKVPNFFKSSPVTSFNKEINSSMKNVLDDLDDLASRMDNLGLKKPSDLVVGSGSGGKVPQSTSLVVESDICGRDGDKEIIINWLTSNTDNKLSILTIVGMGGLGKTTLAQLVYNDPRIVSKFDVKAWICVSEEFDVFNVSRAILDTITDSTDHGRELEIVQRRLKENLADKKFLLVLDDVWNESRPKWEAVQNALVCGAQGSRILVTTRSEEVASTMRSEKHRLGQLQEDYCWQLFAKHAFRDDNLPRDPVCSDIGMKILKKCKRLPLALKSMGSLLHNKPAWEWESVLKSEI…
HK_NBARC_NBARC.Chr15.29	Chr15	TGFam.PM	39147490	39149970	ATGACTACCAACCTTGTCGAGTGTATGAATTTTGTTTTGAAAGGAGAACGAGCATTACCTATTACTTCCAAAGTGAAGGAAACATTTCATAAAATAAATGATGTTTTTGTTACTAATGGGATGCACATACTTAATATGATAAAGGTGTGGCTTGATGAGGTAAAAAATGCAGTTTACGATGCAGAGGATCTCTTGGATGAGATTGACACTCAAGTCTCCAAATGCAACTGGAAGCTGAATCTAATTAGAATCAGACTTAGACATGCACTTGTAAGGCAATTGTCACGAAAATTGCCAACATCATCTTTGGTGGATGAAACTATTATATATGGTAGAGATGATGATAAAGAAATTATTTTTAATTGGCTTATCTGTGAACCAGAGAACGATAAGCCGTTA…	MTTNLVECMNFVLKGERALPITSKVKETFHKINDVFVTNGMHILNMIKVWLDEVKNAVYDAEDLLDEIDTQVSKCNWKLNLIRIRLRHALVRQLSRKLPTSSLVDETIIYGRDDDKEIIFNWLICEPENDKPLSIIFVVGMGGIGKTMLAQHLYNDPRMEGIFDNKAWVCISNELDVFKVTRAILEAITGSTNDGRDIKMLQVELKEKLFRTKFLLVLDDAWNENHMQWEALQTPFIYGARGSKILVTMCSMKVASTMQANNIHYLEQLQDDHCWQLFSRHAFQDENPQTNHKFKEIGTKIVEKCTGFPLALKTIGCLLYTKSSILEWESILTSEIWDLPKEDSDIIPALRLSYHHLPSHLKRCLAYCSIILKGFPFAKNHLCLLWMAEIVLQCP*
HK_NBARC_NBARC.Chr15.30	Chr15	TGFam.PM	41202677	41211155	ATGACAAAAGAGATTTTAGATGTCATAAAGAAAGCAAAATTTGATAATAGATTTTCTTACCGTGATGCCCCTGATGTCACAATTACACCATTAGAGCGAGGTTATGAAACACTGGAGTCCAGAACATCAATGCTGAATGAGATTAAGGAAATTCTTAAGGATCCTAAAATGTACGTGATTGGGGTGCATGGGATGGGTGGCGTGGGTAAAACCACTCTTGTGAATGAGTTAGCTTGGCAAGTAAAGAAAGATGGATTATTTGGTGCTGTAGCCATTGCCGATATAACGAATTCTCAAGATGTGAAAAAAATTCAAGGCCAAATTGCTGATGCGTTGGATTTGAAACTTGAAAAAGAGTCAGAAAGAGGAAGAGCAACAGAACTGCGTCAAAGGATAAAA…	MTKEILDVIKKAKFDNRFSYRDAPDVTITPLERGYETLESRTSMLNEIKEILKDPKMYVIGVHGMGGVGKTTLVNELAWQVKKDGLFGAVAIADITNSQDVKKIQGQIADALDLKLEKESERGRATELRQRIKKEEKVLIILDDIWSELNLTEVGIPFGDEHNGCKLVITSREREVLTKMNTKKYFNLTALLEEDSWNLFQKIAGNVVNEVSIKPIAEEVAKCCAGLPLLIAAVAKGLIQKEVHAWRVALTKLKKFKHKELENIVYPALKLSYDNLDTEELKSLFLFIGSFGLNEMLTEDLFICCWGWGFYGGVDKLMDARDTHYALINELRASSLLLEGELGWVRMHDVVRDVAKSIASESPPTDPTYPTYIELSNLEILSLAKSSFAELPGGIKHLT…
HK_NBARC_NBARC.Chr15.31	Chr15	TGFam.PM	41230706	41234553	ATGGATCCTAACATTTTCAAGATTGGGTTGTATGGGACTGATGGTGTGGGAAAAACAACACTAGTGAAAGAGCTAGCCCGAGAAGTAGTGGAAGATGGGTCATTTGATGTTGTAGTTATGGCTGAGGTAACCGATTCTCCAGATGTGGAAAACATTCAAGGCCAAATTACTACTTCGTTGGGTCTGATCAATTTTGATGGAGAGATAAAAAAAGGGAGAGTGAAAATATTGCTTGAAAGTATACCAAAAGTCAAGGTTCTTGATTTACATGGAATGAGGCTTGCACCTTCCCCACCACCTTCACTTCGTCTCTTGACAAAACTTATATCATTGAATTTGTATGGATGTGTATTGAAAGACATAGCAATGGTTGCAGAACTCACAAGGTTAGAAATTCTC…	MDPNIFKIGLYGTDGVGKTTLVKELAREVVEDGSFDVVVMAEVTDSPDVENIQGQITTSLGLINFDGEIKKGRVKILLESIPKVKVLDLHGMRLAPSPPPSLRLLTKLISLNLYGCVLKDIAMVAELTRLEILNLEGSEIQELPKEIGQLVYLRLLNLTNCLQLEIIPANVLSSLTNLEELYIGNCNIQWEVGGGKDRASLGELNHLNQLTTLDISIQHASVLPVDMNVFANLQRYNIFIGQMWNGDARETSRTLKLIDSYTNIWSNRGLQLLFPTLEYLSLHHLNFDKGEFDHPHILSPVSNQKVAMPNLEILELSFFIESLDKHPIHFYWQNLRILKVKYSHYSASLFSFSAARSLVKLQYLDIISCFKLREIFAQQEEVAFPNLETLLIKEMNSLR…
HK_NBARC_NBARC.Chr15.32	Chr15	TGFam.ISGAP	41286620	41292644	ATGGATGCGATAGCTCATGTCCCAGATGTTTCTGAAATAGCTCATTTGCCGGGTGTTTCTCAAATTGCTACTGTGATTACATTTATTAAGGATCAAATTGGGTACATATCCTCCTACGAGGAAAACCTTGAAAAGCTTATGACCGAGGTTCAACGTCTGAAGGATACTCAAGACGGTGTGCAACACCGGGTTGTTGAGGCTGAAAGGAATGGAGAGAAGATTGAAAATATTGTACAGAACTGGCTCAAGAAAGCAAATGAAATTGTTGCTGCAGCAAATAAAGTTATTGATGTTGAAGGAACTAGATGGTGTCTGGGACAATATTGTCCCTATCTGTGGACAAGATGTCAGCTGAGCAAGAGTTTTGAAAAAATGACAAAAGAGATTTCAGATGTCATA…	MDAIAHVPDVSEIAHLPGVSQIATVITFIKDQIGYISSYEENLEKLMTEVQRLKDTQDGVQHRVVEAERNGEKIENIVQNWLKKANEIVAAANKVIDVEGTRWCLGQYCPYLWTRCQLSKSFEKMTKEISDVIKKAKFETISYRDTPDVTITPSSRGYVALESRTSMLNEIKEILKDPKMYMIGVHGMGGVGKTTLVNELAWQVKKDGLFGAVAIAAITNSPDVKKIQGQIADALDLKLEKESERGRAINLRQRIKKQEKVLIILDDIWSELNLPEVGIPFGDEHNGCKLVITSREREVLTYMETQKDFNLTALLEEDSWNLFQKIAGNVVNEVSIKPIAEEVAKCCAGLPLLITPVAKGLKKKKVHAWRVALTQLKEFKHRELENNVYPALKLSYDFL…
HK_NBARC_NBARC.Chr15.33	Chr15	TGFam.ISGAP	41400524	41402043	ATGACAAAAGAGATTTCAGATGTCATAGAGAAAGGAAAATTTGATACAATTTCTTACCGTGATGCCCCTGATGTCACAATTACACCATTTTCTAGAGGTTATGAAGCACTGGAGTCCAGAACATCAATGCTGAATGAGATTAAGGAAATTCTTAAGGATCCTAAAATGTACATGATTGGGGTGCATGGGATGGGTGGCGTGGGTAAAACCACTCTTGTGAATGAGTTAGCTTGGCAAGTAAAGAAAGATGGATTATTTGTTGCTGTAGCCATAGCCAATATAACCAATTCTCCAAATGTGAAAAGAATTCAAGGCCAAATTGCTGATGCTTTGTTGGATCGGAAACTTGAAAAAGAGACAGAAGCAAGAGAAGTTCTTATTATTCTAGACGACATTTGG…	MTKEISDVIEKGKFDTISYRDAPDVTITPFSRGYEALESRTSMLNEIKEILKDPKMYMIGVHGMGGVGKTTLVNELAWQVKKDGLFVAVAIANITNSPNVKRIQGQIADALLDRKLEKETEAREVLIILDDIWSELDLTEVGIPFGDEHNGCKLVITSREREVLIKMDTQKDFNLTALLEEESWKLFQKIAGNVVNEVGIKPIAEEVAKCCAGLPLLITALGKGLRKKEVHAWRVALKQLKEFKHKEFENNVYPALKLSYDFLDTEELKLLFLFIGSFGLNEIHTEDLLICCWGLGFYGGVHTLMEARDTHYTFINELRASSLLLEGKPEWVGMHDVVRDVAKSIASKSLPTDPTYPTYADQFRKCHYIRFQSSLTQVQADNFFSGMMKEVMTLILYEM…
HK_NBARC_NBARC.Chr15.34	Chr15	TGFam.ISGAP	41482383	41494770	ATGGATGCGATAGCTCATGTCCCAGGTGTTTCTCAAATTGCTAATTATGTGATTACATTTATTAAGGATCAAATTGGGTACATATCCTCCTACGAGGAAAACCTTGAAAAGCTTATGACCCAGGTTCAAACTCTGGAGGATACTCAAGTTCTTGTGAAGAACCGGGTTGCTGAGGCTGAAAGGAACGGATACAAGATTGAAAATATTGTACAGAATTGGCTCAAGAATGCAAATGAGATTGTTGCTGAGGCAAAGAAAGTCATTGATGTTGAAGGAGCTACATGGTGTCTGGGACGATATTGTCCCTCTCGGTGGATAAGATGTCAGCTGAGCAAGCGTCTTGAAGAAACGACAAAAAAGATTACAGATCACATAGAGAAAGGAAAAATTGATACAATT…	MDAIAHVPGVSQIANYVITFIKDQIGYISSYEENLEKLMTQVQTLEDTQVLVKNRVAEAERNGYKIENIVQNWLKNANEIVAEAKKVIDVEGATWCLGRYCPSRWIRCQLSKRLEETTKKITDHIEKGKIDTISYRDAPDVTTTPFSRGYEALESRTSMLNEIKEILKDPKMYMIGVHGMGGVGKTTLVNELAWQVKKDGLFVAVAIANITNSPNVKKIQGQIADALWDRKLKKETESGRAIELRERIKKQEKVLIILDDIWSELDLTEVGIPFGDEHNGCKLVITSREREVLIKMDTQKDFNLTALLEEDSWNLFQKIAGNVNEVSIKPIAEEVAKCCAGLPLLITALGKGLRKKEVHAWRVALKQLKEFKHKELENNVYPALKLSYDFLDTEELKSL…
HK_NBARC_NBARC.Chr15.35	Chr15	TGFam.ISGAP	41563719	41573674	ATGGATGCGATAGCTAATGTACCGGGTGTTTCTGAAATTGCTAATTATGTGATTACATTTATTAAGGGTCAAATTGGGTACATATCCTCCTACGATGAAAACCTTGAAAAGCTTATAACCGAGGCTCAAACTCTGAAGGATACTCAAGACGGTGTGCAACACCGGGTTGTTGAGGCTGAAAGGAATGGAGACAAGATTGAAAATATTGTACAGAACTGGCTGAAGAAAGCAAATGAAATGGTTGCTGCGGCAAATAAAGTTATTGATGTTGAAGGAACTAGATGGTGTCTGGGACATTATTGTCCCTATCTGTGGACAAGATGTCAGCTGAGCAAGAGTTTTGAAAAAATTACAAAAGAGATTTCAGATGTCATAGAGAAAGGAAAATTTGATACAATT…	MDAIANVPGVSEIANYVITFIKGQIGYISSYDENLEKLITEAQTLKDTQDGVQHRVVEAERNGDKIENIVQNWLKKANEMVAAANKVIDVEGTRWCLGHYCPYLWTRCQLSKSFEKITKEISDVIEKGKFDTISYRDAPDLTITPFSRGYEALESRTSMLSEIKEILKDPKMYMIGVHGMGGVGKTTLVNELAWQVKNDGSFGAVAIATITSSPNVENVQDQIVVAICGKNLEHTTKVGRMGELRRRIKAQNNVLIILDDIWSELDLTEVGIPFGDEHNGCKLVITSREREVLIKMDTQKDFNLTALLEEDSWNLFQKIAGNVVNEVSIKPIAEEVAKCCAGLPLLITAVAKGLRKKEVHAWRVALKQLKEFKHKELENNVYPALKLSYDFLDTEELKS…
HK_NBARC_NBARC.Chr16.1	Chr16	TGFam.ISGAP	511814	515747	ATGGCTTTCCAAGTTTCTCATAAAATCAAATATGTTGCATTTCTTTGTCTCTTGCTTGCAAGGATAGACAATAATTCATCGTATCTAGTGACATCTTTTACTTTTCTCAACGACACTCCTCAAATAAAGTACGATGTCTTTGTTAGCTTTAGAGGAGCAGACATTCGCCAAGGTTTCCTTAGCCATTTGATTGAGGCATTTTCTCGAAAGCATATTGCTGCCTTTGTAGATCACAACATTCTCAAAGGAGATGAACTGTCTGAAACACTTCTTGGAGCCATTAATGGATCATTGATTTCATTGATTATATTTTCACAAAATTATGCTTCTTCACGTTGGTGTCTGTTAGAACTTGTGAAAATTGTTGAGTGCAGAAAAAGGGATGGACAAATTGTAGTG…	MAFQVSHKIKYVAFLCLLLARIDNNSSYLVTSFTFLNDTPQIKYDVFVSFRGADIRQGFLSHLIEAFSRKHIAAFVDHNILKGDELSETLLGAINGSLISLIIFSQNYASSRWCLLELVKIVECRKRDGQIVVPVFYKVDPSDVRHQKGTYGDAFAKHEGKFSLTTIQTWRSALNESANLSGFHSSTFGDEAELVKEIVKCVWMRLNHAHQVNSKGLVGVGKRIVHVESLLQLEAADVRIIGIWGIGGIGKTTIAQEVYNKLCFEYEGCCFLANIREESGRHGIISLKKNLFSTLLGEEYLKIDTPNGLPQYVERRLHRMKVLIILDDVNDSEQLETLARTDWFGPGSRIIVTTRDRQVLANEFANIYEVEPLNFDESLWLFNLNVFKQKHPEIEYYEL…
HK_NBARC_NBARC.Chr16.2	Chr16	TGFam.ISGAP	2919624	2934954	ATGGATGCTGTGTCGTCCGCACTAATAGAGCCGGTAACTAATTCTGTGTTGGATCTGGTTAAAAAGCATGTGGATTACATCCGTTACAGGCAAAACGTTGGTGAACTATACGAGTGTGTTGAACAGCTTGAACTTGATAAAGAAAGGGTAGATCATCAATGTAATAGAGCTGTCAAAAATGGACACAAGATTGAAGTTAAGGCTAGAGAATGGTCACGGAAAGTGGGTGAATTTAAGACAGAAGTGGAGAACTATAAGAATGATGAAGGCCACAGAAAGGCAGGGTTAACCAATTGTTTATTTCCTTACTTTAGGTATAGACTAGGCAGACTAGCAAAGAAGAAGGCAGTGGAGGGTAAAAAGCTAATCGATGGTTGCCCCAAGCCTGATGAAATTGCT…	MDAVSSALIEPVTNSVLDLVKKHVDYIRYRQNVGELYECVEQLELDKERVDHQCNRAVKNGHKIEVKAREWSRKVGEFKTEVENYKNDEGHRKAGLTNCLFPYFRYRLGRLAKKKAVEGKKLIDGCPKPDEIAFRGNVTFNDAILSNTDLMEFDSRKSIMEDIMEKLEDPTVKMIGVHGPGGVGKSTLIKAIAGSAQVKKLFNVVAFSEITANPNVKKIQEDIAYVLGLTLEGEGENVRADSLRRRLKQEKENTLIILDDLWDRLDLNKLGIPLDDDMNGLKMKGARKPDEMSGTNKEKSHDDYKGCKILLTSRDTTVLSEKMAVKSIFGVKELEEAEAMRLLKKVTGIPDQMSHSKQEIVRKYCAGIPMAIVTVGRALRNKSESVWEATLDKLKRQEL…
HK_NBARC_NBARC.Chr16.3	Chr16	TGFam.ISGAP	2944271	2952613	ATGGATGCTGTGTCGTCCGCACTAATAGAGCCGGTAACTAATTCTGTGTTGGATCTGGTTAAAAAGCATGTGGATTACATCCGTTACAGGCAAAACGTTGGTGAACTATACGAGTGTGTTGAACAGCTTGAACTTGATAAAGAAAGGGTAGATCATCAATGTAATAGAGCTGTCAAAAATGGACACAAGATTGAAGTTAAGGCTAGAGAATGGTCACGGAAAGTGGGTGAATTTAAGACAGAAGTGGAGAACTATAAGAATGATGAAGGCCACAGAAAGGCAGGGTTAACCAATTGTTTATTTCCTTACTTTAGGTATAGACTAGGCAGACTAGCAAAGAAGAAGGCAGTGGAGGGTAAAAAGCTAATCGATGGTTGCCCCAAGCCTGATGAAATTGCT…	MDAVSSALIEPVTNSVLDLVKKHVDYIRYRQNVGELYECVEQLELDKERVDHQCNRAVKNGHKIEVKAREWSRKVGEFKTEVENYKNDEGHRKAGLTNCLFPYFRYRLGRLAKKKAVEGKKLIDGCPKPDEIAFRGNVTFNDAILSNTDLMEFDSRKSIMEDIMEKLEDPTVKMIGVHGPGGVGKSTLIKAIAGSAQVKKLFNVVAFSEITANPNVKKIQEDIAYVLGLTLEGEGENVRADSLRRRLKQEKENTLIILDDLWDRLDLNKLGIPLDDDMNGLKMKGARKPDEMSGTNKEKSLDDYKGCKILLTSRDTTVLSEKMAVKSIFGVKELEEAEAMRLLKKVTGIPDQMSHSKQEIVMKYCAGIPMAILTVGRALRNKSESVWEATLDKLKRQEL…
HK_NBARC_NBARC.Chr16.4	Chr16	TGFam.PM	3121691	3128013	ATGCAAATCACTCTGAAGCAACTAGTGCTCACAAGGAATTGGGATAATTCAATGGGATCTTCCAATGAAGGATCTTCTTCTTCCACCCTAACCTCCGGAAGGTCATGGTCCAACCATGTTTTCTTGAGTTTTCGGGGTGATGACACACGCAAAGGTTTCACTGGCCATCTTTTTGCTTCCCTAGAGAGAAGGGGGATCAAAACATTCAAGGATGATCATGATCTTCAGAGGGGGAAATTGATATCAGTGGAACTCATGAAAGCCATTGAAGGGTCCATGCTTGCTCTTATCATTCTCTCACCAAACTATGCCTCCTCAACATGGTGTTTGGATGAGCTCAAAAAGATTCTAGAGTGCAAGAAAGAAGTTTTTCCAATCTTCCATGGTGTAGACCCCTCT…	MQITLKQLVLTRNWDNSMGSSNEGSSSSTLTSGRSWSNHVFLSFRGDDTRKGFTGHLFASLERRGIKTFKDDHDLQRGKLISVELMKAIEGSMLALIILSPNYASSTWCLDELKKILECKKEVFPIFHGVDPSDVRHQRGSFAKAFSEHEEKFREDKKKLERWRHALREVASYSGWDSKEQHEATLIETIVGHIQKKIIPRLPCCTDNLVGIDSRMKEVYSLMGISLNDVRFIGLWGMGGIGKTTIARFVYEAIKGDFNVSCFLENIREVSKTNGLVHIQKELLFHLNVRSSDFYNLHDGKNIIANSLSNKKILLVLDDVSELSQLENLAGKQEWFGSGSRVIITTRDKHLLKTHGVHLTCKAKGLAQNEALKLFCLKAFKQDQPKEEYLNLCKEVVEY…
HK_NBARC_NBARC.Chr16.5	Chr16	TGFam.ISGAP	7967972	7971472	ATGGCAGAAGCGATGGTTGCTGGGGCATTTCTCTCAGCCTCCCTTCAAGTGACTTTTGACAGGCTGGCTTCAAGTGACATCAAAGATTACTTCCATGGAAGGAAACTCAAGGATGAGATGCTCAAAAAGCTAGATATTGTGCTGAATTCTATCAACCAAGTGTTGGAGGATGCAGAGGAAAGGCAGTACAGAAGCCCTAATGTGATGAAGTGGCTTGATGAGCTTAAAGAGGCTATATATGAAGCAGAGTTGCTGTTAGACGAGGTTGCTACGGAGGCGTCACGACAGAAGCTGGAAGCTGAATTTCAGCCTGCTACTAGCAAGGTGCGAGGCTTCTTCATGGCTTTTATTAATCCCTTTGACAAACAAATTGAATCTAGGGTCAAAGAATTACTAGAG…	MAEAMVAGAFLSASLQVTFDRLASSDIKDYFHGRKLKDEMLKKLDIVLNSINQVLEDAEERQYRSPNVMKWLDELKEAIYEAELLLDEVATEASRQKLEAEFQPATSKVRGFFMAFINPFDKQIESRVKELLENIEFLAKQMDFLGLRKGICAGNEVGISWKLPNRLPTTSLVDESSICGREGDKEEIMKILLSDSVTCNQVPVVSIVGMGGMGKTTLSQLVYNDPRVLDQFDLKAWVYVSQDFDVVALTKAILKALRSLAAEEKDLNLLQLELKQRLMGKKFLLVLDDVWNENYWSWEALQIPFIYGSSGSRILITTRSEKVASVMNSSQILHLKPLEKEDCWKLFVNLAFHDKDASKYPNLVSVGSKIVNKCGGLPLAIRTVGNILRAKFSQHEWVK…
HK_NBARC_NBARC.Chr16.6	Chr16	TGFam.ISGAP	9823508	9826758	ATGGGTGGATTGGGTAAAACAACCATTGCCAAATCCATCTACAATGAATTTCGTCGTCAGAGATTCAGGCGAAGTTTCATTGAAACAAATAATAAAGGGCATACTGATTTGCAAGAAAAACTTCTTTCAGATGTCCTAAAAACAAAGGTTAAGATACATAGCGTTGCCATGGGGATATCTATGATTGAGAAAAAACTTTTTGCAGAAAGAGCTCTCATTATACTTGATGATGTGACTGAGTTTGAACAATTGAAAGCCCTATGTGGAAATTGTAAATGGATTGATCGTGGAAGTGTACTCATCATCACAACCAGAGATTTGCGCCTGCTTGAAGAACTTAAAGATCACCATGCAGTCCATATATGGAAAATAATGGAAATGGACGAGAATGAGTCCCTT…	MGGLGKTTIAKSIYNEFRRQRFRRSFIETNNKGHTDLQEKLLSDVLKTKVKIHSVAMGISMIEKKLFAERALIILDDVTEFEQLKALCGNCKWIDRGSVLIITTRDLRLLEELKDHHAVHIWKIMEMDENESLELFSKHAFREASPTENWNKLSIDVVAYCAGLPLALEILGSYLRWRTKEEWESVLSKLKKIPNYKVQEKLRISFDGLRDPMEKDIFLDVCCFFIGKDRTYVTEILDGCGLHASIGIKVLIEHSLIKVEKNKLGMHPLLRDMGREIVCESSKNEPGKRNRLWFQKDVLDVLTNNTGTETIQGLAVKLHFTSRDCFEAYSFEKMKGLRLLQLDHVQLSGNYGYLSKQLKWICWRGFPLKYIPNNFHLEGVIAIDFKYSKLRLLWKTPQV…
HK_NBARC_NBARC.Chr16.7	Chr16	TGFam.PM	9842066	9845431	ATGCACTTATTGTCAATTACCGATTTTCCAGTTGCATTAGAATCCCGTGTGCAAAAACTGATTAAGTTTGTTGATGATCAATCAGGCAGAGGTTGTGTTATAGGGATCTGGGGAATGGGAGGATTGGGTAAAACAACCATGGCCAAATCCATCTACAATAAATTTCGTCGTCAGAAATTCAGGCGAAGTTTCATTGAAACAAATAATAAAGGGCATACTGATTTGCAAGAAAAACTTCTTTCAGATGTCCTACAAACAAAGGTTAAGATACATAGCGTTGCCATGGGGATATCTATGATCGAGAGAAAACTTTTTGGAGAAAGGGCTCTCATTATACTTGATGATGTGACTGAGCCTGAACAATTGAAAGCCCTATGTGGAAATTGTAAATGGATTGAT…	MHLLSITDFPVALESRVQKLIKFVDDQSGRGCVIGIWGMGGLGKTTMAKSIYNKFRRQKFRRSFIETNNKGHTDLQEKLLSDVLQTKVKIHSVAMGISMIERKLFGERALIILDDVTEPEQLKALCGNCKWIDHGSVLIITTRDLRLLEELKDHHAVYIWKIMEMDENESLELFSKHAFREASPTENWKKLSIDVVSYCAGLPLALEVLGSFLRWRSKEEWEDVLSTLKKIPNYKVQEKLRISFDGLRDHMEKDIFLDVCCFFIGKDRAYVTEILKGCGLCASIGITVLIERSLIKVEKNNKLGMHPLLRDMGRDIVSERSTIEPGKRHRLWFQKDVLDVLTNNTGTETIQGLAMKLHFTSRDCFEAYSFEKMKELRLLQLDHVQLSGNYGYLSKQLKW…
HK_NBARC_NBARC.Chr16.8	Chr16	TGFam.PM	9853639	9857723	ATGGAGGGAGAGGGAGAGAAGGAGCATGAAATTTGGTGCCTCAAAAAAGGTTTGAACCAAGATGAAAAGCTTGAAAGGGGAGAAAGCATAATGCCCTCACTATTGCGAGCCATAGAAGGGTCTAAGATACACATCATCCTTTTTTCCAATAACTATGCTTCATCTAAATGGTGTCTTGATGAGCTGGTCAAAATCATGGAATGCCATAGAACTTACGGCAAAGAGGTTTTACCCGTATTTTACAATGTTGATCCATCGGATGTACGTAATCAAAGGGGTGATTTTGGACAAGGCTTGGAAGCACTTGCACAAAGATATATATTGCAAAGGGAGAACGATGTGTTGAAGAGTTGGAAGAGTGCACTCAATGAGGCAGCAAATTTGGCTGGTTGGGTTTCA…	MEGEGEKEHEIWCLKKGLNQDEKLERGESIMPSLLRAIEGSKIHIILFSNNYASSKWCLDELVKIMECHRTYGKEVLPVFYNVDPSDVRNQRGDFGQGLEALAQRYILQRENDVLKSWKSALNEAANLAGWVSRNYRTDADLVKDIVEDIIVKLDMHLLSITDFPVGLESRVQKLIKFLDDQSGRGCVIGIWGMGGLGKTTMAKSIYNKFRRQKFRRSFIETNNKGHTDLQVKLLSDVLQTKVKIHSVAMGISMIERKLFGERALIILDDVTEFEQLKTLCGNCKWIDHGSVLIITTRDLRLLEELKDHHAVYIWKIMEMDENESLELFSKHAFREASPTENWKKLSIDVVSYCAGLPLALEVLGSFLRWRSKEEWEDVLSTLKKIPDHLVQKKLRISF…
HK_NBARC_NBARC.Chr16.9	Chr16	TGFam.ISGAP	10022946	10027028	ATGGAATTCGTGGCTTCTTCTTCTTCCTTCTCACAGTCGAAACCTTCATCATCCTTCTCAAAATCGAAACCCAAACGGCTGTACGATGTGTTCATAAATTTTAGGGGAGAAGACACTCGAGGGAAGTTCGTTTCTCATCTTCATTATGCCCTCTCAAAAGCTGGAGTCAACACTTTCATTGACGACGAGAACCTACTTAAGGGAATGACACTGAAAGATGAACTGATGCGAGCAATAGAAGGGTCTCAGATATCTTTGGTTGTTTTCTCCAAAAGCTATACTGAATCTACTTGGTGTCTTGATGAGCTTGAAAAAATTCTTGAATGCCGCAAACTTCATGACCAAATAGTTATGCCCATATTTTACGATATTGAACCATCCGTTGTTCGACATCAGAAG…	MEFVASSSSFSQSKPSSSFSKSKPKRLYDVFINFRGEDTRGKFVSHLHYALSKAGVNTFIDDENLLKGMTLKDELMRAIEGSQISLVVFSKSYTESTWCLDELEKILECRKLHDQIVMPIFYDIEPSVVRHQKGAFGKALKSAVEKTYSGEHAEQVLWRWSSALNRAADLSGFHVVDRRNEAILVKEIVEDVLRKLVYEDLYVTEFPVGLESRVQKVIGLINNQFTKVCMIGIWGMGGLGKTSTAKGIYNQIHRKFIDKSFIEDIREICQTEGRGHILLQKKLLSDVLKTEVDILSVGMGKTTIKERLSGKRMLVVLDDVNELGQVEHLCGNREWFGQGTVIIITTRDVRLLKQLKVDSIYKLEEMDKNESLELFSWHAFGNAEPREDFKELARSVVAY…
HK_NBARC_NBARC.Chr16.10	Chr16	TGFam.ISGAP	10179068	10183590	ATGATAGTAGAGGGTGTTTTTTTTTTGCAACAACAACTTGTTTCTGATATCCTAAATATTAGAGTCGGGATGGGGATAATTGGGATCGAGAAAAAACTTTTTGGAAGAAGGCCCCTTATTGTACTTGATGATGTGACTGATGTTAAGCAATTGAAAGCCCTATCTTTAAATCGTGAATGGACTGGTACAGGATGTGTGTTCATCATTACAACCAGAGATGTACGCCTACTTAATGTACTTAAACCTTATCACAGAGTCCATGTTTGTAGAATAAAGGAAATGGACGAAAATGAGTCCCTTGAGCTTTTCAGTTGGCATGCTTTTAGACAAGCACATCCAAGAGAAGACTTGATTAAACTCTCAATGGACATAGTTGCTTACTGTGGAGGACTACCACTA…	MIVEGVFFLQQQLVSDILNIRVGMGIIGIEKKLFGRRPLIVLDDVTDVKQLKALSLNREWTGTGCVFIITTRDVRLLNVLKPYHRVHVCRIKEMDENESLELFSWHAFRQAHPREDLIKLSMDIVAYCGGLPLALEVLGSYLCERTKEEWESVLAKLRKIPNDQVQEKLRISYDDLDCEEKNIFLDICFFFIGKDRVNVTEILKGCDLHAEIGITILVERSLIKLEKNNKIKMHNLLRDMGREIVRQSSLEEPEKRSRLWVHQEVLDLLLEHTGTKAIEGLALKLQRTSGLHFNTKAFEKMKKLRLLQLDHVQLVGDYEYLNKNLRWLCLQGFPLQHIPENLYQENLISIELKYSNIRLVWKEPQLLQRLKILNLSHSRNLMHTPDFSKLPNLAKLNLK…
HK_NBARC_NBARC.Chr16.11	Chr16	TGFam.PM	10329633	10334160	ATGAATTATCCAAAGGGAGAGGAACTAAACGAAGGATTATTACGAACCATAGAAGGATGTCGGATATGTGTAGTTGTTTTCTCCACAAACTACCCTGCGTCTTCTTGGTGTCTTAAAGAGTTGGAAAAAATCATTGAATGCCACAAAACTTATGGCCACATAGTTTTGCCCATATTTTACGATGTTGATCCCTCCCATATACGTCATCAGCGGGGTGCTTTTGGGAAAAATTTGAAAGCATTTCAAGGATTGTGGGGAAAATCTGTGTTGTCGAGGTGGCGCACGGTACTCACCGAAGCTGCAAACTTCTCGGGTTGGGATGTGAGCAATAACAGGAACGAGGCTCAATTAGTGAAGGAAATTGCTGAAGATGTTCTCACAAAACTAGACAACACATTC…	MNYPKGEELNEGLLRTIEGCRICVVVFSTNYPASSWCLKELEKIIECHKTYGHIVLPIFYDVDPSHIRHQRGAFGKNLKAFQGLWGKSVLSRWRTVLTEAANFSGWDVSNNRNEAQLVKEIAEDVLTKLDNTFMHMTEFPVGLESHVQEVIGYIENQSTKVCIVGIWGMGGLGKTTTAKAIYNRIHRRFMGRCFIEDIREVCETDRRGHLHLQEQLLSNVLKTKVNIQSVGIGRAMIESKLSRRKALIVLDDVIEFGQLKVLCGNRKWFGQGSIVIITTRDVRLLHKLKVDFVYKMEEMDENKSLELFSWHAFGEAKPTEEFDELARNVVAYCGGLPLALEVIGSYLSERRKKEWESVLSKLKIIPNDQVQEKLRISYNGLGDHMEKDIFLDICCFFIG…
HK_NBARC_NBARC.Chr16.12	Chr16	TGFam.ISGAP	10363534	10368036	ATGTCTTCTTCATCATACTTCTCAGATTCCAATCCCCAATGGATATATGACGTGTTCATCAATTTTAGGGGAGAAGACACTCGTAGGAATTTCGTTTCTCATCTCTATTCTGCCCTCTCAAATGCTGGAGTCAATACTTTCCTTGACGAAATGAATTATCCAAAGGGAGAGGAACTAAACGAAGGATTATTACGAACGATAGAAGGATGTCGGATATGTGTAGTTGTTTTCTCCACAAACTACCCTGCGTCTTCTTGGTGTCTTAAAGAGTTGGAAAAAATCATTGAATGCCACAAAACTTATGGCCACATAGTTTTGCCCATATTTTACGATGTTGATCCCTCCGATATACGTCATCAGCAGGGTGCTTTTGGGAAAAATTTGAAAGCATTTCAAGGA…	MSSSSYFSDSNPQWIYDVFINFRGEDTRRNFVSHLYSALSNAGVNTFLDEMNYPKGEELNEGLLRTIEGCRICVVVFSTNYPASSWCLKELEKIIECHKTYGHIVLPIFYDVDPSDIRHQQGAFGKNLKAFQGLWGESVLSRWSTVLTQAANFSGWDVSNNRNEAQFVKEIVEDVLTKLDNTFMPITEFPVGLESHVQEVIGYIENQSTKVCIVGIWGMGGLGKTTTAKAIYNRIHRRFTGRCFIEDIREVCETDRRGHVHLQEQLLSDVLKTKVNIKSVGIGRAMMESKLSGTKALIVLDDVNEFGQLKVLCGNRKWFGQGSIVIITTRDVRLLHKLKVDFVYKMEEMDENKSLELFSWHAFGEAKPIEEFDELARNVVAYCGGLPLALEVIGSYLSE…
HK_NBARC_NBARC.Chr16.13	Chr16	TGFam.ISGAP	10470129	10473525	ATGCTACTAACTAAGAAAATTGTTGAAGACATTCTCACAAAGCTAGACTATGCACTCTTGTCTATTACCGAATTTCCTATTGGATTGGAACCCCGCGTGCAAGAAGTGATTGGAGTTATAGAAAATCAATCCACCAAGGTCTGTATCATAGGGATATGGGGAATGGGTGGATCGGGTAAAACTACCATTGCCAAAGCCATCTACAATCAAATTCATCGTAGATTCATGGACAAGAGTTTCATTGAAAATATTAGAGAAGTTTGTGAGACAGATGGTAGAGGACATGTTCATTTACAAGAACAACTTCTTTCAGATGTTCTAAAAACAAAGGAGAAGGTACGTAGCATTGGGATGGGAACAACTATGATTGACAAAAGACTTTCTGGAAAAAGGACGTTC…	MLLTKKIVEDILTKLDYALLSITEFPIGLEPRVQEVIGVIENQSTKVCIIGIWGMGGSGKTTIAKAIYNQIHRRFMDKSFIENIREVCETDGRGHVHLQEQLLSDVLKTKEKVRSIGMGTTMIDKRLSGKRTFIVLDDVNEFGQLKNLCGNRKWFGQGSVIIITTRDRRLLDQLKVDYVYDVDKMDENESLELFSWHAFNEAKPKEDFNELARNVVAYCGGLPLALEVLGSYLNERRKKDWESVLSKLERIPNDQVQEKLRISFDGLSDHMEKDIFLDICCFFIGKDRAYITEILKGCGLHADIGITVLIDRSLLKVEKNNKLGMHQLLRDMGREIICESSRKEPGKRSRLWFHEDVLDVLTNNTGTVAIEGLALKLHFAGRDCFNAYAFEEMKRLRLL…
HK_NBARC_NBARC.Chr16.14	Chr16	TGFam.PM	23135563	23141342	ATGGATCGAAGTTGGATGCAAGCATCACACATCAGTGACGAGTATGAGAATGGAGTTGAACAATTCCTCCAATTTACTGAACTCAATCCACCATCTTTGTGGGGTAAATATTTTTGTCCATGTGTGAAATGTGCGAATTGGAGACACCAGATAATAACTGAGATAAGATCACATCTTATATGTCACGGGATCATTCCAAGTTACACAAAATGGATATGGCATGCGCAATTTCCAGACAACCCATCAGTCTCTCAGACTAAGTCAGTCGATGTAGACATGGGATACCATATAGAAGAGATGATTCACGATCTGGGGCAAGACGGATTTCAACAAGCACATGCCCCTTTCAATGACTTCCAAGATTATTTTGATGATGCCAAAGAATCAAGAGTTAAGCAA…	MDRSWMQASHISDEYENGVEQFLQFTELNPPSLWGKYFCPCVKCANWRHQIITEIRSHLICHGIIPSYTKWIWHAQFPDNPSVSQTKSVDVDMGYHIEEMIHDLGQDGFQQAHAPFNDFQDYFDDAKESRVKQVPKNQASRIKSQRIKIQEQLSFKIQDSRTIKIKIQEKFQRTNRLRILCPNTLEGTSFVVLVEGTSTWVVILRTREVTSLVDQFKWRVHPLGCSKRTREGTSLVDLWLIKDFTRLKEISRTVGCLETGCRHGLLPNNVSQLCDRGYKVSFDSEKCVIKHEHDKDIEHIGFRENNVYMIDLKQKSENDRCFLSKESDPWLWHKRIAHINMDHLNRLISKDLVVGLPKLKLEKDKLCDACQKGKETKVSFKSKNIVSTTQPLQLLHMDL…
HK_NBARC_NBARC.Chr16.15	Chr16	TGFam.AUG	25933587	25939203	ATGCTCCACGAGCTCAGACGGTATTTCTTGAAGAAGAGAATCATCAGCGTGAGGGAAGAGTCACGAGTTCGAGAATGGGATTTCAGAAACTTTTCGGGTGGAAGAGAGGATGAAGGTTATAAAGGAAATATGAGAATACAATCCCAATACAAGCCACACAAACAGTATGTTGGCATAAGGATAGGTGGGAAAAAAGTTTTGGTTGTTCTTGATGATGTGAATACTTCGGAACAATTAAAATCTCTGGTTGGAGAACCAATTTGGTTTGGTGCAGGGAGTAGAGTCATCATAACAAGTAGAGATAAGCATGTACTTACAAGCGGAGGAGTTCCTCAAACTCAAATCCATAAGGTCAAGGAAATGGACACTCAATATTCCCTCAAACTCTACTGCTTAAAC…	MLHELRRYFLKKRIISVREESRVREWDFRNFSGGREDEGYKGNMRIQSQYKPHKQYVGIRIGGKKVLVVLDDVNTSEQLKSLVGEPIWFGAGSRVIITSRDKHVLTSGGVPQTQIHKVKEMDTQYSLKLYCLNAYDGLDEVEEAAFLDASGFYGASGIHVLQQKALITISSDNIIQMHDLIREMGCKIVLKNLLNVQEDAGTDKVEAMQIDVSQITNLPLEVDTLKRMSPLPFLKFNLPTPAEAELSMSPNPAPFRSPENQDALLSSAGCKELMSIANEIHIKCHDYLLIEGCSDPSLPSSIEISRLQKITHPVMEIILNSPIGHLNDLKDLDYQQFN*
HK_NBARC_NBARC.Chr16.16	Chr16	TGFam.PM	25976600	25980911	ATGACATCCTCATCTACTAGTATAAAAAAAGATGTCTTCATCAGCTTTAGAGGCCCAGATGTTAGGAAAGGTCTACTTAGCCATTTGAAAAAAGAATTGTGTCGCAGGCAGATTGAAGCCTGTGTGGATGAGATACTTGACAGAGGAGATGAAATATCATCCTCACTTCTCAGGGCAATTGAAGAATCACAAATTTTATTGGTCATATTCTCAAAAGACTATGCTTCATCGCAGTGGTGCTTGGAGGAGCTTGCCAAAATGATTGAATGCTTGGAAAGAAACAAACAGATTCTTGTACCTGTTTTTTTTAACGTAGATCCATCAGATGTGCGGCAGCAACACGGAGAATATGGTGATGCTTTAGCTAAACATGAAGAAAAACTCAAGGAAAACATGTTC…	MTSSSTSIKKDVFISFRGPDVRKGLLSHLKKELCRRQIEACVDEILDRGDEISSSLLRAIEESQILLVIFSKDYASSQWCLEELAKMIECLERNKQILVPVFFNVDPSDVRQQHGEYGDALAKHEEKLKENMFKVQSWRSALKKAANLSGFHYPGNFDDESDLVDKIVEDISEKLSKSSPSESNGLVGNDQNIVQIQSLLLKESNEVIFVGIWGMGGIGKTTIAHAMYDKYSPQYEGCCFLNVREEVEQRGLSHLQEKLISELLEGEGLHTSGTSKARFFDSAGRKMGRKKVLVVLDDVNTSEQLKYLVGKPICFGPGSRVLITSRDKRVLTSGGVYQIHKVKEMDPRDSLKLFCLNAFNESHPKMGYEKLSEEVVKIAQGNPLALKVLGADFHSRSMD…
HK_NBARC_NBARC.Chr16.17	Chr16	TGFam.ISGAP	27378799	27383799	ATGGCTACGGGATCATGTTCCTCTTCCTCTTCCTCCAATTACGATGTGTTCCTCAGCTTCAGAGGGGAAGACACACGTCATGGTTTTACTGGCTATCTCTACAAAGCTCTTCATGACAAGGGAATCCGCACTTTCATTGATGAGGAGCTTCAAAGAGGGAAGGAAATAACACCAGAACTTATGAAGGCAATTGAAGATTCCAGAGTTGCCATCACTGTGCTCTCTGAAGACTATGCTTCTTCCTCGTTTTGCTTAGATGAACTTGCAACCATCTTTGACCAGAGGAAACGGTTGTTGGTTATACCGGTCTTTTATAAGGTGGATCCTTCTGATGTGAGAAACCAGAGAGGCAGTTATGGAGAAGCATTGAAAAAGCTTGAGGGAAAGTTCCAGCATGAC…	MATGSCSSSSSSNYDVFLSFRGEDTRHGFTGYLYKALHDKGIRTFIDEELQRGKEITPELMKAIEDSRVAITVLSEDYASSSFCLDELATIFDQRKRLLVIPVFYKVDPSDVRNQRGSYGEALKKLEGKFQHDPEKLQKWKMALKQVADLSGYHFKEGDGYEFKFIEKIVEQVSRVISLGLLHVADYPVGLESRVLHVRSLLDAGSDDGVHMIGIHGMGGIGKSTLARAVYNVLIIAEKFDGLCFLANVRENSNKHGLERLQEKLLLEILGEKNISLTSKEQGIPIMESRLTGKKILLILDDVDKREQLQAIAGRPGWFGPGSKIIITTRDKQLLTSHEVYITYEVKELDEKDALQLLKWEAFKKEKASPTYVEVEVLHRVVTYASGLPLALEVIGSHL…
HK_NBARC_NBARC.Chr16.18	Chr16	TGFam.ISGAP	27388262	27395318	ATGGCTTTGGGATCATGTTCCTCTTCCTTCAACTATGATGTTCTCCTCAGCTTCAGAGGTGCAGACACACGTCATGGTTTTACCGGAAATCTTTACAAAGCTCTTGATGACAGGGGAATCTACACTTTCATTGATGATGAGGAGCTTCAGAGTGGAGAGGAAATAACACCAGCACTTCTGAAGGAAATTCAAGATTCCAGGATTGCCATCACTACACCAGGAAGTAGTTATGGAGAAGCATTGGCTAAGCATGAGGAAAGGTTCAACCACAACATGGAGAAGTTGGAGTATTGGAAGAAGGCTCTGCATCAAGTAGCTAACTTGTCTGGCTTTCATTTCAAACACGGAGAAGGGTATGAATACGAGTTTATTGGGAGGATTGTTGAGTTGGTCTCCAGC…	MALGSCSSSFNYDVLLSFRGADTRHGFTGNLYKALDDRGIYTFIDDEELQSGEEITPALLKEIQDSRIAITTPGSSYGEALAKHEERFNHNMEKLEYWKKALHQVANLSGFHFKHGEGYEYEFIGRIVELVSSKINHAPLPVADYPVGLESRLLEVTKLLDVESDDGVYMIGIHGIGGIGKTTLAIAVYNLIACHFDGSCFLKDLREKSNKQELQYLQINLLWEILGEKEINLASVEQGASIIQHRLQRKKVLLILDDVDKHEQLQAIVGRPCWFGPGSRVIITTRDKQLLASHGVKRTYEVKLLNENNALQLLTWKSFKTEKVDPSYKEVLNDVVIYASGLPLALEVIGSNLIPSIQILEILKVSFDALEEEQKNVFLDIVCCFNRYALTEVIDILRA…
HK_NBARC_NBARC.Chr16.19	Chr16	TGFam.AUG	27620065	27620896	ATGTTGATATTAAGCATACAGGACTTAACATCTAATGATGCCTCTTTGTCTAATGCTGGCTATATGGAATTTGGTTCTAGAAAATCCACTATGAAAGACATAATGACAAAACTTGAAGATTCCACTGTGAGAATGATTGGACTGCATGGACCAGGTGGTGTGGATAAGAGCACTTTAATCAAAGTAATTGCTAAGAAAGCACGAGACAAGAAACTATGTAATGTGGTGGTTAAAGTAGAAATAACACCCAATTCCAACCAACAAAGAATTCAGGAAGAAATTGCTTAG	MLILSIQDLTSNDASLSNAGYMEFGSRKSTMKDIMTKLEDSTVRMIGLHGPGGVDKSTLIKVIAKKARDKKLCNVVVKVEITPNSNQQRIQEEIA*
HK_NBARC_NBARC.Chr16.20	Chr16	TGFam.ISGAP	28629786	28640325	ATGGCTCTGCGATCATTCTCCTACGATGTGTTCCTCAGCTTCCGAGGGGAAGATACTCGTTATGGTTTCACTGGCAATCTCTACAATGTCCTCCGGGAAAGGGGAATTCACACCTTCATTGATGACGAGGAGCTCCAGAAAGGGGATGAAATCACCACAGCACTTGAGGAGGCAATTGAGAAGTCCAAGATTTTCATCATCGTGCTCTCTGAAAACTACGCATATTCCTCCTTTTGCTTAAACGAACTCACTCACATCCTTAACTTTACTGAGGGGAAGAATGATCCGTTGGTTTTGCCAGTTTTTTATAAAGTGAATCCTTCATATGTCCGACACCACAGAGGTAGTTTTGGAGAAGCACTGGCTAATCATGAAAAGAAGTTGAACTCTAATAACATG…	MALRSFSYDVFLSFRGEDTRYGFTGNLYNVLRERGIHTFIDDEELQKGDEITTALEEAIEKSKIFIIVLSENYAYSSFCLNELTHILNFTEGKNDPLVLPVFYKVNPSYVRHHRGSFGEALANHEKKLNSNNMEKLETWKMALRQVSNISGHHLQHDGNKYEYKFIKEIVESVSSKFNRDHLDVPNVLVGLESPVRQVKSLLDVGRDDVVHMVGIHGLAGVGKTTLAVAVYNSIADHFEASCFLENVRETTNKKGLEDLQSAFLSKTAGEIKLTNWREGITIIKCKLKQKKVLLILDDVDEHKQLQAIIGSPDWFGRGSRVIITTRDEHLLALHNVKITYKVRELNEKHALQLLTHKAFELEKEVDPSYHDILNRAITYASGLPLALEVIGSNLLEKSI…
HK_NBARC_NBARC.Chr16.21	Chr16	TGFam.AUG	28657849	28662836	ATGGCTGTGCGATCATTCTCCTACGATGTGTTCCTTAGCTTCCGTGGGGAAGATACTCGTTATAGTTTCACTGGCAATCTCTACAATGTCCTTCGGGAAAGGGGAATTCACACCTTCATTGATGACGACGAGCTCCAGAAAGGGGACCAAATCACGTCAGCACTTGAGGAAGCAATTGAGAAGTCCAAGATTTTCATCATCGTGCTCTCTGAAAACTACGCATCTTCCTCCTTTTGCTTAAACGAACTCACTCACATCCTTAATAACTTTACTAAGGGGAAGAATGATCTGTTGGTTTTGCCAGTTTTTTATATAGTGGATCCTTCAGATGTCCGACACCACAGAGGTAGTTTTGGAGAAGCACTGGCAAATCATGAAAAGAAGTTGAACTCTGATAAC…	MAVRSFSYDVFLSFRGEDTRYSFTGNLYNVLRERGIHTFIDDDELQKGDQITSALEEAIEKSKIFIIVLSENYASSSFCLNELTHILNNFTKGKNDLLVLPVFYIVDPSDVRHHRGSFGEALANHEKKLNSDNMEKLETWKMALHQVSNISGHHFQHDGNKYEYKFIKEIVELVSSKFNHALLQVPDVLVGLESPVLEVKSLLDVGSDDVVHMVGIHGLGGVGKTTLAVAVYNSIAGHFEASCFLENVRETSNKKGLQHLQSILLSKTVGEKKIKLTNWREGIPIIKHKLKQKKFGCGSRVIITTRNEHLLALHNVKITYKVRELNEKHALQLLIQKAFELEKEVDSSYNDILNRAVIYASGLPLALEVIGSNLFEKSIKEWESALNGYERIPDKSIYM…
HK_NBARC_NBARC.Chr16.22	Chr16	TGFam.PM	28688949	28692013	ATGTGTTCCTTAGCTTCCGAGGGGAAGATACTCGTTATGGTTTCACTGGCAATCTCTACAATGTTCACCGGGAAAGGGGAGTTCACACCTTCATTGATGACGACGAGCTCCAGAAAGGGGACCAAATCGATCACCACAGCACTTGAGGAGGCAATTGAGAAGTCCAAGATTTTCATCATCGTGCTCTCTGAGAACTACGCATCTTCCTCCTTTTGCTTAAACGAACTCACTCACATCCTTAACTTTACTAAGGAGAAGAATGATGTGTTGGTTTTGCCAGTTTTTCATAAAGTGAACCCTTCAGATGTCCGACACCATAGAGGTAGTTTTGGAGAAGCACTAGCTAATCATGAAAAGAAGTTGAACTCTAATAACACGGAGAAGCTTCAGACCTGGAAG…	MCSLASEGKILVMVSLAISTMFTGKGEFTPSLMTTSSRKGTKSITTALEEAIEKSKIFIIVLSENYASSSFCLNELTHILNFTKEKNDVLVLPVFHKVNPSDVRHHRGSFGEALANHEKKLNSNNTEKLQTWKMALHQVSNISGYHFQDDGNKYEYKFIKEIVEWVSSKVNRDHLHVSDVLVRLESPMLEVKLLLDVGRDDVIHMVGIHGLDEVGKRSLAVAVYNSIGGHFEASFFLGNVRGTSNEINGLEDLQSIILSKTVGEIKLTNWREGIHIIKRKLKGKKVLLILDDVDEQTQLQAIIGSLDWFGSGTRVIITTRDEHLLALHNIKITYKVRELNEKHALQLLTRKAFELEKEVDPSYHVLMIWQVHQMSK*
HK_NBARC_NBARC.Chr16.23	Chr16	TGFam.PM	28694944	28700178	ATGGCTGTGCGATCATTCTCTTATGATGTGTTCCTCAGCTTCCGAGGGGAAGATACTCGTTATGGTTTCACGGGCAATCTCTACAATGTCCTTCGGGAAAGGGGAATTCACACCTTCATTGATGACGACGAGCTCCAAAAAGGGGACGAAATCACCACAGCACTTGAGGAGGCAATTGAGAAGTCCAAGATTTTCATCATCGTGCTCTCTGAAAACTACGCATCTTCCTCCTTTTGCTTAAACGAACTAACTCACATCCTTAACTTTACTGAGGGAAAGAATGATCGGTTGGTTTTGCCAGTTTTTTATAAAGTGAATCCTTCAATTGTCCGAAAACACAGAGGTAGTTATGGAGAAGCACTGGCTAATCATGAAAAGAAGTTGAACTCTAATAACATG…	MAVRSFSYDVFLSFRGEDTRYGFTGNLYNVLRERGIHTFIDDDELQKGDEITTALEEAIEKSKIFIIVLSENYASSSFCLNELTHILNFTEGKNDRLVLPVFYKVNPSIVRKHRGSYGEALANHEKKLNSNNMEKLETWKMALQQVSNISGHHFQHDGGKYEYKFIKEIVESVSSKFNRAFLHVPDVLVGLESPVLEVKSLLDIESDDVVHMVGIHGLAAVGKTTLAVAVYNSIADQFEASCFLANVRETSNKIGLEDLQSILLSKTVGEKKIKLTNWREGIPIIKHKLKQKKVLLILDDVDEHKQLQAIIGNPDWFGRGSRVIITTRDEHLLALHNVKITYKVKELNEKHALQLLTQKAFELEKEVDPSYHDILNRAVTYASGLPLALEVIGSNLFEK…
HK_NBARC_NBARC.Chr16.24	Chr16	TGFam.ISGAP	28705951	28709660	ATGGCTGTGCGATCATTCTCTTACGATGTGTTCCTCAGCTTCCGAGGGGAAGATACTCGTTATTGTTTCACTGGCAATCTCTACAATGTCCTTCGCGAAAGGGGAATTCACACCTTCATTGATGACGACGAGCTCCAGAAAGGGGACCAAATCACGTCAGCACTTCAGGAAGCAATTGAGAAGTCCAAGATTTTCATCATCGTGCTCTCTGAAAACTACGCATCTTCCTCCTTTTGCTTAAACGAACTCACTCACATCCTTAACTTTACTAAGGGGAAGAATGATCTGTTGGTTTTGCCAGTTTTTTATATAGTGGATCCTTCAGATGTCCGACACCACAGAGGTAGTTTTGGAGAAGCACTGGCTAATCATGAAAAGAAGTTGAATTCTACTAACATG…	MAVRSFSYDVFLSFRGEDTRYCFTGNLYNVLRERGIHTFIDDDELQKGDQITSALQEAIEKSKIFIIVLSENYASSSFCLNELTHILNFTKGKNDLLVLPVFYIVDPSDVRHHRGSFGEALANHEKKLNSTNMENLETWKIALHQVSNISGYHFQHDGDKYEYKFIKEIVELVSNKFNRDLLHVSDALVGLESPVLEVKSLMDVGSDDVVQMVGIHGLGGVGKTTLAVAVYNSIADHFEASCFLENVRETSNKKGLQHLQSILLSKTVGEKKIKLTNWREGIHIIKRKLKEKKVLLILDDVDEQKQLQAIIGSPDWFGGGSRVIITTRDEHLLALHNVKITYKVRELNEKHALQLLSQKAFELEKEVDPSYHDILNRAVAYASGLPLALEVIGSNLFEK…
HK_NBARC_NBARC.Chr16.25	Chr16	TGFam.ISGAP	28727735	28732125	AAATATGAATACGATTTTATTAAGGAGATAGTTGAATCGGTGCCTAGCAAGTTTAATCGTAATCTTTTATATGTTTCGGATGTCCTGGTTGGGCTAAAGTCACCGGTGCTAGCAGTAAAGTCGCTTCTGGATGTTGGAGCTGATGATGTTGTCCACATGGTGGGGATCCATGGACTTGGCGGAGTGGGTAAAACAACACTTGCTGTCGCAGTCTATAATTCCATTGCTTGCCATTTTGAAGCCTGTTGCTTTCTTGAAAATGTGAGAGAAACTTCCAACAAAAAGGGGTTAGAAAGTCTCCAAAACATCCTTCTTTCTAAAACAGTTGGAGATATGAAAATTGAAGTAACAAATTCGAGAGAAGGAACTGACATAATAAAGCGTAAGCTCAAGGAAAAG…	KYEYDFIKEIVESVPSKFNRNLLYVSDVLVGLKSPVLAVKSLLDVGADDVVHMVGIHGLGGVGKTTLAVAVYNSIACHFEACCFLENVRETSNKKGLESLQNILLSKTVGDMKIEVTNSREGTDIIKRKLKEKKVLLVLDDVNEHEQLQAIIDSPDWFGRGSRVIITTRDEQLLVLHNVKRTYKVRELNEKHALQLLTQKAFGLEKKVDPSYHDILNRAVTYASGLPLALKVIGSNLFGKSIEEWESVLDGYERSPDKSIYMTLKVSYDALNEDEKSIFLDIACCFKDYELAKVQDILYAHYGRSMKYDIGVLVEKSLINIHRSWYDKEVMRLHDLIEDVGKEIVRRESPKEPGKRSRLWSHEDIKEVLQEKKGTGKIEIICMNFSSFGKEVEWDGDAL…
HK_NBARC_NBARC.Chr16.26	Chr16	TGFam.AUG	28758369	28762274	ATGGCTCTGCGATCATTCTCCTACGATATGTTCCTCAGCTTCCGAGGGGAAGATACTCGTTATGGTTTCACTGGCAATCTCTACAAAGTCCTCCAGGAAAGGGGAATTCACACCTTCATTGATGACGAGGAGCTCCAGGAAGGGGACCAAATCACCACAGCACTTGAGGAGGCTATTGAGAAGTCCAAGATTTTCATCATCGTGCTCTCTGAAAACTACGCATCTTCCTCCTTTTGCTTAAACGAACTCACTCACATCCTTAACTTTACTAAGGAGAATAATGATGTGTTGGTTTTGCCAGTTTTTTATAAAGTGGATCCTTCAGATGTCCGACACCATAGAGGTAGTTTTGGAGAAGCACTGGCTAATCATGAAAAGAACTTGAACTCTAATAACATG…	MALRSFSYDMFLSFRGEDTRYGFTGNLYKVLQERGIHTFIDDEELQEGDQITTALEEAIEKSKIFIIVLSENYASSSFCLNELTHILNFTKENNDVLVLPVFYKVDPSDVRHHRGSFGEALANHEKNLNSNNMEKLQIWKKALHQVSNISGYHFQDDGNKYEYKFIKEIVESVSNKTSNTIDGLEKLQNNLLSKMVGEIKFTNWREGITIIKRKLKQKKILLILDDVDKHKQLQAITDSPDWFGRGSRVIITTRDENLLVLHNVKITYKVREFNKIHALLLLTHKAFELEKEVDPRYCYFLNRAVTYASDLPLALEIIGSNLFGKSIEESESALNGFERIPDNNIYEILKVSYDALNEDEKSIFLDIACCFKDYELA*
HK_NBARC_NBARC.Chr16.27	Chr16	TGFam.ISGAP	28786645	28789556	ATGGCTCTGCGATCATTCTCTTACGATGTGTTCCTCAGCTTCCGAGGGGAAGATACTCGTTATGGTTTCACTGGCTATCTCTACAATGTCCTTCGGGAAAGGGGAATTCACACCTTCATTGATGACGACGAGCCCCAGGAAGGGGACGAAATCACGACAGCACTTGAGGCGGCTATTGAGAAGTCCAAGATTTTCATCATCGTGCTCTCTGAAAACTACGCATCTTCCTCCTTTTGTTTAAACTCACTCACTCACATCCTTAACTTTACTAAGGAGAATAATGATGTGTTGGTTTTGCCCGTTTTTTATAGAGTGAATCCTTCAGATGTCCGACACCACAGAGGTAGTTTTGGAGAAGCACTGGCTAATCATGAAAAGAAGTCGAACTCTAATAACATG…	MALRSFSYDVFLSFRGEDTRYGFTGYLYNVLRERGIHTFIDDDEPQEGDEITTALEAAIEKSKIFIIVLSENYASSSFCLNSLTHILNFTKENNDVLVLPVFYRVNPSDVRHHRGSFGEALANHEKKSNSNNMEKLETWKMALHQVSNISGHHFQHDGNKYEYKFIKEIVESVSNKFNHDHLHVSDVLVGLESPVLEVKSLLDVGRDDVVHMVGIHGLAGVGKTTLAIAVYNSIAGHFEASCFLENVKRTSNTINGLEKLQSFLLSKTAGEIKLTNWREGIPIIKRKLKQKKVLLILDDVDEDKQLQALIGSPDWFGLGSRIIITTRDEHLLALHNVKITYKVRELNEKHALQLLTQKAFELEKGIDPSYHDILNRAVTYASGLPFVLEVIGSNLFGKS…
HK_NBARC_NBARC.Chr16.28	Chr16	TGFam.AUG	28797089	28801867	ATGGCTTGGCGATCATTCTCCTACGATGTGTTCCTCAGCTTCCGAAGGGAAGATACTCGTCATGGTTTCACTGGCAATCTCTACAATGTCCTTCGCGAAAGGGGAATTCACACCTTCATTGATGACGACGAGCCCCAGAAAGCGGACCAAATCACGTCTGCACTTGAGGAAGCAATTAAGAACTCCAAGATTTTCATCATCGTGCTCTCTGAAAACTACGCATCTTCTTTCTTTTGCTTAAACGAACTCACTCACATCCTTAACTTTACTAAGGGGTGGGATGATGTGTTGGTTTTGCCAGTTTTTTATAAAGTGGATCCTTCAGATGTCCGACACCATAGAGGTAGTTTTGGAGAAGCACTGGCTAATCATGAAAAGAACTTGAACTCTAATTACATG…	MAWRSFSYDVFLSFRREDTRHGFTGNLYNVLRERGIHTFIDDDEPQKADQITSALEEAIKNSKIFIIVLSENYASSFFCLNELTHILNFTKGWDDVLVLPVFYKVDPSDVRHHRGSFGEALANHEKNLNSNYMGKLKTWKMALRQVSNFSGHHFQPDGNKYEYKFIKEIVESVSNKLNGDHLYVSDVLVGLESPVLEVKELLDVGRDDVVHMVGIHGLPGVGKTTLAVAVYNSIVDHFEASCFLENVRETSNKNGLVHLQSVLLSKTDGEIKLANSREGSTIIQRKLKQKKVLLILDDVDEHKQLQAIIGNPDWFGRGSRVIITTRDEHLLALHKVKITYEVRELNKKHALQLLTQKAFELEKEVDPSYHDILNRAITYASGLPLALEVMGSNLFGKSI…
HK_NBARC_NBARC.Chr16.29	Chr16	TGFam.AUG	28809271	28819393	ATGAATAAGAGCATAGGACCAAAAGACAAGAGAAACAAATATGAATACAAGTTTCTTAAGGAGATAGTTGAATCAGTGTCTAGCAAGTTTAATCGGGATCATTTGCATGTTTCAGATGTCCTGGTTGAGCTAGAGTCACCAGTGCAACAAGTAAAGTTGCTTTTGGATGTTGGATGTGATGATGTCGTCCACATGGTGGGGATCCATGGACCTACCGAAGTAGGTAAAACAACACTTGCCATCGCAATCTATAATTCCATTGCTGACCATTTTGAAGCTTCTTGCTTTCTTGAAAATGTGAGAGAAACTTCTAACAAAGATGGGTTACAACGTGTCCAAAGCATCCTTCTTTCTAAAACAGTTGGAGAAATTAAGTTAACAAATTGGAGAAAAGGAATT…	MNKSIGPKDKRNKYEYKFLKEIVESVSSKFNRDHLHVSDVLVELESPVQQVKLLLDVGCDDVVHMVGIHGPTEVGKTTLAIAIYNSIADHFEASCFLENVRETSNKDGLQRVQSILLSKTVGEIKLTNWRKGIPMIKRKLKQKKVLLILDDVDEHKQLQAIIGSPDWFGRGSRVIITTHDEYLKRSMLWSHEDLNQVLKENKNGMEMPSSIQILCFKVPDELFSLFLSCFVNVVNLELIGSKFTVIPECIKECHFLCILTLEYCKHLQEIRGIPPNLKEFSALGCLALTSSIRVNGTVQRLYVKIRRIHVLKEQSSMEDIRFTDPFRKRKFCSSEVAVGKKQRLVGKIGKGVVENLKDNRGKGASEMSQGEAEHSGKVACTATNFNGDEHSFSCEQTCT…
HK_NBARC_NBARC.Chr16.30	Chr16	TGFam.PM	28829302	28833349	ATGGCTCTGCGATCATTCTCCTACGATGTGTTCCTCAGCTTCCGAGGAGAAGATACTCGTTATGGTTTCACTGGCAATCTCTACAATGTCCTCCGGGAAAGGGGAATTCACACCTTCATTGATGACCAGGAGCTCCAGAAAGGGGACCAAATCACAAAAGCACTTGAGGAGGCTATTGAGAAGTCCAAGATTTTCATCATTGTACTCTCTGAAAACTACGCATCTTCCTCCTTTTGCCTAAACGAACTCACTCACATCCTTAACTTTACTAAGGGGAAGAATGATGTGTTGGTTTTGCCAGTTTTTTATAAAGTGGATCCTTCAGATGTCCGAAAACACAGAGGTAGTTTTGGAGAAGCACTGGCTAATCATGAAAAGAAGTTGAACTCTAATAACATG…	MALRSFSYDVFLSFRGEDTRYGFTGNLYNVLRERGIHTFIDDQELQKGDQITKALEEAIEKSKIFIIVLSENYASSSFCLNELTHILNFTKGKNDVLVLPVFYKVDPSDVRKHRGSFGEALANHEKKLNSNNMEKLETWKMALHQVSNISGHHFQRDGGKYEYKFIKEIVELVSSKFNRDLLYVSDVLVGLESPVLEVKSLLDVGADDVVHMVGIHGLGGVGKTTLAVAVYNSIARHFEASCFLENVRETSNKKGLQHLQSILLSKIVRDKKIKLTNWREGTHIIKHKLKQKKVLLILDDVNEHIQLQAIIGSPDWFCRGSRVIITTRDEHLLALHNVKKIYMLRELNKKYALQLLIQKAFELEKEVDPSYHDILNRAVTYASGLPLALEVIGSNLFGK…
HK_NBARC_NBARC.Chr16.31	Chr16	TGFam.AUG	30157159	30158921	ATGGCTATGAGACCATCCTCATCTTCATTTAGTTACAGATTCACCTATGACATGTTCCTTAGCTTCCGAGGGGAAGATACTCGTTGTGGTTTCAGTGGCAATCTCTACAATGCCCTTCAGGACAGGGGAATTCACACCTTCATCGACTACAAGGAGCTCCAAAGAGGGCATGAAATCACATCAGCACTTGAGAAGGGAATTGAAGTGTCCAGAATTTTCATCATCGTGCTCTCCCAAAACCATGCATCTTCCTCCTTTTGCTTAAATAAACTTGCTTACATCCTTAACTTTATTAAGGGGAAGGGGACAGATATGAATGAGTTTATTAAGAGGATAGTTGACTTGGTTTCAAGCAAGATTAATCATGCTCCTTTACATGTTGCGGACTACCCAGTTAGA…	MAMRPSSSSFSYRFTYDMFLSFRGEDTRCGFSGNLYNALQDRGIHTFIDYKELQRGHEITSALEKGIEVSRIFIIVLSQNHASSSFCLNKLAYILNFIKGKGTDMNEFIKRIVDLVSSKINHAPLHVADYPVRPESQVLNVMPLLDVGSDDVVHMVGIHGLGGVVGEKEIMLTSVKQGISIIQCRFRWKKVLLILDDVNKREQLQAIVGRPDWLGPGSRVTITTQDKQLLACHGVKRTYEVELLNDEDALRLLCWKAFNLEKYKVDSCYEDVLIRAITYA*
HK_NBARC_NBARC.Chr16.32	Chr16	TGFam.PM	30197383	30200429	ATGCAACCATCCTCATCTTCCTTTGGTTATGGATTCACCTACGATGTGTTCCTTAGCTTCAGAGGGGAAGATACTCGTTACGGTTTCACTGGCAATCTCTACAAAGCTCTTTATGACAAGGGAATTCACACCTTCATCGATGAGGAGCTGCAGAGAGGGGACAAAATCACCTCAACACTTGAGAAGGCAATTCAAGACTATGCATCTTCCCCCTTTTGCCTAAACGAACTTGCTTACATCCTTAACTTTATTAAGGGGAACCGTCAGTTGGTTTTGCCTGTTTTTCATAATGTGGATACTTCTCATGTGCGACACCACACAGGTAGCTTTGAACAGAAGAACAACGTGGAGAAGCTGGACACATGGAAGATGGCTCTGCATCAAGCAGCTAGCTTGTCT…	MQPSSSSFGYGFTYDVFLSFRGEDTRYGFTGNLYKALYDKGIHTFIDEELQRGDKITSTLEKAIQDYASSPFCLNELAYILNFIKGNRQLVLPVFHNVDTSHVRHHTGSFEQKNNVEKLDTWKMALHQAASLSGYHFKHGDGYEYQFINRIVELVSSKINRVPLHVADYPVGLESPMLEVKSLLLDVGSDDVILMVGIQGLGGVGKTTLAVAVYNSIADNFEALCYLENSRETSNKHGILHLQSNLLSETIGEKEIKLTSVKQGISVIQHSSSKRTIVGRPDWFGPGSRVIINTRDKHLLACHGKDVLQLLSWKAFKSEEVDRCFEDVLNRAVTYALGLPLALEVIGFNLFGKSIKQWGSALNRYERIPNKKSQEILKVSYDALEKDEQSIFLDIVCCF…
HK_NBARC_NBARC.Chr16.33	Chr16	TGFam.ISGAP	31273058	31276978	ATGTCCTCCTCTTCCTTTAGCTATGGATGGAAATATGATGTGTTCCTCAGCTTCAGAGGCTCTGATACTCGCCATGGTTTTACTGGTCATCTCTACAAAGCTCTGTGTGATAGAGGAATCCACACCTTCATTGATGATGAAGAGCTTCAAAGAGGAGAAGAGATCACACCATTACTTGTCAAGGCAATTGAAGGGTCCAGGATTGCCATCCCTGTGTTCTCTAAGAACTATGCTTCTTCCACTTTTTGCTTAGATGAACTTGTCCACATCCTTGCCTGTGTTAAGGAAAAGGGTACACTGGTTTTACCAGTTTTTTATGAGGTTGATCCCTCTGATGTACGACATCAAAGAGGTAGCTACAAAGATGCACTGAATAGCCATAAGGAGAGGTTCAATGAT…	MSSSSFSYGWKYDVFLSFRGSDTRHGFTGHLYKALCDRGIHTFIDDEELQRGEEITPLLVKAIEGSRIAIPVFSKNYASSTFCLDELVHILACVKEKGTLVLPVFYEVDPSDVRHQRGSYKDALNSHKERFNDDQEKLQKWRNSLSQAANLAGYHFKHGIENEYEYDFIGNIVKEVSQKINRTVLHVADYTVGLEFRMKEVNSLLNFKSGGVHMVGIHGVGGVGKTTLARAIYNLIADQFEVLCFLDNVRENSIKNGLVHLQETLLSKTIGEKGIKLGSINEAIPIIKHRLHRKKVLLVLDDVDKPDQLHAIAGGMDWFGSGSRVIITTRNRHLLTCHGVESIYEVHGLNHKEALELLSWSAFKTGKVDPCYVNILNRAVTYASGLPLALKVIGSNLIG…
HK_NBARC_NBARC.Chr16.34	Chr16	TGFam.ISGAP	31277936	31281463	ATGTCCTCCACTTCCTTTAGCAATGGATGGAAATATGATGTTTTCCTCAACTTCAGAGGCTCTGATACTCGCTATGGTTTTACTGGTCATCTCTACAAAGCTCTGTGTGATAGAAAAGTCCGCACCTTCATTGATGATGAGGAGCTTCAAAGAGGAGAACAGATCACACCATCACTCTTGAAGGCAATTGAAGAGTCCAGGATTTTCATCCCAGTGTTCTCCAAGAACTATGCCTCTTCCACTTTTTGCTTAGATGAACTTGTCCACATCTTTGCCTGTGTTAAGGAAAAGAGTAGATTAGTTTTGCCGGTTTTTTATGAGGTTGATCCTTCTCATGTACGACATCAAAGAGGTAGCTACAAAGAAGCACTGAATAGCCATAAGAAGAGGTTCAATGAT…	MSSTSFSNGWKYDVFLNFRGSDTRYGFTGHLYKALCDRKVRTFIDDEELQRGEQITPSLLKAIEESRIFIPVFSKNYASSTFCLDELVHIFACVKEKSRLVLPVFYEVDPSHVRHQRGSYKEALNSHKKRFNDDQEKLQKWRNALSQAANLSGYHFKQGKEEYEYDFIAKIVKEVSQKINRTLLHVADFPVGLEYRMQDVNSLVNIESGGVHMIGIHGVGGVGKSTLARAIYNLIADQFEGYCFLNVREYSMQNGLVHLQKKLLSKTIGEKC*
HK_NBARC_NBARC.Chr16.35	Chr16	TGFam.ISGAP	31308270	31309232	ATGGTAGGAATCCATGGAATTGGTGGGGTAGGAAAAACAACAATTGCTCGAGCAGTTTATAATTTGATTGCTGATCAATTTGAAGGGTTGTGTTTTCTTGATAATGTGAGAGAAAACTCAATTAAACATGGATTGGTGCATCTCCAAGAGACACTTCTTTCTAAAACAGTTGGAGACAGTAGTATTAAGTTAGGAAGTGTTCACGAAGGAATTCCAATAATAAAGCATAGGTTCAACCTAAAGAAGGTTCTTTTGGTTATTGATGATGTTGACGATCTAAATCAGTTGCAGGCAACTGTTGGAGGGACCGATTGGTTTGGTTCTGCCAGCAGAGTCATCATTACCACTCGAGACAAGCATTTACTAACATGCCATGGGGTTACAAGCACATATGAGGTT…	MVGIHGIGGVGKTTIARAVYNLIADQFEGLCFLDNVRENSIKHGLVHLQETLLSKTVGDSSIKLGSVHEGIPIIKHRFNLKKVLLVIDDVDDLNQLQATVGGTDWFGSASRVIITTRDKHLLTCHGVTSTYEVDGLNKEEALKLLSGTAFKIDKVDPCYMRILNRVVTYASGLPLALMVIGSNLFGKSIEEWESSIDQYERIPNKKIQGVLKVSFDSLEEDEQQIFLDIACCFKGYHLSRIKEILFSHHGFCPQYAIGVLTDKTLIKINEYGCVTMHDLIEDMGKEIVRQESPEEPGNRSRLWCPEDIVQVLEENKVTLI*
HK_NBARC_NBARC.Chr16.36	Chr16	TGFam.ISGAP	31315844	31319446	ATGTCCTCCTCCTCCATTAGCTATGGATGGAAATATGATGTGTTCCTCAGCTTCAGAGGTTCTGATACTCGCCATGGTTTTACTGGTCATCTCTACAAAGCTCTCTTAGACAGAGGAATCTACACCTTTATTGACAATGAGGAGCTTCAAAGAGGAGAAGAGATCACACCATCACTTGTCAAGGCAATTGAAGACTCTAGGATTGGCATCCTTGTTTTCTCTAAGAACTATGCTTCTTCCACGTTTTGCTTAGATGAACTTGTACACATCCTTGCCTGTGTTAAAGAAAAGGGTACAATGGTTTTACCGGTTTTTTATGAGGTTGATCCCTCTGATGTACGACACCAAAGAGGTAGCTACGAAGAAGCACTGAATAAACATAAGGAGAAGTTCAATGAC…	MSSSSISYGWKYDVFLSFRGSDTRHGFTGHLYKALLDRGIYTFIDNEELQRGEEITPSLVKAIEDSRIGILVFSKNYASSTFCLDELVHILACVKEKGTMVLPVFYEVDPSDVRHQRGSYEEALNKHKEKFNDDKEKLQKWRIALRQAANLSGYHFKHGNENEYDFVGKIIKEVSRRISRTHLHVANNLVGLESRVLHVTSLLDDKYDGVLMVGIHGIGGVGKTTIAREVYNLIADQFEWLCFLDNVRENSIKHGLVHLQKTLLSKTIGESSIKLGSVHEGIPIIKHRFHLKKVLLVVDDVDDLDQLQAIVGGTDWFGSGSRVIITTRDKHLLTCHGVTSTYEVDGLNKEEALKLLSGTAFKIDKVDPCYMRILNRVVTYASGLPLALMVIGSNLFGKS…
HK_NBARC_NBARC.Chr16.37	Chr16	TGFam.AUG	31323015	31341342	ATGGCAGAAAGAGCAGAACCATCCTCGTCTTCCTTCGCAGACAAATGGAATTTTTATGATGTCTTCCTCAGTTTTAGAGGCAAAGACACTCGTCAAAATTTCACTGGCCATCTCTACAATTCTCTATTCAAAAATGGAATTCTTACTTTCATAGATGATAAAGGGCTTAGGAGGGGGGAAGAAATTACACCAGCTCTTCTCAATGCCATTAAGAATTCAAGGATTGCCATCATTGTTTTCTCAGAGGACTATGCATCCTCAACTTATTGCTTGGATGAACTTGTCACGATCCTTGAGAGCTTCAAGGAAGAAGAGGGTCGATCAATTTATCCAATATTTTATTATGTGGATCCATCACAAGTTCGGCATCAAACAGGGACTTATTCAGATGCATTGGCA…	MAERAEPSSSSFADKWNFYDVFLSFRGKDTRQNFTGHLYNSLFKNGILTFIDDKGLRRGEEITPALLNAIKNSRIAIIVFSEDYASSTYCLDELVTILESFKEEEGRSIYPIFYYVDPSQVRHQTGTYSDALAKHEERFQYDIDKVQQWRQALYQAANLSGWHFHGSQPEYKFILKIVKEISEKIDCVPLHVADKPIGLEYAVLAVKSLFGLESDVSMIGIYGIGGIGKTTIARAVYNMSFSKFEGICFLPDIREKAINKHGLVELQEMLLSETLKEKDIKVGHVNKGIQIIKQRLQQKKVLLILDDVDKLEQLKVLAGQYDWFGSGSIIIITTRDKHLLATHEVVKLYEVKPLNDEKSLELFDWHAFKNNKTDPSYVTISNRAVSYACGLPLALEVIG…
HK_NBARC_NBARC.Chr16.38	Chr16	TGFam.PM	35170164	35179239	ATGCCTGCAACAACACGTTCCCTTGCATCCATCTATGATGTGTTCCTCAGCTTCAGAGGTTTAGACACACGCCATGGTTTCACTGGCAATCTCTACAAAGCTCTTGATGACAGGGGAATCTACACTTTCATTGATGATCAGGAGCTTCCCAGAGGAGACCAAATAACACCTGCACTTTCCAAGGCAATTCAAGAGTCCAGGATTGCTATTACTGTGCTTTCTGAAAACTATGCTTCTTCCTCGTTTTGTTTAGATGAACTTGTAACCATCCTTCACTGCAAGAGTGAAGGGCTGTTGGTTATACCGGTCTTTTATAAGGTAGATCCTTCTGATGTCAGACACCAGAAAGGTAGTTATGGAGAAGCAATGGCTAAGCATCAGAAGAGCTTCAAAGCTAAG…	MPATTRSLASIYDVFLSFRGLDTRHGFTGNLYKALDDRGIYTFIDDQELPRGDQITPALSKAIQESRIAITVLSENYASSSFCLDELVTILHCKSEGLLVIPVFYKVDPSDVRHQKGSYGEAMAKHQKSFKAKKEKLQKWRMALQQVADLSGYHFKDGDAYEYKFIGSIVEELSRKISRASLHVADYPVGLESPVTEVMKRLDVGSDDVHIIGIHGMGGLGKTTLALAVHNLIALHFDESCFLQNVREESNKHGLKHLQSILLSKLLGEKGITLTSWQEGASMIQHRLRRKKVLLILDDVDKREQLKVIVGRSDWFGPGSRVIITTRDKHLLKHHEVERTYEVKVLNQSAALQLLTWNAFRREKIDPSYEDVLYRVVTYASGLPLALEVIGSNLFGKTV…
HK_NBARC_NBARC.Chr16.39	Chr16	TGFam.ISGAP	36112991	36117888	ATGGCTTGGGGATCAAGTTCCTCTTCCTCTTCCTCTTCCTCCAATTACGATGTGTTCCTCAGCTTCAGAGGTGAAGACACACGTCATGCTTTTACTGGCCATCTCTACAAAGCTCTTCATGACAAGGGAATCCACACTTTCATTGATGATGAGAAGCTTCAAAGAGGGGAGCAAATAACACGAGCACTTATGGAGGCAATTCAAGATTCCAGAGTTGCCATCACTGTGCTTTCTCAAAACTATGCTTCTTCCTCGTTTTGTTTAGATGAACTTGCAACCATCCTTCACTGTCACCAGAGGAAACGGTTGTTGGTTATACCGGTCTTTTATAAGGTGGATCCTTCTGATGTGAGACACCAGAAAGGTAGTTATGCAGAAGCATTGGAAAAGCTTGAGACG…	MAWGSSSSSSSSSSNYDVFLSFRGEDTRHAFTGHLYKALHDKGIHTFIDDEKLQRGEQITRALMEAIQDSRVAITVLSQNYASSSFCLDELATILHCHQRKRLLVIPVFYKVDPSDVRHQKGSYAEALEKLETRFQHDPEKLQKWKMALKQVADLSGYHFKEGDGYEFKFIEKIVERVSREINPRTLHVADYPVGLESRVLDVRRLLDAGSDDGVHMIGIHGMGGLGKSTLARAVYNELIIAEKFDGFCFLANVREKSDKKDGLEHLQRILLSEILGEKNISLTSTQQGISIIQSRLKGKKVLLILDDVNTHGQLQAIGRRDWFGPGSKIIITTRDEQLLAYHEVNETYEMKELNQKDALQLLTWNAFKKEKADPTYVEVLHRVVAYASGLPLALEVIG…
HK_NBARC_NBARC.Chr16.40	Chr16	TGFam.PM	36126653	36135597	ATGGCTTGGGGATCACGTTCCTCTTCCTCTTCCTCCAATTACGATGTGTTCCTCAGCTTCAGGGGTGAAGACACACGTAGTGCTTTTACTGGCCATCTCTACAACACTCTTCAGAGCAAGGGAATCCACACTTTCATTGATGATGAGAAGCTTCAAAGAGGGGAGCAAATAACACCAGCACTTATGAAGGCAATTGAAGATTCCAGAGTTGCCATCACTGTGCTCTCTGAACACTATGCTTCTTCCTCGTTTTGTTTAGATGAACTTGCAACCATCCTTCACTGTGACCAGAGGAAACGGTTGTTGGTTATACCGGTCTTTTATAAGGTGGATCCTTCTGATGTGAGACACCAGAAAGGTAGTTATGGAGAAGCATTGGCAAAGCTTGAGAGGAGGTTC…	MAWGSRSSSSSSNYDVFLSFRGEDTRSAFTGHLYNTLQSKGIHTFIDDEKLQRGEQITPALMKAIEDSRVAITVLSEHYASSSFCLDELATILHCDQRKRLLVIPVFYKVDPSDVRHQKGSYGEALAKLERRFQHDPEKLQNWKMALQRVADLSGYHFKEGEGYEYKFIEKIVEEVSRVINLCPLHVADYPVGLKSRVLHVRRLLHAGSDHGVHMIGIHGMGGVGKSTLARAVYNELIIAEKFDGLCFLANVRENSNKHGLEHLQGKLLLEILGEKSISLTSKQQGISIIQSRLKGKKVLLIIDDVDTHDQLQAIAGRPDWFGRGSKIIITTRDKQLLASHEVNKTYEMKELDENHALQLLTWQAFKKEKADPTYVEVLHRVVTYASGLPLALEVIGSH…
HK_NBARC_NBARC.Chr16.41	Chr16	TGFam.ISGAP	36170882	36177846	ATGACTGTGTCAGCATCCTTCAGCTACGATGTGTTCCTCAGCTTCAGAGGCTCTGATACTCGCTACGGTTTTACTGGCAATCTCTATAATGCTCTAAGTGATAGGGGAATCCATACCTTCATTGATGAAGAGGAGCTTCAAAGAGGTGATGAAATTAGACCGGCACTTGTTGAGGCCATTAAACAGTCTAGGATGGCCATCCTTGTGTTCTCTAAGAACTATGCATCTTCTTCGTTTTGCTTAGATGAACTTGTTAAAATCATGGAGTGTGTTAAGGCAAAGGGTCGGTTGATTTTTCCCATTTTTTATGATGTGGATCCTTGTCATGTGCGGCATCAGTCTGGGAGTTATGGAGAAGCGTTGGCTATGCACGAGGAAAGGTTCACAAGTAGCAAGGAA…	MTVSASFSYDVFLSFRGSDTRYGFTGNLYNALSDRGIHTFIDEEELQRGDEIRPALVEAIKQSRMAILVFSKNYASSSFCLDELVKIMECVKAKGRLIFPIFYDVDPCHVRHQSGSYGEALAMHEERFTSSKENLKENMERLQKWKMALNQAADVSGKHYKLGNEYEHEFIGKIVKEISNKINRTPLHVADYPVGLESRVQTVKSLLEFESDTGVHIVGIYGIGGMGKTTLARAVYNSIADQFKGLCFLDDVRENATKHGLIHLQEMLLSEIVGEKDIKIGSVSKGISIIKHRLQRKKILLILDDVDKLEQLRATVGGPNWFGSGSRVIVTTRDKHLLASHGVDRKYEVEDLNEEESLELLCWNAFKDDKVDPCYKDISSQAVAYASGLPLALEVVGSL…
HK_NBARC_NBARC.Chr16.42	Chr16	TGFam.PM	36201761	36212166	ATGGCTTTGGGATCATGTTCCTCTTCCTTCAACTATGATGTTTTCCTCAGCTTCAGAGGCGCAGACACACGACATGGTTTTACCGGAAATCTTTACAAAGCTCTTGATGACAGGGGAATCTACACTTTCATTGATGATGAGGAGCTCCAGAGTGGAGAGGAAATAACACCAGCACTTCTGAAGGCAATTCAAGAGTCCAGGATTGCCATCACTGTGCTCTCTATAAATTATGCTTCTTCCTCATTTTGCTTAGATGAACTTGCCTACATTCTTGAGTGCTTTAAGAGCAAAAATCTGTTGGTTGTGCCAGTCTTTTATAACGTGGATCCTTCTGATGTCAGACACCAGAAAGGTAGTTATGGAGAAGCATTGGCTAAGCATCAGGAAAGGTTCAACCAC…	MALGSCSSSFNYDVFLSFRGADTRHGFTGNLYKALDDRGIYTFIDDEELQSGEEITPALLKAIQESRIAITVLSINYASSSFCLDELAYILECFKSKNLLVVPVFYNVDPSDVRHQKGSYGEALAKHQERFNHNMEKLEYWKKALHQVANLSGFHFKHGEGYEYEFIGRIVELVSSKINHAPLPVADYPVGLESRLLEVTKLLDVESDDGVYMIGIHGIGGIGKSTLAIAVYNLIACHFDGSCFLKDLREKSNKKGLQHLQSILLREILGEKEINLASVEQGASIIQHRLQRKKVLLILDDVDKHEQLQAIVGRPCWFGPGSRVIITTRDKQLLASHGVKRTYEVELLNENNALQLLTWKSFKTEKVDPSYKEVLNDVVIYASGLPLALEVIGSNLFGK…
HK_NBARC_NBARC.Chr16.43	Chr16	TGFam.PM	36304537	36308296	ATGGCTGCGACAACACGTTCCCTTGCATACAACTACGATGTGTTCCTCAGCTTCACAGGCCAAGACACACGCCAGGGTTTCACTGGCTATCTCTACAAAGCTCTTTGTGACAGGGGAATCTACACTTTCATTGATGATCAGGAGCTTCCGAGAGGAGACGAAATAAAACCTGCACTTTCCAACGCAATTCAAGAGTCCAGGATTGCTATTACTGTGCTTTCTCAAAACTATGCATCTTCCTCATTTTGTTTAGATGAACTAGTAACCATCCTTCACTGCAAGAGTCAAGGGCTGTTGGTTATACCGGTCTTTTATAAGGTAGATCCTTCTCATGTCAGACACCAGAAAGGTAGTTATGGAGAAGCAATGGCTAAGCATCAGAAGAGGTTCAAAGCTAAC…	MAATTRSLAYNYDVFLSFTGQDTRQGFTGYLYKALCDRGIYTFIDDQELPRGDEIKPALSNAIQESRIAITVLSQNYASSSFCLDELVTILHCKSQGLLVIPVFYKVDPSHVRHQKGSYGEAMAKHQKRFKANKEKLQKWRMALHQVADLSGYHFKDGDSYEYEFIGSIVEEISRKFSRASLHVADYPVGLESEVTEVMKLLDVGSHDVVHIIGIHGMGGLGKTTLALAVHNFIALHFDESCFLQNVREESNKHGLKHLQSILLSKLLGEKDITLTSWQEGASMIQHRLQRKKVLLILDDVDKREQLKAIVGRPDWFGPGSRVIITTRDKHLLKYHEVERTYEVKVLNQSAALQLLTWNAFKREKIDPSYEDVLNRVVTYASGLPLALEVIGSNLFEKT…
HK_NBARC_NBARC.Chr16.44	Chr16	TGFam.PM	36309808	36314590	ATGGCTGCAACAACACGTTCCCTTGCATCCATCTACGATGTGTTCCTCAACTTCAGAGGGGAAGACACGCGCTATGGTTTTACTGGCAATCTCTACAAGGCTCTTTGTGACAAGGGAATTCATACCTTCTTTGACGAAGACAAGCTTCACAGCGGAGACGACATAACACCTGCACTTTCCAAGGCAATTCAAGAGTCCAGGATTGCTATTACTGTGCTTTCTCAAAACTATGCTTCTTCCTCGTTTTGTTTAGATGAACTTGTAACCATCCTTCACTGCAAGAGGGAAGGGTTGTTGGTTATACCGGTCTTTCATAACGTAGATCCTTCTGCTGTCAGACACCTGAAAGGTAGTTATGGAGAAGCAATGGCTAAGCATCAGAAGAGGTTCAAAGCTAAG…	MAATTRSLASIYDVFLNFRGEDTRYGFTGNLYKALCDKGIHTFFDEDKLHSGDDITPALSKAIQESRIAITVLSQNYASSSFCLDELVTILHCKREGLLVIPVFHNVDPSAVRHLKGSYGEAMAKHQKRFKAKKEKLQKWRMALHQVADLSGYHFKDGDAYEYKFIGNIVEEVSRKINCAPLHVADYPVGLGSQVIEVMKLLDVGSDDLVHIIGIHGMGGLGKTTLALAVYNFIALNFDESCFLQNVREESNKHGLKHLQSILLSKLLGEKDITLTSWQEGASMIQHRLRRKKVLLILDDVDKREQLEAIVGRSDWFGPGSRVIITTRDKHLLKYHEVERTYEVKVLNHNAALQLLTWNAFKREKIDPIYDDVLNRVVTYASGLPLALEVIGSDLFGKT…
HK_NBARC_NBARC.Chr16.45	Chr16	TGFam.ISGAP	36315796	36321791	ATGGCTGCGGCAACACGTTCTCGTGCATCAATCTACGATGTTTTCCTCAGCTTCAGAGGGGAAGACACACGCTATGGTTTTACTGGCAATCTCTACAAGGCTCTTTGTGACAAGGGAATTCATACCTTCTTTGACGAAGACAAGCTTCACAGTGGAGAGGAAATAACACCAGCACTTTTGAAGGCAATTCAAGATTCCAGGATTGCCATCACTGTGCTCTCTGAAGACTTTGCTTCTTCCTCATTTTGCTTGGATGAACTTGCAACCATCCTTTTCTGCGCCCAGTATAATGGGATGATGGTTATACCGGTCTTTTATAAGGTCTATCCTTGTGATGTCAGACACCAGAAAGGTACTTATGGAGAAGCATTGGCTAAGCATAAGAAAAGATTTCCAGAC…	MAAATRSRASIYDVFLSFRGEDTRYGFTGNLYKALCDKGIHTFFDEDKLHSGEEITPALLKAIQDSRIAITVLSEDFASSSFCLDELATILFCAQYNGMMVIPVFYKVYPCDVRHQKGTYGEALAKHKKRFPDKLQKWERALRQVANLSGLHFKDRDEYEYKFIGRIVASVSEKINPASLHVADLPVGLESKVQEVRKLLDVGNHDGVCMIGIHGMGGIGKSTLARAVYNDLIITENFDGLCFLENVRESSNNHGLQHLQSILLSEILGEDIKVRSKQQGISKIQSMLKGKKVLLILDDVDKPQQLQTIAGRRDWFGPGSIIIITTRDKQLLAPHGVKKRYEVEVLNQNAALQLLTWNAFKREKIDPSYEDVLNRVVTYASGLPLALEVIGSNMFGKRV…
HK_NBARC_NBARC.Chr16.46	Chr16	TGFam.ISGAP	36331116	36334964	ATGGCTGCAACAACACGTTCCGGTGCATCCATCTACGATGTGTTCCTAAACTTCAGAGGGGGAGACACACGCTATGGTTTCACTGGCAATCTGTACAGGGCTCTTTGTGACAAGGGAATTCATTCCTTCTTTGACGAAAAGAAGCTTCACAGAGGAGAGGAAATAACACCTGCACTTTTGAAGGCAATTCAAGAGTCCAGGATTGCTATTACTGTGCTTTCTAAAAACTATGCTTCTTCCTCATTTTGTTTAGATGAACTTGTAACCATCCTTCACTGCAAGAGTGAAGGGCTGTTGGTTATACCGGTCTTTTACAACGTAGATCCTTCTGATGTCAGACACCAGAAAGGTAGTTATGGGGTAGAAATGGCTAAGCATCAGAAGAGGTTCAAAGCTAAG…	MAATTRSGASIYDVFLNFRGGDTRYGFTGNLYRALCDKGIHSFFDEKKLHRGEEITPALLKAIQESRIAITVLSKNYASSSFCLDELVTILHCKSEGLLVIPVFYNVDPSDVRHQKGSYGVEMAKHQKRFKAKKEKLQKWRIALKQVADLCGYHFKDGDAYEYKFIQSIVEQVSREINRAPLHVADYPVGLGSQVIEVRKLLDVGSHDVVHIIGIHGMGGLGKTTLALAVYNLIALRFDESCFLQNVREESNKHGLKHLQSILLSKLLGEKDITLTSWQEGASMIQHRLQRKKVLLILDDVDKREQLKAIVGRPDWFGPGSRVIITTRDKHLLKYHEVERTYEVKVLNQSAALQLLKWNAFKKEKIDPSYEDVLNRVVTYASGLPLALEVIGSNLFGKT…
HK_NBARC_NBARC.Chr16.47	Chr16	TGFam.PM	36349166	36351286	ATGGCTGCAACAACACGTTCCCTTCCATTCATCTATGATGTGTTCCTCAGCTTCAGAGGGGAAGACACACGCTATGGTTTCACTGGCAATCTATACAGGGCTCTCTGTGAGAAGGGAATTCATACCTTCTTTGATGAAGAGAAGCTTCACGGTGGAGATGAAATAACACCTGCACTTTCGAAGGCAATTCAAGAGTCCAGGATTGCTATTACTGTGCTTTCTCAAAACTATGCTTTTTCCTCATTTTGTTTAGATGAACTTGTAACCATCCTTCACTGCAAGAGTGAAGGGCTGTTGGTTATACCGGTCTTTTACAACGTAGATCCTTCTGATCTCAGACACCAGAAAGGTAGTTATGGAGAAGCAATGACTAAGCATCAGAAAAGGTTCGAATCTAAG…	MAATTRSLPFIYDVFLSFRGEDTRYGFTGNLYRALCEKGIHTFFDEEKLHGGDEITPALSKAIQESRIAITVLSQNYAFSSFCLDELVTILHCKSEGLLVIPVFYNVDPSDLRHQKGSYGEAMTKHQKRFESKMEKLQKWRMALKQVADLSGHHFKDGDAYEYKFIGSIVEEVSRKINRASLHVPDYPVGLESQVTDLMKLLDVGSDDVVHIIGIHGMRGLGKTTLALAVYNLIALHFDESCFLQNVREESNKHGLKHLQSILLLKLLGEKDINLTSWQEGASMIQHRLRRKKVLLILDDADRHEQLKAIVGRPDWFGPGSRVIITTRDKHLLKYHGIERTYEVKVLNHNAALQLLTWNAFRREKIDPSYEHVLNRVVAYASGLPLALEVIGSHLFEKT…
HK_NBARC_NBARC.Chr16.48	Chr16	TGFam.ISGAP	36359766	36365521	ATGGCTGCAACGACACGTTCCCTTGCATCCATCTACGATGTGTTCCTCAGCTTTAGAGGGGAAGACACACGCCATGGTTTCACTGGCAACCTCTACAAAGCTCTTGATAACAGGGGAATCTACACTTTCATTGATGATCAGGAGCTTCCCAGAGGAGACGAAATAACACCTGCACTTTCCAAGGCAATTCAAGAGTCCAGGATTGCTATTATTGTGCTTTCTCAAAACTATGCTTCTTCCTCGTTTTGTTTAGATGAACTTGTAACCATCCTTCACTGCAAGAGTGAAGGGCTGTTGGTTATACCGGTCTTTTATAAGGTAGATCCTTCGGATGTCAGACACCAGAAAGGTAGTTATGGAGAAGCAATGGCTAAGCATCAGAAGAGGTTCAAAGCTAAG…	MAATTRSLASIYDVFLSFRGEDTRHGFTGNLYKALDNRGIYTFIDDQELPRGDEITPALSKAIQESRIAIIVLSQNYASSSFCLDELVTILHCKSEGLLVIPVFYKVDPSDVRHQKGSYGEAMAKHQKRFKAKKEKLQKWRMALKQVADLSGYHFEDGDAYEYKFIGSIVEELSRKISRASLHVADYPVGLESQVTKVMKLLDVASHDVVHIIGIHGMGGLGKTTLAREVYNLIALPFDESCFLQNVREESNKHGLKHLQSILLLKLLGEKDITLTSWQEGASMIQHRLRRKKVLLILDDVDKREQLKAIVGRPDWFGPGSRVIVTTRDKHLLKYHGVERTYEVKVLNHNAALQLLTRNAFKRGKIDPSYEDVLYRVVTYASGLPLALEVIGSNLFEKT…
HK_NBARC_NBARC.Chr16.49	Chr16	TGFam.ISGAP	36387646	36391878	ATGGCTGCAACGACACGTTCCCTTGCATCCATCTATGATGTGTTCCTCAACTTCAGAGGGGAAGACACGCGCTATGGTTTTACTGGCAATCTCTACAAGGCTCTTTGTGACAAGGGATTTCATACCTTCTTTGACGAAGACAAGCTTCACAGCGGAGAGGAAATAACACCTGCACTTTTGAAGGCAATTCAAGATTCCAGGATTGCTATTATTGTGCTTTCTGAAAACTATGCTTTTTCCTCATTTTGTTTAGATGAACTTGTAGCCATCCTACACTGCAAGAGGGAAGGGCTGTTGGTTATACCGGTCTTTTACAAAGTAGATCCTTCTGATGTTAGACACCAGAAAGGTAGTTATGGAGAAGCAATGACTAAGCATCACGAAAGGTTCAAAGATAAG…	MAATTRSLASIYDVFLNFRGEDTRYGFTGNLYKALCDKGFHTFFDEDKLHSGEEITPALLKAIQDSRIAIIVLSENYAFSSFCLDELVAILHCKREGLLVIPVFYKVDPSDVRHQKGSYGEAMTKHHERFKDKMEKLQKWRMALHQVGHLSGKHFKDGDAYEYKFIGSIVEELSRKINRASLHVADYPVGLESQVTEVMKLLDVGSHDGVHIIGIHGMGGLGKTTLALAVYNFIALHFDESCFLQNVREESNKHGLKHLQSILLSKLLGEKDIILTSWQEGASMIQRRLRRKKVLLILDNADEQEQLMAIVGSPNCFGPGSRVIITTRDKHLLKYHGVERTYEVKVLNHNAALQLLTRNAFKREKIDPSYENVLNRVVAYASGLPLALEVIGSDLFGKT…
HK_NBARC_NBARC.Chr16.50	Chr16	TGFam.ISGAP	36392321	36398048	ATGGCTGCTACAACACGTTCCCTTGCATCCAAATACGATGTGTTCCTCAACTTCAGAGGGGAAGACACGCGCCATGGTTTTACTGGCAATCTCTACAAGGCTCTTCATGACAGGGGAATCTACACTTTCAATTATGAGCTGGAGCTTCTGAGAGGAGAGAAAATAGTACCTGCACTTTCCAAGGCAATTCAAGAGTCCAGGATTGCTATTACTGTGCTTTCTGAAAACTATGCTTATTCCTCATTTTGTTTAGATGAACTTGTAACCATCCTTGACTACAAGAGTGAAGGGCTGTTGGTTATACCGGTCTTTTACAAAGTAGATCCTTATTATGTCAGCCACCAGCGAGGTAGTTATGGAGAAGCAATGGCTAAGCATGAGAAAAGGTTCGAATCTAAG…	MAATTRSLASKYDVFLNFRGEDTRHGFTGNLYKALHDRGIYTFNYELELLRGEKIVPALSKAIQESRIAITVLSENYAYSSFCLDELVTILDYKSEGLLVIPVFYKVDPYYVSHQRGSYGEAMAKHEKRFESKMEKLQKWRTALHQVADLSGYHFEDGDAYEFKFIESIVEELSRKISRATLPVGDYQVGLESQVTEVMKLLDVGSHDGVHIIGIHGIGGLGKTTLALAVYNLIALQFDESCFLENVREESNKHGLKHLQSIIISKLLGEKDINLTSWQEGASMIQSRLRRKKVLLILDDVNKREQLKAFVRRSDWFGPGSRVIITTRDKHILKYHEVERTYEVKVLNQSAALQLLKWNAFKREKIDPSYEDVLNRVVAYASGLPLALEVIGSALFEKT…
HK_NBARC_NBARC.Chr16.51	Chr16	TGFam.PM	36403304	36408292	ATGGCTGCAACAACACGTTCTCCTGCATCCATCTATGATGTGTTCCTCAGCTTCAGAGGTTTAGACACACGCCATGGTTTCACTGGAAATCTCTACAAAGCTCTTGATGACAGAGGAATCTACACTTTCATTGATGATCAGGAGCTTCCAAGAGGAGACGAAATAACACCTGCACTTTCCAAGGCAATTCAAGAGTCCAGGATTGCTATTACTGTGCTTTCTCAAAACTATGCTTCTTCCTCGTTTTGTTTAGATGAACTTGTAACCGTCCTTCTCTGCAAGAGGAAAGGGCTGTTGGTTATACCGGTCTTTTATAACGTAGATCCTTCTGATGTCAGACAACAGAAAGGTAGTTATGGAGAAGCAATGGCTAAGCATCAGAAGAGGTTCAAAGCTAAG…	MAATTRSPASIYDVFLSFRGLDTRHGFTGNLYKALDDRGIYTFIDDQELPRGDEITPALSKAIQESRIAITVLSQNYASSSFCLDELVTVLLCKRKGLLVIPVFYNVDPSDVRQQKGSYGEAMAKHQKRFKAKKEKLQKWRMALHQVADLSGYHFKDGDAYEYKFIQSIVEQVSREINRTPLHVADYPVGLGSQVIEVRKLLDVGSHDVVHIIGIHGMGGLGKTTLALAVYNLIALHFDESCFLQNVREESNKHGLKHLQSIILSKLLGEKDINLTSWQEGASMIQHRLQRKKVLLILDDVDKRQQLKAIVGRPDWFGPGSRVIITTRDKHILKYHEVERTYEVKVLNQSAALQLLKWNAFKREKNDPSYEDVLNRVVTYASGLPLALEIIGSNLFGKT…
HK_NBARC_NBARC.Chr16.52	Chr16	TGFam.PM	36419275	36420652	ATGGCTGCAAAAACACGTTCCCTTGCATCCATCTACGATGTGTTCCTCAGCTTCAGAGGGGAAGACACACGCCATGGTTTCACTGGCAATCTCTACAAAGCTCTTGATGACAGGGGAATCTACACTTTCATTGATGATCAGGAGCTTCCCAGAGGAGACCAAATAACATCTGCACTTTCCAAGGCAATTCAAGAGTCCAGGATTGCTATTACTGTGCTTTCTCAAAACTATGCTTCTTCCTCGTTTTGTTTAGATGAACTTGTAACCATCCTTCACTGCAAGAGGAAAGGGTTGTTGGTTATACCGGTCTTTTACAAAATAGATCCTTCTGATGTCAGACACCAGAAAGGTAGTTATGGAGAAGCAATGGCTAAGCATCAGAAGAGGTTCAAAGCTAAG…	MAAKTRSLASIYDVFLSFRGEDTRHGFTGNLYKALDDRGIYTFIDDQELPRGDQITSALSKAIQESRIAITVLSQNYASSSFCLDELVTILHCKRKGLLVIPVFYKIDPSDVRHQKGSYGEAMAKHQKRFKAKKLQKWRMALQQVADLSGYHFKDGDSYEYKFIGSIVEEVSRKINRAYLHAVDYPFGQWSQVMEVRKLLDVGSHDVVHIIGIHGMGGLGKTTLALAVYNLIAHHFDKSCFLENVREESNKHGLKHLQSILLSKLLGEKDINLTSWQEGASMIRHRLRRKKILLILDDVDKREQLKAIVGRSDWFGPGSRVIITTRDKHLLKYHQVERTYEVTKSLVNTSILVISLIKSLVRLIGRITGIGNNKAPVTGSTKKKNRGCKEDFA*
HK_NBARC_NBARC.Chr17.1	Chr17	TGFam.PM	17038378	17041874	ATGGAAGAGATGGCACAACAAGTAAAGCGTCCTTTTGGTGTTCCTGAAGAGCCAGAATTCACTGTTGGGTTGGATGCACCATTGAGGGAGTTGAAAATGGAACTTCTTAAAGAAGGTGTGTCCATCATTGTGCTGACTGGTTTAGGTGGATCGGGAAAAACCACTTTGGCTACAAAGCTTTGTTGGGATGAACAAGTCATAGGTTCATTCAAGGAAAATATTTTATTTGTCACCTTCTCAAAAACACCTAAGCTGAAGATTATCGTCGAAAGACTATTTGAATATTGTGGATATCAGGTGCCTCAGTTTCAAAGCGATGAAGATGTGGTTAATCAATCGGGACTTTTGCTGAGGAAAATTGATGCAAGTCCTATGTTGTTGGTCCTGGATGATGTCTGG…	MEEMAQQVKRPFGVPEEPEFTVGLDAPLRELKMELLKEGVSIIVLTGLGGSGKTTLATKLCWDEQVIGSFKENILFVTFSKTPKLKIIVERLFEYCGYQVPQFQSDEDVVNQSGLLLRKIDASPMLLVLDDVWPGSEPLVEKFKVQMPDYKILVTSRVAFPRFGSPYILKPLVHEDAMALFCHHTLLGKNSSNIPEEVVQKIVRHCKGLPLAIKVIGRSLSNQPYELWQKMVEKLSQGHSILDSNTKLVASLKKISDVLEDNSIIKECFIDLALFPENQKIPVAALVDMWVELYGLDNDGIVMANVNKLASMNLANVLETRKNTSDTDSYYYNNHFIILHGILRDITIYQGTQEQVELRKRLMIGITENKTEWWLIREKQQGMMIRILSISTDETCTSY…
HK_NBARC_NBARC.Chr17.2	Chr17	TGFam.ISGAP	17098888	17102847	ATGAGCCATTATCTCAAAGAGAAAGGAGGTCCTAGGTTGGTTATCATGGGAGAGACCAAACAACTTGTTACCCTTTTGACACAATTTCAAGAGGCAATGAGGATGGTCAAGGATATAGTGGAAAAAAGCAGATCGAGTAAAACGAGCAAACGATTACTAAGGAAAACCCTCAAGAATATGACTCCTCTACTGCAGGAAATCAATCAATACAATGAACACTTGGACCCACCCAGAGAAGAAATCGACACTCTTATCAAAGAAAAAGACGCCGTAGAAGAGATTGTGTGCTGCTATTCCTGCTCCAGGAGCATTTGGTGGACCAAATTATTCTCTTGGCTTCCACTCTACGGGGATAAATTTTGGAATAACAAGAATTATTCCCTTGCTGCAGATGACAAC…	MSHYLKEKGGPRLVIMGETKQLVTLLTQFQEAMRMVKDIVEKSRSSKTSKRLLRKTLKNMTPLLQEINQYNEHLDPPREEIDTLIKEKDAVEEIVCCYSCSRSIWWTKLFSWLPLYGDKFWNNKNYSLAADDNQVKYIKNTLYKVKEVLERLDIENFQLKLKGVGSPIKCPFGVPENPEFTVALDLPLSKLKMEVIRDGMSTLLLTGLGGSGKTTLATKLCRDEEVKGKFKENILFLTFSQTPKLKSIVERLFDHCGYHVPEFISDEDAIKRLGILLRKIEGSPLLLVLDDVWPGSEALIEKFQFQMSDYKIVVTSRVAFPKFGTPYVLKPLAHEDAMTLFRHHALLEKSSSSIPDEELVQKVVRYCKGLPLAIKVIGRSLSHRPIEMWQKMVEEFSQG…
HK_NBARC_NBARC.Chr17.3	Chr17	TGFam.PM	19304977	19308259	ATGGAAGAGACGGCACAACAAGTAAAACGTCCTTTTGATGTTCCTGAAGAACCAGAATTCATTGTTGGGTTGGATGCACCATTGAGTGAGTTGAAAATGGAACTTCTTAAAGAAGGCGTGTCCATCATTGTGCTGACTGGTTTAGGTGGATCGGGAAAAACCACTTTGGTTACAAAGCTTTGTTGGGATGAACTAGTCATAGGTAAATTCAAGGGAAATATTTTATTTGTCACCATCTCAAAAACGCCTAAGCTGAAGATTATCATCGAAAGACTATTTGAATATTATGGGTGTCAAGTGCCTGCGTTTCAAAGCGATGAAGATGCAGTTAATCATTTGGGAATTTTGCTGAGGAAAATTGATGTAAGTCCAATGTTGTTGGTCTTGGATGATGTTTGG…	MEETAQQVKRPFDVPEEPEFIVGLDAPLSELKMELLKEGVSIIVLTGLGGSGKTTLVTKLCWDELVIGKFKGNILFVTISKTPKLKIIIERLFEYYGCQVPAFQSDEDAVNHLGILLRKIDVSPMLLVLDDVWPGSEGFIEKVKVQISDYKILVTSRVAFPRFGTPFILKNLVHEDAMTLFRHHALLEKNSSNIPEEVVQKIVRHCKGLNLPLVIKVIGRSLSNRPYELWQKMVEQLSQGHSILDSNTELLTSFQKILDVLEDNPTIKECFMDLALFPEDQRIPVAALVDMWVELYGLDNDGIETVAIVNKLASMNLVNVLVTRKNTSDTDSYYYNNHFIILHDILRDFGIHQSNQEQVEQRKRLMIDITENKPEWWPREKQIPAQTLSISTDETCTSY…
HK_NBARC_NBARC.Chr17.4	Chr17	TGFam.PM	19391949	19396507	ATGGAAGAGACCGCACAACTAGTTGTCTTTCCAATGAAGAGTGCATTTGGTGTTCCTGAAACGCCAGAATTCAGTGTTGGATTGGATGTACCATTGAGCCAGTTGAAGATCGAGCTTCTTAAAGAAGGTGTCTCCATTATTGTGTTAAGTGGTTTTGGAGGATTAGGGAAAACCACCTTGGCTACAAAGCTCTGTTGGGATGAACAAGTCATGGTACCTAAGTTTCAAAGCAATGAAGATGCACTTAGTCAATTGGGGCTTTTGCTAAGGAAATTTGAAGGAATTCCAATGTTGTTGATTTTGGATGATGTTTGGCCTGGCTCAGAAGCCCTTGTAGAGAAATTTAAATTCCATTTATCAGATTACAAAATTCTGGTGACTTCAAGGGTTGCATTTCAT…	MEETAQLVVFPMKSAFGVPETPEFSVGLDVPLSQLKIELLKEGVSIIVLSGFGGLGKTTLATKLCWDEQVMVPKFQSNEDALSQLGLLLRKFEGIPMLLILDDVWPGSEALVEKFKFHLSDYKILVTSRVAFHRFGIQCVLKPLVYEDAMTLFHHYALLDCNSLNTPDEDVVQKVVKSCKGLPLAIKVIGRSLSHQPFELWQKMVEELSHGHSILDSNSTELLTYLQKILDVLEDNTMIKECFMDLSLFPEDQRISITALIDMWAELYGLDNDGIEAMAIINKLESMNLVNVLIARQNTSDTDNCFYNNHFMVIHDLLRELAIHQSNQEPIEERKRLIIETNENKSEWGLCEKQQGMMTRILSFCFRYCAKQKYQQIPAHTLSISIDETCNSYWSHMQP…
HK_NBARC_NBARC.Chr17.5	Chr17	TGFam.ISGAP	19497004	19500927	ATGGAAGAGACTAAACAGCGTGTTGCTCTTCAAGAGAGATTGAGGATGGTGTCTTCTGAAATTGTTGAAAAAGGTCAAAGCAGTGAAAGCAACAAGCAAATTCTGAGGTCAACCCTTAAGGATAACGCTGCTGTGGTGCAAGAGATCAAGCAATACAACGAGCACTTGAATCCACCCAGAGAAGAAATCAACACCCTTTTTGGAGAAAAAGAAAATGCAGATGAAGAATTTGTTTGTAAATGGTTCTCCAAGTGGTGTCTATCTTTGTTTCTGTGCAGATTTGGGCAGAAGAGGGATGATTCATTTGCTGGTGGTGCTGAGAAGCAAGGTCTTGTGGCAAAAGATATTGAAGAGAAACTTTACAAAATGAGAGAAATTCTTGAGCTTCTGAGCAAAAGG…	MEETKQRVALQERLRMVSSEIVEKGQSSESNKQILRSTLKDNAAVVQEIKQYNEHLNPPREEINTLFGEKENADEEFVCKWFSKWCLSLFLCRFGQKRDDSFAGGAEKQGLVAKDIEEKLYKMREILELLSKRSFEKNLGGFGTPLKFPFGVPENPKFTVGLDEPLSKLKIEVLRDGVSVVLLTGLGGMGKTTLATKLCWDEQVKGKFGENILFVTFSKTPQLKIIVERLFEHCGCQVPDFQSDEDAANQLGLLLRQIGRSSMLLVVDDVWPGSEALVQKFKVQIPDYKILVTSRVAFPSFGTQCILKPLVHEDAVTLFRHCALLEESNSSIPDEELVQKVVRICKGLPLAIKVIGRSLSHQPSELWLRMVEELSQHSILDSNTELLTCLQKILNVLED…
HK_NBARC_NBARC.Chr17.6	Chr17	TGFam.ISGAP	19676507	19682227	ATGGCTATGATTATGGATGCTGTTCTTGGAAAACTGCTTGATGAGCTGCTGAAAGAAGTTGTGAATGTGAAAGACAGGGCTGTGAAGTTCAGAGCCACCCTGATAACCTTAGAGTCAACCCTAAATAAAGTAGGAAGGTTGGCTAAACAGATTGATGGTCTTAACAATCAATTGAACAAACCAGCCGAGGAAATGAAAGAGCTGAAAGATAAGTTGGCGAAAGGGAAGAAACTCGTTATGGAGTGCTCCGAAATCCAGTGGTGGAATTGCTGCTATAAGGCCAACTACCAAGAGGAACTCGAGGCGTTGTACGAGTCGATCCGTTTGTACTTCAATCTGGATATGCAAGGTCTGATACTAACTAATGAGTTACAAAACCAGGTGATTCTGACCGAGATT…	MAMIMDAVLGKLLDELLKEVVNVKDRAVKFRATLITLESTLNKVGRLAKQIDGLNNQLNKPAEEMKELKDKLAKGKKLVMECSEIQWWNCCYKANYQEELEALYESIRLYFNLDMQGLILTNELQNQVILTEIHATVMESGPRRTELKGVCSPPAPPAFTVGLDVHLREMKVKLLNNHHHAGSVLTVTGTPGSGKSTLVKKFCCDEEVKGIFKENIFFITFAQKPKLNTIVQRLFQHNACQVPEFQSDDDAVYQLENLLKQIGKNPILLVLDDVPSESVSLVDKFVFQIPKYKILVTSRITIRGFDQPYVLKSLNEVDAINLFRHSASLNQSSSDIPENIVKKIARGCSGSPLALIVTGKSLSREPPWAWNNRAKKLSKGQPILAFSADVLTCLQKSFD…
HK_NBARC_NBARC.Chr17.7	Chr17	TGFam.ISGAP	38397879	38401237	ATGGCCCTGAACGATTTTTTCGCTGGGGAGATCGCGACGGAGCTTCTGAAAATGCTGATAAACATCTCCCGGAAGTCCCTACTCTGCCGCGGCAGCGCCGACCAGCTCATCAGCTACATCCAGGACCTCCTCCCCACCATCGAGGAAATCAAGTACTCCGGCGTCGAGCTTCCTGCGCAGCGCCAGTCGCAACTCGACCGTCTCTCGGAGATTCTCCGCTCCGGCGTCGAGCTCTCCCACAAGGTCCTCGCCTCCAGCCGCTGGAACGTCTACCGCAACCTCCACCTCGCAAAAAAAATGGACAAGCTCGAGAAGAACGTGTCCAAGTTCTTGGTGGGTCCCATGCAGGCGCATATCATGGCGGACATACATCACACGCGGTTCCAGATGGAGGAGCGG…	MALNDFFAGEIATELLKMLINISRKSLLCRGSADQLISYIQDLLPTIEEIKYSGVELPAQRQSQLDRLSEILRSGVELSHKVLASSRWNVYRNLHLAKKMDKLEKNVSKFLVGPMQAHIMADIHHTRFQMEERFDRVDNSVRRLEKYFGNMKIGVGGGGWVEEAVRSVDEDVVDSSSAVGLGFGKNKVREMVIGREDLWVVGISGIGGSGKTTLARELCKDNQVRCYFKDRILFLTVSQSPNVEKLRTKIWGYIMGNERLDANYVVPQWQWMPQFECRSEARTLIVLDDVWTLSVVDQLVCRIPGCKFLVVSRSKFQTVLSYEVELLSEEDALSLFCHHAFGQRSIPLAANENLVKQVVTECGRLPLALKVIGASLRDQTEMFWMSVKNRLSQGQSIGE…
HK_NBARC_NBARC.Chr17.8	Chr17	TGFam.ISGAP	38404312	38408006	ATGGCGCTAACGGAGTTCTTCCACGGCGAGATCTCGTCGGAGCTATGGAAAATGCTGGTTTCAATTTCCCGAAAAGCCCTCCGCTGCAAGTCGAGCGCCGAGAGCCTCATCACCTACGTCCGCGAGCTCCTTCCGACGATCGAAGAGATCAAATATTCCGGCGTGGAGCTGCCGGCGCCGCGCCAGTCTCAGCTCGACCGCCTCTCGGAGATCCTCCGCTCCGGCGTCGAGCTCTCGCACCAGGCCCTCTCCTCCTCCCGCTGGAACGTGTACCGCAACTTCCAGCTCGCCAAAAAAATGGAGAAGCTCGAGAAGCACGTGACAAGGTTCTTGCAGGTTCCCATGCAGGCACATATATTGGCGGACGTGAACCACGTGCGGTTCGAGATGGCGGAGCGG…	MALTEFFHGEISSELWKMLVSISRKALRCKSSAESLITYVRELLPTIEEIKYSGVELPAPRQSQLDRLSEILRSGVELSHQALSSSRWNVYRNFQLAKKMEKLEKHVTRFLQVPMQAHILADVNHVRFEMAERFDRVEASNRRMERLIGEMKIGVNGGGWVEEAVRSMQEDETWVEGCNGNNNNGFGVGLEFGKNKVLEMIFTRSGDVSVVGICGIGGSGKTTLAREVCRDDQVRCYFKERILFLTVSQSPNVEQLRESIWVHIMGNQGLNGNYAVPQWMPQFECKVETQVLVVLDDVWSLSVLDKLVLKIPGCKFLVVSRFNFPTIFNATYHVELLGEHDALSLFCHHAFGQKSIPMGANVSLVKQVVAECGRLPLALKVIGASLRDQNEMFWLSVKS…
HK_NBARC_NBARC.Chr18.1	Chr18	TGFam.ISGAP	7405699	7429409	ATGGCTGAAACTGCAGTGGCCTTTCTACTTGACCATTTGGTTAAGTTACTGAGTGAGGAAGCAACAATCTTAGGAAAGGTGCACAAGGAGGTTGAGGAGATCAAGAATCAGCTAGAACGAATAAACTCTTACATTAGGGATGCAGAAAAGAAGCAGTTGTCAGATGATCAATCAAGTGTCAAAAGTTGGTTGAAATCATTGAGGAACGTGGCGTTTGAGATGGAGGATGTGATTGATCACTATTTGCTCAAAGTGGAAGAACGTGGTCAGAGGCATGGTATCCATGGTGCAGCCACTGAATTAATAGAGAAGGTCAAAACTGTAACACATCGTCATGATATTGCATCTGATATTAAAAAAGTCAGAAAAACCCTAGACGGTCTCTACAGTGAAGGAATG…	MAETAVAFLLDHLVKLLSEEATILGKVHKEVEEIKNQLERINSYIRDAEKKQLSDDQSSVKSWLKSLRNVAFEMEDVIDHYLLKVEERGQRHGIHGAATELIEKVKTVTHRHDIASDIKKVRKTLDGLYSEGMVLKLEPSSRAPYRATPRLGAHFVKEPQLVGIDRHKQQLTNWLTERGVPIRVVVGPPGIGKTAIVKNVYSKQEQVSLQKNGTSYFEFCAWITMSRSQVDDEQNMLIRQIIENILEKDPGAATLRSETTTLESRIRKLKEYFEDKRYLIVFDDMQDLNFWNVIQYALNQNSSTSSKVIITTRDESVANMIGSDHFVSVYRVEPLSLSDALMLFRHKAFQFEKVEYPELNGLSEEFVEKCNRVPLAILAIASHLATKEKTTTEWRKALI…
HK_NBARC_NBARC.Chr18.2	Chr18	TGFam.ISGAP	7960105	7962864	ATGGCAGAAACTGCAGTGTCCTTGGCTGGTCAGCATGCGCTTCCAAAAATATTGGAAGCTGTCAAAATGCTGAGAGATCTCCCAAACGAAGTTAGAGACATTACAGATGAACTTGAAAGCTTTCAAGATTTCATCAATGATGCTGATAAAGTGGCTGAAGCTGAAGAAGATGATAGAAGGCGTCATAGAATAAAAGAAAGGGTGATGCGGCTGAGAGAAGCAGCTTTTCGCATGGAAGATGTCATCGATGAATATAACATCTCCGGTGAGGATGAGCAACCTGATGATCCTCGATGTGCAGCTTTACTATGTGAGGCTGTTGCCTTCATCAAAACTCAAATCCTTCGCCTTCAAAGTGCATATAAGATTCAGGATGTTAAATCGCTTGTTCGTGCTGAA…	MAETAVSLAGQHALPKILEAVKMLRDLPNEVRDITDELESFQDFINDADKVAEAEEDDRRRHRIKERVMRLREAAFRMEDVIDEYNISGEDEQPDDPRCAALLCEAVAFIKTQILRLQSAYKIQDVKSLVRAERDGFQRHFPLEQRPTSSRGNQDVTWKNLRRVPLFIEEDEVVGLDNDRATLKNWLTKGREKRTVISVVGIAGVGKTTLAKQVYDQVRNNFECHALITVSQSYSAEGLLRRLLDELCKLKKEDPPKDVSNMESLIEEVRNRLRNKRYVVLFDDVWNETFWDHIESAVIDNKNGSRILITTRDEKVAGYCRKSSFVEVHKLEKPLTEEESLKLFCKKAFQNSSNGDCPEELKDISLQIVRKCKGLPLAIVVIGGLLSQKDENAPEWGQF…
HK_NBARC_NBARC.Chr18.3	Chr18	TGFam.ISGAP	7982517	7984673	ATGGCAGAAACTGCAGTGTCCTTGGCTGGTCAGCATGCGCTTCCAAAAATATTGGAAGCCGTCAAAATGTTGAGAGATCTCCCAAAAGAAGTTAGAGACATTACAGATGAACTTGAAAGCTTTCAAGATTTCATCAATGATGCTGATAAAGTGGCTGAAGCCGAAGAAGATGATGGAAGGCGTCATAGAATAAAAGAAAGGGTGATGCGGCTGAGAGAAACAGCTTTTCACATGGAAGATGCCATCGATGAATATCACATCTCCTGTGAGGATAAGCAACCTGATGATCCTCGATGTGCAGCTTTACTATGTGAGGCTGTTGCCTTCACCAAAACTCAAATCCTTCTCCTTCAAAGTGCGTATAAGATTCAGGATGTTAAATCCCTTGTTCGTGCTGAA…	MAETAVSLAGQHALPKILEAVKMLRDLPKEVRDITDELESFQDFINDADKVAEAEEDDGRRHRIKERVMRLRETAFHMEDAIDEYHISCEDKQPDDPRCAALLCEAVAFTKTQILLLQSAYKIQDVKSLVRAERDGFQSHFPLEQRPTSSRGNQDVTWQKLRMDPLFIEEDDVVGLDGPRDTLKNWLTKGRKKRTVIFVVGIPGVGKTTLAKQVYDQVRNNFECHALITVSQSYSVEGLLRHMLNEICKEKKEDPPKDVSTIESLTEEVRNCLRNKRYVVLFDDVWNGKFWDHIESAVIDNKNGSRVLITTRDEKVAAYCRKSSFVKVHKLEKPLTEEESLKLFCKKAFQYSSDGDCPEELEDISLEIVRKCKGLPLAIVSIGGLLSQKDESAPEWGQF…
HK_NBARC_NBARC.Chr18.4	Chr18	TGFam.ISGAP	8002927	8005686	ATGGCAGAAACTGCAGTGTCCTTGGCTGGTCAGCATGCGCTTCCAAAAATATTGGAAGCTATCAAAATGGTGAGAGATCTCCCAAAAGAAGTTAGAGACATTACAGATGAACTTGAAAGCTTTCAAGATTTCATTAATGATGCTGATAAAGTGGCTGAAGCTGAACAAGATGATGGAAGGCGTCATAGAATAAAAGAAAGGGTGATGCGGCTGAGAGAAGCAGCTTTTTGCATGGAAGATGTCATCGATGAATATAACATCTCCTGTGAGGATAAGCAACCTGGTGATCCTCGATGTGCAGCTTTACTATGTGAGGCTGTTGCCTTCATCAAAACTCAAATCCTTCTCCTTCAAAGTGCGTATAAGATTCAGGATGTTAAATCCCTTGTTCGTGCTGAA…	MAETAVSLAGQHALPKILEAIKMVRDLPKEVRDITDELESFQDFINDADKVAEAEQDDGRRHRIKERVMRLREAAFCMEDVIDEYNISCEDKQPGDPRCAALLCEAVAFIKTQILLLQSAYKIQDVKSLVRAERDGFQTHFPLEPRLTSSRGNQDVTWQKLRMDPLFIDEDDVVGLDGPRDTLKNWLTKGREKRTVISVVGIPGVGKTTLAKQVYDQVRNNFECHALITVSQSYSAEGLLRRLLDELCKVKKEDPPKDVSNMESLTEEVRNRLRNKRYVVLFDDVWNETFWDHIESAVIDNKNGSRILITTRDEKVAGYCKKSSFVEVLKLEEPLTEQESLKLFSKKAFQYSSDGDCPEELKDISLHIVRKCKGLPLAIVAVGGLLSQKDESAPEWGQF…
HK_NBARC_NBARC.Chr18.5	Chr18	TGFam.PM	8049894	8052668	ATGTGTAACTGGGACTACTTAGTGTCCTTCGCTCGTGCGGTGTATCCAATAATTGTGGATGTATTCAATCAGGTCAGGGGTGTAAAAAAGGAGTCTGCAGACATTGAAGCTGATCTGGAAAGCTTTAAAGCTTTCATCCATGGTGCTGATAAAGAAGCTGAAGATGAACAAGATGCTGATAGGCGTGAAGGAATAAAAAAAATGGTGAAACAGCTGAGAGAAGCAGCTTTTTGCATGGAAGATGTCATCGATGAATATGAGATCTCCTGTGAGGAAAAGCAACCTGGTGATCCTGGATGTGCAGTTTTACCCTGTGATGCTGTTGGCTTCACGAAAACTCTGATCCCTCGTATTCTATTAGCGTATAAGATTCACGATGTGAAATCACTTGTCTGTGGA…	MCNWDYLVSFARAVYPIIVDVFNQVRGVKKESADIEADLESFKAFIHGADKEAEDEQDADRREGIKKMVKQLREAAFCMEDVIDEYEISCEEKQPGDPGCAVLPCDAVGFTKTLIPRILLAYKIHDVKSLVCGIKERYGLCSQFSLEQRPYSSRGNQNAAWQNIRLAALHTHEADTEGLEGPRKILKDWLVDGLKELTVITVEGMGGLGKTTLSKQVFDNPDVRKLFDCHAWITVSQSYTVVELLRKLLCKFYEDKKNSPPQNVSTMDRESLIDEVRNYLNGKRYVVVFDDVWNKEFWYDIKLALFDNKEKSRILITTRDKDVAVCCKESCFVHVHKMNPLTEVESLKLFYKKAFQRDFNGCCPEGLENTSLEIVKKCQGFPLAIVVIGGLLANKPKDK…
HK_NBARC_NBARC.Chr18.6	Chr18	TGFam.ISGAP	8105906	8108062	ATGGCAGAAACTGCAGTGTCCTTGGCTGGTCAGCATGCGCTTCCAAAAATATTGGAAGCTGTCAAAATGTTGAGAGATCTCCCAAAAGAAGTTAGAGACATTACAGATGAACTTGAAAGCTTTCAAGATTTCATCAATGATGCTGATAAAGTGGCTGAAGCTGAACAAGATGATGGAAGGCGTCATAGAAAAAAAGAAAGGGTGATGCGGCTGAGAGAAGCAGCTTTTCGCATGGAAGATGTCATCGATGAATATAACATCTCCTGTGAGGATAAGCAACCTGATGATCGTCGATGTGCAGCTTTACTATGTAAGGCTGTTGCCTTCATCAAAACTCAAATCCTTCTCCTTCAAAGTGCGTATAAGATTCAGGATGTTAAATCGCTTATTCGTGCTGAA…	MAETAVSLAGQHALPKILEAVKMLRDLPKEVRDITDELESFQDFINDADKVAEAEQDDGRRHRKKERVMRLREAAFRMEDVIDEYNISCEDKQPDDRRCAALLCKAVAFIKTQILLLQSAYKIQDVKSLIRAERDGFQSHFPLEQRPTSSRGNQDVTWQKLRRDPLFIEEDEVVGLDGPRGILKNWLTNGREKRTVISVVGIAGVGKTTLAKQVYDQVRNNFECHALITVSQSFSSEGLLRHMLNELCKEKKEDPPKDVSTIESLTEEVRNRLRNKRYVVLFDDVWNGKFWDHIESAVIDNKNGSRILITTRDEMVAEYCRKSSFVEVHKLEKPLTEEESLKLFCKKAFQYSSDGDCPEELKDISLEIVRKCKGLPLAIVAIGGLLSQKDESAPEWGQF…
HK_NBARC_NBARC.Chr18.7	Chr18	TGFam.AUG	8116152	8119328	ATGGAGGCTAGGAAGCGGGTCTTGCATGTGTTGTGGCGGCACAAGGAAAAGCACCATAAGGAACAAGAATGCAATGGTACAACAATGAATTTACCTATTATATCAGTACACAACATGAATGATCACAATTGTTTCGGTTCTATGACAAGTGTTGGATGGATGATTACAACATGGAAAAAAATACAACGAAATTTTGACAACATGGAGTTCCATAACAACTTCGAGTGTCATGCATGGATCACAGTGTCTCAATCCTACAAGTTATGCAAAGAAAAATTGGAGACACCTCTTCATAATGATTCATTGATAGATGAAGTGAGAAACCACTTGTGCTACAAGAGGTATGTTGTCCTGTTTCATGACGTATGGGATAAAAAGTTTTCGGATGGCATTGATTTT…	MEARKRVLHVLWRHKEKHHKEQECNGTTMNLPIISVHNMNDHNCFGSMTSVGWMITTWKKIQRNFDNMEFHNNFECHAWITVSQSYKLCKEKLETPLHNDSLIDEVRNHLCYKRYVVLFHDVWDKKFSDGIDFALIDKNSDTEVSITTSDTEVAEFCQKTSFIQIESLPKSIGKLQNLETLDVRQTKVFEIPKEISKLLKLRLLLANEISSIAMRALLVHQGLEDALNGETNLVVKMEGKDKKILLDKAYSAIILSLGDKVLRQVSKEKTAVGIW*
HK_NBARC_NBARC.Chr18.8	Chr18	TGFam.ISGAP	8178037	8180799	ATGGCAGAAACTGCAGTGTCCTTGGCTGGTCAGCATGCGCTTCCAAAAATATTGGAAGCTTTCAAAATTTTGAGAGATCTCCCAAAAGAAGTTAGAGACATTACAGATGAACTTGAAAGCTTTCAAGATTTCATCAATGATGCTGATAAAGTGGCTGAAGCCGAAGAAGATGATGGAAGGCGTCATAGAATAAAAGAAAGGGTGATGCGGCTGAGAGAAGCAGCTTTTCGCATGGAAGATGTCATCGATGAATATAACATCTCCTGTGAGGATAAGCAACCTGATGATCCTCGATGTGCAGCTTTACTATGTGAGGCTGTTGCCTTCATCAAAACTCAAATCCTTCTCCTTCAAAGTGCGTATAAGATTCAGGATGTTAAATCCCTTGTTCGTGCTGAA…	MAETAVSLAGQHALPKILEAFKILRDLPKEVRDITDELESFQDFINDADKVAEAEEDDGRRHRIKERVMRLREAAFRMEDVIDEYNISCEDKQPDDPRCAALLCEAVAFIKTQILLLQSAYKIQDVKSLVRAERDGFQTHFPLEQRQTSSRGNQDITWQKLRRDPLFIEEDEVVGLDGPRGILENWLTKGRKIRTVISVVGIAGVGKTTLAKQVYDQVRNKFDCNALITVSQSFSSEGLLRHMLNELCKENKEDPPKDVSTIESLTEEVRNRLRNKRYVVLFDDVWNGKFWDHIESAVIDNKNGSRILITTRDEKVAEYCRKSSFVEVFKLEKPLTEEESLKLFYKKAFQYSSDGDCPEELKEISLEIVRKCKGLPLAIVAIGGLLSQKDESAPEWGQF…
HK_NBARC_NBARC.Chr18.9	Chr18	TGFam.PM	8210245	8211726	ATGGCAGAAACTGCAGTGTCCTTGGCTAGTGAGCATGCGCTTCCAAAAATAATGGAAGGTATCAAAATGGTGAGAGATCTCCCAAAAGAAGTTAGAGACATTACAAATGTCATCGATGAATATAACCTCTCCTGTGAGGATAAGCAACCTGGTGATCCTCGATGTGCAGCTTTACTATGTGAGGTTGTTGCCTTCATCAAAACTCAAATCCTTCTCCTTCAAAATGCGTATAAGATTCAGGATGTTAAATCGCTTGTTTGTGTTGAAAGAGATGGTTTCCAAACCCATTTTCCTTTAGAACCAAGACTAACAAGTTCTAGAGGAAATCAAAATGTCACCTGGCAGAAACTTCGAATGGATCCTCTCTTTATTGAGGAAGACAATGTTGTGGGGCTTGAT…	MAETAVSLASEHALPKIMEGIKMVRDLPKEVRDITNVIDEYNLSCEDKQPGDPRCAALLCEVVAFIKTQILLLQNAYKIQDVKSLVCVERDGFQTHFPLEPRLTSSRGNQNVTWQKLRMDPLFIEEDNVVGLDGLRGTLKNWLTKGREKRTVISVVGIPGVGKTTLAKQVFDQVRNNFECHALITVSQSYSAEGLLRRLLDELCKVKKEDPPKGVSNMESLTEEVRNRLRNKRYVVLFDEVWNETFWDHIEYAVIDNKNGSRILITTRDVKVAGYCWKSSFVEVLKLEEPLSEEESLKFFSKKAFQYSSDGDCPEELKDMSLEIVRKCKGLPLAIVAIGGLLSKKDESSPEWKQFSENLCLDQLERNSELNSITKILGLSYDDLPINLRSCLLYFGMYP…
HK_NBARC_NBARC.Chr18.10	Chr18	TGFam.AUG	8218477	8220991	ATGAGGTCCTTTAATGGTGGTTTTCCACCATGGAGATGCAGCGGAAGACAAAGGAGAAGAGGGGAGAGGAGGCGCCATCCACTAGGGAATAAGCCATGGAAGAAGGAGCTTCACCACCAAGATGAGCCTTGGATAAGAAGCTTGGAAGGATGCTTCAATGGAGGAAAAGAAAGAGGGAGAGAAAGAGAGAGGGGGGAGCACGAAATTGAAGGAATAAAGGAGGCAGAGAAGGCCTTTCCTTGGATCTCTAGCCCAATCTACTTGGAGTCTTCTAACCAATGCCCTTGCGGGGTAGGATTGCATCATAAAGGTTTACCTCTAGCAATAGTGGCCATTGGTGGTCTTTTGTCTCAAAAAGATGAAAGTGCACCTGAATGGGGACAGTTTAGTAGAGATCTA…	MRSFNGGFPPWRCSGRQRRRGERRRHPLGNKPWKKELHHQDEPWIRSLEGCFNGGKERGRERERGEHEIEGIKEAEKAFPWISSPIYLESSNQCPCGVGLHHKGLPLAIVAIGGLLSQKDESAPEWGQFSRDLSLDLERNSELNSITKILGLSYDDLPISLRSCLLYFRMYPEDYEVESDRLIRQWIAEGFVKHETGKTLEEVGQQYLSGLVHRSLVQVSSFGLDGNVERCRVHDLIHDMILRKVKDTGFRQYIDGPDQSVSSKIVRRLTIATDDFSGSIGSSPIRSILIMTGKDENLSQDLVNKFPTNYMLLKVLDFEGSAFSYVPENLGNLCHLKYLSFRYTWIASLPKSIGKLQNLETLDIRGTGVSEMPEEISKLKKLRHLLAYSRCSIQWKDIG…
HK_NBARC_NBARC.Chr18.11	Chr18	TGFam.ISGAP	8225449	8226624	ATGGCAGAAACTGCAGTGTCCTTGGCTGGTCAGCATGCGCTTCCAAAAATATTGGAAGCTGTCAAAATGCTGAGAGATCTCCCAAAAGAAGTTAGAGACATTACAGATGAACTTGAAAGCTTTCAAGATTTCATCAATGATGCTGATAAAGTGGCTGAAGCTGAACAAGATGATGGAAGGCGTCATAGAATAAAAGAAAGGGTGATGCGGCTGAGAGAAGCAGCTTTTCGCATGGAAGATGTCATCGATGAATATAACATCTCCTGTGACGATAATGCGTATAAGATTCAGGATGTTAAATCCCTTGTTCGTGCTGAAAGACATGGTTTCCAAACCCATTTTCCTTTAGAGCAAAGACAAACCAGTTCTAGAGGAAATCAAGATATCACATGGCAGAAA…	MAETAVSLAGQHALPKILEAVKMLRDLPKEVRDITDELESFQDFINDADKVAEAEQDDGRRHRIKERVMRLREAAFRMEDVIDEYNISCDDNAYKIQDVKSLVRAERHGFQTHFPLEQRQTSSRGNQDITWQKIRRDPLFIEEDEVVGLDGPRGILKNWLTKGREKRTVISVVGIAGVGKTTLAKQVYDQVRNDFECHALITVSQCFSAEGLLRHMLNELCKEKMEDPPKDVSTIESLTEEVRNRLRNKRYVVLFDDVWNGKFWDQIESAVIDNKNGSRILITTRDEKVAEYCRKSSFVEVHKLEKPLTEEESLKLFCKAFQYSSHGDCPEALKDISLQIVRKCKVMEACLWSFYGGWIFELQ*
HK_NBARC_NBARC.Chr18.12	Chr18	TGFam.ISGAP	8231536	8234298	ATGGCAGAAACTGCAGTGTCCTTGGCTGGTCAGCATGCGCTTCCAAAAATATTGGAAGCTGTCAAAATGCTGAGAGGTCTCCCAAAAGAAGTTATAGACATTACAGATGAACTTGAAAGCTTTCAAGATTTCATCAATGATGCTGATAAAGTGGCTGAAGCTGAACAAGATGATGGAAAGCGTCATAAAATAAAAGAAAGGGTGATGCGGCTGAGAGAAGCAGCTTTTCGCATGGAAGATATCATCGATGAATATAACATCTCCTGTAAGGATAAGCAACCTGATGATCCTCGATGTGCAGCTTTACTATGTGAGGCTGTTGCCTTCATCAAAACTCAAATCCTTCGCCTTCAAAGTGCGTATAAGATTCAGGATGTTAAATTGCTTGTTCGTGCTGAA…	MAETAVSLAGQHALPKILEAVKMLRGLPKEVIDITDELESFQDFINDADKVAEAEQDDGKRHKIKERVMRLREAAFRMEDIIDEYNISCKDKQPDDPRCAALLCEAVAFIKTQILRLQSAYKIQDVKLLVRAERDGFQRHFPLEKRSTSSRGNQDATWQKLRMDPLFIEEDEVVGLDNDRATLKYWLTNGREQRTVISVVGIAGVGKTTLAKQVYDQVRNNFECHALITVSQSFSAVGLLTHMLNELCKEKNEDPPKDVSTIESLTKEVRNRLRNKRYVVLFDDVWNETFWDHIESAVIDNKNGSRILITTRDEKVAEYCRKSSFVEVHNLEKPLTEEESLKLFCKKAFQYSSDGDCPEELKDISLEIVRKCKDLPLAIVAIGGLLSQKDESAPEWGQF…
HK_NBARC_NBARC.Chr18.13	Chr18	TGFam.ISGAP	8238488	8239678	ATGGCAGAAACTGCAGTGTCCTTGGCTGGTCAGCATGCGCTTCCAAAAATATTGGAAGCTGTCAAAATGCTGAGAGATCTCCCAAACGAAGTTAGAGACATTACAGATGAACTTGAAAGCTTTCAAGATTTCATCAATGATGCTGATAAAGTGGCTGAAGCTGAAGAAGATGATGGAAGGCGTCATAGAATAAAAGAAAGGGTGATGCGACTGAGAGAAGCAGCTTTTCGCATGGAAGATGTCATCGATGAATATAACATCTCCTGTGAGGATAAGCAACCTGATGATCCTCGATGTGCAGCTTTACAATGTGAGGCTGTTGACTTCATCAAAACTCAAATCCTTCGCCTTCAAAGTGCATATAAGATTCACGATGTTAAATCGCTTGTTCGTGCTGAA…	MAETAVSLAGQHALPKILEAVKMLRDLPNEVRDITDELESFQDFINDADKVAEAEEDDGRRHRIKERVMRLREAAFRMEDVIDEYNISCEDKQPDDPRCAALQCEAVDFIKTQILRLQSAYKIHDVKSLVRAERDGFQRHFPLEQRPTSSRGNQDVTWQTLRRAPLFIEEDEVVGLHNDRATLKYWLTKGREKRTVISVVGIAGVGKTTLAKQVYDQVRNNFECHALIAVSQSYSAEGLLRRLLDELPKVKKEDPSKDVSNMESLIEEVRNRLRNKRYVVLFDDVWNETFWDHIESAVIDNKNGSRILITTRDEKVAEYCRKSSFVEVHNLEKPLTEEESLKLFCKKAFQYSSDGDCPEELKDISLEIVRKCKDLPLEIKNLNEKSRETLTRQIKM*
HK_NBARC_NBARC.Chr18.14	Chr18	TGFam.AUG	8242855	8253809	ATGAATATGGTAGAACAATCTAGAACTATAAATAAAGACTGGAGAAAAGAAGGTATAGTCAGCCAAGTTAAAGATCAAGGCAACTGCGGATCTTGCTGGACATTCAGCACAACTGGTGCATTGGAGGCAGCTTACACACAGGCCTTTGGGAAGAATATCAGTCTTTCTGAGCAGCAGCTAGTGGATTGTGCCGGTGCTTTCAATAACTTTGGCTGTAATGGTGGCTTGCCATCCCGGCTTGACACAGAGGAAGCATATCCCTACACCGGAAAAGATGGTGTCTGCAAATTTACAGCTAAAAACATTGCTGTTCAAGTCATTGACTCTATCAATATCACTTTGGGTGCTGAGGATGAATTGAAACAAGTGGTTGCTTTTGTTTGGCCAGTTAGTGTGGCA…	MNMVEQSRTINKDWRKEGIVSQVKDQGNCGSCWTFSTTGALEAAYTQAFGKNISLSEQQLVDCAGAFNNFGCNGGLPSRLDTEEAYPYTGKDGVCKFTAKNIAVQVIDSINITLGAEDELKQVVAFVWPVSVAFEVVKDFRFYNNGVYTSTICGSTPMNERVAGGIGPGEPGAKEGIMNGVVMVKVEEDVEGIGIVSLLKNDYTFIQELFARLKSPTTSQESKKNLVSRGEFARFVADKKSLKSLKMEDCSNLGGFVLCSSSLFTLWLSDLYSLDDIKFSLVDNKNGSRILITTRNEEVAEFCKKSSLIEVHKLEPLGLLCKKPYWYCVRATSSFRGTSTSKYEDVGLEIVRKCQCLPLAIVVIGGLLYRKSAPEWKQFSQNLKLRNGGEEF*
HK_NBARC_NBARC.Chr18.15	Chr18	TGFam.PM	8274405	8281207	ATGCGTAACAATTTCGAGTGCCATGCATTGATCACAGTGTCTCAATCCTACTCTGCAAAAGGATTGCTGAGACGTATGTCGGATGAGCTTTGCAAAGAAAAAAAGGAGGACCCTCCCAAGGATGTTTCTACCATCAAGTCATTGACAAAAGAAGTCAGAAACCGCTTGTGCAATAAGAGGTATGTTGTCTTGTTTCATGACATAGGGAATGAAAAATTTTGGGATCACATTGAATCTGCTGTAGTTGATGATAAAAATGGAAGTAGGATACTAATCACAACCAGGGATGAAAAGGTTGCAGAATTTTGTATGAAATCTTCATTCGTGGAGGCATTTCAGTATAGTTCCTATGGAGATTGTCCAGAAGAATTGGAAGATATGTCTCTTGACATTGTTAGA…	MRNNFECHALITVSQSYSAKGLLRRMSDELCKEKKEDPPKDVSTIKSLTKEVRNRLCNKRYVVLFHDIGNEKFWDHIESAVVDDKNGSRILITTRDEKVAEFCMKSSFVEAFQYSSYGDCPEELEDMSLDIVRKCKGLPLAIVAIGGLLSQKDESAPEWKQFSENLSLDQLERNSELNMSITKILGLSYEDLPSNVRSCLLYFGMYPEDYEVRSDRLIGHWIAEGFVKHETGKTLEEVAQQYLSGLVGRSLVQVSSLRIDGKVKRCHVHDLIHDMILKKIQDTGFCQYIGRHDQSMSSTGLSYVPQNLGNSCHLKYLSFRNTGIEILPKSIGKLQNLEISRLKMLRHLLADSTCSIQWKDIGGMTSLHEIPTVTIDDDGVVFREVEKLKQLRNLMVVNF…
HK_NBARC_NBARC.Chr18.16	Chr18	TGFam.ISGAP	8292756	8295461	ATGCTGAGAGATATCCCAAAAGAAGTTAGAGACATTACAGATGAACTTGAAAGCTTTCAAGATTTCATCAATGATGCTGATAAAGTGACTGAAGCTGAAGAAGATGATGGAAGGCGTCATAGAATAAAAGAAAGGGTGATGCAGCTGAGAGAAGCAGCTTTTCGCATGGAAGATGTCATCGATGAATATAACATCTCCTGTGAGGATAAGCAGCCTGATGATCCTCGATGTGCAACTTTACTATGTGAGGCTGTTGACTTCATCAAAACTCAAATCCTTCGCCTTCAAAGTGCATATAAGATTCAGGATGTTAAATCCCTTGTTCGTGCTGAAAGAGATGGTTTCCAAAGCCATTTTCCTTTAGAGCAAAGACAAACCAATTCTAGAGGAAATCAAGAT…	MLRDIPKEVRDITDELESFQDFINDADKVTEAEEDDGRRHRIKERVMQLREAAFRMEDVIDEYNISCEDKQPDDPRCATLLCEAVDFIKTQILRLQSAYKIQDVKSLVRAERDGFQSHFPLEQRQTNSRGNQDITWQKLRRDPLFIEEDEVVGLDGPRGILKNWLTKGREKRTVISVVGIAGVGKTTLAKQVFDQVRNNFDCHALITVSQSFSAEGLLRHMLNELCKEKKEDPPKDVSTIESLTEEVRNRLRNKRYVVLFDDVWNGKFWDHIESAVIDNKNGSRILITTRDEKVAEYCRKSSFVEVLKLEEPLTEKESLKLFCKKAFQYSSDGDCPEELKDISLEIVRKCKGLPLAIVAIGGLLSQKDESAPEWEQFSGDLSLDLERNSELNSITKILG…
HK_NBARC_NBARC.Chr18.17	Chr18	TGFam.ISGAP	8526788	8529556	ATGGCAGAAACTGCAGTGTCCTTGGCTGGTCAGCATGCGCTTCCAAAAATATTGGAAGCTGTCAAAATGCTGAGAGATCTCCCAAAAGAAGTTAGAGACATTACAGATGAACTTGAAAGCTTTCAAGAGTTCATCAATGATGCTGATAAAGTGGCTGAAGCTGAACAAGATGATGGAAGGCGTCATAGAATAAAAGAAAGGGTGATGCGGCTGAGAGAAGCAGCTTTTCGCATGGAAGATGTCATCGATGAATATAACATCTCCTGTGAGGATAAGCAACCTGATGATCCTCGATGTGCAGCTTTACTATGTGAGGCTGTTGCCTTCATCAAAACTCAAATCCTTCTCCTTCAAAGTGCGTATAAGATTCAGGATGTTAAATCCCTTGTTCGTGCTGAA…	MAETAVSLAGQHALPKILEAVKMLRDLPKEVRDITDELESFQEFINDADKVAEAEQDDGRRHRIKERVMRLREAAFRMEDVIDEYNISCEDKQPDDPRCAALLCEAVAFIKTQILLLQSAYKIQDVKSLVRAERDGFQSHFPLEQRPTSSRGNQDITWQKLRRDPLFIEEDEVVGLDGPRGILKNWLTKGREKRTVISVVGIAGVGKTTLAKQVYDQVRNNFECHALITVSQSFSAEGLLRHMLNELCKEKKEDPPKDVSTIELLTEEVRNRLRNKRYVVLFDDVWNGKFWDHIESAVIDNKNGSRILITTRDEKVAEYCRKSSFVEVLKLEEPLTEKESLKLFCKKAFQYSSDGDCPEELKDISLQIVRKCKGLPLAIVAIGGLLSQKDESAPEWGQF…
HK_NBARC_NBARC.Chr18.18	Chr18	TGFam.PM	8548127	8553352	ATGGAGGCTAGGAAGCAGGTCCCACATGTGTTGTGGCAGCACAAGGACTTCCATAACAACTTCGAGTGTCATGCATGGATCACAGTGTCTCAATCCTACACTGTAGAAGAATTGCTGAAGGATATGTTACACAAGCTATGCAAAGAAAAATTGGAGACACCTCTTCATAATGATTCATTGATATATGAAATGAGAAATCACTTGTGCCACAAGAGGTATGTCATCCTGTTTCATGACATATGGGATAAAAAGTTTTTGAATGGTATTGATTTTGCTATAATTGATAAAAATTCTGATACGAACAAGACAATATCAGCAGAAGAAGAACAACAAAATGCAAACTCAGAGGTGGGAATCACAAAAGAGGGGGTGCATAACGAAGTAAAGCCCAAACGAAAG…	MEARKQVPHVLWQHKDFHNNFECHAWITVSQSYTVEELLKDMLHKLCKEKLETPLHNDSLIYEMRNHLCHKRYVILFHDIWDKKFLNGIDFAIIDKNSDTNKTISAEEEQQNANSEVGITKEGVHNEVKPKRKTHFAPSQYEDPTGALFKLTQKGSVGQYLSEFEDLANRIIGLPPPFILSCFISGLSPEIRREVQALQPLTLVQAAGLARLQEEKLADIRPPPRPRPPPPPQLSPHTNPNLNTSRSPSLPPLLLAPPRQPPPVMKRLSSEEITSRRECGLCFNCDERYHRGHRCASRVFLLITEEKDPPSVNIDPNNPQPNTIPDPPEVTDPYPAHISLHSLSGHHAPETLRFEGVIHAHPLVLLVDGGSTHNFVQQQLVSRLGLPCRSTPPLRVMVG…
HK_NBARC_NBARC.Chr18.19	Chr18	TGFam.AUG	8562748	8573889	ATGCGGCTGAGAGAAGCAGCTTTTCGCATGGAAGATGTCATCGATGAATATAACATCTCCTGTGAGGATAAGCAACCTGATGATCCTCGATGTGCAGCTTTACTATGTGAGGCTGTTGCCTTCATCAAAACTCAAATCCTTCTCTTTCAAAGTGCGTATAAGATTCAGGATGTTAAATCCCTTGCTCGTGCTGAAAGAGATGGTTTCCAAAGCCATTTTCCTTTAGAGCAAAGACCAACCAGTTCTAGAGGAAATCAAGATGTCACCTGGCAGAAACTTAGAAGGGATCCTCTCTTTATTGAGGAGGATGAGGTTGTGGAGCTCGATAACGATAGAGCTACATTGAAATATTGGTTGACAAATGGAAGAGAAAAGCGCACAGTCATCTCCGTGGTGGGA…	MRLREAAFRMEDVIDEYNISCEDKQPDDPRCAALLCEAVAFIKTQILLFQSAYKIQDVKSLARAERDGFQSHFPLEQRPTSSRGNQDVTWQKLRRDPLFIEEDEVVELDNDRATLKYWLTNGREKRTVISVVGIAGVGKTTLAKQVYDQVRNNFECHALITVSQSYSVEGLLRHMLNELCKENKEDHPKDVSTIESLTEEVRNRLRNKRYVVLFDDVWNGKFWDHIESAVIDKKNGSRILITTRDEKVAEYCRKSSFVEVHKLEKPLTEEESLKLFCKKAFQYSSDGDCPEELKDISLEIVRNCKGLPLAIVAIGGLLSQKDESAPEWGQFSRDLSLDLERNSELNSITKILGLSYDDLPINLRSCFLYFGMYPEDYEVQSDRLIRQWIAEGFVKHETG…
HK_NBARC_NBARC.Chr18.20	Chr18	TGFam.AUG	8597222	8599803	ATGTCAAAACCCTTAAGGTTTGAGGTTAAGGTGTGGTGTCAAAGACACTTATGTGGTTGCTCAAGGCTCACTGGTGCAAATCTCCTCGATGACTTCCATAACAACTTCGAGTGTCATGCATGGATCACAGTGTCTCAATCCTACACTGTAGAAGAATTGCTGAAGGATACGTTGCACAAGCTATGCAAAGAAAAATTGGAGACACCTCTTCACAATGATTCATTGATAGATGAAATGAGAAATCACTTGCGCCACAAAAGGTATGTCGTCCTGTTTCATGACGTATGGGATAAAAAGTTTTCGGATGGTATTGATTTTGCTATAATTGATAAAAATTCGGACACAGACTATGAAGTTAAATCTGGAAGATTGATTACGCAGTGGATAGCTGAAGGGTTT…	MSKPLRFEVKVWCQRHLCGCSRLTGANLLDDFHNNFECHAWITVSQSYTVEELLKDTLHKLCKEKLETPLHNDSLIDEMRNHLRHKRYVVLFHDVWDKKFSDGIDFAIIDKNSDTDYEVKSGRLITQWIAEGFVKHENGRTLEEVAQQHLMELITTSLVQVSSFTIDDKVKGCRVHDLIHEMILGNIKDTWICLYIDEHNQLVSSAIVRRLTIGSDSNDLIENTERSRIRSVLIFTKQKLPEYLISGILEKYIPLKIESLPKSIGKLQNLETLDVRQTKVFQIPKEISKLLKLRHLLANEISSIAVKDSIGGMTSLQKICLL*
HK_NBARC_NBARC.Chr18.21	Chr18	TGFam.PM	8603696	8606461	ATGGCAGAAACTGCAGTGTCCTTGGCAGGTCAGCAGGCGCTTCCAAAAATATTGGAAGCTGTCAAAATGTTGAGAGATCTCCCAAAAGAAGTTAGAGACATTACAGATGAACTTGAAAGCTTTCAAGATTTCATCAATGATGCTGATAAAGTGACTGAAGCCGAAGAAGATGATGGAAGGCGTCATAGAATAAAAGAAAGGGTGATGCGGCTGAGAGAAGCAGCTTTTCGCATGGAAGATGTCATCGATGAATATAACATCTCCTGTCAGGATAAGCAACCTGATGATCCTCGATGTGCAGCTTTACTATGTGAGGCTGTTGCCTTCATCAAAACTCAAATCCTTCTCCTTCAAAGTGCGTATAAGATTCAGGATGTTAAATCCCTTATTCGTGCTGAA…	MAETAVSLAGQQALPKILEAVKMLRDLPKEVRDITDELESFQDFINDADKVTEAEEDDGRRHRIKERVMRLREAAFRMEDVIDEYNISCQDKQPDDPRCAALLCEAVAFIKTQILLLQSAYKIQDVKSLIRAERDGFQSHFPLEQRQTSSRGNQDITSQKLRRDPLFIEEDEVVGLDGPRGILKNWLTKGREKRTVISVVGIAGVGKTTLAKQVYDQVRNNFECHALITVSQSFSAEGLLRHMLNELCKEKKEDPPKDVSTIESLTEEVRNRLRNKRYVVLFDDIWNEKFWDHIESAVIDNKNGSRILITTRDEKVAEYCRKSSFVEVHKLEKPLTEEESLKLFCMKAFQYSSDGDCPEELKDVSLEIVRKCKGLPLAIVAIGCLLSQKDESAPEWKQF…
HK_NBARC_NBARC.Chr18.22	Chr18	TGFam.ISGAP	8624158	8625956	ATGGCTGAAACTGCAGTGTCCTTGGCTGGTCAGCATGCGCTTCCAAAAATATTGGAAGCTGTCAAAATGCTGAGAGATCTCCCAAAGGAAGTTAGAGACATTACAGATGAACTTGAAAGCTTTCAAGATTTCATCAATGATGCTGATAAAGTGGCTGAAGCTGAACAAGATGATGGAAGGCGTCATAGAATAAAAGAAAGGGTGATGCGGCTGAGAGAAGTAGCTTTTTGCATGGAAGATGTCATTGATGACTATAACATCTCCTGTGAGGATAAGCAACCTGATGATCCTCGATGTGCAGCTTTACTATGTGAGGCTGTTGCCTTCATCAAAACTCAAATCCTTCTCCTTCAAAGTGCATATAAGATTCAGGATGTAAAATCCCTTGTTCGTGCTGAA…	MAETAVSLAGQHALPKILEAVKMLRDLPKEVRDITDELESFQDFINDADKVAEAEQDDGRRHRIKERVMRLREVAFCMEDVIDDYNISCEDKQPDDPRCAALLCEAVAFIKTQILLLQSAYKIQDVKSLVRAERDAFQSHFPLEQRPTSSRGNQDVTWQKLRRDPLFIEEDEVVGLDGARVSQSFSAEGLLRHMLNELCKEKKEDPPKDVSTIESLTEEVRNRLHNKRYVVLFDDVWNGKFWDHIESAVIDNKNGSRILITTRDEKVAEYCRKSSFVEVHKLEKPLTEEESLKLFCKKAFQYSSDGDCPEELKDISLEIVRKCKVLPLAIVAIGGLLSQKDESAPEWGQFSRDLSLDLERNSELNSITKILGLSYDDLPINLRSCLLYFGMYPEDYEVE…
HK_NBARC_NBARC.Chr18.23	Chr18	TGFam.ISGAP	8633502	8636270	ATGGCAGAAACTGCAGTGTCCTTGGCAGGTCAGCAGGCGCTTCCAAAAATATTGGAAGCTGTTAAAATGTTGAGAGATCTCCCAAAAGAAGTTAGAGACATTACAGATGAACTTGAAAACTTTCAAGATTTCATCAATGATGCTGATAAAGTGGCTGAAGCTGAAGAAGATGATGGAAGGCGTCATAGAATAAAAGAAAGGGTGATGCGGCTGAGAGAAGCAGCTTTTCGCATGGAAGATGTCATCGATGAATATGAATATAACATCTCCTGTGAGGATAAGCAACCTGATGATCCTCGATGGGCAGCTTTACTAGGTGAGGCTGTTGCCTTCATCAAAACTCAAATCCTTCTCCTTCAAAGTGCGTATAAGATTCAGGATGTTAAATCCCTTGTTCGT…	MAETAVSLAGQQALPKILEAVKMLRDLPKEVRDITDELENFQDFINDADKVAEAEEDDGRRHRIKERVMRLREAAFRMEDVIDEYEYNISCEDKQPDDPRWAALLGEAVAFIKTQILLLQSAYKIQDVKSLVRAERDGFQSHFPLEQRQTSSRGNQDITWQKLRRDPLFIEEDEVVGLDGPRGILKNWLTKGREKRTVISVVGIAGVGKTTLAKQVYDQVRNNFECHALITVSQSFSAEGLLRHMLNELCKEKKEDPPKDVSTIESLTEEVRNRLRNKRYVVLFDDVWNEKFWDHIESAVIDNKNGSRILITTRDEKVAEYCRKSSFVEVHKLEKPLTEEESLKLFCKKAFQYSSDGDCPEELKDISLEIVRKCKGLPLAIVAIGGLLSQKDESAPEWG…
HK_NBARC_NBARC.Chr18.24	Chr18	TGFam.ISGAP	8645549	8649434	ATGGCAGAAACTGCAGTGTCCTTGGCTGGTAAGCATGCCCTTCCAAAAATATTGGAAGCTATCAAAATGGTGAGAGATCTCCCAAAAGAAGTTAGAGACATTACAGATGAACTTGAAAGGTTTCAAGATTTCATTAATGATGCTGACAAAGTGGCTGAAGCTGAACAAGATGATGGAAGGCGTCATAGAATAAAAGAAAGGGTGATGCGGCTGAGAGAAGCAGCTTTCCGCATGGAAGATGTCATCGATGAATATAACATCTCCTGTGAGGATAAGCAACCTGATGATCCTCGATGTGCAGCTTTACTATGTGAGGCTGTTGACTTCATCAAAACTCAAATCCTTCGCCTTCAAAGTGCGTACAAGATTCAGGATGTTAAATCGCTTGTTCGTGCTGAA…	MAETAVSLAGKHALPKILEAIKMVRDLPKEVRDITDELERFQDFINDADKVAEAEQDDGRRHRIKERVMRLREAAFRMEDVIDEYNISCEDKQPDDPRCAALLCEAVDFIKTQILRLQSAYKIQDVKSLVRAERDGFQSHFPLEPRLTSSRGNQDVTWKKLRMDPLFIEENDVVGLDGPRDTLKNWLTKGREKRTVRNNFDYYALITVSQSYSAEGLLRRLLDELCKVKKEDPPKGVSNMESLTEEVRNRLRNKRYVVLFDDVWNETFWDHIESAVIDNKNGSRILITTRDVKVAGYCKKSSFVEVLKLEEPLTEEESLKLFSKKAFQYSSDGDCPEELKDMSLEIVRKCKGLPLAIVAIGCLLSQKDESAPEWKQFSENLCLDQLERNSELNSITKIL…
HK_NBARC_NBARC.Chr18.25	Chr18	TGFam.AUG	8650208	8656957	ATGGTGAGAAAGGCTGATAAGACCTCATGGAAGAGGAAACGAACTGAGGAAAACGATGGAAGAAGACTAGGTGTGACCTCACCACCCAATCCAATTGATGGGAGACCCTATGTCAGGGAGGATGAGAACTACCTTAGGGAATTAGAGACAAGGCAACAGACTCGCCATTATGGTATTCAGAATCCTAATTCTGTAATGAGTAATTATCTATCTGTGCATGATCCTGCTAATAGCCACCACATGGGGCCAAGTTATCCAGCCCTTGCTTTAGCATCTGAGCCTTATGTGATGAATACACCAGCCATGCAGCGATATGCACCTCGCCTAGACGAATTAAACCATGCAAGGATGGATCCTTTGGGGTCTGAACCTGCTATAGTTGGTAGAAACGGTGCTTTT…	MVRKADKTSWKRKRTEENDGRRLGVTSPPNPIDGRPYVREDENYLRELETRQQTRHYGIQNPNSVMSNYLSVHDPANSHHMGPSYPALALASEPYVMNTPAMQRYAPRLDELNHARMDPLGSEPAIVGRNGAFERSALPPGYGSRMPGFAAASRIPKGFMRLLFLLPILNLFPTLPFNLSSFHLGGPTTFFLDKQPDDPRCAALLCEAVAFIKTQILLLQSAYKIQDVKSLVRAERYGFQSHFPLEQRPTSSRGNQDITWQKLRRDPLFIEEDEVVGLDGPRGILENWLTKGRKKRTVISVVGIAGVGKTTLAKQVYDQVRNNFECHALIKVSQSFSAEGLLRHMLNELCKEKEEDPPKDVSTIESLTEEVRNRLRNKRYVVLFDDVWNETFWDHIESA…
HK_NBARC_NBARC.Chr18.26	Chr18	TGFam.AUG	8664529	8666700	ATGGCAGAAACTGCAGTGTCCTTGGCTGGTCAGCATGCACTTTCAAAAATATTGGAAGCTGTCAAAATGCTGAGAGATCTCCCAAAAGAAGTTAGAGACATTACAGATGAACTTGAAAGCTTTCAAGATTTCATCAATGATGCTGATAAAATGGCTGAAGCTGAAGAAGATGATGGAAGGCGTCATAGAATAAAAGAAAGGGTGATGCGGCTGAGAGAAGCAGCTTTTCGCATGGAAGATGCCATCGATGAATATAACATCTCCTGTGAGGATAAGCAACCTGATGATCCTCGATGTGCAGCTTTACTATGTGAGGCTGTTGACTTCATCAAAACTCAAATCCTTCGCCTTCAAAGTGCGTACAAGATTCAGGATGTTAAATCCCTTGTTCGTGCTGAA…	MAETAVSLAGQHALSKILEAVKMLRDLPKEVRDITDELESFQDFINDADKMAEAEEDDGRRHRIKERVMRLREAAFRMEDAIDEYNISCEDKQPDDPRCAALLCEAVDFIKTQILRLQSAYKIQDVKSLVRAERDGFQSHFPLEQRQTNEVVGLDGPRGILKNWLTKGREKRTVISVVGIPGVGKTTLAKQVYDQEDRPKDVSTIELLTEEVRNRLCNKRYVVLFDDIWNGKFWDHIESAVIENKNGSRILITTRDEKVAEYCRKSSFVEVHKLEKPLTEEESLKLFCKKAFQYNSDGDCPEELKDISLEIVRKCKGLPLAIVAIGGLLSQKDESLSYDDLPINLRSCLLYFGMYPEDYEVGQQYLSGLVRRSLVQVSSFRIDGKVKKCRVHDLIHDMI…
HK_NBARC_NBARC.Chr18.27	Chr18	TGFam.PM	8684660	8692322	ATGGCAGAAACTGCAGTGTCCTTGGCTGGTCAGCATGCGCTTCCAAAAATATTGGAAGCTGTCAAAATGCTGAGAGATCTCCCAAAAGAAGTTAGAGACATTACAGATGAACTTGAAAGCTTTCAAGATTTCATCAATGATGCTGATAAAGTGGCTGAAGCTGAACAAGATGATGGAAGGCGTCATAGAATAAAAGAAAGGGTGATGCGGCTGAGAGAAACAGCTTTTCGCATGGAAGATGTCATCGATGAATATAACATCTCCTGTGAGGATAAGCAACCTGATGATCCTCCATGTGCAGCTTTACTATGTGAGGCTGTTGACTTCATCAAAACTCCAATCCTTCGCCTTCAAAGTGCGTACAAGATTCAGGATGTTAAATCCCTTGTTCGTGCTGAA…	MAETAVSLAGQHALPKILEAVKMLRDLPKEVRDITDELESFQDFINDADKVAEAEQDDGRRHRIKERVMRLRETAFRMEDVIDEYNISCEDKQPDDPPCAALLCEAVDFIKTPILRLQSAYKIQDVKSLVRAERDGFQSHFPLEQRQTSSRGNQDITWQKHRRDPLFIEEDEVVGLDGHRGILKNWLTKGREKRTAISVVGIAGVGKTTLAKQVYDQVRNNFECHALITVSQSFSTEGLLRHMLNEHCKEKKEDPPKDVSTIESLTEEVRNRWRNKRYVVLFDDVWNGKFWDHIESAVIDNKNGSRILITTRDEKVAEYCRKSSFVEVHKLEKPLTEEESLKLFCKKAFQYSSDGDCPEELKDISLEIVRKCKGLPLAIVAIGGLLPQKDESAPEWGQF…
HK_NBARC_NBARC.Chr18.28	Chr18	TGFam.PM	8701851	8704570	ATGGCAGAAACTGCAGTGTCCTTGGCTGGTAAGCATGCCCTTCCAAAAATATTGGAAGCTGTCAAAATGGTGAGAGATCTCCCAAAAGAAGTTAGAGACATTACAGATGAACTTGAAAGCTTTCAAGATTTCATTAATGATGCTGATAAAGTGGCTGAAGCTGAACAAGATGATGGAAGGCGTCATAGAATAAAAGAAAGGGTGATGCGGCTGAGAGAAGCAGCTTTTCGCATGGAAGATGTCATCGATGAATATAACATCTCCTGTGAGGATAAGCAACCTGATGATCCTCGATGTGCAGATTTACTATGTGAGGCTGTTGCCTTCATCAAAACTCAAATCCTTCTCCTTCAAAGTGCATATAAGATTCAGGATGTTAAATCGCTTGTTCGTGCTGAA…	MAETAVSLAGKHALPKILEAVKMVRDLPKEVRDITDELESFQDFINDADKVAEAEQDDGRRHRIKERVMRLREAAFRMEDVIDEYNISCEDKQPDDPRCADLLCEAVAFIKTQILLLQSAYKIQDVKSLVRAERDGFQSHFPLEPRLTSSRGNQDVTWQKLRMDPLFIEEDDVVGLDGPRDTLKNWLTKGREKRTVISVVGIPGVGKTTIAKQVYDQVRNNFECHALITVSQSYSAEGLLRRLLDELCKLKKEDPPKDVSNMESLTEEVRNRLRNKRYVVLFDDVWNETFWDHIESAVIDNKNGSRILITTRDEKVAGYCKKSSFVEVLKLEEPLTEEESLKLFSMKAFQYSSDGDCPEELKDISLEIVRKCKGLPLAIVAIGGLLSQKDESAPEWGQF…
HK_NBARC_NBARC.Chr18.29	Chr18	TGFam.PM	8732940	8735434	ATGGCAGAAACTGCAGTGTCCTTGGCTGGTAAGCATGCCCTTCCAAAAATATTGGAAGCTATCAAAATGGTGAGAGATCTCCCAAAAGAAGTTAGAGACATTACAGATGAACTTGAAAGCTTTCAAGATTTCATTAATGATGCTGATAAAGTGGCTGAAGCTGAACAAGATGATGGAAGGCATCATAGAATAAAAGAAAGGGTGATGCGGCTGAGAGAAGCAGCTTTTTGCATGGAAGATGTCATCGATGAATATAACATCTCCTGTGAGGATAAGCAACCTGGTGATCCTCGATGTGCAGCTTTACTATGTGAGGCTGTTGACTTCATCAAAACTCAAATCCTTCGCCTTCAAAGTGCGTACAAGATTCAGGATGTTAAATCGCTTGTTCATGCTGAA…	MAETAVSLAGKHALPKILEAIKMVRDLPKEVRDITDELESFQDFINDADKVAEAEQDDGRHHRIKERVMRLREAAFCMEDVIDEYNISCEDKQPGDPRCAALLCEAVDFIKTQILRLQSAYKIQDVKSLVHAERDGFQTHIPLEPRLTSSRGNQDVTWQKLRMDPLFIEEDDVVGLDGPRDTLKNWLTKGREKRTVISVVGIPGVGKTTLAKQVYDQVRNNFECHALITVSQSYSAEGLLRRLLDELCKLKKEDPPKDVSNMENNVVLFDDVWNGKFWDHIESAVIDNKNGSRILITTRDEKVAGYCKKSSFVEVLKLEEPLTEEESLKLFSKAFQYSSDGDCPEELKDISLEIVRKCKGLPLAIVAIGGLLSQKDESAPEWGEFSRDLSLHLERNFEL…
HK_NBARC_NBARC.Chr18.30	Chr18	TGFam.PM	8760308	8763073	ATGGCAGAAACTGCAGTGTCCTTGGCTGGTCAGCATGCCCTTCCCAAAATATTGGAAGCTGTCAAAATGCTGAGAGATCTCCCAAAAGAAGTTAGAGACATTACAGATGAACTTGAAAGCTTTCAAGATTTCATCAATGAAGCTGATAAAGTGGCTGAAGCCGAAGAAGATGATGGAAGGCGTCATAGAATAAAAGAAAGGGTCATGCGGCTGAGAGAAGCAGCTTTTCGCATGGAAGATGCCATCGATGAATATAACATCTCCTGTGAGGATAAACAACCTGATGATCCTCGATGTGCAGCTTTACTATGTGAGGCTGTTGCCTTCATCAAAACTCAAATCCTTCGCCTTCAAAGTGTGTATAAGATTCAGGATGTTAAATCCCTTGTTCGTGCTGAA…	MAETAVSLAGQHALPKILEAVKMLRDLPKEVRDITDELESFQDFINEADKVAEAEEDDGRRHRIKERVMRLREAAFRMEDAIDEYNISCEDKQPDDPRCAALLCEAVAFIKTQILRLQSVYKIQDVKSLVRAERDGFQSHFPLEQRQTSSRGNQDITWQKLRRDPLFIEEDEVVGLDGPRGILKNWLTKGREKRTVISVVGIAGVGKTTLAKQVYDQVRNNFECHALITVSQSFSAEGLLRHMLNELCKEKKEDPPKDVSTIESLTEEVRNHLRNKRYVVLFDDVWNGKFWDHIESAVIDNKNGSRILITTRDEKVAEYCRKSSFVEVHKLEKPLTEEESLKLFCKKAFQYSSDGDCPEELKDISLEIVRKCKGLPLAIVAIGGLLSQKDESAPEWGQF…
HK_NBARC_NBARC.Chr18.31	Chr18	TGFam.AUG	8778853	8780229	ATGGCAGAAACTGCAGTGTCCTTGGCTGGTAAGCATGCCCTTCCAAAAATATTGGAAGCTGTCAAAATGGTGAGAGATCTCCCAAAAGAAGTTAGAGACATTACAGATGAACTTGAAAGCTTTCAAGATTTCATTAATGATGCTGATAAAGTGGCTGAAGCTGAACAAGATGATGGAAGGTGTCATAGAATAAAAGAAAGGGTTATGCGGCTGAGAGAAGCAGCTTTTCGCATGGAAGATGTCATCGATGAATATAACATCTCCTGTGAGGATAAGCAACCTGGTGATCCTCGATATGCAGCTTTACTATGTGAGGCTGTTGACTTCATCAAAACTCAAATCCTTCGCCTTCAAAGTGCGTACAAGATTCAGGATGTTAAATCGCTTGTTCGTGCTGAA…	MAETAVSLAGKHALPKILEAVKMVRDLPKEVRDITDELESFQDFINDADKVAEAEQDDGRCHRIKERVMRLREAAFRMEDVIDEYNISCEDKQPGDPRYAALLCEAVDFIKTQILRLQSAYKIQDVKSLVRAERDGFQTHFPLEPRLTSSRGNQDVTWQKLRMDPLFIEEDDVVGLDGPRDTLKNWLIKGSEKRTVISVVGIPGVGKTTLAKQVYDQVRNNFECHTLIRVSQSYSAEGLLRRLLDELCKVKKEDPPKDVSNMESLTEEVRNHLRNKRYVVLFDDVWSETFWDHIESAVMDNKNASRILITTRDEKLEEPLTEEESLKLFSKKAFQYSSDGDCPEELKDISLEIVRKCKVLPLVIVAIGGLLSQKDESAPEWGQFSRDLSLDLERDSKLN…
HK_NBARC_NBARC.Chr18.32	Chr18	TGFam.ISGAP	8790217	8790510	ATGCATGGATCACAATCCTACACTGTAGAAGAATTGCTGAAGGATATGTTGCACAAGCTATGCAAAGAAAAATTGGAGACACCTCTTCATAATGATTCATTGATATATGAAGTGAGAAACCACTTGCGCCAAAAGAGGTATGTTGTCCTGTTTCATGAGGTATGGGATAAAAAGTTTTCGGATGGTATTGATTTTGCTATAATTGATAAAAATTCGGACACAGAGGTATCAATCACAACTTCGGACAGAGGTTGCGGAGTTTTGTCAGATAACTTCCTTCATTCAGGTGTATAA	MHGSQSYTVEELLKDMLHKLCKEKLETPLHNDSLIYEVRNHLRQKRYVVLFHEVWDKKFSDGIDFAIIDKNSDTEVSITTSDRGCGVLSDNFLHSGV*
HK_NBARC_NBARC.Chr18.33	Chr18	TGFam.PM	8811189	8812325	ATGGCAGAAACTGCAGTGTCCTTGGCTGGTAAGCATGCCCTTCCAAAAATATTGGAAGCTGTCAAAATGGTGAGAGATCTCCCAAAAGAAGTTAGAGACATTACAGATGAACTTGAAAGCTTTCAAGATTTCATTAATGATGCTGATAAAGTGGCTGAAGCTGAACAAGATGATGGAAGGTGTCATAGAATAAAAGAAAGGGTGATGCGGCTGAGAGAAGCAGCTTTTCGCATGGAAGATGTCATCGATGAAGATGAATATAACATCTCCGGTGAGGATAAGCAACCTGGTGATCCTCGATGTGCAGCTTTACTATGTGAGGCTGTTGACTTCATCAAAACTCAAATCCTTCGCCTTCAAAGTGCGTACAAGATTCAGGATGTTAAATCGCTTGTTCGT…	MAETAVSLAGKHALPKILEAVKMVRDLPKEVRDITDELESFQDFINDADKVAEAEQDDGRCHRIKERVMRLREAAFRMEDVIDEDEYNISGEDKQPGDPRCAALLCEAVDFIKTQILRLQSAYKIQDVKSLVRAERDGFQTHFPLEPRLTSSRGNQDVTWQKLRMDPLFIEEDDVVGLDGPRDTLKNWLTKGREKRTVISVVGIPGVGKTTLAKQVYDQVRNNFECHTLITVSQSYSAEGLLRRLLDELCKVKKEDPPKDVSNMESLTEEVRNRLRNKRYVVLFDDIWSETFWDHIESAVMDNKNGSRILITTRDEKVAGYCKKSSFVEVHKLEKPLTEEESLKLFLRRHFSIVPMEIVQKNLKIYLLKLLESVKVYL*
HK_NBARC_NBARC.Chr18.34	Chr18	TGFam.AUG	8825352	8843767	ATGTTGGGGAGTCAGGATAAGAGATTGGGGAGACAATACCCGTACCCGTTCTGTCTCATTGCCATGTCTACTTATGGTTTCTTGTCTTCTACGCTCTACAGTATACAACCACGTAAACTGTACAATTATGGGTTTAGTGGGTCCCTCGTGTGCCAATCAGCTGCCATGTTGGCCACGTTCCTTGTGTCTGGGCTTGTGCATGAGTTAATCTATTATCATGTTACACGTGTACCTCCCACGTGGGAAGTTACGTGTTTTTTTGTGCTTCACGGTGTGTGCACGGTGGCGGAGGTGGCTGTTAAGAAGGTGGTTCTCCGTCGTGGATGGCGGCTGCACCGTGCCGTGTCAGGGCCACTCGTGGTGGCATTCTTGGCTATCTCAGCGAATTGGCTGTTTTTC…	MLGSQDKRLGRQYPYPFCLIAMSTYGFLSSTLYSIQPRKLYNYGFSGSLVCQSAAMLATFLVSGLVHELIYYHVTRVPPTWEVTCFFVLHGVCTVAEVAVKKVVLRRGWRLHRAVSGPLVVAFLAISANWLFFPQLLRNEMDRKSSEENLCHLKYLSFRYAGIESLLKSIGKLQNLETLDIRETGVSEMPEEISKLTKLRHLLSDYITSIQWKDIGGMTSLQEIPPVIIDDDGVVIGEVGRLKQLRELTVRDFKGKHKETLCSLINEMPLLEKLLIDLYIMSPMSTLRKLVLWGTLTRLPDYWTSQFPNLVQLRLGGSRLTNDALKSLKNMPRLMHLCFVLNAYEGETLHFQCGGFQKLKQLFLQSLDKLKSILIDRGALCSVEEIGLEYLSQLKTVPS…
HK_NBARC_NBARC.Chr18.35	Chr18	TGFam.PM	8846705	8849467	ATGGCAGAAACTGCAGTGTCCTTGGCAGGTCAGCAGGCGCTTCCAAAAATATTGGAAGCTGTCAAAATGTTGAGAGATCTCCCAAAAGAAGTTAGAGACATTACAGATGAACTTGAAAGCTTTCAAGATTTCATCAATGATGCTGATAAAGTGACTGAAGCCGAAGAAGATGATGGAAGGCGTCATAGAATAAAAGAAAGGGTGATGCGGCTGAGAGAAGCAGCTTTTCGCATGGAAGATGTCATCGATGAATATAACATCTCCTGTCAGGATAAGCAACCTGATGATCCTCGATGTGCAGCTTTACTATGTGAGGCTGTTGCCTTCATCAAAACTCAAATCCTTCTCCTTCAAAGTGCGTATAAGATTCAGGATGTTAAATCCCTTATTCGTGCTGAA…	MAETAVSLAGQQALPKILEAVKMLRDLPKEVRDITDELESFQDFINDADKVTEAEEDDGRRHRIKERVMRLREAAFRMEDVIDEYNISCQDKQPDDPRCAALLCEAVAFIKTQILLLQSAYKIQDVKSLIRAERDGFQSHFPLEQRQTSSRGNQDITSQKLRRDPLFIEEDEVVGLDGPRGILKNWLTKGREKRTVISVVGIAGVGKTTLAKQVYDQVRNNFECHALITVSQSFSAEGLLRHMLNELCKEKKEDPPKDVSTIESLTEEVRNRLRNKRYVVLFDDIWNEKFWDHIESAVIDNKNGSRILITTRDEKVAEYCRKSSFVEVHKLEKPLTEEESLKLFCMKAFQYSSDGDCPEELKDVSLEIVRKCKGLPLAIVAIGGLLSQKDESAPEWGQF…
HK_NBARC_NBARC.Chr18.36	Chr18	TGFam.ISGAP	9401196	9403966	ATGGATATAGCAAAGGAAATTGCAGTGCCTTTGGCTGCTGAGCATTTGCTTCCGCGCTTGAAGAAAGCACTGAATGCGGTCATGAACGTCCCTAAAGATGTTGCTGACATGAAAAACAAACTTGATAGGATTCAATCCATCATTCATGATAAAGAGAAGAAGGCAGCAGATGAAGAAGGCAACAAGGCAAAGGTGAAACAGCTGGTGCAAACATCCTTTCACATGGAAGATATTATTGATGAATGCGCCATTGTTGAGGAAAGGCAGCTTCGTGATGATGCTGGATGTGTAGCTCTACCTTGCAAGGCCGTTGATTTCGTCAAAACTAAGGCCTCTTGCCTTCATTTTGCGTATATGAATGAGGGAGTTGAATCAGAAATTGCTGCAACGAAGGACAAA…	MDIAKEIAVPLAAEHLLPRLKKALNAVMNVPKDVADMKNKLDRIQSIIHDKEKKAADEEGNKAKVKQLVQTSFHMEDIIDECAIVEERQLRDDAGCVALPCKAVDFVKTKASCLHFAYMNEGVESEIAATKDKNESEFGSQMHPPGGNQNSMFRNLRDAPLYIKDDEVVGFDVARNELIGWLVSDRSERTVISVVGIGGLGKTTLAKKVFDKVAEKFKRHAWITVSQSYTEVGLLRDLLQELRKENKENHPQNLSTMDQKSLRDEVINHLRDKRYVIVFDDVWNTSFWDDMEFALIDDKIGSRVFITTRNKEVPNFCKRSAIVLQHDLQPLTLEQSLNLFYKRAFGSDLGGRCPDHLKDISAEMVKKRDATCWKKFSENLSKELEDGLSPVTKILSFSY…
HK_NBARC_NBARC.Chr18.37	Chr18	TGFam.ISGAP	9413329	9416040	ATGGAGAAGTTGCAGGAAATTGCAGCATCCTTGGCTGTTGATTATTTGCTTCCACCCTTGAAGAAAGCTGTGAACTCAGTCATGGAGGTTCCAAAAGATGTTGCAGACATGAAAGACAAACTTGATAGGATTCAAGCCATCATTCATGATGTAGATAAGATGGCAGCAGCTGAAGAAGGCAACTCACATGATGGTCTCAAAGCAAAGCTGAAGCAGCTTGTGGAAACATCTTTTTGCATGGAAGATATCGCTGATGAATACATGATCCATGAGGAAAAGCAGCTTGGTGATGATCCTGGATGTGCAGCTTTACCTTGTAAGGCTATTGATTTCGTCAAAACTACGGCCTCTCGTCTTCAATTTGCATACATGAACGAGGACGTGAAATCCGAATTTCGT…	MEKLQEIAASLAVDYLLPPLKKAVNSVMEVPKDVADMKDKLDRIQAIIHDVDKMAAAEEGNSHDGLKAKLKQLVETSFCMEDIADEYMIHEEKQLGDDPGCAALPCKAIDFVKTTASRLQFAYMNEDVKSEFRGIKERNESEDSSQIQSSGGNQNIPFDNLRMAPLYLKEAEVVGFDGPRDTLEKWLKEGRKKRTVISVVGMGGLGKTTLAKKVFDKVRNHFTLHAWITVSQSYTIEGLLRDMLLNFVEEEKRVDHASMDKKSLIDQVRKHLHHKRYVVVFDDVWNTLFWQEMEFALIDDENGSRILMTTRNQDVVNSCKRSAVIKVHELQPLTLEKSLELFYTKAFGSDFDGHCPSNLKDISTEIVKKCQGLPLAIVVIGGLLFNEKREILKWQRFYQ…
HK_NBARC_NBARC.Chr18.38	Chr18	TGFam.ISGAP	9481268	9483994	ATGGATAAATTAAAGGAAATTGCAGCGTCCTTGGCTGTTGATTATTTGCTTCCACCCTTGAAGAAAGCTGTGAACTCAGTCATGGAGGTTCCAAAAGATGTTGCAGACATGAAAGACAAACTTGATGGGATTCAAGCCATCATTCATGATGCAGATAAGATGGCAGCAGCTGAAGACAGCAAATCACGTGACGAAATCAAAGCAAAGGTGAAGCAGCTTGTGGAAACATCTTTTCGCATGGAAGATATCATTGATGAATACACCATCCATGAGGAAAAGCAGCTTGGTGATGATCCTGGATGTGCAGCTTTACCTTGTAAGGCTATTGATTTTGTCAAAACTACGGCCTCTCGTCTTCAATTTGCATACATGAACGAGGACGTGAAATCCGAATTTGGT…	MDKLKEIAASLAVDYLLPPLKKAVNSVMEVPKDVADMKDKLDGIQAIIHDADKMAAAEDSKSRDEIKAKVKQLVETSFRMEDIIDEYTIHEEKQLGDDPGCAALPCKAIDFVKTTASRLQFAYMNEDVKSEFGGIKERNGSEDSSQIQSSGGNQNVPFDNLRMAPLYLKEAEVVGFDGPRDTLEKWLKEGQEKRTVISVVGMGGLGKTTLAKKVFDQVRTHFTLHAWITVSQSYTIEGLLRNMLLKFVEEEKRVVEHSQSVPTMDQINKMDKWSLTDEVRNHLRHKRYVVVFDDVWNTLFWQEMEFALIDDENGSRILMTTRNQDVVNSCKRSAVIQVHELQPLTLEKSLELFYTKAFGSDFNGRCPSNLKDISTEIVKKCQGLPLAIVVIGCLLFDEK…
HK_NBARC_NBARC.Chr18.39	Chr18	TGFam.PM	9488145	9494464	ATGGAGAAGTTGCAGGAAATTGCAGCATCCTTGGCTGTTGATTATTTGCTTCCACCCTTGATGAAAGCTGTGACCTCAGTCATGGAGGTTCCAAAAGATGTTGCAGAGATGAAAGACAAACTTGATGGGATTCAAGCCATCATTCATGATGTAGATAAGATGGCAGAAGCTGAAGAAGGCAACTCACATGATGGTCTCAAAGCAAAGGTGAAGCAGCTTGTGGAAACATCTTTTCGCATGGAAGATATCGTTGATGAATACACCATCCATGAGGAAAAGCAGCTTGGTGATGATCCTGGATGTGCAGCTTTACCTTGTAAGGCTATTGATTTCGTCAAAACTACGGCTTCTCTTCTTCAGTTTGCATACATGAATGAGGATGTTAAATCAGAATTTTGT…	MEKLQEIAASLAVDYLLPPLMKAVTSVMEVPKDVAEMKDKLDGIQAIIHDVDKMAEAEEGNSHDGLKAKVKQLVETSFRMEDIVDEYTIHEEKQLGDDPGCAALPCKAIDFVKTTASLLQFAYMNEDVKSEFCTINERNGNEDSSPMKSFGGNQNITFDNLRMAPLYLKEAEVVGFDGPRDTLEKWLKEGRKKRTVISVVGMGGLGKTTLAKKVFDKVRTHFTLHAWITVSQSYTIEGLLRDMLLKFVEEEKRVDHSQNDYSTMDKKSLIDQVRNQLRHKRYVVVFDDVWNNCFWQQMEFALIDNENGSRILITTRNQDVVNSCKRSAVIQVHELQPLTLEKSLELFYTKAFGSEFDGHCPSNLKDISTEIVKKCQGLPLAIVVIGGLLFDEKKEILKW…
HK_NBARC_NBARC.Chr18.40	Chr18	TGFam.PM	9524400	9527093	ATGGCGAACTTACTGGAAATTGTAGCGCCCTTCGCTGTTGATTATTTGCAAACACCCTTGAAGAAAGCTGTGAAGTCAGTCATGGAGGTTCCAAAAGATGTGGCAGACATGAAAGACAAACTTGATGGGATTCAAGCCATCATTCATGATGTAGATAAGATGGCAGCAGCTGAAGAAGGCAACTCACATGATGGTCTCAAAGCAAAGCTGAAGCAGCTGGTGGAAACATCCTTTTGCATGGAAGATATCGTTGATGAATGCATGATCCATGAGGAAAAGCAACTTGGTGATGATCCTGGATGTAAAGCTTTACCTTGTAAGGCTATTGATTTCGTCAAAACTACGGCCTCTCGTCTTCAATTTGCATACATGAATGAGGACGTGAAATCCGAATTTCGT…	MANLLEIVAPFAVDYLQTPLKKAVKSVMEVPKDVADMKDKLDGIQAIIHDVDKMAAAEEGNSHDGLKAKLKQLVETSFCMEDIVDECMIHEEKQLGDDPGCKALPCKAIDFVKTTASRLQFAYMNEDVKSEFRGIKERNGSEDSSQIQSSGGNQNITFHNLRMAPLYLKEAEVLGFDGPGDTLEKWLKEGREERTVISVVGMGGLGKTTLVKKVFDKVRTHFTLHAWITVSQSYTAEGLLRDMLLEFVEEEKRGDYSSMDKKSLIDQVRKHLHHKRYVVVFDDVWNTLFWQEMEFALIDDENGSRILITTRNQDAVNSCKRSAAIQVHELKPLTLEKSLELFYTKAFGSDFNGRCPSNLKDISTEIVKKCQGLPLAIVVIGGLLFDKKREILKWQRFYQ…
HK_NBARC_NBARC.Chr18.41	Chr18	TGFam.PM	9531504	9545089	ATGGAGAAATTGCAGGAAATTGCAGCGTCCTTGGCTGTTGATTATTTGCTTCCACCCTTGAAGAAAGCTGTGAACTCAGTCATGGAGGTTCCAAAAGATGTTGCAGACATGAAAGACAAACTTGATGGGATTCAAGCCATCATTCATGATGTAGATAAGATGGCAGCAGCTGAAGAAGGCAAGTCACGTGACGAAATCAAAGCAAAGGTGAAGCAGCTTGTGAAAACATCTTTTCGCATGGAAGATATCATTGATGAATACACCATCCATGAGGAAAAGGAGCTTGGTGAGGATCCTGGATGTGCAGCTTTACCTTGTAAGGCTATTGATTTCGTCAAAACTACGGCTTCTCTTCTTCAGTTTGCATACATGAATGAGGATGTTAAATCAGAATTTCGT…	MEKLQEIAASLAVDYLLPPLKKAVNSVMEVPKDVADMKDKLDGIQAIIHDVDKMAAAEEGKSRDEIKAKVKQLVKTSFRMEDIIDEYTIHEEKELGEDPGCAALPCKAIDFVKTTASLLQFAYMNEDVKSEFRRINERNGNEDTSQMKSFGGNQNTFDNLRMAPLYLKEAKVVGFDGPRDTLEKWLKEGRKKRTVISVVGMGELGKTTLAKKVFGKVRTHFTLHAWITVSQSYTIEGQLRDLLLKFVEEEKRVDHSQSDYSTMDKKSLIDQVRNRLRHKRYVVVFDDVWNNCFWQQMEFALIDNENGSTILITTRNQDVVNSCKRSAVIQVHELQPLTLEKSLELFYTKAFGSEFDGHYPSNLKDIYTEIVKKCHGLPLAIVRFYQNLSSELGKNPSLS…
HK_NBARC_NBARC.Chr18.42	Chr18	TGFam.AUG	9576368	9578848	ATGGAGAAGTTGCAGGAAATTGCAGCATCCTTGGCTGTTGATTATTTGCTTCCACCCTTGAAGAAAGCTGTGAACTCAGTCATGGAGGTTCCAAGAGATGTTGCAGAGATGAAAGACAAACTTGATGGGATTCAAGCCATCATTCATGATGTAGATAAGATGGCAGCAGCTGAAGAAGGCAACTCACATGATGGTCTCAAAGCAAAGGTGAAGCAGCTGGTGGAAACATCTTTTTGCATGGAAGATATCGTTGATGAATACATGATCCATGAGGAAAAGCAACTTGGTGATGATCCTGGATGTGCAGCTTTACCTTGTAAGGCTATTGATTTCGTCAAAACTACGGCCTCTCGTTTTCAATTTGCATACATGAACGAGGACGTGAAATCCGAATTTGGT…	MEKLQEIAASLAVDYLLPPLKKAVNSVMEVPRDVAEMKDKLDGIQAIIHDVDKMAAAEEGNSHDGLKAKVKQLVETSFCMEDIVDEYMIHEEKQLGDDPGCAALPCKAIDFVKTTASRFQFAYMNEDVKSEFGGIKERNGSEDSSQIQSSGGNQNIPFDNLRMAPLYLKEAEVVGFDGPRDTLEKWLKEGRKKRTVISVVGMGGLGKTTLAKKVFDKVRTHFTLHAWITVSQSYTIEGLLRDMLLKFVEEEKRVDHSSMDKKSLIDQVRKHLHHKRYVVVFDDVWNTLFWQEMEFALIDDENGSRILITTRNQDVVNSCKRSAVIKVHELQPLTLEKSLELFYTKAFGSEFGGHCPSNLKDISTEIVKKCHGLPLAIVVIGGLLFDEKKEILKWQRFYE…
HK_NBARC_NBARC.Chr18.43	Chr18	TGFam.PM	10920575	10922038	ATGATTGTGCAACCAGTTGAAGAGTGGCTGAATGATGTGGAGAAGGTTCTCGAAGATGCGCAGAGGCTGGAAGAAAGGGTGCAAGAAAGCCTAGGCTGTTTGAGCATGACATTTAATTATTCTCTAGCAAAAGAGCCATTTTCGCACCCCGTTGAACTCTCAAGCATGAATTACTTCTTTCCCAAAGACTTTGTGGCCTTGGATTCTAGGAAGCCAACTTATGAAGAGTTACTGAAGGCAATTCAAAATGAGAGGAGGAATTTGATTGGAGTGGTTGGCATGAGAGGTTCAGGTAAAAGCACTTCAGCAAGAGTGGTGGGGAAACAAGTAGAGGAGTCAAAGCTTTTTGACAAGGTGGTTATGACAATTGTATCTCAAGATGCCAAAGTGAGAGATATT…	MIVQPVEEWLNDVEKVLEDAQRLEERVQESLGCLSMTFNYSLAKEPFSHPVELSSMNYFFPKDFVALDSRKPTYEELLKAIQNERRNLIGVVGMRGSGKSTSARVVGKQVEESKLFDKVVMTIVSQDAKVRDIQGQIADHLTFSLAEETELGRALRLSHSCKSMIELFMLNEDEGWTLFKQHAQIDDDSPEELREVAKRVFDKCKGLLVAIVTVARTLNGKTCTSWELAFLRLKTSESIDVQEGLTSTYDCNELEEIVCLDSKEEGQLKYLYAPFESVFPKLRKILIKGSNKSRKIFFPSMISSLPELRELFVHDCNELVEIISSNKARLFPNLSFPSQQVSFPKLGVIEIKSCNNLKTIFFATIVSSLVELMELSICNCNNLEEIISLDSEEAQKHRN…
HK_NBARC_NBARC.Chr18.44	Chr18	TGFam.PM	11698384	11717956	ATGGAACAACAAATTGTACCTGTTGAAAAACTTATTGAATTGAAGTACAAGGACGAAACTCCATTTACTAAGCACTCGAGTGAATTTCAAGGACGCTATGATCAGTTGTCAGCCGCAGGTATCAACTTTGATGATTATGTGTTGGGATTGTTCCTATTAATAACTTTACCTGATTCGTGGGAGACATTCCGGGTTTCCATGATTAGTGATGCCACCAATGGTATTGTTCCTTTGCAAATGACAAAGACTAGTGCTCTTAATGAAGAGATGAGAAGGAAGGCACAAGGTACTTCTTCTCAGTCAGAGGGTGACAGGGACAAGAGCAGGAGCAAGTCTAGGTCTCGGTACAAGAATGTTGAGTGCCATTATTGTCACAAAACATGGCATATCCAGAGGAAT…	MEQQIVPVEKLIELKYKDETPFTKHSSEFQGRYDQLSAAGINFDDYVLGLFLLITLPDSWETFRVSMISDATNGIVPLQMTKTSALNEEMRRKAQGTSSQSEGDRDKSRSKSRSRYKNVECHYCHKTWHIQRNCFIWKNESKDKDNDDDCVTTATSDDLVILHDPDLLNLVSDESIWIIDSGVTLHVTTRKEFFTSYTPLLLRGVKHASDVRFNLIYVQVLDDAGYDNHFGSRMWKLTKGSLVVAEGEKISKLYWTKALVARDSVNAMDMEKSLWHQRLSHISENSGFLRERKRLQCEGFFSHFRHDIEIPNGENAQNCVANMILKFHDDPTVNGFEIVVFLRLVWWAAGKKIPNGENARNCVANMILKFHNDPTVNGFEIVVFLRLVWWDAGKKAVRK…
HK_NBARC_NBARC.Chr18.45	Chr18	TGFam.AUG	11728796	11731949	ATGGCAAAAATGTGGGTGTCCTTGGCTCGAGACAAATTGCTTTCATTGTTAAGCAATAAAGCAAAACTCCTTTGGAACATCCCAAAAAAATTTGTAGACATAAAAACTGAATTAGATTTCATTCAAGCCTTCCTCAAGGATGCAGATAGTAGGGTTGTAGATGAAGGAGACAACACCAATGAGGGGATCAGAATATTGGTGAAAGAGTTTAGGGAAGCATCTTTTCGCATAGAAGATGTCATTGATGAATACTTGATCTATGTGGAACAACAACCTGATGCTCTTGGATGTGCAACTTTGTTCTTTGAGTATGATATTGCACACTTCAATGAATATTTGAAGCATCGTCACCAAATAGCATCAGAGATTCAGCAGATTAAGTCAATTATTGATGGAATC…	MAKMWVSLARDKLLSLLSNKAKLLWNIPKKFVDIKTELDFIQAFLKDADSRVVDEGDNTNEGIRILVKEFREASFRIEDVIDEYLIYVEQQPDALGCATLFFEYDIAHFNEYLKHRHQIASEIQQIKSIIDGIMERGGLGKTTLVGRVFNNEMVMAHFDSHAWITVSQSYTVGKLMRDLLKKLCKEEKKEPPRDVFEMDQDSLIEEMRNYLQQKRYIIVFDDVWSIELWGQIEISMLENNNGCRILITTRSMDVVKSCKNSSFNKMHELKPLTFEKSMELFNRKATPMSQINERCPEDLVNTSSGFVKKCKGLPLAIVAIGSLLDDKEKTPFEWKKISQSLKLIGRILVQVSSFTIDGKAKRCHVHDLLRDMILRKYKDLNFYQHISKEDESVPSGMIP…
HK_NBARC_NBARC.Chr18.46	Chr18	TGFam.AUG	14300001	14302414	ATGATCCTCGAGTGCTTGAAGGAACGAACAGCACGGTTGTTTTGGCCAGTTTTTTATGACTTGGAACCATCACACAGGTTCGGCACCAAACTGGGACTTATGCAGAAGCTTTGGCCAAACATGAGGAGAGGTTTCAGGATGATGAGAAGGACAAGGTGCTTTAAAGGGAGAGAGGCTTTGTCTAAGGCTGCTAATATGGTTGGCTGGCATTTCCAACACAGATCACAATCAGAATCCGAGTTTATTACAAAGATTGTTACAGAGGTATCTAAAAGGATCAATCTCAGTCTTTTACATGTTGCGGATTACCCAATTGGCGTTGAGTCTCCAGTGCTTGTGACATCTCTTCTAGGACACGGATTTGAAGAGGGAGTTAGCATGGTAGGCATTTATGGGGTT…	MILECLKERTARLFWPVFYDLEPSHRFGTKLGLMQKLWPNMRRGFRMMRRTRCFKGREALSKAANMVGWHFQHRSQSESEFITKIVTEVSKRINLSLLHVADYPIGVESPVLVTSLLGHGFEEGVSMVGIYGVGGIGKSTIACAVYNLIAFQFEGLCYLANIKESSSNHDLAQLQETLLDEILGEKDIKVGDVNRGIPIIKRRLHRKKVLLILDDVNKLKQLKVLAGGHDWFGSGSKVIITTRDKHLLNTHGVEKSYEVEQLNDEKLLNYISKPAISYAHGLPLALEVIGSHLFGKSLHVWKSTLDKYEKVLHKEIHEILKVSYDNLEEDEKGIFLDIACFFNSYEICYDKEMLNLHGLQVENVQDMGREIVRQVSTSEPGGRSRLWSNEDIVHVLEEN…
HK_NBARC_NBARC.Chr18.47	Chr18	TGFam.PM	14573328	14576066	ATGGGTGGGATAGGTAAAACGGCCCTTGCTACTACTTTATATGACAAATTATCTCATGAATTTGAAGGCAGTTCCTTCCTCTCAAACGTAAATGAAAAATCAGACAAGCTTGAAAATCACTGTTTTGGTAATTCTGATATGAGTACGCTTCGAGGTAAAAAAGCTCTCATTGTCTTGGACGATGTGGCTACCTCGGAACATCTAGAAAAATTAAAAGTAGATTATGATTTCTTGGAACCAGGAAGTAGAGTCATTGTTACAACTAGAAATAGGGAAATACTTGGCCCCAATGACGAAATTTATCAAGTCAAGGAATTGAGTTCTCATCACTCTGTTCAGCTTTTTTGTTTGACTGTTTTTGGAGAAAAACAACCTAAAGAGGGGTATGAAGACCTATCA…	MGGIGKTALATTLYDKLSHEFEGSSFLSNVNEKSDKLENHCFGNSDMSTLRGKKALIVLDDVATSEHLEKLKVDYDFLEPGSRVIVTTRNREILGPNDEIYQVKELSSHHSVQLFCLTVFGEKQPKEGYEDLSERVLSYCKGIPLALKVMGASLRRKSKEAWESELRKLQKISSMEIHTVLKLSYDGLDHSQKDIFLDIACFFKGRERDWVTRVLDAFDFFAASGIEVLLDKALITISEGNHIEMHDLIQEMGWEIVRQECIKDPGRQSRLWRQEEVQNILKYNRASGKCNFFYLIKGTDVVEGIILSLRKLTEALRLSFDFLAKMTNLRFLQFYDGWDDYGSKVPVPTGFESLPDKLRYLHWEGFCLESLPLNFCAEQLVELYMPFSKLKKLWDGVQN…
HK_NBARC_NBARC.Chr18.48	Chr18	TGFam.ISGAP	43291891	43294599	ATGGAGAAATTGCAAGAAATTGCAGTGTCCTTGGCTGTTGATTATTTGCTTCCACCCTTAAAGAAAGCAGTGAATTCAGTCATGGAGGTTCCAAAAGATGCTGCAGACATGAAAGACAAACTTGATGGGATTCAAGCCATGATTCATGATGTGGACAAGATGGCAGCAACTGAAGAAGGCAACTCACGTGATGGTCTCAAAGCAAAGGTGAAGCTGCTGGTGGAAACATCTTTTTGCATGGAAGATATCGTTGATGAATACATTATCCATGAGGAAAGGCAGCTTGGTGATGTTCCTGGATGTGCATCTTTACCTTGTAAGGCTATTGATTTCGTCAAAACTAGGGCCTCTCGTCTTCAATTTGCATACATGAACCAGGACGTGAAATCAGAATTTCCA…	MEKLQEIAVSLAVDYLLPPLKKAVNSVMEVPKDAADMKDKLDGIQAMIHDVDKMAATEEGNSRDGLKAKVKLLVETSFCMEDIVDEYIIHEERQLGDVPGCASLPCKAIDFVKTRASRLQFAYMNQDVKSEFPGIKERNKSEDCSQIQSSRGNQNITFDNLRMAPLFLKEAEVVGFDSPRDTLERWLIEGREKLTVVSVVGMGGLGKTTLAKKVFDKVQTHFTRHVWITVSQSYTIEGLLLKFLEAKKRKDPSQSVYSTMDKASLISEVRNHLSRNRYVVVFDDVWNENFWEEMKFALVDVENGSRIIITTRYREVAESCRTSSLVQVHELQPLSDDKSFELFCKTAFGSELDGHCPNNLKDISTEIVRKCEGIPLAIVATGGLLSRKSRDAREWQRFS…
HK_NBARC_NBARC.Chr18.49	Chr18	TGFam.PM	48749157	48767546	ATGGACCCAATTACCTCTGTTGCTGCCCAAAGTGCCCTAGAAATTGCAAAACAAGTGGTCAATCGACAAGTGGGTTACATATTTCATTACAAAGACAAATTGAAAGAGGTGGAACAATACATTGAGAGGCTGAATGATACTAGGAAGAGGGTTCAAAATGAAGTTAATTCTGCAGAGAAGAACGGAGAAGAAATTGAAGATGACGTTCAGCATTGGTTAAAAAAGGTGGATGAAAAGATAAAAAAATATGAGTGTTTTATTAATGATGAACGCCATGCACAGACAAGGTGTTCCATTAGATTGATCTTTCCAAATAACTTGTGGTTGAGGTATCGGTTAGGCAGAAATGCTACAAAGATGATAGAGGAAATCAAAGCCGATGGACATTCAAATAAAAGG…	MDPITSVAAQSALEIAKQVVNRQVGYIFHYKDKLKEVEQYIERLNDTRKRVQNEVNSAEKNGEEIEDDVQHWLKKVDEKIKKYECFINDERHAQTRCSIRLIFPNNLWLRYRLGRNATKMIEEIKADGHSNKRFDKVSYRLGPSFDAALSNTGYVSFGSRNEIMKKIMKALEDSTVNIVGVYGAGGVGKTTLVKEVANKAREKKLFNMVVMANVTRIPDIQKIQEQIAEMLGMRLEEESEIVRADRIRKRLKKEKENTLIILDDLWDGLNLNILGIPRSEDDNGSQQDVNDLSDFGYNNMEKEVFSADFNMMKKDKLSVDSNTIKKEKLSGDHKGCKILLTSRSKEVICNKMDVQERSTFSVGVLDENEAKTLLKKEAGIHVQSFEFDEKVIEIAKMCD…
HK_NBARC_NBARC.Chr18.50	Chr18	TGFam.ISGAP	48827955	48857351	ATGGACCCAATTACTTCTGCCACTGTCCAAAGTGCACTGCAAATTGCAGAACATGTGGTCAAACGACAAGTGGGTTACATATTTAATTACAAAGACAAATTTAAAGAGGTGGAACAATACATTGAGAGGCTGGATGATACTAGGAAGAGGGTTCAAAATGAAGTTAATGATGCAGAGAAGAACGGAGAAGAAATTAACTATGAAGTTCAACATTGGTTAAAACAGGTGGATGAGAAGATAAAAAAATATGAGTGTTTTATTAATGATGAACGCCATGCACAGACAAGGTGTTCCATCAGATTGATCTTTCCAAATAACTTGTCATTGAGGTATCGGTTAGGCAGAAAAGCTACAAAGATGGTAGAGGAAATCAAAGCAGATGGACATTCAAATAAAAAG…	MDPITSATVQSALQIAEHVVKRQVGYIFNYKDKFKEVEQYIERLDDTRKRVQNEVNDAEKNGEEINYEVQHWLKQVDEKIKKYECFINDERHAQTRCSIRLIFPNNLSLRYRLGRKATKMVEEIKADGHSNKKFDKVSYRLGPTSDAALLNTGYVSFGSRNETMEKIMKALEDSTVNIVGVYGAGGVGKTTLVKEVANKAREKKLFNMVVMANVTRIPDTEKIQGQIAEMLGMRLEEESEIVRADRIRKRLMKEKESTLIILDDLWDGLNLNILGIPRSEDDDGSQQDVNDLSDFGYHKMEKEVFSADFHTMKKDKLAVDFNAMKKGKLSVDSNMIKKEKLSGDPKGCKILLTSRSKEVICNKMDVQERSTFSVGVLDENEAKSFLKKLAGIHAQSFDF…
HK_NBARC_NBARC.Chr18.51	Chr18	TGFam.ISGAP	48902602	48928697	ATGGTTGGAAATGTATGGACAAAAAAAGGAAAAAGTGGTAGTCATAGCAGGAACCAAACATACAAGAAGAAAGTGTCAATTGTCAAGGGAGAATGGACCCAATTACCTCTGCTGCAGCCCAAAGTACAATGCAAATTGCAGCTAGCTATGGTCAAACGACAATTGGGTTACATATTTAATTACAAAGACAAATTCAAAGAGGTGGAAGAATGCATAGAGATGCTGGATGATAATAGGAAGAAGGTTCAAAATGAAGTTAATGATGCAAAGAAGAACGGGGAAGAAATTGAAGATGGTGTTCAACATTGGTTAAAACAGGTTGATGAGAAGATAAAAAAATATGAGTCTTTTATCAATGATGAACGCCATGCACAGACAAGGTGTTCCTTTAGAGTGATC…	MVGNVWTKKGKSGSHSRNQTYKKKVSIVKGEWTQLPLLQPKVQCKLQLAMVKRQLGYIFNYKDKFKEVEECIEMLDDNRKKVQNEVNDAKKNGEEIEDGVQHWLKQVDEKIKKYESFINDERHAQTRCSFRVIFPNNLWLRYRLGRNATKMVEEIKADGHPNKEFDKVSYRLGPSSDAALLNTGYESFGSRNETIEKIMKALEDSTVNIVGVYGAGGMGKTTLVKEVANKAREKKLFNMVVMANVTRIPDIEKIQGQIAEMLGMRLEEESEIVRADRIRKRLMKEKENTLIILDDLWDGLNLNILGIPRSEDDDGSQQDVNDLSDFGYHKMEKEVFSADFHTMKKDKLAERSTFSVGVLDENEAKSFLKKLAGIHAQSFDFDEKVIEIAKMCDGFPMAL…
HK_NBARC_NBARC.Chr18.52	Chr18	TGFam.ISGAP	48975802	49007088	ATGCAAATTGCAGAACCTATGGTCAAACGACATTTGGGTTACATATTTAATTACAAAGACAAATTTAAAGAGGGGGAACAATACATTGAGAGGATGGATGATAATAGGAAGAGGGTTCAAAATAAAGTTAATGATGCAGAGAAGAACGGAGAAGAAATTGAAGATGATGTTCAACATTGGTTAAAACAGGTTGATGAGAAGATAAAAAAATATGAGTGTTTTATCAATGATAAACGCCATGCACAGACAAGGTGTTCCATTAGAGTGATCTTTCCAAATAACTTGTGGTTGAGGTATCGGTTAGGCAGAAATGCTACAAAGATGGTAGAGGAAATCAAAGCGGATGGACATTCAAATAAAGAGTTTGATAAAGTTTCATATCGGTTGGGCCCATCCTTC…	MQIAEPMVKRHLGYIFNYKDKFKEGEQYIERMDDNRKRVQNKVNDAEKNGEEIEDDVQHWLKQVDEKIKKYECFINDKRHAQTRCSIRVIFPNNLWLRYRLGRNATKMVEEIKADGHSNKEFDKVSYRLGPSFDAALLNTGYVSFGSRNETVEKIMKALEDSTVNTVGVYGAGGVGKTTLVKEVADKAREKKLFNMVVMANVTRIPDIERIQGQIAEMLGMRLEEESEIVRADRIRKRLMKEKESTLIILDDLWDGLNLNILGIPRSEDDDGSQQAVNDVSDFGYNKMEKEVFSADFHTMKKGKLAVDFNTVKKDKLAVDFNTMKKEKLSGDHKGYKILLTSRSKEVICNKMDVQERSTFSVGVLDENEAKTLLKKEAGINVLSFEFDEKVIEIAKMCD…
HK_NBARC_NBARC.Chr18.53	Chr18	TGFam.ISGAP	49084178	49113935	ATGGACCCAATTACTTCTGCCACTGCCCAAAGTGCACTGCAAATTGCAGAACATGTGGTCAAACGACAAGTGGGTTACATATTTAATTACAAAGACAAATTTAAAGAGGTGGAACAATACATTGAGAGGCTGGATGATACTAGGAAGAGGGTTCAAAATGAAGTTAATGATGCAGAGAAGAACGGAGAAGAAATTAACGATGAAGTTCAACATTGGTTAAAACAGGTGGATGAGAAGATAAAAAAATATGAGTGTTTTATTGATGATGAACGCCATGCACAGACAAGGTGTTCCATTAGATTGATCTTTCCAAATAACTTGTCATTGAGGTATCGGTTAGGCAGAAAAGCTACAAAGATAGTAGAGGAAATCAAAGCAGATGGACATTCAAATAAAAAG…	MDPITSATAQSALQIAEHVVKRQVGYIFNYKDKFKEVEQYIERLDDTRKRVQNEVNDAEKNGEEINDEVQHWLKQVDEKIKKYECFIDDERHAQTRCSIRLIFPNNLSLRYRLGRKATKIVEEIKADGHSNKKFDKVSYRLGPSSDAALLNTGYVSFGSRNETMEKIMKALEDSTVNIVGVYGAGGVGKTTLVKEVANKAREKKLFNMVVMANVTRIPDREKIQGQIAEMLGMRLEEESEIVRADRIRKRLMNEKENTLIILDDLWDGLNLNILGIPRSEDDDGSQQDVNDLSDFGYHKMEKEVFSADFHTMKKDKLAVDFNTMKKGKLSVDSNMIKKEKLSGDHKGCKILLTSRSKEVICNKMDVQERSTFSVGVLDENEAKSFLKKLAGIRAQSFEF…
HK_NBARC_NBARC.Chr18.54	Chr18	TGFam.ISGAP	52884337	52888122	ATGGTTGAGGCTGTTGTGTCCTTTGCAGTTGAAAGGCTTCACGACCTACTTACGGAAGAGGCCAGATTGTTAATTGGGGTGAGTGACAAAGTCAAAAGGATGCAAAATGAACTAAAGAGGATGCAATGCTTCCTAAGAGATGCTGAGAGAAAGCAGGATAAAAATGATACTATAAAGAATTATATTTCAGAGGTGAGAAAACTAGCCTATGATGCAGAGGATGTGATAGAAATATATGCTATTAAGGTTGCATTAGGCATAAGTATTGGAACTAAAAATCCACTCACCAAAACTAAACATCTTCACAAAGTTGGCACTGAGCTCACATCAATAAATTCTCGAATTGATGACCTCACAAGAAGCCTACAAAACTATGGTTTTATTGCAACAGAAGACAAT…	MVEAVVSFAVERLHDLLTEEARLLIGVSDKVKRMQNELKRMQCFLRDAERKQDKNDTIKNYISEVRKLAYDAEDVIEIYAIKVALGISIGTKNPLTKTKHLHKVGTELTSINSRIDDLTRSLQNYGFIATEDNEEVSEVQRQLRWSYSHIVEEFIVGLDKDIDKVVEWLLNENHHCQFVYICGMGGLGKTTLAKSIYHYNAIRRNFDGFAWAYISQKCKKRDVWEGILLKLISPTKEERDEIKNMTDDELARKLFKVQQDKKCLIILDDIWSNEAWDMLSPAFPSRNTRSKIVFTSRNKDISLHVDPEGLLHEPSCLNPEDSWALFKKKAFPRQDNPESTVSDEFIRLGREMVAKCAGLPLTIIVLGGLLATKERVSDWATIGGEVREKRKVEEVLDLS…
HK_NBARC_NBARC.Chr18.55	Chr18	TGFam.ISGAP	53644330	53653582	ATGGATCAGGCTAGTAGTAGTAAAAGGAAAAGGGGGGGTCGCCCGAAAAGTAAATACTGGAATGAAGCTGAACAACTAGGAAAAGATACGTGGAAGTGCAACCATTGTAAAGAGAAATTTGGTGGAGGTGCTACAAGGATTGAAGAGCATATTACTGGCAAAGGAAACAATATTAGAAAATGCCCCAAATACCGTGGCAACTTAGGAGGTCACATCATTCTTGCTTCCGGTTCCTCCACCAGTCCACAAGAAGCTCTAAATATATTGAATCAATTACAAGAAGATGAAAATAATTTGGGAGACCAGATACTGGAGCATGATCCGGCTGCATTTGAAAGCAATGACATAGAAAAGGCGTTTTTTTATCCAAAGGGGGACCCTGATGCTGTTTGTATCAGA…	MDQASSSKRKRGGRPKSKYWNEAEQLGKDTWKCNHCKEKFGGGATRIEEHITGKGNNIRKCPKYRGNLGGHIILASGSSTSPQEALNILNQLQEDENNLGDQILEHDPAAFESNDIEKAFFYPKGDPDAVCIRKSDIELLQPQKCLNDNIIDFYIKYLINKLPTDKQDRFHFFNCFFFPKLVDLSTDNPSIASDGKAAFQRVSKLTRKVNLFEKNYIFIPINYSLHWSLIVICHPAEVMTCYRDEETKGSPKEACILHMDSRKGIHQDLHNVFQSYLCEEWKERHNNVRDDVSSIFLDLPFVPLELPQQQNAYDCGIFLLHYVERFLEQAPINFNRSLISKFSYWFPPPDASLKRSHIHKLLIAAEGDNKMIVGGSVNPQNNTQLSALLGGDVEDHAVN…
HK_NBARC_NBARC.Chr18.56	Chr18	TGFam.AUG	53656219	53658835	ATGTACGTTGTGAATGGAAGCAACAATGTTAATAGTGTTCTGGAAAGTGAGATTAGTAACTTAAATCAATTGGTTTCTGATCTAACTTGCGAGGAAGGAGAAGTTACGGAACAATTACAATGGCTGGAGTCTCGGGGCAGGAAGCGCAAGAGGCAAGTTGATATTTGGTTAAATAAAGTACAAGAACTGAAAAGGAGAGCTATTGTCATTAATGACTTACAAGAACTACAGTTTGGGTTGACTGATCTTTATGGATTGGAAATAAGCATTTTCAAGTTGCAACATGACATTGCGGAAACAATAGGGGTTAAACTTAACAGAGATGATGAGAGAACTAGAGCAACAATTTTGTCATTGGCTTTGGAGACAAGAGAAAAAACAGTAATTATTTTGGATGAT…	MYVVNGSNNVNSVLESEISNLNQLVSDLTCEEGEVTEQLQWLESRGRKRKRQVDIWLNKVQELKRRAIVINDLQELQFGLTDLYGLEISIFKLQHDIAETIGVKLNRDDERTRATILSLALETREKTVIILDDVWKYIDLQNVGIPLKVNGIKLIITTRLRHVCLQMDCLPNNIIKIFPFEEEEEAWELFLLKLGHRGTPATLPPHLLEIARSVVMKCNGLPLGISVMARTMKGENDIRRWRHALNNLEKSEMGEEMKEEVLTVLKRSYDNLIEKVMQNCFLFCALLPSIRQEELVMMLVQSGLLNGKRSLEEIFDEGHVIVDKLMDHSLLFDEIEVLRMHGLCFFRHMNALTLLDLSENYGLTSLPKSLSKLRSLTSLVLRECRQLEYIPPLGDLQAL…
HK_NBARC_NBARC.Chr18.57	Chr18	TGFam.ISGAP	53767622	53773003	ATGAATGGGGCTAGTAGCAGTAAAAGAAAAAGAAAAAGGGGAGGTCGGCCCAAAAGTAATTACTGGAATGAAGTTGAAAAAATAGGTGACATGTGGAAGTGCAACCATTGTGAAGGGGAGTTCCATGGAGGTGCTACAAGAATTAAAGAGCATATCATTGGTGGAGGAAAAAATATTAGAAAATGCCCCCACTATCCTGCTTCCGGTTCAATTACACGGAATCAATTACAAGAAGATGTGGAGCATGATTCTGCTGCATTTAAAAGCAATGACATGGAAAAGGCAATTTGTTATCCAAAGGGGGACCCTGATGCTATTTACATCAGGAAGAGCGATATTGAGCTTTTACAGCCTGAGAAATGCCTTAATGATAATATCATTGACTTTTATATAAAGTAT…	MNGASSSKRKRKRGGRPKSNYWNEVEKIGDMWKCNHCEGEFHGGATRIKEHIIGGGKNIRKCPHYPASGSITRNQLQEDVEHDSAAFKSNDMEKAICYPKGDPDAIYIRKSDIELLQPEKCLNDNIIDFYIKYLINNKLPSDKQKRFHFFNCFFFPKLVDLSTDNRSIACDGKAAFQRVSNWTRKVNLFEKDYIFIPINYSLHWSLIVICHPAEVMTCYRDEETKGSPKEACILHMDSRKGIHQDLHNVFQSYLCEEWKERHNNVRDDASSKFLDLPFVPLELPQQQNAYDCGIFLLHYVERFLEKAPINFNRSLITNFSSWFPPLDASLKRSHIQKLLIVEGGNKMIDGDSVNSQNNTKLSASAGGDVEDHAVNGGSNGDDALTINKLLSDLARQEDY…
HK_NBARC_NBARC.Chr18.58	Chr18	TGFam.AUG	53775641	53785230	ATGGATGGGGCTTGTGGTAGTAAAAGAAAGAGGGGAGGTAGACCGAAAAGTAAATACTGGAATGAAGCTGGAAAGATAGGAAAAGATATGTGGAAGTGCAACCACTGTAAAGAGAAGTTTAGTGGAGGTGCTACAAGGATTGAAGAACATATCACTGGCAAAGGAAATAGTATCAGAAAATGCTCCAAGTATCCTGGTCATGAAGGAGGTCACAACATCATTGCTTCCGGTTCAACCAGTCCACGAGAAGCACTACATACATTGAATCAATTACGAGAAGATGAAATTAACTTGGGAGACCAGATAGTGGAGCATGATTCTGCTGCATTTGAAAAGGCGTTTTTTTATCCAAAGGGGGACCCTGATGCTGTTTGTATCAGAAATAGCGATATTGAGCTT…	MDGACGSKRKRGGRPKSKYWNEAGKIGKDMWKCNHCKEKFSGGATRIEEHITGKGNSIRKCSKYPGHEGGHNIIASGSTSPREALHTLNQLREDEINLGDQIVEHDSAAFEKAFFYPKGDPDAVCIRNSDIELLQPEKCLNDNIIDFYINYLKNKLPTDKQDRFHFFNCFFFPKLVDLSTDNPSIASDGKAAFQRVSKLTRKVNLFEKDYIFIPINYSLHWSLIVICHPAEVMTCYRDEETKGSPKEACILHMDSRKGIHQDLHNVFQSYLCEEWKERHNNVRDDDVSSIFLHLPFVPLELPQQQNAYDCGIFLLHYVERFLEQAPINFNRSMISKFSYWFPPPDAPLKRSHIQKLLIAAEGDNKMIVGGSVNPQNSTKLSAALLGGDVEDHTVNGGSN…
HK_NBARC_NBARC.Chr18.59	Chr18	TGFam.ISGAP	53795418	53798775	ATGATTGTTGGTGGTTCAGTTAACCCTCAAAACAATACACAATTCTCAGCTGCTTTATTAGGAGGTGATGTAGAAGATCATGCTGTGAACGGAGGTAGCAATGGCGATGATGCTTTGACTATAAATAATTTGCTATCCGATCTAGCAAGGGAAGAAGACTACTTTGATAAAGAATTACAGTGGCGGGAGTTCCAGGCCATTAAGCGCAAGAGACAAGATGACGATTGGTCGGATAAACTAAAGGACCTGAAAAAAAGAGTTATTGATGTGAAAAACTCACTGCATCAGTCTGGGTCGACTAATGAATTGCCCAAGCCTTCTGAATTGCATGCTAAGTTTATTTATTTATTGATAGAGAAGCTTTGGGAGTTGCGAGATGAAAATGAAGTCTTCATTATT…	MIVGGSVNPQNNTQFSAALLGGDVEDHAVNGGSNGDDALTINNLLSDLAREEDYFDKELQWREFQAIKRKRQDDDWSDKLKDLKKRVIDVKNSLHQSGSTNELPKPSELHAKFIYLLIEKLWELRDENEVFIIGIDGMGGVGKTFMATHFKNEIKRKGTFKDVFWVTVSHDFTIFKLQHHIAETMQVKLYGDEMTRATILTSELEKREKTLLILDDVWEYIDLQKVGIPLKVNGIKLIITTRLKHVWLQMDCLPNNTITIFPFDELEEEAWELFLLKLGHRGTPARLPPHVLEIARSVVMKCDGLPLGISAMARTMKGKNEIHWWRHALNKLDRLEMGEEVLSVLKRSYDNLIEKDIQKCFLQSALFPNHIFKEEWVMMLVESGLLDGKRSLEETFDEG…
HK_NBARC_NBARC.Chr18.60	Chr18	TGFam.ISGAP	53930341	53932917	ATGGTTGACAGTGTTGTTACTTTTCTGCTAGATAACTTGTCTCGCCTGCTTGAAGATGAGCACAAGTTGCTTTCTGGCGTGGAGGACAAAATCAACTCTCTTTGCAATGAGCTCAAGTTTATACACATCTTCCTCAAGAATTCTGAGGGTAAGCGCAGTCATGAGATGGTGAAAGAAGTGGTGAGCCAAATCAGAGATGTCGCCCACAAAGCTGAAGATGTTGTTGACACCTACGTTGCCAACATCGCCCAACAAAAACAGAGAAGCAAACTGAGCAAGTTATTCCACCTCAAAGAACATGTCATGGTGCTTCACCAAGTCAACTCTGACATAGAGAAGATCAGGACTCGGATCGATGAGATCTATAAGAACAGGGACAGATATGGCATTGGAGAAGGT…	MVDSVVTFLLDNLSRLLEDEHKLLSGVEDKINSLCNELKFIHIFLKNSEGKRSHEMVKEVVSQIRDVAHKAEDVVDTYVANIAQQKQRSKLSKLFHLKEHVMVLHQVNSDIEKIRTRIDEIYKNRDRYGIGEGEFRSEEAAAEAEPLLKRRREVEEEDVVGLVHDSSHVIQELMESESRLKVVSIIGMGGLGKTTLARKIYNNNQVQLWFPCLAWVSVSNDYRPKEFLLSLLKFSTSSTSEFEELSEAELKKKVAEWLKGKKYLVVLDDIWKTQVWDEVKEAFPDDQTGSRILITSRNKEVAHYAGTASPYYLPILNEDESWELFTKKIFRGEECPSDLEPLGRSIVKTCGGLPLAIVVLAGLVAKKEKSQREWSRIKDVSWHLTEDKTGVMDILKLSY…
HK_NBARC_NBARC.Chr18.61	Chr18	TGFam.ISGAP	53936845	53939427	ATGGCTGATAGTGTTGTTGTTTTTCTACTAGATAACTTGTCTCGGCTGCTTGAAGATGAGCACAAGTTGCTTTCTGGCGTGGAGGACAAAATCAACTCTCTTTGCAATGAGCTCAAGTTTATACACATCTTCCTCAAGAATTCTGAGGGCAAGCGCAGTCACGAGATGGTGAAAGAAGTGGTGAGCCAGATCAGAGATGTCGCCCTCAAAGCTCAAGATGTGGTTGACACCTACCTTTCCAACATCGCCCCACAAAAACAGAGGAGCAAACTGAGCAAGTTATTCCACCTCAAAGAACATGTCATGGTGCTTCACCAAGTCAACTCTGACATAGAGAAGATCAGGAGTCGGATCGATGAGATCTATAAGAACAGGGACAGATATGGCATTGGAGAAAGT…	MADSVVVFLLDNLSRLLEDEHKLLSGVEDKINSLCNELKFIHIFLKNSEGKRSHEMVKEVVSQIRDVALKAQDVVDTYLSNIAPQKQRSKLSKLFHLKEHVMVLHQVNSDIEKIRSRIDEIYKNRDRYGIGESEFRSEEAAAEAESLLKRRREVEEEDVVGLVHDSSHVIHELMESESRLKVVSIIGMGGLGKTTLARKIYNNNQVQLRFPCLAWVSVSNDYRRKECLLSLLKCSMPSTSEFEELSEEDLKKKVAEWLKGKKYLLVLDDIWEAKVWDEVKGAFPDDQTGSRILITSRNKEVAHYAGTASPYYLPILNEDESWELFTKKIFRGEECPSDLEPLGRSIVKTCGGLPLAIVVLAGLVAKKEKSQREWSRIKEVSWHLTEDKTGVMDILKLSY…
HK_NBARC_NBARC.Chr18.62	Chr18	TGFam.ISGAP	53945634	53948231	ATGGTTGATAGTGTTGTTACTTTTCTGCTACATAACTTGTCTCGGCTCCTTGAAGATGAGCACAAGTTGCTTTCTGGCGTGGAGGACAAAATCAATTCTCTGCGCAATGAGCTCGAGTTTATGCACGCCTTCCTCATGGATTCCGAGGGCAAGCGCAGTAATGAGATAGTGAAAAAAGTGGTGAGCCAAATCAGAGATGTCGCCCACAAAGCTGAAGATGTTGTTGACACCTACGTTGCCAACATCGCCCAACAAAAACAGAGAAGAAAACTGAGGGAGTTTTTCCACCTCAAAGAACATGTCTTGGTGCTTCACCAAGTCAACTCTGAGATAGAGAAGATCAGGAGTCGGATCGATGAGATCTTTGAGAACAGGGACAGATATGGCATTGGAGAAGGT…	MVDSVVTFLLHNLSRLLEDEHKLLSGVEDKINSLRNELEFMHAFLMDSEGKRSNEIVKKVVSQIRDVAHKAEDVVDTYVANIAQQKQRRKLREFFHLKEHVLVLHQVNSEIEKIRSRIDEIFENRDRYGIGEGDFRSEEAAAEAESLLKRRREVEEEDVVGLLHDSSNVIQELMESESRRKVVSIIGMGGLGKTTLARKIYNNNQVQRRFPCLAWVSVSNDYRPKECLLSLLKCSTSSTSEFEKLSEEELKKKVAEWLKGKSYLVVLDDIWETKVWDEVKGAFPDDQTGSRILITSRNKDVAHYAGTASPYDLPILNEDESWELFTKKIFRGEECPSDLEPLGRSIVKICGGLPLAIVVLAGLVAKKEKSQREWSRIKDVSWNLTEDKTGVMDILKLSY…
HK_NBARC_NBARC.Chr18.63	Chr18	TGFam.ISGAP	53960583	53963561	ATGGCTGATAGTGTTGTTGTTTTGCTGCTAGATTACTTGTCTCGGCGACTTGAAGATGAGCACAAGTTGCTTTCTGGCGTGGAGGACAAAATCAACTCTCTTTGCAATGAGCTCAAGTTTATATACATCTTCCTCAAGAATTCCGAGGGCAAGCGCAGTCATGACACAGTGAAAAAAGTGGTGCGCCAAATCAGAGATGTCGCCCACAGTGCCGCAGATGTGGTTGACGCCTACGTTGCCAACATCGCCCAACAAAAACAGAGAAGCAAACTGAGCAAGTTATTCATGGGGCTTCACCAAGTCAACTCTGACATAGAGAAGATCAGGAGTGGGATCGATGAGATCTATAAGAACAGGGACAGATATGGCATTGGAGAAGGTGAATTCCGAAGCCAAGAA…	MADSVVVLLLDYLSRRLEDEHKLLSGVEDKINSLCNELKFIYIFLKNSEGKRSHDTVKKVVRQIRDVAHSAADVVDAYVANIAQQKQRSKLSKLFMGLHQVNSDIEKIRSGIDEIYKNRDRYGIGEGEFRSQEAAAEAESLLKRRREVEEEDVIQKLMESESRLKVVSIIGMGGLGKTTLARKIYNNNQVQLLFSCRAWVSVSNDYRPREFLLSLLKCSMSSISEFEKLSEEELKKKVAEWLKWKKYLVVLDDIWETQVWDEVKGAFPDDHTASRILITSRNKRVAHYAGTASPYDLPILNEDESWELFTKKIFRGEECPSDLEPLGRSIVKTCGGLPLAIVVLAGLVAKKEKSHREWSTIKKVSRHITENKNGVMDILKLSYNNLPRRLKPCFLYFGI…
HK_NBARC_NBARC.Chr18.64	Chr18	TGFam.ISGAP	54003681	54006478	ATGGTTGATAGTGTTGTTACTTTTCTGCTAGATAACTTGTCTCGGCTGCTTGAAGATGAGCACAAGTTACTTTCTGGCGTGGAGGACAAAATCAATTCTCTGCGCAATGAGCTCGAGTTTATGCACGCCTTCCTCATGGATTCCGAGGGCAAGCGCAGTAATGAGATAGTGAAAAAAGTGGTGAGCCAAATCAGAGATGTCGCCCACAAAGCTGAAGATGTGGTTGAGACCTACGTTGCCAACATCACCAAGCACAGACAGAGAAACATATTTAGCAAGTTATTCCACTTTGAAGAACAATTCATGGTGCTTCACCAAGTCAACTCTGAGATAGAGAAGATCAGGAGTCGGATCGATGAGATCTATAAGAACAGGGACAGATATGACATTGTAGAAGGT…	MVDSVVTFLLDNLSRLLEDEHKLLSGVEDKINSLRNELEFMHAFLMDSEGKRSNEIVKKVVSQIRDVAHKAEDVVETYVANITKHRQRNIFSKLFHFEEQFMVLHQVNSEIEKIRSRIDEIYKNRDRYDIVEGDFRSEEAALEAESLRKRRTDVEEEDVVGLVHDSSHVIDQLMVSESRLKVVSIIGMGGLGKTTLARKIYNNKQVKVRFPCLVWVSVSNDYRPKEFLLSFLKCLMSSTSKFEKLSEEKLKKKVAKRLKGKKYLVVLDDIWETQVWDEVKGAFPDEHKGSRILITSRNSVVAHYAGTASPYYLPILNEDESWELFTKKIFRGEECPSDLEPRGRTIVKTCGGLPLAIVVLAGLVAKKEKSPREWSRMEVSWHLTEDKTGVMDILKLSYN…
HK_NBARC_NBARC.Chr18.65	Chr18	TGFam.ISGAP	54024105	54026714	ATGGTTGACAGTGTTGTTACTTTTCTGCTAGATAACTTGTCTCGCCTGCTTGAAGATGAGCACAAGTTGCTTTCTGGCGTGGAGGACAAAATCAACTCTCTTTGCAATGAGCTCAAGTTTATACACATCTTCCTCAAGAATTCTGAGGGTAAGCGCAGTCATGAGATGGTGAAAGAAGTGGTGAGCCAAATCAGAGATGTCGCCCACAAAGCTGAAGATGTTGTTGACACCTACGTTGCCAACATCGCCCAACAAAAACAGAGAAGCAAACTGAGCAAGTTATTCCACCTCAAAGAACATGTCATGGTGCTTCACCAAGTCAACTCTGACATAGAGAAGATCAGGACTCGGATCGATGAGATCTATAAGAACAGGGACAGATATGGCATTGGAGAAGGT…	MVDSVVTFLLDNLSRLLEDEHKLLSGVEDKINSLCNELKFIHIFLKNSEGKRSHEMVKEVVSQIRDVAHKAEDVVDTYVANIAQQKQRSKLSKLFHLKEHVMVLHQVNSDIEKIRTRIDEIYKNRDRYGIGEGDFRSEEAAAEAEPLLKRRREVEEEDVVGLVHDSSHVIQELMESESRLKVVSIIGMGGLGKTTLARKIYNNNQEQLWFPCLAWVSVSNDYRPKEFLLSLLKCSMSSTSEFEELSEAELKKKVAEWLKGKKYLVVLDDIWETQVWDEVKGAFPDDQTGSRILITSRNKEVAHYAGTASPYYLPILNEDESWELFTKKIFRGEECPSDLEPLGRSIVKTCGGLPLAIVVLAGLVAKKEKSQREWSRIKDVSWHLTEDKTGVMDILKLSY…
HK_NBARC_NBARC.Chr18.66	Chr18	TGFam.ISGAP	54033838	54036540	ATGCGCGCCTTTTCCTATATTGGCGTCCACTTGTTATCTTTCGTTGTCTACTCCGTATGCTATCTATCCACAAACTCTCTAGAGTTTCCACCCAAGATTTCCTGTTTCACAGAAATGGCTGATAGTGTTGTTGTTTTTCTACTAGATAACTTGTCTCGGCTGCTTGAAGATGAGCACAAGTTGCTTTCTGGCGTGGAGGACAAAATCAACTCTCTTTGCAATGAGCTCAAGTTTATACACATCTTCCTCAAGAATTCTGAGGGCAAGCGCAGTCACGAGATGGTGAAAGAAGTGGTGAGCCAGATCAGAGATGTCACCCTCAAAGCTGAAGATGTGGTTGACACCTACCTTTCCAACATCGCCCAACAAAAACAGAGAAGCAAACTGAGCAAGTTATTC…	MRAFSYIGVHLLSFVVYSVCYLSTNSLEFPPKISCFTEMADSVVVFLLDNLSRLLEDEHKLLSGVEDKINSLCNELKFIHIFLKNSEGKRSHEMVKEVVSQIRDVTLKAEDVVDTYLSNIAQQKQRSKLSKLFHLKEHVMVLHQVNSDIEKIRTRIDEIYKNRDRYGIGEGDFRSEEAAAEAEPLLKRRREVEEEDVELMESESRLKVVSIIGMGGLGKTTLARKIYNNNQVQLWFPCLAWVSVSNDYRPKEFLLSLLKCSMSSTSEFEELSEEELKKKVAEWLKGKKYLVVLDDIWETQVWDEVKGAFPDDQSGSRILITSRNKEVAHYAGTASPYYLPILNEDESWELFKKKIFGLEECPSDLEPLGRSIVKTCGGLPLAIVVLAGLVAKKEKSQRE…
HK_NBARC_NBARC.Chr18.67	Chr18	TGFam.ISGAP	54045072	54047693	ATGACAGATAGTGTTGTTGCTTTTGTGCTAGATAACTTGTCGCTGCTTGAAGATGAGCACAAGTTGCTTTCTGGCGTGGAGGACAAAGTCAACTCTCTTTGCAATGAGCTCAAGTTTATACACATCTTCCTCAAGAATTCCGAGGGCAAGCGCAGTCATGACACAGGGAAAGAAGTGGTGAGCCAAATCAGAGATGTCGCCCACAAAGCTGAAAATGTTGTTGACACCTACGTTGCCAACATCGCTCAACAAAAACAGAGAAGCAAACTGAGCAAGTTATTCCACCTCAAAGAACATGTCATGGTGCTTCACCAAGTCAACTCTGAGATAGAGAAGATCAGGAGTCAGATCGAAGAGATCTATAAGAACGGGGACAGATATGGCATTGGAGAAGGTGAA…	MTDSVVAFVLDNLSLLEDEHKLLSGVEDKVNSLCNELKFIHIFLKNSEGKRSHDTGKEVVSQIRDVAHKAENVVDTYVANIAQQKQRSKLSKLFHLKEHVMVLHQVNSEIEKIRSQIEEIYKNGDRYGIGEGEFRSEEAAAEAESLLKRRREVEEEDIVGLVHDSSHVIHELMESESRLKVVSIIGMGGLGKTTLARKIYNNNQVQLRFPCLAWVSVSNDYRPKECLLSLLKCSMSSTSEFEKLSEEDLKKKVAEWLKGKSYLVVLDDIWETKVWDEVKGAFPDDQIGSRILITSRNKEVAHYAGTASPYDLPILNEDESWELFTKKIFRGEECPSDLEPLGRSIVKICGGLPLAIVVLAGLVAKKEKSQREWSRMEVSWHLTEDKTGVMDILKLSYNN…
HK_NBARC_NBARC.Chr18.68	Chr18	TGFam.ISGAP	54346965	54349655	ATGGCGGATGCAATTGTGAACTTCTTGGCAGAGAAGTTGACGAGGCTGCTTGAGGAGGAAGCCAAGCTTCTCACCGAGGTGCATGACAACGTGACCTCGTTGCACGACCAGCTTAAGATATTGAACCTCTTCCTCAAAGAGACCCAAGGGACCAAGCAGAGAGAGCACGGACTGGTGGCGGAAATGGTCGGCCAAATCAGAGACGCTGCATACCAAGCCGAAGACATCATCGACACCTATGTGGCGGACATGATTCGACGTCGAAAGATGAACCGGTTGGAGAAGGTGGTCATCGGCAGTGTCAACCACGCGCTCATGCTTCACAAAGTGGCGGTCAAGATAGGCGACATCAAGACAAGAATCGACAATAGGTTCGGCAACATAGAAAAATACGGCGTC…	MADAIVNFLAEKLTRLLEEEAKLLTEVHDNVTSLHDQLKILNLFLKETQGTKQREHGLVAEMVGQIRDAAYQAEDIIDTYVADMIRRRKMNRLEKVVIGSVNHALMLHKVAVKIGDIKTRIDNRFGNIEKYGVRLISAKGEKSNGEEEETERVRKQRSEVEEDKVAGFESYSRAVIEKLTARVRDRDSRLNVVSITGVGGLGKTTLARKTYNNVRVKDTFSCRAWGYVSNDYRPREFFLSLLKCLQPGEYSDMSERRESDEELKMKVRECLNKSGKYLVVVDDVWETQVWDEIKSAFPDANNGSRILITSRSTKVASYAGTTPPYSLPFLNKQKSWELLFKKLFKGRRKCPPELVELGKSIAERCDGLPLAIIFMAGILANKELHKEWSDIKDHMDWHL…
HK_NBARC_NBARC.Chr18.69	Chr18	TGFam.ISGAP	54350516	54353406	ATGGCGGATACAATTGTGGTTTTCCTGATAGAAAAGTTGACGAGGTTGTTAGCAGAAGAAGCCAAACTACTTGGTAGCGCGCACGACAAAGTAACATCGTTGCGCAACGAGCTGAGGTTCATGAACCTCTTCCTCAACAACTCCCAAGGCAAGCGCAAAGATCACAACATGGTCGCGGAACTCGTTGACCAAATCAGAGACATCGCCCACGAAGCCGAAGACGTCATCGACAACTACATCAGCGACATGATCAAGCAGAGAAGGAGAAACATGCTGGAGAAGTTTGGCCGCGGCGTAGACCACGCGCTCATGCTTCGCAACTTGACCGTCAAAATAGACAGGATCAAGACCACCATCAACGATATCTTCGACAATAAGGTCAAGTACGGCATCGAAGCT…	MADTIVVFLIEKLTRLLAEEAKLLGSAHDKVTSLRNELRFMNLFLNNSQGKRKDHNMVAELVDQIRDIAHEAEDVIDNYISDMIKQRRRNMLEKFGRGVDHALMLRNLTVKIDRIKTTINDIFDNKVKYGIEAGRRDSEEEAERIRKQRRDVEEQEVVGFAHDSKVVIEKLMASGSRLKLVSIVGMGGLGKTTLARKIYNSNRVKNTFPCRAWGYASNDYRPREFFLSLLKCLLSTSKYNDLFKKREEASRSEEELKMKVRECLSRSCGKYLVVVDDVWQSQVWDEVKGAFPDDSNGSRILITTRHAEVASHAGPMPPYFLPFLTEEESWELLSKKVFRGEDCPSDLEPMGKLIAESCNGLPLAIIVMAGILANKKSLRDWSRIKDHVNWHLGRDTTLK…
HK_NBARC_NBARC.Chr19.1	Chr19	TGFam.ISGAP	2542340	2545856	ATGGCTGCAATATCATGTTCCTATGTATTCACCTATGATGTGTTCCTTAGCTTCAGAGGCTCAGACACACGCCATGGTTTTGTTGGCAATCTCTACAAAGCTCTTAATGACAAGGGAATCCACACTTTCATTGATGATGAGAAGCTTCAGGGAGGAGAGGAAATAACACCAACACTTATGAAAGCAATTGAGGAGTCCCAGATTGCCATCACTGTGCTCTCTCACAACTATGCTTCTTCCTCATTTTGTTTGGATGAACTTGTTCACATCATTGATTGTAAGAGGAAAGGTTTGCTGGTTTTGCCGGTTTTTTATAACTTGGATCCTTCTGATGTGAGACACCAGAAAGGTAGTTATGGAGAAGCATTGGCTAGGCATGAGGAAAGGTTCAAAGCTAAG…	MAAISCSYVFTYDVFLSFRGSDTRHGFVGNLYKALNDKGIHTFIDDEKLQGGEEITPTLMKAIEESQIAITVLSHNYASSSFCLDELVHIIDCKRKGLLVLPVFYNLDPSDVRHQKGSYGEALARHEERFKAKKERLNQNMERLEKWKMALHQVANLSGYHFKQGDGYEYEFIGKIVEMVSGKTNRALLHIADYPVGLESQVLEVVKLLDVGANDGVHMIGIHGIGGIGKTTLALAVYNYVADHFDGSCFLENVRENSDKHGLQHLQSIILSELVKENKMNIATVKQGISMIQHRLQRKKVLLIVDDVDKPEQLQAIVGRPDWFGSGSRIIITTRDEKLLASHEVRRTYEVNELNRNDALQLLTWEAFKMQKVDPSYEEMLNRVVTYASGLPLALKVIG…
HK_NBARC_NBARC.Chr19.2	Chr19	TGFam.AUG	6220517	6224426	ATGGCAGTGTTGAACATCGAGCTGCTGCAGATAGCTCGGGAAGCATTGCTAAGAGATGTAGCTCATGAGCTGGATGACATCATGGACGAGTGTGCCTATGAAAAACCAGGGCTGGAGTTCCAAGGAATCAAGTTCAAACCAGTCTATGGAAGAGAAAAAGAAAAGAATAAAATTGTAGACTTTTTGGTCGGTAATGCTTCTCATGCTGAGGATTTATTAGTCTATCCAATCATAGGACAAGGCGGACTTGGAAAAACAACACTGGCCCAACTCGCCTTCAATCGCGAGAGGGTAGCAAAACACTTTGAGCTAAGAATTTGGGTATGCGTTTCAGAAGATTTTAGTTTGAAGAGAATGACAAAAGCTATCATCGAAGCAGCATCTGGATGTGCTTGTGAT…	MAVLNIELLQIAREALLRDVAHELDDIMDECAYEKPGLEFQGIKFKPVYGREKEKNKIVDFLVGNASHAEDLLVYPIIGQGGLGKTTLAQLAFNRERVAKHFELRIWVCVSEDFSLKRMTKAIIEAASGCACDDLDLEPLQKKLQDLLQRKRYFLILDDVWNDEQENWQRLKSVLACGAKGASILVTTHLSSVATIMGTTPPHELSMMPKKNCWELFKHRAFGPDEVMQVELEVIGKEIVKKCGGVPLAAKALGSLLCFERKEEAWLNVKENNLWSSSHDIMPALSLSYLNLPIKLRQYGKLDVEDVGDSVWHELHWRSFFQDLETDELGKVTSFKLHDLAQFVAKEICCVTKDNDVTTFSERIHHLLEHRWQTNVIQILEVKSLRSCIMLYDRRGCSF…
HK_NBARC_NBARC.Chr19.3	Chr19	TGFam.PM	9080608	9091502	ATGCAATCATCCTCATCTTCCTTTAGTTACAGATTCAGCAACGATGTGTTCCTCAGCTTCCGAGGGGAAGATACTCGTCACAGTTTTACCGGCAATCTCTATAAAGCTCTCTCTGACAGAGGAATTCACACCTTCATCGATGACAAGAAGCTCCCTAGAGGAGACCAAATCAGCTCAGCACTTGAGAAGGCAATTGAAGAGTCCAGAATATTCATCATCGTGCTCTCTGAAAACTATGCATCGTCCTCCTTCTGCTTAAATGAACTTGGTTACATCCTTAAGTTTATTAAGGGGAAGGGCCTATTGGTTTTGCCTGTTTTTTATAAGGTTGATCCTTCTGATGTGAGAAACCATGCAGGTAGTTTTGGAGAGTCATTGGCTCATCATGAAAAGAAGTTC…	MQSSSSSFSYRFSNDVFLSFRGEDTRHSFTGNLYKALSDRGIHTFIDDKKLPRGDQISSALEKAIEESRIFIIVLSENYASSSFCLNELGYILKFIKGKGLLVLPVFYKVDPSDVRNHAGSFGESLAHHEKKFNADKETFKCNLVKLETWKMALHQVANLSGYHFKHGEEYEYKFIQRIVELVSKKINRVPLHVADYPVGLESRMQEVKALLDVGSDDVVHMLGIHGLGGVGKTTLAAAVYNSIADHFEALCFLENVRETSKKHGLQHLQSNLLSETVGEHKLIGVKQGISIIQHRLQQQKILLILDDVDKREQLQALAGRPDLFGLGSRVIITTRDKQLLACHGVERTYEVNELNEEHALELLSWKAFKLEKVDPFYKDVLNRAATYASGLPLALEVI…
HK_NBARC_NBARC.Chr19.4	Chr19	TGFam.AUG	9100006	9104140	ATGGCTATGCAATCATCCTCATCTTCCTTTAGTTACAGATTCAGCAACGATTTGTTCCTCAGCTTCCGAGGGGAAGATACTCGTCGCAGTTTTACCGGCAATCTCTATAAAGCTCTCTCTGACAGTGGAATTCACACCTTCATGGATGACAAGAAGATCCCTAGAGGGGACCAAATCACCTCAGGACTTGAGAAGGCAATTGAAGAGTCCAGAATATTCATCATCGTGCTCTCTGAAAACTATGCATCGTCCTCCTTCTGCTTAAACGAACTTGATTACATCCTTAAGTTTATTAAGGGAAAGGGCCTATTGGTTTTGCCAGTTTTTTATAAGGTTGATCCTTCTGATGTGAGAAACCACACAGGTAGTTTTGGAGAGTCATTGGCTAATCATGAAAAG…	MAMQSSSSSFSYRFSNDLFLSFRGEDTRRSFTGNLYKALSDSGIHTFMDDKKIPRGDQITSGLEKAIEESRIFIIVLSENYASSSFCLNELDYILKFIKGKGLLVLPVFYKVDPSDVRNHTGSFGESLANHEKNGAGSGTGSGRVLRIPSPTPNPNLAIGENPTSTPTPINSNFPHQNRGGSGADPTGSGPVAMPNADKETFKCNLVKLETWKMALHQVANLSGYHFKHGEEYEYKFIQRIVELVSKKINRAPLHVADYPVGLESRMQEVKELLDVGSDDVIHMLGIHGLGGVGKTTLAAAVYNSIVDHFEALCFLENGTSQIEIICMNFSSFEEVEIVWGGDALKKMKNLKTLIIRSGYFSKGPKHFPNSLRKFVNLTSLSFDSSQHLTQMPDVSCIP…
HK_NBARC_NBARC.Chr19.5	Chr19	TGFam.AUG	9116263	9117297	ATGGAATACGAATATGGGTTTATTCAAAGGATTGTTGAGTTGGTCTCTAAGAAGATTAATTGTTCTCCTTTACATGTTGCGGATTATACAGATGGACTAGAGTCACAAATGCAAGAAGTTAAAGTGCTTCTGGATGTTGGATCTGATGATGTCGTCCACATGCTAGGGATACATAGGCTGGGTGGAGTAGGTAAAATGACAATTTCTACTGCAGTTTATAATTCCATTGCTGACCATTTTGAAGCTTTGTGTTTCCTTGAAAACGTGAGAGAAACTTCAAAAAAACATGGGTTAGAACATCTCCAAAGCAACCTTCTTTCTGACACAATTGCAGAGGATAAGTTAATAGGTGTCAAGCAAGGAATTTCCATAATACAGCATAAGCTTCAGCAACAGAAG…	MEYEYGFIQRIVELVSKKINCSPLHVADYTDGLESQMQEVKVLLDVGSDDVVHMLGIHRLGGVGKMTISTAVYNSIADHFEALCFLENVRETSKKHGLEHLQSNLLSDTIAEDKLIGVKQGISIIQHKLQQQKILLILDDVDKRE*
HK_NBARC_NBARC.Chr19.6	Chr19	TGFam.PM	9118768	9123143	ATGGCTAAGCAATCATCCTCATCTTCCTTTAGTTACAGATTCAGCAACGATGTGTTCCTCAGCTTCCGAGGGGAAGATACTCGTCGCGGTTTTACTGGCAATCTCTATAAAGCTCTCTCTGACAGGGGAATTCACACCTTCATGGATGACAAGAAGATCCCTAGAGGAGACCAAATCACCTCAGGACTTGAGAAGGCAATTGAAGAGTCCAGAATATTCATCATCGTGCTCTCTGAAAACTATGCATCGTCCTCCTTCTGCTTAAACGAACTTGATTACATCCTTAAGTTTATTAAGGGGAAGGGCATATTGATTTTGCCAGTTTTTTATAAGGTTGACCCTTCTGATGTGAGAAACCACACTGGTAGTTTTGGAAAGGCGTTGACTAATCATGAAAAG…	MAKQSSSSSFSYRFSNDVFLSFRGEDTRRGFTGNLYKALSDRGIHTFMDDKKIPRGDQITSGLEKAIEESRIFIIVLSENYASSSFCLNELDYILKFIKGKGILILPVFYKVDPSDVRNHTGSFGKALTNHEKKFKSTNDMEKLETWKMALNKVANLSGYHHFKHGEEYEYEFIQRIVELVSKKINRAPLHVADYPVGLESRIQEVKALLDVGSDDVVHMLGIHGLGGVGKTTLAAAVYNSIADHFEALCFLQNVRETSKKHGLQHLQRNLLSEMAGEDKLIGVKQGISIIEHRLRQKKVLLILDDVDKREQLQALAGRPDLFGPGSRVIITTRDKQLLACHGVERTYEVNELNEEYALELLNWKAFKLEKVDPFYKDVLNRAATYASGLPLALEVIGS…
HK_NBARC_NBARC.Chr19.7	Chr19	TGFam.ISGAP	9160635	9165016	ATGGCTAGGCAATCATCCTCATCTTCCTTTAGTTACAGATTCACCAACGATGTGTTCCTCAGCTTCCGAGGGAAAGATACTCGTCACAGTTTTACCGGCAATCTCTATAAAGCACTCTCTGAAAGAGGAATTAACACCTTCATCGATGACAAGAAGCTCCCTAGAGGGGACGAAATCACGTCAGCACTTGAGAAGGCAATTGAAGAGTCCAGAATATTCATCATCGTGCTCTCTGAAAACTATGCATGGTCCTCCTTCTGCTTAAACGAACTTGATTACATCCTTAAGTTTATTAAGGGGAAGGGCCTATTGGTTTTGCCAGTTTTTTATAAGGTTGATCCTTCTGATGTGAGAAACCACACAGGTAGTTTTGGAGAGTCATTGGCTTATCATGAAAAG…	MARQSSSSSFSYRFTNDVFLSFRGKDTRHSFTGNLYKALSERGINTFIDDKKLPRGDEITSALEKAIEESRIFIIVLSENYAWSSFCLNELDYILKFIKGKGLLVLPVFYKVDPSDVRNHTGSFGESLAYHEKKFKSTNNMEKLETWKMALNQVANLSGYHHFKHGEEYEYQFIQRIVELVSKRINRAPLHVADYPVGLESRIQEVKMLLDVGSDDVVHMVGIHGLGGIGKTTLAAAIYNSIADHFEALCFLENVRETSKTHGLQYLQRNLLSKTVGEDELIGVKQGISIIQHRLQQKKALVGRPDLFCPGSRVIITTRDKQLLACHGVKRTYEVNELNEEYALQLLSWKAFKLEKVNPCYKDVLNRAVTYSAGLPLALEVIGSNLSGRNIEQWRSTLD…
HK_NBARC_NBARC.Chr19.8	Chr19	TGFam.ISGAP	23603803	23606409	ATGGCTGAATCATTTCTCTTCAGCATCGCTGAGTCTCTCATAACAAAGCTTGCTTCTCATGCTTTCCAAGAAGCTTCTCGGGTGGTGGGTTTGTACGACCATCTCCGAGACCTTAAAAAGACTCTCTCATTAGTCAAGGCAGTGCTGTTAGATGCCGATCAAAAGCAGGAGCATAACCATGAGCTGCAGGAATGGCTGAGGCAGCTCAAAAGTGTCTTCTATGATGCCGAAGATGTGTTGAATGAATTTGAGTGCCAAACACTGCGAAAGCAAGTGCTCAAAGCTCATGGTACCATCAAAGACGAGGTAAGCCACTTCTTCTCAAGTTCTAATCCACTTGTTTTTCGTTCCAAGATGGCTCAACAAATCAAAGATGTCAGCAAGAGGCTAGACAAGGTT…	MAESFLFSIAESLITKLASHAFQEASRVVGLYDHLRDLKKTLSLVKAVLLDADQKQEHNHELQEWLRQLKSVFYDAEDVLNEFECQTLRKQVLKAHGTIKDEVSHFFSSSNPLVFRSKMAQQIKDVSKRLDKVAADRHKFGLRIIDVDTRVVHRRDTSRMTHSRVSDSDVIGREHDKEKIIELLMQQNPNDDDKSLSVIPIVGIGGLGKTTLAQFVFNDKRIYECFSLKMWVCVSDDFDINQLIMKIINSANDANAPFRQQNLNMVDLEQLQNQLRSKLAGKKFLLVLDDVWNDDRVKWVELRNLIQEGVAGSKILVTTRIDSIASMMGTVTSHKLQRLSSENSLSLFVKWAFKEGEEQKHPHLVNIGKEIVKKCRGIPLAVRTLGSSLFSKFEANEWE…
HK_NBARC_NBARC.Chr19.9	Chr19	TGFam.AUG	23640238	23648714	ATGGCTGAATCATTTATCTTCAGCATTGTGGAGTCACTCATTGAAAAGCTTGCTTCTCGGGCTTTCCAAGAAGCTTCTGAGGCGCTGGACGTATACGATCATCTACGAGAGTTTGAAAAAACTCTCTCATTAGTCAAGGCAGTGCTGCTAGATGCTGAGCAAAAGCAGGAGCATAACCATGAGCTTCGGCAATGGCTGAGGCAGCTCAAAAGTGTCTTCTATGATGCCGAAGATGTGTTGGATGAATTTGAGTGCCAAACACTGCGAAAGCAAGTGCTCAAAGTTCATGGTAACATCAAAGACGAGGTAAGCCACTTCTTCTCAAGTTCTAATCCACTTGTTTTTCATTGCAAGATGGCTCAGAAAATCAAAGATTGCAGCAAGAGGCTAGACAAGGTT…	MAESFIFSIVESLIEKLASRAFQEASEALDVYDHLREFEKTLSLVKAVLLDAEQKQEHNHELRQWLRQLKSVFYDAEDVLDEFECQTLRKQVLKVHGNIKDEVSHFFSSSNPLVFHCKMAQKIKDCSKRLDKVAADRHKAITKSIEKRKLAGKKFLLVLDDVWNDDLVKWVELRNLIQEGVAAGSKILVTTRIDSIASMMGTVTSHKLQSLSPEDSCLGSEPDNGGRDGCADGGSVGMGSGGGMAGEGGMVVGAVSVGDGVGLSGGGNGGGSSGVRGRVSIGVWVRNVCAEKEDGGGVGMGGGGGGGDCTKDDGCSQNQSQGIELNVQKDEGFVTRNGMSATEMGFVPLVVLLLVCFVPHNKDSLSLFVKWAFKEGEEEKHPHLVNITEEIVKKCRGVP…
HK_NBARC_NBARC.Chr19.10	Chr19	TGFam.ISGAP	33488461	33489320	ATGGTTGAGGCTGCACTTAATGGTGTGCTTGGAAATTTGAGCTCTCTCGCTGGAACAGAGCTGGGAGAATTTCTGGGTTTCAATGGATACAAGAGAAAGCATGACAGCATGTTCAGTGAAATCAAGGCTAGACTTCAAGATGCTGAGGACAAACAATTCTCAGACGAAGCTACAAAGCATTGGCTGAGAAAGCTAAAAGATGCGGCTTACAAGCTGGATGACATCTTAGATGAGTGTGCCTATGAAGAATTGGGGTTGGAATTTGAAGGAGTCAAGTGTTGTCTATCAGAAATGGGGGACTTTAAAAAAACAACACTTGCTCAATTCATCTTGGTCACTACTCGTCTTTCAAAGGTTGCAACTATCATGGGAACAATGCCTTGTCATGAATTATCAAAG…	MVEAALNGVLGNLSSLAGTELGEFLGFNGYKRKHDSMFSEIKARLQDAEDKQFSDEATKHWLRKLKDAAYKLDDILDECAYEELGLEFEGVKCCLSEMGDFKKTTLAQFILVTTRLSKVATIMGTMPCHELSKLSHNDCWELFKHPAFGPNEEEQPELVAIGKEIVKCGGVPLAAITVGDLLRL
HK_NBARC_NBARC.Chr19.11	Chr19	TGFam.PM	36438986	36440324	ATGGCCCCCCAAACTAGCATTGTCCTTGGCACGAACAAATTGCTTCCACTACTAAGCGATGAAACAAAATTGGTCTGGGACATCCCAAAAGAATTTGCAGACATAAAAAAGGAACTAGAATACATTCAAGCTTTCCTCAAGGATGCAGATTCAAGGGCAGCAGAAGGAGGCAACGCAAATGAGGGAATCAAAACATGGGTGAAAGAGTTGAGGGAAGCATCTTTTCGCATAGAAGATGCCATTGATGAATACATGATCCATGTGGAACAAGAGCATCATGATCCTGGATGTGCTGCTTTACTCTGTCAGATTATTCACTTGATTGAAACTTTGATGCCTCGTCATCGAATAGCATCAGGGATTCAGCAGATTAAGTCAGTTATTGACAGAATCAAGCAG…	MAPQTSIVLGTNKLLPLLSDETKLVWDIPKEFADIKKELEYIQAFLKDADSRAAEGGNANEGIKTWVKELREASFRIEDAIDEYMIHVEQEHHDPGCAALLCQIIHLIETLMPRHRIASGIQQIKSVIDRIKQRGKEYNFLRQSVQWIDPGSASPHLDEDQIVGFEDPRDELIGWLVKGPVERIVISVVGMGGQGKTTLVGRVFNNQEVIAHFGGCRAWITVSQSYTVEGLLRDVLEKMCKEIREDPPLGISKMDLNSLIVEVKNYLQKKRYVVIFDDVWSVELWGQIENAMLDNNNGSRILITTRSKDVVDSCKNSPFVLFSNFFNGTKIFILFSTIILNESNKL*
HK_NBARC_NBARC.Chr19.12	Chr19	TGFam.ISGAP	36691196	36693814	ATGGCTGAATTATTCATCTTCAGCATCGCTGAGTCTCTCATAACAAAGCTTGCTTCTCATTCTTTCCAAGAAGCTTCTCGGGTGGTGGGTTTGTACGACCATCTCCGAGACCTTCAAAAGACTCTCTCATTAGTCAAGGCAGTGCTGTTAGATGCTGAGCAAAAGCAGGAGCATAACCATGAGCTGCAGGAATGGCTGAGGCAGCTCAAAAGTGTCTTCTATGACGCCGAAGATGTGTTGGATGAATTCGAATGCCAAACACTGCGAAAGCAAGTGCTCAAAGCTCATGGTACCATCAAAGACGAGGTAAGCCACTTCTTCTCAAGTTCTAATCCACTTGTTTTTCGTTCCAAGATGGCTCAACAAATCAAAGATGTCAGCAAGAGGCTAGACAAGGTT…	MAELFIFSIAESLITKLASHSFQEASRVVGLYDHLRDLQKTLSLVKAVLLDAEQKQEHNHELQEWLRQLKSVFYDAEDVLDEFECQTLRKQVLKAHGTIKDEVSHFFSSSNPLVFRSKMAQQIKDVSKRLDKVAADRHKFGLRIIDVDTRVVHRRATSRMTHSRVSDSDVIGREHDKENIIELLMQQNPNDDGKSLSVIPIVGIGGLGKTTLAKFVFNDKRIDECFSLKMWVCVSDDFDINQLIIKIINSVNVNDAPLRQQNLDMVDLEQLQNQLTSKLAGQKFLLVLDDVWNNDRVKWVELRNLLQEGVAAGSKILVTTRIDSIAFMMGTVTSHKLQSLSPENSMSLFVRWAFKEGEEEKHPHLLNIGKEIVKKCRGVPLAVRTLGSSLFSKFEANEW…
HK_NBARC_NBARC.Chr19.13	Chr19	TGFam.ISGAP	36704649	36706868	ATGGCTGAATCATTTATCTTCAGCATCGCTGAGTCTCTCATAACAAAGCTTGCTTCTCATGCTTTCCAAGAAGCTTCTCGGGTGGTGGGTTTGTACGACCATCTCCGAGACCTTAAAAAGACTCTCTCATATGTCAAGGCAGTGCTGTTAGATGCTGAGCAAAAGCAGGAGCATAACCATGAGCTGCAGGAATGGCTGAGGCAGCTCAAAAGTGTCTTCTATGACGCCGAAGATGTGTTGGATGAATTCGAATGCCAAACACTGCGAAAGCAAGTGCTCAAAGCTCATGGTACCATCAAAGACGAGGTAAGCCACTTCTTCTCAAGTTCTAATCCACTTGTTTTTCGTTCCAAGATGGCTCAACAAATCAAAGATGTCAGCAAGAGGCTAGACAAGGTT…	MAESFIFSIAESLITKLASHAFQEASRVVGLYDHLRDLKKTLSYVKAVLLDAEQKQEHNHELQEWLRQLKSVFYDAEDVLDEFECQTLRKQVLKAHGTIKDEVSHFFSSSNPLVFRSKMAQQIKDVSKRLDKVAADRHKFGLRIIDVDTRVVHRRDTSRMTHSRVSDSDVIGREHDKEKIIELLMQQNPNDDEKSLSVIPIVGIGGLGKTTLAKFVFNDKRIDGCFPLKMWVCVSDDFDINQLIIKIINSANVADAPLRQQNLDMVDLEQLQNQLRSRLAGKKFLLVLDDVWNDDRVRWVDLKNLIKVGVAAGSKILVTTRIDSIASMMGTVASYKLQSLSPKNSLSLFVKWAFKNEGEEEKHPHLVNIGKEIVNKCKGVPLAVRTLGSLLFSKFEANE…
[truncated: 34 more rows]
